# Supplementary material
Source: PubMed Central journal article supplement (PMC4844805)
Supplement: NIHMS755500-supplement-1.pdf [file NIHMS755500-supplement-1.pdf]

**Supplementary Information For**

**Copper-Catalyzed Enantioselective Stereodivergent Synthesis of Amino Alcohols**

Shi-Liang Shi, Zackary L. Wong and Stephen L. Buchwald\*

Department of Chemistry, Massachusetts Institute of Technology

Cambridge, Massachusetts 02139, United States

Fax: (+1) 617 253 3297

E-mail: sbuchwal@mit.edu

**Contents**

|                                                                                |     |
|--------------------------------------------------------------------------------|-----|
| <b>1. General Information</b>                                                  | S2  |
| <b>2. Reaction Optimization</b>                                                | S4  |
| <b>3. Asymmetric Hydrosilylation/Hydroamination of Enals</b>                   | S7  |
| <b>4. Asymmetric Hydrosilylation/Hydroamination of Enones</b>                  | S23 |
| <b>5. Determination of the Absolute and Relative Configuration of Products</b> | S36 |
| <b>6. Preparation of Substrates</b>                                            | S37 |
| <b>7. References</b>                                                           | S41 |
| <b>8. Spectroscopic Data (HPLC and NMR)</b>                                    | S43 |

## 1. General Information

All the reactions were set up on the benchtop and conducted under an argon atmosphere. Flash column chromatography was performed using Silicycle SiliaFlash P60 (230–400 mesh) silica gel. Anhydrous tetrahydrofuran (THF) was purified by passing through two packed columns of neutral alumina and copper (II) oxide under a positive pressure of argon.  $\text{Cu}(\text{OAc})_2$  was purchased from Sigma-Aldrich Chemical Co. and used as received. DTBM-SEPHOS was purchased from Takasago International Co. and used as received.  $\text{HSiMe}(\text{OMe})_2$  (moisture-sensitive) was purchased from TCI and was stored under nitrogen at  $-20\text{ }^\circ\text{C}$ .  $\alpha$ -Methyl-*trans*-cinnamaldehyde and (*E*)-4-phenylbut-3-en-2-one were purchased from Sigma-Aldrich Chemical Co. and used as received. *Cis*- and *trans*-  $\alpha$ -amylcinnamaldehyde were purchased from TCI and used as received. Other enal and enone substrates were prepared following literature procedures as indicated in each case. Hydroxylamine esters were prepared following literature procedures.<sup>1</sup> All reported yields of the copper-catalyzed hydrosilylation/hydroamination reactions stated are isolated yields and the average of at least two experiments unless otherwise stated. The screw-cap reaction tubes, caps and septa used in the copper-catalyzed hydroamination reactions are shown as follows:

Fisher 20 x 125 mm tubes (Cat. No. 1495937A, for 0.5 or 1.0 mmol scale reactions)

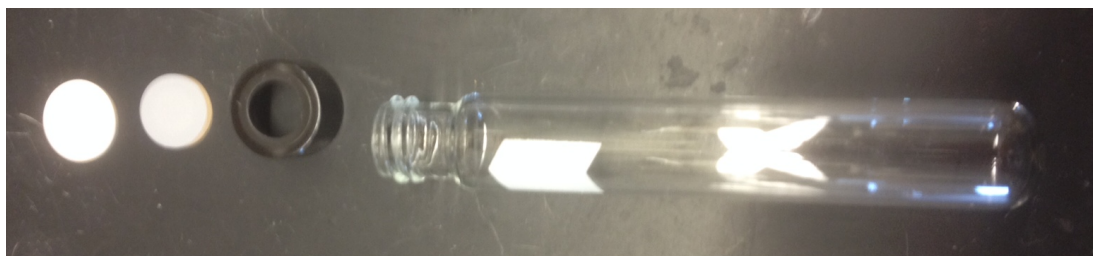

Caps: CLOSURE OT S/T 18-400TH 14 (Cat. No. 033407G)

Gray septa: Thermo Scientific SPTA SPTA PTFE/SIL F/18-400 10 (Cat. No. 03394B)

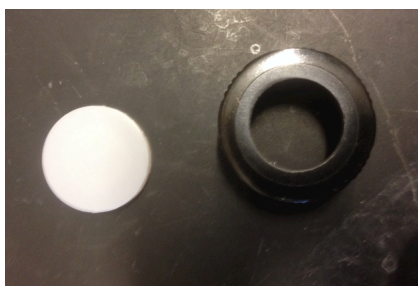

### General Analytical Information

All new compounds were characterized by NMR spectroscopy, IR spectroscopy, high-resolution mass spectroscopy (or elemental analysis), and melting point (if solids). NMR spectra were recorded on a Bruker AMX 400 spectrometer and were calibrated using residual solvent as an internal reference (CDCl<sub>3</sub>: 7.26 ppm for <sup>1</sup>H NMR and 77.16 ppm for <sup>13</sup>C NMR). All IR spectra were taken on a Thermo Scientific Nicolet iS5 spectrometer (iD5 ATR, diamond). Elemental analyses were performed by Atlantic Microlabs Inc., Norcross, GA. HRMS spectra were recorded on a Bruker Daltonics APEXIV 4.7 Tesla Fourier transform ion cyclotron resonance mass spectrometer (FT-ICR-MS). Temperatures were controlled for cooling baths using a Neslab CC100 Immersion cooler. Melting points (M.P.) were obtained on a Mel-Temp capillary melting point apparatus. GC analyses were performed on an Agilent 6890 gas chromatograph with an FID detector using a J & W DB-1 column (10 m, 0.1 mm I.D.). The enantiomeric excesses (ee) of the products were determined by high-performance liquid chromatography (HPLC) analysis performed on Agilent 1200 Series chromatographs using a chiral column (25 cm) as noted for each compound. Optical rotations were measured on a Jasco P-1010 polarimeter with [ $\alpha$ ]<sub>D</sub> values reported in degrees; concentration (c) is in g/100 mL.

## 2. Reaction Optimization

### Evaluation of Aminating Reagents for Hydrosilylation/Hydroamination Reactions

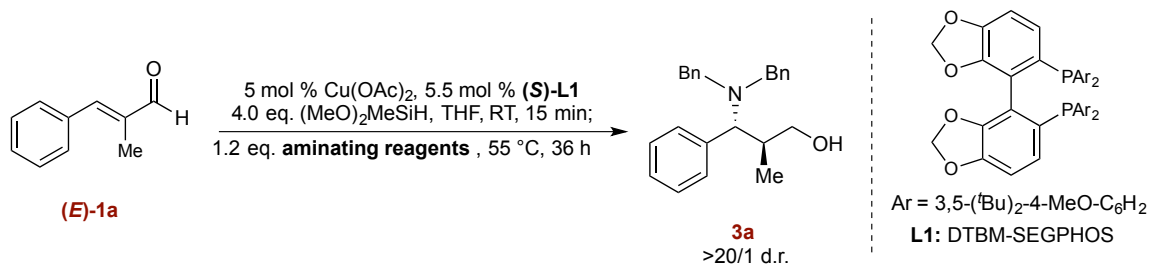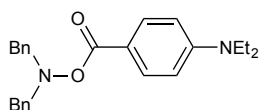

>99% yield, >99% e.e.

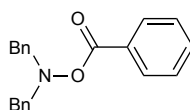

83% yield, >99% e.e.

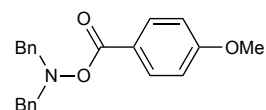

96% yield, >99% e.e.

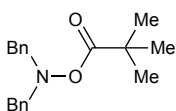

48% yield, e.e.: n.d.

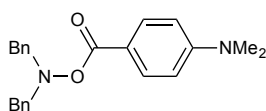

82% yield, >99% e.e.

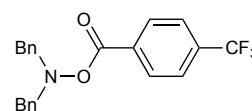

17% yield, e.e.: n.d.

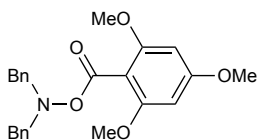

69% yield, e.e.: n.d.

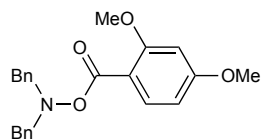

92% yield, >99% e.e.

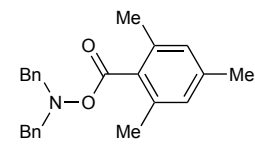

89% yield, >99% e.e.



## Evaluation of Ligands for Hydrosilylation/Hydroamination Reactions

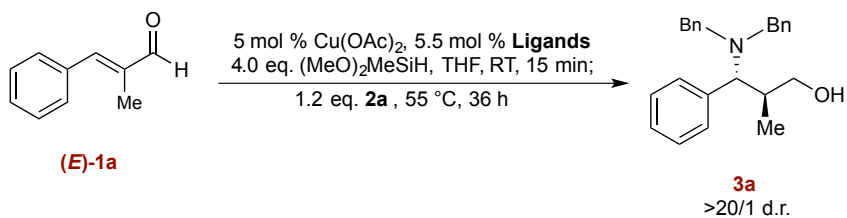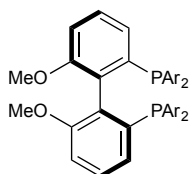

Ar = 3,5-(<sup>t</sup>Bu)<sub>2</sub>-C<sub>6</sub>H<sub>3</sub>  
 (S)-DTB-MeO-BIPHEP  
**76% yield, 98% e.e.**

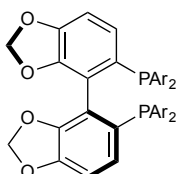

Ar = 3,5-(Me)<sub>2</sub>-C<sub>6</sub>H<sub>3</sub>  
**L2 = (S)-DM-SEGPHOS**  
**59% yield, 96% e.e.**

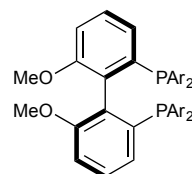

Ar = 3,5-(Me)<sub>2</sub>-C<sub>6</sub>H<sub>3</sub>  
 (R)-3,5-Xyl-MeO-BIPHEP  
**7% yield, e.e.: n.d.**

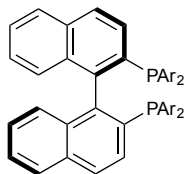

Ar = 3,5-(<sup>t</sup>Bu)<sub>2</sub>-4-MeO-C<sub>6</sub>H<sub>2</sub>  
 (R)-DTBM-BINAP  
**45% yield, 95% e.e.**

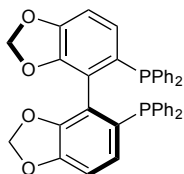

(S)-SEGPHOS  
**7% yield, e.e.: n.d.**

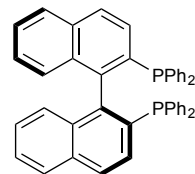

(S)-BINAP  
**0% yield**

## Hydroxylamine Esters 2a-2j<sup>1</sup>

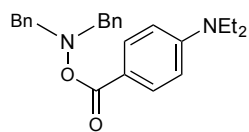

**2a**

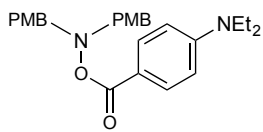

**2b**

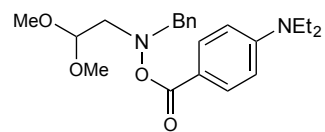

**2c**

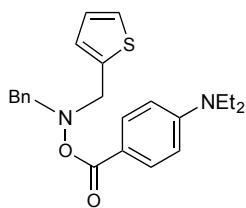

**2d**

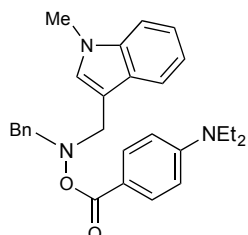

**2e**

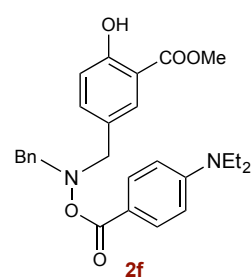

**2f**

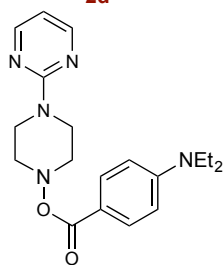

**2g**

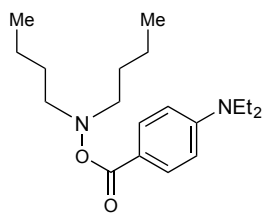

**2h**

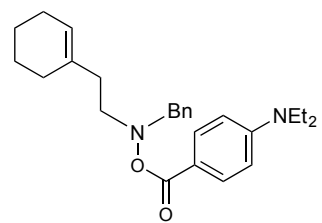

**2i**

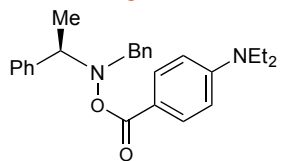

**2j**

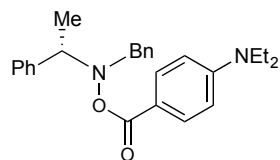

**ent-2j**

### 3. Copper-Catalyzed Asymmetric Hydrosilylation/Hydroamination of Enals

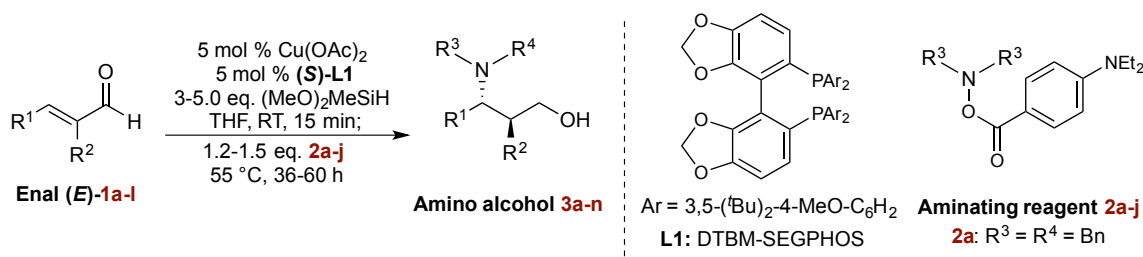

**General Procedure A:** An oven-dried screw-cap reaction tube equipped with a magnetic stir bar was charged with Cu(OAc)<sub>2</sub> (4.5 mg, 0.025 mmol, 5 mol %) and (*S*)-DTBM-SEGPHOS (33.2 mg, 0.0275 mmol, 5.5 mol %). The reaction tube was sealed with a screw-cap septum, then evacuated and backfilled with argon (this process was repeated a total of two times). Anhydrous THF (0.5 mL) and (MeO)<sub>2</sub>MeSiH (0.25 mL, 2.0 mmol, 4.0 equiv) were added sequentially via syringe. The resulting mixture was stirred at room temperature (rt) for 15 min until the color changed from blue to orange. A second oven-dried screw-cap reaction tube equipped with a stir bar was charged with enal substrate **1** (0.5 mmol, 1.0 equiv). The reaction tube was sealed with a screw-cap septum, and then evacuated and backfilled with argon (this process was repeated a total of two times). The catalyst solution from the first reaction tube was added slowly at rt via syringe. After stirring at rt for an additional 15 min, hydroxylamine ester **2** (1.0 mmol, 1.0 equiv) was then quickly added to the reaction mixture under a positive pressure of argon. The reaction mixture was stirred at 55 °C for 36 h. After completion, the reaction mixture was allowed to cool to room rt and the solvent was removed *in vacuo* with the aid of a rotary evaporator. A saturated solution of NH<sub>4</sub>F in MeOH (3 mL) was added and the mixture was stirred at rt for 10 min, followed by addition of a saturated aqueous solution of Na<sub>2</sub>CO<sub>3</sub> (10 mL) and EtOAc (20 mL). The phases were separated and the aqueous layer was extracted with EtOAc (2 x 10 mL). The combined organic phases were washed with a saturated aqueous solution of Na<sub>2</sub>CO<sub>3</sub> (2 x 10 mL) and then concentrated *in vacuo*. The diastereomeric ratio of the crude amino alcohol product, **3** was determined by <sup>1</sup>H-NMR analysis to be >20/1 in all cases. The crude products were purified by flash column chromatography. The enantiomeric excesses of the products were determined by HPLC analysis using chiral stationary phases as indicated for each substrate.

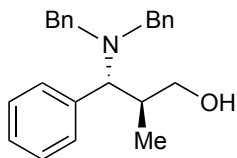

**(2*S*,3*R*)-3-(dibenzylamino)-2-methyl-3-phenylpropan-1-ol (3a)** was prepared following **General Procedure A**, using (*E*)-2-methyl-cinnamaldehyde (73 mg, 0.5 mmol, 1.0 equiv), (MeO)<sub>2</sub>MeSiH (0.25 mL, 2.0 mmol, 4.0 equiv), and 4-(((dibenzylamino)oxy)carbonyl)-*N,N*-diethylaniline (**2a**) (233 mg, 0.6 mmol, 1.2 equiv) in THF (0.5 mL), the reaction mixture was stirred at 55 °C for 36 h. The crude product was purified by flash column chromatography (0-8% EtOAc in hexanes) to provide the title compound as a pale yellow liquid in 95% yield (164 mg). IR (thin film, cm<sup>-1</sup>) 3027, 2926, 1452, 908, 729, 697; <sup>1</sup>H NMR (400 MHz, CDCl<sub>3</sub>) δ: 7.53 – 7.26 (m, 15H), 6.09 – 5.73 (br s, 1H), 4.11 (d, *J* = 13.2 Hz, 2H), 3.91 (dd, *J* = 10.8, 3.9 Hz, 1H), 3.79 – 3.59 (m, 2H), 3.04 (d, *J* = 13.2 Hz, 2H), 2.69 – 2.80 (m, 1H), 0.56 (d, *J* = 6.6 Hz, 3H); <sup>13</sup>C NMR (101 MHz, CDCl<sub>3</sub>) δ: 138.37, 134.15, 129.92, 129.09, 128.53, 127.93, 127.44, 127.21, 69.30, 68.92, 53.95, 33.85, 15.27. [α]<sub>D</sub><sup>23</sup> = 141.9 (c = 1.0, CHCl<sub>3</sub>). HPLC analysis (IC, 2% IPA in hexanes, 1 mL/min, 220 nm) indicated >99% ee: t<sub>R</sub> (minor) = 11.8 min, t<sub>R</sub> (major) = 16.5 min. HRMS (DART-TOF) calculated for C<sub>24</sub>H<sub>27</sub>NO [M+H]<sup>+</sup> *m/z* 346.2165, found 346.2147.

For a 5 mmol-scale reaction: Following **General Procedure A**, using Cu(OAc)<sub>2</sub> (9.0 mg, 0.05 mmol, 1 mol %), (*S*)-DTBM-SEGPHOS (66.4 mg, 0.055 mmol, 1.1 mol %), (*E*)-2-methyl-cinnamaldehyde (731 mg, 5 mmol, 1.0 equiv), (MeO)<sub>2</sub>MeSiH (1.85 mL, 15.0 mmol, 3.0 equiv), and **2a** (2.33 g, 6.0 mmol, 1.2 equiv) in THF (5 mL), the reaction mixture was stirred at 55 °C for 60 h. The crude product was purified by flash column chromatography (0-8% EtOAc in hexanes) to provide the title compound as a pale yellow liquid in 96% yield (1.66 g) and >99% ee.

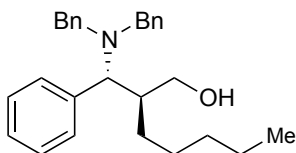

**(*S*)-2-((*R*)-3-(dibenzylamino)(phenyl)methyl)heptan-1-ol ((*S,R*)-3b)**. was prepared following **General Procedure A**, using Cu(OAc)<sub>2</sub> (4.5 mg, 0.025 mmol, 5 mol %), (*S*)-DTBM-SEGPHOS (33.2 mg, 0.0275 mmol, 5.5 mol %), (*E*)-2-benzylideneheptanal (101 mg, 0.5 mmol, 1.0 equiv), (MeO)<sub>2</sub>MeSiH (0.25 mL, 2.0 mmol, 4.0 equiv), and **2a** (291 mg, 0.75 mmol, 1.5 equiv) in THF (0.5 mL), the reaction mixture was stirred at 55 °C for 48 h. The crude product was purified by flash column chromatography (0-10% Et<sub>2</sub>O in hexanes) to provide the title compound as a colorless liquid in 96% yield (193 mg). IR (thin film, cm<sup>-1</sup>) 2927, 1494, 1453, 1028, 699; <sup>1</sup>H

NMR (400 MHz, CDCl<sub>3</sub>)  $\delta$ : 7.46 – 7.17 (m, 15H), 5.59 (s, 1H), 4.00 (d,  $J$  = 12.9 Hz, 3H), 3.68 (d,  $J$  = 11.3 Hz, 1H), 3.48 (dd,  $J$  = 11.1, 7.7 Hz, 1H), 2.93 (d,  $J$  = 13.2 Hz, 2H), 2.54 – 2.34 (m, 1H), 1.25 – 0.70 (m, 11H); <sup>13</sup>C NMR (101 MHz, CDCl<sub>3</sub>)  $\delta$ : 138.59, 134.27, 130.22, 129.32, 128.74, 128.08, 127.61, 127.42, 68.03, 66.57, 54.24, 39.07, 31.87, 28.95, 26.75, 22.43, 13.99.  $[\alpha]_D^{23}$  = 121.3 (c = 2.0, CHCl<sub>3</sub>). HPLC analysis (OD-H, 2% IPA in hexanes, 1 mL/min, 220 nm) indicated >99% ee:  $t_R$  (minor) = 7.1 min,  $t_R$  (major) = 12.4 min. HRMS (DART-TOF) calculated for C<sub>28</sub>H<sub>35</sub>NO [M+H]<sup>+</sup>  $m/z$  402.2791, found 402.2788.

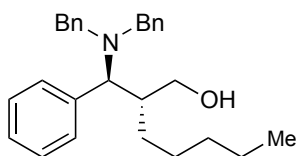

**(R)-2-((S)-(dibenzylamino)(phenyl)methyl)heptan-1-ol ((R,S)-3b)** was prepared following **General Procedure A**, using Cu(OAc)<sub>2</sub> (4.5 mg, 0.025 mmol, 5 mol %), (R)-DTBM-SEGPHOS (33.2 mg, 0.0275 mmol, 5.5 mol %), (E)-2-benzylideneheptanal (101 mg, 0.5 mmol, 1.0 equiv), (MeO)<sub>2</sub>MeSiH (0.25 mL, 2.0 mmol, 4.0 equiv), and **2a** (291 mg, 0.75 mmol, 1.5 equiv) in THF (0.5 mL), the reaction mixture was stirred at 55 °C for 48 h. The crude product was purified by flash column chromatography (0-10% Et<sub>2</sub>O in hexanes) to provide the title compound as a colorless liquid in 99% yield (200 mg). IR (thin film, cm<sup>-1</sup>) 2927, 1494, 1452, 1028, 698; <sup>1</sup>H NMR (400 MHz, CDCl<sub>3</sub>)  $\delta$ : 7.50 – 7.12 (m, 15H), 5.60 (br s, 1H), 4.16 – 3.85 (m, 3H), 3.69 (d,  $J$  = 11.3 Hz, 1H), 3.49 (dd,  $J$  = 11.1, 7.7 Hz, 1H), 2.94 (d,  $J$  = 13.2 Hz, 2H), 2.54 – 2.33 (m, 1H), 1.23 – 0.67 (m, 11H); <sup>13</sup>C NMR (101 MHz, CDCl<sub>3</sub>)  $\delta$ : 138.57, 134.25, 130.20, 129.31, 128.72, 128.07, 127.60, 127.40, 68.01, 66.55, 54.23, 39.06, 31.85, 28.94, 26.73, 22.42, 13.98.  $[\alpha]_D^{23}$  = – 121.1 (c = 1.0, CHCl<sub>3</sub>). HPLC analysis (OD-H, 2% IPA in hexanes, 1 mL/min, 220 nm) indicated >99% ee:  $t_R$  (major) = 7.1 min,  $t_R$  (minor) = 12.6 min. HRMS (DART-TOF) calculated for C<sub>28</sub>H<sub>35</sub>NO [M+H]<sup>+</sup>  $m/z$  495.2791, found 495.2788.

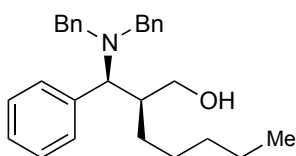

**(S)-2-((S)-(dibenzylamino)(phenyl)methyl)heptan-1-ol ((S,S)-3b)** was prepared following **General Procedure A**, using Cu(OAc)<sub>2</sub> (4.5 mg, 0.025 mmol, 5 mol %), (S)-DTBM-SEGPHOS (33.2 mg, 0.0275 mmol, 5.5 mol %), (Z)-2-benzylideneheptanal (101 mg, 0.5 mmol, 1.0 equiv),

(MeO)<sub>2</sub>MeSiH (0.25 mL, 2.0 mmol, 4.0 equiv), and **2a** (291 mg, 0.75 mmol, 1.5 equiv) in THF (0.5 mL), the reaction mixture was stirred at 55 °C for 60 h. The crude product was purified by flash column chromatography (0-10% Et<sub>2</sub>O in hexanes) to provide the title compound as a colorless liquid in 76% yield (153 mg). IR (thin film, cm<sup>-1</sup>) 2925, 1494, 1453, 1028, 698; <sup>1</sup>H NMR (400 MHz, CDCl<sub>3</sub>) δ: 7.43 – 7.35 (m, 6H), 7.31 (t, *J* = 7.5 Hz, 5H), 7.25 – 7.15 (m, 3H), 3.90 (d, *J* = 13.8 Hz, 2H), 3.62 (d, *J* = 10.5 Hz, 1H), 3.42 (dd, *J* = 11.3, 4.1 Hz, 1H), 3.22 (dd, *J* = 11.3, 4.4 Hz, 1H), 3.15 – 2.95 (m, 2H), 2.35 – 2.27 (m, 1H), 2.19 – 1.99 (m, 1H), 1.52 – 1.23 (m, 8H), 1.00 – 0.89 (m, 3H); <sup>13</sup>C NMR (101 MHz, CDCl<sub>3</sub>) δ: 139.80, 136.43, 129.71, 128.97, 128.38, 128.19, 127.40, 126.96, 64.11, 62.82, 53.78, 40.78, 32.68, 27.56, 26.49, 22.93, 14.33. [α]<sub>D</sub><sup>23</sup> = 65.8 (c = 2.0, CHCl<sub>3</sub>). HPLC analysis (IC, 2% IPA in hexanes, 1 mL/min, 220 nm) indicated >99% ee: t<sub>R</sub> (major) = 7.4 min, t<sub>R</sub> (minor) = 11.6 min. HRMS (DART-TOF) calculated for C<sub>28</sub>H<sub>35</sub>NO [M+H]<sup>+</sup> *m/z* 402.2791, found 402.2798.

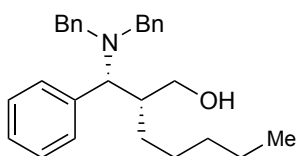

**(R)-2-((R)-(dibenzylamino)(phenyl)methyl)heptan-1-ol ((R,R)-3b)** was prepared following **General Procedure A**, using Cu(OAc)<sub>2</sub> (4.5 mg, 0.025 mmol, 5 mol %), (*R*)-DTBM-SEGPHOS (33.2 mg, 0.0275 mmol, 5.5 mol %), (*Z*)-2-benzylideneheptanal (101 mg, 0.5 mmol, 1.0 equiv), (MeO)<sub>2</sub>MeSiH (0.25 mL, 2.0 mmol, 4.0 equiv), and **2a** (291 mg, 0.75 mmol, 1.5 equiv) in THF (0.5 mL), the reaction mixture was stirred at 55 °C for 48 h. The crude product was purified by flash column chromatography (0-10% Et<sub>2</sub>O in hexanes) to provide the title compound as a colorless liquid in 78% yield (157 mg). IR (thin film, cm<sup>-1</sup>) 2924, 1493, 1453, 742, 696; <sup>1</sup>H NMR (400 MHz, CDCl<sub>3</sub>) δ: 7.48 – 7.16 (m, 15H), 3.89 (d, *J* = 13.8 Hz, 2H), 3.62 (d, *J* = 10.5 Hz, 1H), 3.44 (dd, *J* = 11.2, 4.1 Hz, 1H), 3.24 (dd, *J* = 11.3, 4.4 Hz, 1H), 3.06 (d, *J* = 13.8 Hz, 2H), 2.35 – 2.27 (m, 1H), 2.12 – 2.03 (m, 1H), 1.50 – 1.23 (m, 8H), 0.98 – 0.87 (m, 3H); <sup>13</sup>C NMR (101 MHz, CDCl<sub>3</sub>) δ: 139.81, 136.45, 129.74, 129.00, 128.41, 128.24, 127.44, 126.99, 64.21, 62.92, 53.81, 40.82, 32.70, 27.62, 26.55, 22.95, 14.35. [α]<sub>D</sub><sup>23</sup> = -65.6 (c = 1.0, CHCl<sub>3</sub>). HPLC analysis (IC, 2% IPA in hexanes, 1 mL/min, 220 nm) indicated >99% ee: t<sub>R</sub> (minor) = 7.4 min, t<sub>R</sub> (major) = 11.6 min. HRMS (DART-TOF) calculated for C<sub>28</sub>H<sub>35</sub>NO [M+H]<sup>+</sup> *m/z* 402.2791, found 495.2788.

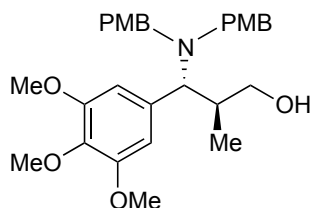

**(2S,3R)-3-(bis(4-methoxybenzyl)amino)-2-methyl-3-(3,4,5-trimethoxyphenyl)propan-1-ol (3c)** was prepared following **General Procedure A**, using (*E*)-2-methyl-3-(3,4,5-trimethoxyphenyl)acrylaldehyde (118 mg, 0.5 mmol, 1.0 equiv), (MeO)<sub>2</sub>MeSiH (0.25 mL, 2.0 mmol, 4.0 equiv), and 4-(((bis(4-methoxybenzyl)amino)oxy)carbonyl)-*N,N*-diethylaniline (**2b**) (337 mg, 0.75 mmol, 1.5 equiv) in THF (0.5 mL), the reaction mixture was stirred at 55 °C for 60 h. The crude product was purified by flash column chromatography (33-50% EtOAc in hexanes) to provide the title compound colorless oil in 92% yield (228 mg). IR (thin film, cm<sup>-1</sup>) 2932, 2835, 1510, 1242, 1126; <sup>1</sup>H NMR (400 MHz, CDCl<sub>3</sub>) δ: 7.28 (d, *J* = 8.6 Hz, 3H), 6.87 (d, *J* = 8.6 Hz, 3H), 6.37 (s, 2H), 5.98 (br s, 1H), 4.05 – 3.86 (m, 11H), 3.78 (s, 8H), 3.58 – 3.41 (m, 2H), 2.93 (d, *J* = 13.0 Hz, 2H), 2.64 – 2.57 (m, 1H), 0.52 (d, *J* = 6.6 Hz, 3H); <sup>13</sup>C NMR (101 MHz, CDCl<sub>3</sub>) δ: 158.89, 152.81, 137.39, 130.37, 130.06, 114.07, 107.30, 69.81, 69.37, 60.94, 56.26, 55.25, 53.44, 33.97, 15.36. [α]<sub>D</sub><sup>23</sup> = 82.8 (c = 2.0, CHCl<sub>3</sub>). HPLC analysis (IA, 20% IPA in hexanes, 0.5 mL/min, 220 nm) indicated >99% ee: t<sub>R</sub> (major) = 17.6 min, t<sub>R</sub> (minor) = 18.6 min. HRMS (DART-TOF) calculated for C<sub>24</sub>H<sub>27</sub>NO [M+H]<sup>+</sup> *m/z* 496.2694, found 496.2680.

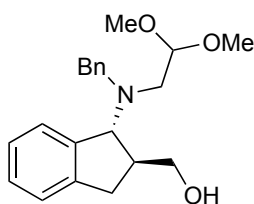

**((1R,2S)-1-(benzyl(2,2-dimethoxyethyl)amino)-2,3-dihydro-1H-inden-2-yl)methanol (3d)** was prepared following **General Procedure A**, using 1*H*-indene-2-carbaldehyde<sup>2</sup> (72 mg, 0.5 mmol, 1.0 equiv), (MeO)<sub>2</sub>MeSiH (0.25 mL, 2.0 mmol, 4.0 equiv), and 4-(((benzyl(2,2-dimethoxyethyl)amino)oxy)carbonyl)-*N,N*-diethylaniline (**2c**) (290 mg, 0.75 mmol, 1.5 equiv) in THF (0.5 mL), the reaction mixture was stirred at 55 °C for 60 h. The crude product was purified by flash column chromatography (25-50% EtOAc in hexanes) to provide the title compound as a yellow liquid in 67% yield (114 mg). IR (thin film, cm<sup>-1</sup>) 3431, 2928, 1453, 1125, 1062, 748; <sup>1</sup>H NMR (400 MHz, CDCl<sub>3</sub>) δ: 7.45 – 7.27 (m, 9H), 4.44 (d, *J* = 7.5 Hz, 1H), 4.22 (t, *J* = 5.3 Hz, 1H), 3.91 – 3.57 (m, 5H), 3.26 (d, *J* = 1.1 Hz, 6H), 3.05 – 2.86 (m, 3H), 2.78 – 2.74 (m, 1H), 2.55

(dd,  $J = 15.7, 8.2$  Hz, 1H);  $^{13}\text{C}$  NMR (101 MHz,  $\text{CDCl}_3$ )  $\delta$ : 142.65, 142.43, 140.09, 128.96, 128.30, 127.45, 127.10, 126.18, 125.12, 124.79, 104.67, 71.90, 66.81, 56.35, 54.03, 53.92, 53.75, 44.56, 33.20.  $[\alpha]_{\text{D}}^{23} = 67.0$  ( $c = 2.0$ ,  $\text{CHCl}_3$ ). HPLC analysis (OJ-H, 4% IPA in hexanes, 1 mL/min, 220 nm) indicated >99% ee:  $t_{\text{R}}$  (minor) = 13.4 min,  $t_{\text{R}}$  (major) = 30.0 min. HRMS (DART-TOF) calculated for  $\text{C}_{21}\text{H}_{27}\text{NO}_3$   $[\text{M}+\text{H}]^+$   $m/z$  342.2064, found 342.2048.

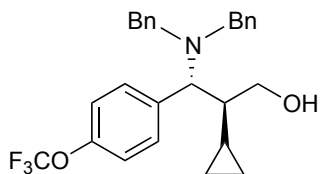

**(2*S*,3*R*)-2-cyclopropyl-3-(dibenzylamino)-3-(4-(trifluoromethoxy)phenyl)propan-1-ol (3e)**

was prepared following **General Procedure A**, using (*E*)-2-cyclopropyl-3-(4-(trifluoromethoxy)phenyl)acrylaldehyde (128 mg, 0.5 mmol, 1.0 equiv),  $(\text{MeO})_2\text{MeSiH}$  (0.25 mL, 2.0 mmol, 4.0 equiv), and **2a** (290 mg, 0.75 mmol, 1.5 equiv) in THF (0.5 mL), the reaction mixture was stirred at 55 °C for 60 h. The crude product was purified by flash column chromatography (5-10% EtOAc in hexanes) to provide the title compound as a colorless liquid in 76% yield (173 mg). IR (thin film,  $\text{cm}^{-1}$ ) 1256, 1221, 1163, 748, 699;  $^1\text{H}$  NMR (400 MHz,  $\text{CDCl}_3$ )  $\delta$ : 7.39 – 7.28 (m, 14H), 5.09 (s, 1H), 4.06 – 3.89 (m, 4H), 3.68 – 3.64 (m, 1H), 3.02 (d,  $J = 13.1$  Hz, 2H), 1.73 (m, 1H), 1.36 (m, 2H), 0.26 – 0.23 (m, 1H), 0.08 – 0.03 (m, 2H), -0.01 – -0.18 (m, 1H), -0.29 (m, 1H);  $^{13}\text{C}$  NMR (101 MHz,  $\text{CDCl}_3$ )  $\delta$ : 148.60, 138.39, 133.29, 131.91, 129.23, 128.86, 127.61, 120.64, 120.05 (d,  $J = 258.6$  Hz), 67.91, 67.79, 54.22, 44.32, 32.05, 12.68, 6.85, 2.74.  $[\alpha]_{\text{D}}^{23} = 79.1$  ( $c = 2.0$ ,  $\text{CHCl}_3$ ). HPLC analysis (OD-H, 20% IPA in hexanes, 0.5 mL/min, 220 nm) indicated 95% ee:  $t_{\text{R}}$  (minor) = 8.1 min,  $t_{\text{R}}$  (major) = 10.5 min. HRMS (DART-TOF) calculated for  $\text{C}_{27}\text{H}_{28}\text{F}_3\text{NO}_2$   $[\text{M}+\text{H}]^+$   $m/z$  456.2145, found 456.2132.

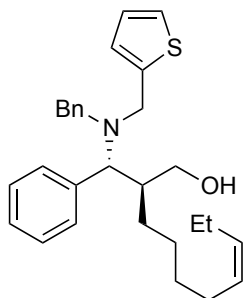

**(*S,Z*)-2-((*R*)-(benzyl(thiophen-2-ylmethyl)amino)(phenyl)methyl)dec-7-en-1-ol (3f)** was prepared following **General Procedure A**, using (*2E,7Z*)-2-benzylidenedec-7-enal (121 mg, 0.5 mmol, 1.0 equiv),  $(\text{MeO})_2\text{MeSiH}$  (0.25 mL, 2.0 mmol, 4.0 equiv), and 4-(((benzyl(thiophen-2-



ylmethyl)amino)oxy)carbonyl)-*N,N*-diethylaniline (**2d**) (296 mg, 0.75 mmol, 1.5 equiv) in THF (0.5 mL), the reaction mixture was stirred at 55 °C for 60 h. The crude product was purified by flash column chromatography (0-20% EtOAc in hexanes) to provide the title compound as a colorless liquid in 78% yield (174 mg). IR (thin film,  $\text{cm}^{-1}$ ) 2929, 1453, 1072, 1039, 698;  $^1\text{H}$  NMR (400 MHz,  $\text{CDCl}_3$ )  $\delta$ : 7.35 – 7.32 (m, 4H), 7.26 (t,  $J = 7.7$  Hz, 3H), 7.20 – 7.09 (m, 4H), 6.91 – 6.81 (m, 2H), 5.26 – 5.14 (m, 1H), 5.14 – 4.99 (m, 1H), 4.61 (br s, 1H), 4.09 – 3.86 (m, 3H), 3.63 (d,  $J = 11.3$  Hz, 1H), 3.48 (dd,  $J = 11.3, 6.8$  Hz, 1H), 3.18 (d,  $J = 13.9$  Hz, 1H), 2.89 (d,  $J = 13.5$  Hz, 1H), 2.30 (m, 1H), 1.83 (m, 2H), 1.74 (q,  $J = 7.1$  Hz, 2H), 1.19 – 0.93 (m, 4H), 0.83 – 0.70 (m, 5H);  $^{13}\text{C}$  NMR (101 MHz,  $\text{CDCl}_3$ )  $\delta$ : 142.40, 138.61, 134.35, 131.66, 130.06, 129.02, 128.95, 128.79, 128.19, 127.65, 127.45, 126.83, 126.74, 125.24, 67.12, 65.50, 53.97, 48.95, 39.42, 29.70, 28.76, 26.85, 26.65, 20.50, 14.44.  $[\alpha]_D^{23} = 115.9$  ( $c = 2.0$ ,  $\text{CHCl}_3$ ). HPLC analysis (OD-H, 2% IPA in hexanes, 1 mL/min, 220 nm) indicated >99% ee:  $t_R$  (major) = 11.0 min,  $t_R$  (minor) = 13.0 min. HRMS (DART-TOF) calculated for  $\text{C}_{29}\text{H}_{37}\text{NOS}$   $[\text{M}+\text{H}]^+$   $m/z$  448.2669, found 448.2670.

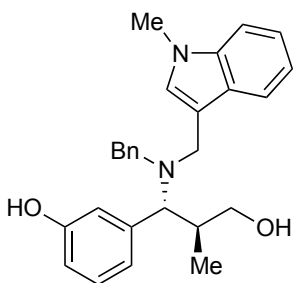

**3-((1*R*,2*S*)-1-(benzyl((1-methyl-1*H*-indol-3-yl)methyl)amino)-3-hydroxy-2-**

**methylpropyl)phenol (**3g**)** was prepared following **General Procedure A**, using (*E*)-3-(3-hydroxyphenyl)-2-methylacrylaldehyde (82 mg, 0.5 mmol, 1.0 equiv),  $(\text{MeO})_2\text{MeSiH}$  (0.31 mL, 2.5 mmol, 5.0 equiv), and 4-(((benzyl((1-methyl-1*H*-indol-3-yl)methyl)amino)oxy)carbonyl)-*N,N*-diethylaniline (**2e**) (265 mg, 0.6 mmol, 1.2 equiv) in THF (0.5 mL), the reaction mixture was stirred at 55 °C for 48 h. The crude product was purified by flash column chromatography (25-50% EtOAc in hexanes) to provide the title compound as a white foam in 92% yield (191 mg). IR (thin film,  $\text{cm}^{-1}$ ) 3010, 2915, 1587, 1097, 753;  $^1\text{H}$  NMR (400 MHz,  $\text{CDCl}_3$ )  $\delta$ : 7.65 (br s, 1H), 7.49 – 7.14 (m, 11H), 7.07 – 7.00 (m, 1H), 6.98 – 6.84 (m, 2H), 6.78 (d,  $J = 7.5$  Hz, 1H), 4.31 – 4.01 (m, 2H), 3.95 – 3.66 (m, 5H), 3.48 (t,  $J = 10.2$  Hz, 1H), 3.31 (d,  $J = 13.4$  Hz, 1H), 3.11 (d,  $J = 13.3$  Hz, 1H), 2.79 (m, 1H), 0.51 (d,  $J = 6.6$  Hz, 3H);  $^{13}\text{C}$  NMR (101 MHz,  $\text{CDCl}_3$ )  $\delta$ : 156.68, 138.49, 136.85, 135.75, 129.43, 129.27, 128.74, 128.74, 128.71, 127.36, 122.49, 121.68,

119.26, 118.70, 116.94, 115.02, 110.56, 109.35, 70.13, 69.78, 54.71, 44.58, 33.83, 32.83, 15.21.  $[\alpha]_D^{23} = 110.1$  ( $c = 1.0$ ,  $\text{CHCl}_3$ ). HPLC analysis (IA, 20% IPA in hexanes, 1 mL/min, 220 nm) indicated >99% ee:  $t_R$  (minor) = 5.5 min,  $t_R$  (major) = 6.5 min. HRMS (DART-TOF) calculated for  $\text{C}_{27}\text{H}_{30}\text{N}_2\text{O}_2$   $[\text{M}+\text{H}]^+$   $m/z$  415.2380, found 415.2389.

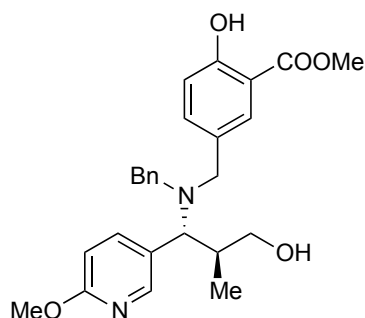

**methyl 5-((benzyl((1R,2S)-3-hydroxy-1-(6-methoxypyridin-3-yl)-2-methylpropyl) amino)-methyl)-2-hydroxybenzoate (3h)** was prepared following **General Procedure A**, using (*E*)-3-(6-methoxypyridin-3-yl)-2-methylacrylaldehyde (89 mg, 0.5 mmol, 1.0 equiv),  $(\text{MeO})_2\text{MeSiH}$  (0.31 mL, 2.5 mmol, 5.0 equiv), and methyl 5-((benzyl((4-(diethylamino)benzoyl)oxy)amino)-methyl)-2-hydroxybenzoate (**2f**) (278 mg, 0.6 mmol, 1.2 equiv) in THF (0.5 mL), the reaction mixture was stirred at 55 °C for 60 h. The crude product was purified by flash column chromatography (20-25% EtOAc in hexanes) to provide the title compound as white foam in 66% yield (149 mg). IR (thin film,  $\text{cm}^{-1}$ ) 1676, 1601, 1498, 1204, 751;  $^1\text{H}$  NMR (400 MHz,  $\text{CDCl}_3$ )  $\delta$ : 10.71 (s, 1H), 7.97 (m, 1H), 7.76 (m, 1H), 7.48 (td,  $J = 8.3, 2.4$  Hz, 2H), 7.41 – 7.29 (m, 4H), 7.27 – 7.24 (m, 1H), 6.96 (d,  $J = 8.6$  Hz, 1H), 6.83 (d,  $J = 8.5$  Hz, 1H), 5.47 (br s, 1H), 3.95 (m, 8H), 3.80 – 3.74 (m, 1H), 3.61 – 3.34 (m, 2H), 2.92 – 2.83 (m,  $J$ , 2H), 2.60 (m, 1H), 0.47 (d,  $J = 6.7$  Hz, 3H);  $^{13}\text{C}$  NMR (101 MHz,  $\text{CDCl}_3$ )  $\delta$ : 170.37, 163.69, 161.05, 148.09, 139.38, 138.00, 136.59, 130.54, 129.20, 128.82, 128.66, 127.58, 122.53, 118.26, 112.19, 110.73, 69.33, 66.00, 53.93, 53.53, 53.16, 52.45, 34.00, 15.40.  $[\alpha]_D^{23} = 92.0$  ( $c = 2.0$ ,  $\text{CHCl}_3$ ). HPLC analysis (OD-H, 20% IPA in hexanes, 1 mL/min, 220 nm) indicated >99% ee:  $t_R$  (minor) = 6.3 min,  $t_R$  (major) = 8.5 min. HRMS (DART-TOF) calculated for  $\text{C}_{26}\text{H}_{30}\text{N}_2\text{O}_5$   $[\text{M}+\text{H}]^+$   $m/z$  451.2227, found 451.2231.

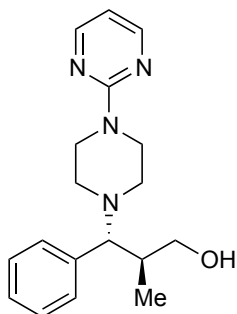

(*2S,3R*)-2-methyl-3-phenyl-3-(4-(pyrimidin-2-yl)piperazin-1-yl)propan-1-ol (**3i**) was prepared following **General Procedure A**, using (*E*)-2-methyl-cinnamaldehyde (73 mg, 0.5 mmol, 1.0 equiv), (MeO)<sub>2</sub>MeSiH (0.25 mL, 2.0 mmol, 4.0 equiv), and 4-(pyrimidin-2-yl)piperazin-1-yl 4-(diethylamino)benzoate (**2g**) (355 mg, 1.0 mmol, 2.0 equiv) in THF (0.5 mL), the reaction mixture was stirred at 55 °C for 36 h. The crude product was purified by flash column chromatography (0-2% Et<sub>2</sub>O in hexanes) to provide the title compound as a pale yellow oil in 76% yield (119 mg). IR (thin film, cm<sup>-1</sup>) 1585, 1494, 983, 750, 706; <sup>1</sup>H NMR (400 MHz, CDCl<sub>3</sub>) δ: 8.14 (d, *J* = 4.7 Hz, 2H), 7.34 – 7.13 (m, 3H), 7.12 – 6.93 (m, 2H), 6.32 (t, *J* = 4.7 Hz, 1H), 4.46 – 3.58 (m, 6H), 3.47 (d, *J* = 10.9 Hz, 1H), 2.95 – 2.47 (m, 3H), 2.31 (m, 2H), 0.50 (d, *J* = 6.7 Hz, 3H); <sup>13</sup>C NMR (101 MHz, CDCl<sub>3</sub>) δ: 161.13, 157.47, 133.79, 129.31, 127.87, 127.47, 109.74, 77.42, 70.56, 49.31, 43.48, 32.80, 14.87. [α]<sub>D</sub><sup>23</sup> = -16.2 (c = 3.0, CHCl<sub>3</sub>). HPLC analysis (OD-H, 15% IPA in hexanes, 1 mL/min, 220 nm) indicated >99% ee: t<sub>R</sub> (minor) = 8.0 min, t<sub>R</sub> (major) = 9.4 min. HRMS (DART-TOF) calculated for C<sub>18</sub>H<sub>24</sub>N<sub>4</sub>O [M+H]<sup>+</sup> *m/z* 313.2023, found 313.2011.

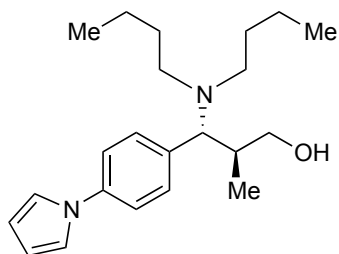

(*2S,3R*)-3-(4-(1*H*-pyrrol-1-yl)phenyl)-3-(dibutylamino)-2-methylpropan-1-ol (**3j**) was prepared following **General Procedure A**, using (*E*)-3-(4-(1*H*-pyrrol-1-yl)phenyl)-2-methylacrylaldehyde (106 mg, 0.5 mmol, 1.0 equiv), (MeO)<sub>2</sub>MeSiH (0.25 mL, 2.0 mmol, 4.0 equiv), and 4-(((dibutylamino)oxy)carbonyl)-*N,N*-diethylaniline (**2h**) (321 mg, 1.0 mmol, 2.0 equiv) in THF (0.5 mL), the reaction mixture was stirred at 55 °C for 36 h. The crude product was purified by flash column chromatography (20-30% EtOAc in hexanes) to provide the title compound as a colorless liquid in 76% yield (130 mg). IR (thin film, cm<sup>-1</sup>) 2956, 2928, 1519,

1329, 1070, 726;  $^1\text{H}$  NMR (400 MHz,  $\text{CDCl}_3$ )  $\delta$ : 7.58 (s, 1H), 7.42 – 7.32 (m, 2H), 7.24 – 7.15 (m, 2H), 7.10 (t,  $J = 2.2$  Hz, 2H), 6.34 (t,  $J = 2.2$  Hz, 2H), 3.80 (dd,  $J = 11.0, 3.5$  Hz, 1H), 3.75 – 3.57 (m, 2H), 2.67 (m, 2H), 2.62 – 2.44 (m, 1H), 2.05 – 1.87 (m, 2H), 1.64 – 1.46 (m, 4H), 1.43 – 1.22 (m, 4H), 0.93 (t,  $J = 7.3$  Hz, 6H), 0.56 (d,  $J = 6.7$  Hz, 3H);  $^{13}\text{C}$  NMR (101 MHz,  $\text{CDCl}_3$ )  $\delta$ : 139.94, 132.11, 130.84, 119.79, 119.17, 110.61, 71.42, 70.55, 50.13, 33.31, 30.07, 20.80, 15.24, 14.14.  $[\alpha]_{\text{D}}^{23} = 14.7$  ( $c = 1.0$ ,  $\text{CHCl}_3$ ). HPLC analysis (OD-H, 4% IPA in hexanes, 0.5 mL/min, 220 nm) indicated >99% ee:  $t_{\text{R}}$  (major) = 13.3 min,  $t_{\text{R}}$  (minor) = 14.3 min. HRMS (DART-TOF) calculated for  $\text{C}_{22}\text{H}_{34}\text{N}_2\text{O}$   $[\text{M}+\text{H}]^+$   $m/z$  343.2744, found 343.2730.

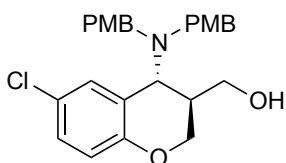

**((3S,4R)-4-(bis(4-methoxybenzyl)amino)-6-chlorochroman-3-yl)methanol (3k)** was prepared following **General Procedure A**, using 6-chloro-2*H*-chromene-3-carbaldehyde (97 mg, 0.5 mmol, 1.0 equiv),  $(\text{MeO})_2\text{MeSiH}$  (0.25 mL, 2.0 mmol, 4.0 equiv), and **2b** (337 mg, 0.75 mmol, 1.5 equiv) in THF (0.5 mL), the reaction mixture was stirred at 55 °C for 60 h. The crude product was purified by flash column chromatography (25-33% EtOAc in hexanes) to provide the title compound as a pale yellow liquid in 64% yield (145 mg). IR (thin film,  $\text{cm}^{-1}$ ) 1510, 1249, 1216, 1034, 753;  $^1\text{H}$  NMR (400 MHz,  $\text{CDCl}_3$ )  $\delta$ : 7.52 (t,  $J = 2.0$  Hz, 1H), 7.27 – 7.25 (m, 4H), 7.08 (dt,  $J = 8.7, 2.3$  Hz, 1H), 6.95 – 6.82 (m, 4H), 6.75 (dd,  $J = 8.6, 2.0$  Hz, 1H), 4.31 – 4.18 (m, 1H), 4.06 (m, 1H), 3.87 – 3.73 (m, 8H), 3.65 – 3.36 (m, 5H), 2.48 (s, 1H), 1.40 – 1.30 (m, 1H);  $^{13}\text{C}$  NMR (101 MHz,  $\text{CDCl}_3$ )  $\delta$ : 158.89, 154.78, 131.50, 130.11, 129.66, 128.24, 125.87, 125.50, 118.39, 113.92, 65.92, 62.52, 55.34, 53.46, 52.23, 36.04.  $[\alpha]_{\text{D}}^{23} = +129.4$  ( $c = 2.0$ ,  $\text{CHCl}_3$ ). HPLC analysis (OD-H, 20% IPA in hexanes, 1 mL/min, 220 nm) indicated >99% ee:  $t_{\text{R}}$  (major) = 9.6 min,  $t_{\text{R}}$  (minor) = 13.5 min. HRMS (DART-TOF) calculated for  $\text{C}_{26}\text{H}_{28}\text{ClNO}_4$   $[\text{M}+\text{H}]^+$   $m/z$  454.1780, found 454.1787.

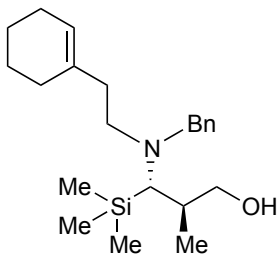

**(2*R*,3*S*)-3-(benzyl(2-(cyclohex-1-en-1-yl)ethyl)amino)-2-methyl-3-(trimethylsilyl)propan-1-ol (31)** was prepared following **General Procedure A**, using (*E*)-2-methyl-3-(trimethylsilyl)prop-2-en-1-ol<sup>3</sup> (72 mg, 0.5 mmol, 1.0 equiv), (MeO)<sub>2</sub>MeSiH (0.25 mL, 2.0 mmol, 4.0 equiv), and 4-(((benzyl(2-(cyclohex-1-en-1-yl)ethyl)amino)oxy)carbonyl)-*N,N*-diethylaniline (**2i**) (305 mg, 0.75 mmol, 1.5 equiv) in THF (0.5 mL), the reaction mixture was stirred at 55 °C for 60 h. The crude product was purified by flash column chromatography (0-70% CH<sub>2</sub>Cl<sub>2</sub> in hexanes) to provide the title compound as a colorless liquid in 77% yield (138 mg). IR (thin film, cm<sup>-1</sup>) 2926, 1251, 1103, 752, 699; <sup>1</sup>H NMR (400 MHz, CDCl<sub>3</sub>) δ: 7.39 – 7.23 (m, 5H), 5.46 – 5.30 (m, 1H), 5.07 (br s, 1H), 3.98 (d, *J* = 12.7 Hz, 1H), 3.75 – 3.50 (m, 2H), 3.36 (dd, *J* = 10.6, 8.1 Hz, 1H), 2.87 – 2.80 (m, 1H), 2.71 – 2.64 (m, 1H), 2.32 (m, 1H), 2.25 – 2.09 (m, 2H), 2.09 – 1.77 (m, 5H), 1.55 (m, 4H), 0.79 (d, *J* = 6.8 Hz, 3H), 0.23 (s, 9H); <sup>13</sup>C NMR (101 MHz, CDCl<sub>3</sub>) δ: 139.14, 135.52, 129.61, 128.54, 127.37, 122.33, 72.25, 60.15, 57.67, 51.51, 37.63, 34.75, 28.59, 25.31, 22.99, 22.46, 16.76, 2.27. [α]<sub>D</sub><sup>23</sup> = 43.3 (c = 2.0, CHCl<sub>3</sub>). HPLC analysis (AD-H, 1% IPA in hexanes, 1 mL/min, 220 nm) indicated >99% ee: t<sub>R</sub> (minor) = 8.5 min, t<sub>R</sub> (major) = 11.6 min. HRMS (DART-TOF) calculated for C<sub>22</sub>H<sub>37</sub>NOSi [M+H]<sup>+</sup> *m/z* 360.2717, found 360.2724.

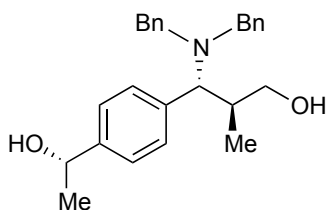

**(2*S*,3*R*)-3-(dibenzylamino)-3-(4-((*S*)-1-hydroxyethyl)phenyl)-2-methylpropan-1-ol (3m)** was prepared following **General Procedure A**, using (*E*)-3-(4-acetylphenyl)-2-methylacrylaldehyde (94 mg, 0.5 mmol, 1.0 equiv), (MeO)<sub>2</sub>MeSiH (0.31 mL, 2.5 mmol, 5.0 equiv), and **2a** (291 mg, 0.6 mmol, 1.5 equiv) in THF (0.5 mL), the reaction mixture was stirred at 55 °C for 60 h. The crude product was purified by flash column chromatography (0-33% EtOAc in hexanes) to provide the title compound as a white foam in 76% yield (148 mg). IR (thin film, cm<sup>-1</sup>) 3340, 2967, 1453, 1028, 733, 698; <sup>1</sup>H NMR (400 MHz, CDCl<sub>3</sub>) δ: 7.49 – 7.13 (m, 14H), 4.93 (q, *J* = 6.4

Hz, 1H), 3.99 (d,  $J = 13.2$  Hz, 2H), 3.82 – 3.72 (m, 1H), 3.60 (d,  $J = 11.0$  Hz, 1H), 3.49 (dd,  $J = 10.9, 8.4$  Hz, 1H), 2.93 (d,  $J = 13.2$  Hz, 2H), 2.67 – 2.61 (m, 1H), 1.55 (d,  $J = 6.5$  Hz, 3H), 0.44 (d,  $J = 6.6$  Hz, 3H);  $^{13}\text{C}$  NMR (101 MHz,  $\text{CDCl}_3$ )  $\delta$ : 145.29, 138.42, 133.19, 130.11, 129.25, 128.68, 127.36, 125.18, 69.82, 69.59, 68.99, 54.10, 33.86, 25.31, 15.38.  $[\alpha]_{\text{D}}^{23} = 186.8$  ( $c = 0.25$ ,  $\text{CHCl}_3$ ). HPLC analysis (AD-H, 10% IPA in hexanes, 1 mL/min, 220 nm) indicated >99% ee:  $t_{\text{R}}$  (minor) = 12.0 min,  $t_{\text{R}}$  (major) = 14.4 min. HRMS (DART-TOF) calculated for  $\text{C}_{26}\text{H}_{31}\text{NO}_2$   $[\text{M}+\text{H}]^+$   $m/z$  390.2428, found 390.2433.

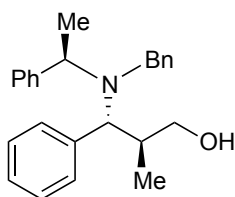

**(2*S*,3*R*)-3-(benzyl(*R*)-1-phenylethyl)amino)-2-methyl-3-phenylpropan-1-ol ((*S,R,R*)-**3n**)** was prepared following **General Procedure A**, using  $\text{Cu}(\text{OAc})_2$  (4.5 mg, 0.025 mmol, 5 mol %), (*S*)-DTBM-SEGPHOS (33.2 mg, 0.0275 mmol, 5.5 mol %), (*E*)-2-methyl-cinnamaldehyde (73 mg, 0.5 mmol, 1.0 equiv),  $(\text{MeO})_2\text{MeSiH}$  (0.25 mL, 2.0 mmol, 4.0 equiv), and (*R*)-4-(((benzyl(1-phenylethyl)amino)oxy)carbonyl)-*N,N*-diethylaniline (**2j**) (242 mg, 0.6 mmol, 1.2 equiv) in THF (0.5 mL), the reaction mixture was stirred at 55 °C for 36 h. The crude product was purified by flash column chromatography (0-10% EtOAc in hexanes) to provide the title compound as a colorless liquid in 65% yield (117 mg) and >20/1 dr. IR (thin film,  $\text{cm}^{-1}$ ) 1493, 1451, 1216, 752, 576;  $^1\text{H}$  NMR (400 MHz,  $\text{CDCl}_3$ )  $\delta$ : 7.51 – 7.18 (m, 15H), 4.41 (d,  $J = 15.3$  Hz, 1H), 3.90 – 3.64 (m, 5H), 3.36 (d,  $J = 15.4$  Hz, 1H), 2.44 – 2.37 (m, 1H), 1.10 (d,  $J = 6.9$  Hz, 3H), 0.51 (d,  $J = 6.7$  Hz, 3H).  $^{13}\text{C}$  NMR (101 MHz,  $\text{CDCl}_3$ )  $\delta$ : 146.05, 142.40, 136.73, 130.11, 128.86, 128.51, 127.99, 127.62, 127.35, 127.18, 126.63, 68.99, 67.83, 62.45, 52.91, 36.15, 24.03, 15.61.  $[\alpha]_{\text{D}}^{23} = 59.2$  ( $c = 2.0$ ,  $\text{CHCl}_3$ ). HRMS (DART-TOF) calculated for  $\text{C}_{25}\text{H}_{29}\text{NO}$   $[\text{M}+\text{H}]^+$   $m/z$  360.2322, found 360.2304.

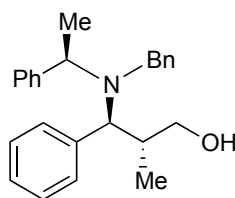

**(2*R*,3*S*)-3-(benzyl(*R*)-1-phenylethylamino)-2-methyl-3-phenylpropan-1-ol ((*R,S,R*)-**3n**)** was prepared following **General Procedure A**, using Cu(OAc)<sub>2</sub> (4.5 mg, 0.025 mmol, 5 mol %), (*R*)-DTBM-SEGPHOS (33.2 mg, 0.0275 mmol, 5.5 mol %), (*E*)-2-methyl-cinnamaldehyde (73 mg, 0.5 mmol, 1.0 equiv), (MeO)<sub>2</sub>MeSiH (0.25 mL, 2.0 mmol, 4.0 equiv), and **2j** (242 mg, 0.6 mmol, 1.2 equiv) in THF (0.5 mL), the reaction mixture was stirred at 55 °C for 36 h. The crude product was purified by flash column chromatography (0-10% EtOAc in hexanes) to provide the title compound as a colorless liquid in 75% yield (135 mg) and >20/1 dr. IR (thin film, cm<sup>-1</sup>) 1486, 1457, 1209, 752 571; <sup>1</sup>H NMR (400 MHz, CDCl<sub>3</sub>) δ: 7.48 – 7.18 (m, 12H), 4.35 – 4.01 (m, 3H), 3.68 – 3.60 (m, 3H), 3.25 (dd, *J* = 10.9, 7.1 Hz, 1H), 2.50 – 2.40 (m, 1H), 0.93 (d, *J* = 7.0 Hz, 3H), 0.43 (d, *J* = 6.7 Hz, 3H); <sup>13</sup>C NMR (101 MHz, CDCl<sub>3</sub>) δ: 143.66, (d, *J* = 1.8 Hz), 129.73, 139.34, 129.43, 128.77, 128.49, 128.33, 128.16, 127.41, 127.34, 127.20, 68.41, 66.65, 55.99, 51.48, 35.81, 15.43, 13.65. [α]<sub>D</sub><sup>23</sup> = -54.3 (c = 2.0, CHCl<sub>3</sub>). HRMS (DART-TOF) calculated for C<sub>25</sub>H<sub>29</sub>NO [M+H]<sup>+</sup> *m/z* 360.2322, found 360.2304.

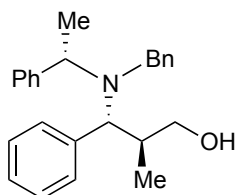

**(2*S*,3*R*)-3-(benzyl(*S*)-1-phenylethylamino)-2-methyl-3-phenylpropan-1-ol ((*S,R,S*)-**3n**)**. was prepared following **General Procedure A**, using Cu(OAc)<sub>2</sub> (4.5 mg, 0.025 mmol, 5 mol %), (*S*)-DTBM-SEGPHOS (33.2 mg, 0.0275 mmol, 5.5 mol %), (*E*)-2-methyl-cinnamaldehyde (73 mg, 0.5 mmol, 1.0 equiv), (MeO)<sub>2</sub>MeSiH (0.25 mL, 2.0 mmol, 4.0 equiv), and (*S*)-4-(((benzyl(1-phenylethylamino)oxy)carbonyl)-*N,N*-diethylaniline (*ent*-**2j**) (242 mg, 0.6 mmol, 1.2 equiv) in THF (0.5 mL), the reaction mixture was stirred at 55 °C for 36 h. The crude product was purified by flash column chromatography (0-10% EtOAc in hexanes) to provide the title compound as a colorless liquid in 76% yield (137 mg) and >20/1 dr. IR (thin film, cm<sup>-1</sup>) 2932, 1494, 1451, 1028, 698; <sup>1</sup>H NMR (400 MHz, CDCl<sub>3</sub>) δ: 7.52 – 7.20 (m, 15H), 4.30 – 4.15 (m, 2H), 3.70 – 3.55 (m, 3H), 3.30 (dd, *J* = 10.9, 6.9 Hz, 1H), 2.47 – 2.38 (m, 1H), 0.92 (d, *J* = 7.0 Hz, 3H), 0.42 (d, *J* = 6.7 Hz, 3H). <sup>13</sup>C NMR (101 MHz, CDCl<sub>3</sub>) δ: 143.55, 139.28, 129.26, 129.55, 129.26, 128.59, 128.32, 128.17, 128.02, 127.23, 127.18, 127.02, 68.08, 66.39, 55.81, 51.28, 35.73, 15.28, 13.47. [α]<sub>D</sub><sup>23</sup> = 51.4 (c = 2.0, CHCl<sub>3</sub>). HRMS (DART-TOF) calculated for C<sub>25</sub>H<sub>29</sub>NO [M+H]<sup>+</sup> *m/z* 360.2322, found 495.2307.

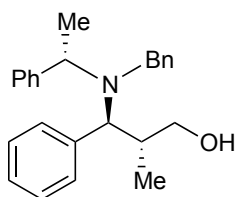

**(2R,3S)-3-(benzyl((S)-1-phenylethyl)amino)-2-methyl-3-phenylpropan-1-ol ((R,S,S)-3n)** was prepared following **General Procedure A**, using  $\text{Cu}(\text{OAc})_2$  (4.5 mg, 0.025 mmol, 5 mol %), (*R*)-DTBM-SEGPPOS (33.2 mg, 0.0275 mmol, 5.5 mol %), (*E*)-2-methyl-cinnamaldehyde (73 mg, 0.5 mmol, 1.0 equiv),  $(\text{MeO})_2\text{MeSiH}$  (0.25 mL, 2.0 mmol, 4.0 equiv), and **ent-2j** (242 mg, 0.6 mmol, 1.2 equiv) in THF (0.5 mL), the reaction mixture was stirred at 55 °C for 36 h. The crude product was purified by flash column chromatography (0-10% EtOAc in hexanes) to provide the title compound as a colorless liquid in 75% yield (135 mg) and >20/1 dr. IR (thin film,  $\text{cm}^{-1}$ ) 2968, 1493, 1451, 732, 698  $^1\text{H}$  NMR (400 MHz,  $\text{CDCl}_3$ )  $\delta$ : 7.50 – 7.14 (m, 15H), 4.38 (d,  $J$  = 15.4 Hz, 1H), 3.93 – 3.57 (m, 5H), 3.33 (d,  $J$  = 15.4 Hz, 1H), 2.41 – 2.34 (m, 1H), 1.07 (d,  $J$  = 6.9 Hz, 3H), 0.48 (d,  $J$  = 6.7 Hz, 3H);  $^{13}\text{C}$  NMR (101 MHz,  $\text{CDCl}_3$ )  $\delta$ : 146.03, 142.40, 136.73, 130.09, 128.83, 128.49, 127.97, 127.84, 127.60, 127.32, 127.15, 126.61, 68.94, 67.78, 62.41, 52.87, 36.14, 24.01, 15.59.  $[\alpha]_{\text{D}}^{23} = -56.1$  ( $c = 2.0$ ,  $\text{CHCl}_3$ ). HRMS (DART-TOF) calculated for  $\text{C}_{25}\text{H}_{29}\text{NO}$   $[\text{M}+\text{H}]^+$   $m/z$  360.2322, found 360.2325.

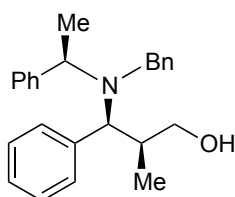

**(2S,3S)-3-(benzyl((R)-1-phenylethyl)amino)-2-methyl-3-phenylpropan-1-ol ((S,S,R)-3n)** was prepared following **General Procedure A**, using  $\text{Cu}(\text{OAc})_2$  (4.5 mg, 0.025 mmol, 5 mol %), (*S*)-DTBM-SEGPPOS (33.2 mg, 0.0275 mmol, 5.5 mol %), (*Z*)-2-methyl-cinnamaldehyde<sup>4,5,6</sup> (73 mg, 0.5 mmol, 1.0 equiv),  $(\text{MeO})_2\text{MeSiH}$  (0.25 mL, 2.0 mmol, 4.0 equiv), and **2j** (242 mg, 0.6 mmol, 1.2 equiv) in THF (0.5 mL), the reaction mixture was stirred at 55 °C for 36 h. The crude product was purified by flash column chromatography (0-10% EtOAc in hexanes) to provide the title compound as a colorless liquid in 64% yield (115 mg) and >20/1 dr. IR (thin film,  $\text{cm}^{-1}$ ) 2967, 1493, 1450, 1027, 699;  $^1\text{H}$  NMR (400 MHz,  $\text{CDCl}_3$ )  $\delta$ : 7.51 – 7.14 (m, 15H), 4.34 (d,  $J$  = 15.8 Hz, 1H), 3.82 (q,  $J$  = 6.9 Hz, 1H), 3.56 (d,  $J$  = 9.7 Hz, 1H), 3.43 (d,  $J$  = 15.8 Hz, 1H), 3.29 (dd,  $J$  = 10.9, 3.8 Hz, 1H), 2.97 (dd,  $J$  = 10.9, 6.4 Hz, 1H), 2.33 – 2.23 (m, 1H), 1.23 (d,  $J$  = 6.6



Hz, 3H), 1.07 (d,  $J = 6.9$  Hz, 3H);  $^{13}\text{C}$  NMR (101 MHz,  $\text{CDCl}_3$ )  $\delta$ : 145.82, 143.66, 138.04, 129.53, 128.40, 128.21, 128.05, 127.93, 127.51, 127.27, 126.79, 126.23, 67.99, 66.26, 61.63, 51.77, 37.85, 23.35, 15.99.  $[\alpha]_{\text{D}}^{23} = 25.1$  ( $c = 2.0$ ,  $\text{CHCl}_3$ ). HRMS (DART-TOF) calculated for  $\text{C}_{25}\text{H}_{29}\text{NO}$   $[\text{M}+\text{H}]^+$   $m/z$  360.2322, found 360.2320.

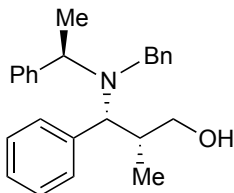

**(2*R*,3*R*)-3-(benzyl(*R*)-1-phenylethyl)amino)-2-methyl-3-phenylpropan-1-ol ((*R,R,R*)-3n)** was prepared following **General Procedure A**, using  $\text{Cu}(\text{OAc})_2$  (4.5 mg, 0.025 mmol, 5 mol %), (*R*)-DTBM-SEGPHOS (33.2 mg, 0.0275 mmol, 5.5 mol %), (*Z*)-2-methyl-cinnamaldehyde (73 mg, 0.5 mmol, 1.0 equiv),  $(\text{MeO})_2\text{MeSiH}$  (0.25 mL, 2.0 mmol, 4.0 equiv), and **2j** (242 mg, 0.6 mmol, 1.2 equiv) in THF (0.5 mL), the reaction mixture was stirred at 55 °C for 36 h. The crude product was purified by flash column chromatography (0-10% EtOAc in hexanes) to provide the title compound as a colorless liquid in 72% yield (130 mg) and >20/1 dr. IR (thin film,  $\text{cm}^{-1}$ ) 2967, 1493, 1451, 1027, 698;  $^1\text{H}$  NMR (400 MHz,  $\text{CDCl}_3$ )  $\delta$ : 7.45 – 7.19 (m, 15H), 4.22 (q,  $J = 6.9$  Hz, 1H), 4.06 (d,  $J = 14.2$  Hz, 1H), 3.62 (d,  $J = 14.2$  Hz, 1H), 3.50 (d,  $J = 9.2$  Hz, 1H), 3.31 (dd,  $J = 10.9, 3.9$  Hz, 1H), 2.94 (dd,  $J = 10.9, 6.5$  Hz, 1H), 2.38 – 2.27 (m, 1H), 1.00 (d,  $J = 6.6$  Hz, 3H), 0.97 (d,  $J = 6.9$  Hz, 3H).  $^{13}\text{C}$  NMR (101 MHz,  $\text{CDCl}_3$ )  $\delta$ : 144.39, 140.97, 140.22, 129.22, 128.86, 128.36, 128.30, 128.12, 128.10, 127.22, 126.87, 126.66, 66.13, 65.94, 55.45, 51.34, 37.55, 15.91, 13.49.  $[\alpha]_{\text{D}}^{23} = -23.6$  ( $c = 1.0$ ,  $\text{CHCl}_3$ ). HRMS (DART-TOF) calculated for  $\text{C}_{31}\text{H}_{30}\text{N}_2\text{O}_2\text{S}$   $[\text{M}+\text{H}]^+$   $m/z$  360.2322, found 360.2313.

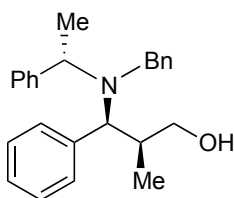

**(2*S*,3*S*)-3-(benzyl(*S*)-1-phenylethyl)amino)-2-methyl-3-phenylpropan-1-ol ((*S,S,S*)-3n)** was prepared following **General Procedure A**, using  $\text{Cu}(\text{OAc})_2$  (4.5 mg, 0.025 mmol, 5 mol %), (*S*)-DTBM-SEGPHOS (33.2 mg, 0.0275 mmol, 5.5 mol %), (*Z*)-2-methyl-cinnamaldehyde (73 mg, 0.5 mmol, 1.0 equiv),  $(\text{MeO})_2\text{MeSiH}$  (0.25 mL, 2.0 mmol, 4.0 equiv), and **ent-2j** (242 mg, 0.6

mmol, 1.2 equiv) in THF (0.5 mL), the reaction mixture was stirred at 55 °C for 36 h. The crude product was purified by flash column chromatography (0-10% EtOAc in hexanes) to provide the title compound as a colorless liquid in 73% yield (131 mg) and >20/1 dr. IR (thin film,  $\text{cm}^{-1}$ ) 2966, 1493, 1451, 1027, 698;  $^1\text{H}$  NMR (400 MHz,  $\text{CDCl}_3$ )  $\delta$ : 7.48 – 7.17 (m, 15H), 4.32 – 4.16 (m, 1H), 4.07 (d,  $J = 14.1$  Hz, 1H), 3.63 (d,  $J = 14.2$  Hz, 1H), 3.50 (d,  $J = 9.3$  Hz, 1H), 3.31 (dd,  $J = 10.8, 3.9$  Hz, 1H), 2.94 (dd,  $J = 10.9, 6.5$  Hz, 1H), 2.39 – 2.29 (m, 1H), 1.31 (br s, 1H), 1.00 (m, 6H);  $^{13}\text{C}$  NMR (101 MHz,  $\text{CDCl}_3$ )  $\delta$ : 144.39, 140.96, 140.21, 129.21, 128.86, 128.35, 128.29, 128.11, 128.09, 127.21, 126.86, 126.65, 66.10, 65.90, 55.44, 51.32, 37.54, 15.90, 13.50.  $[\alpha]_{\text{D}}^{23} = 24.8$  ( $c = 2.0$ ,  $\text{CHCl}_3$ ). HRMS (DART-TOF) calculated for  $\text{C}_{25}\text{H}_{29}\text{NOS}$   $[\text{M}+\text{H}]^+$   $m/z$  360.2322, found 360.2306.

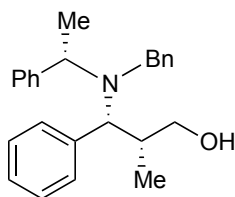

**(2R,3R)-3-(benzyl((S)-1-phenylethyl)amino)-2-methyl-3-phenylpropan-1-ol ((R,R,S)-3n)** was prepared following **General Procedure A**, using  $\text{Cu}(\text{OAc})_2$  (4.5 mg, 0.025 mmol, 5 mol %), (*R*)-DTBM-SEGPHOS (33.2 mg, 0.0275 mmol, 5.5 mol %), (*Z*)-2-methyl-cinnamaldehyde (73 mg, 0.5 mmol, 1.0 equiv),  $(\text{MeO})_2\text{MeSiH}$  (0.25 mL, 2.0 mmol, 4.0 equiv), and **ent-2j** (242 mg, 0.6 mmol, 1.2 equiv) in THF (0.5 mL), the reaction mixture was stirred at 55 °C for 36 h. The crude product was purified by flash column chromatography (0-10% EtOAc in hexanes) to provide the title compound as a colorless liquid in 68% yield (122 mg) and >20/1 dr. IR (thin film,  $\text{cm}^{-1}$ ) 2968, 1492, 1450, 1028, 730;  $^1\text{H}$  NMR (400 MHz,  $\text{CDCl}_3$ )  $\delta$ : 7.49 – 7.11 (m, 15H), 4.32 (d,  $J = 15.9$  Hz, 1H), 3.80 (q,  $J = 6.9$  Hz, 1H), 3.54 (d,  $J = 9.7$  Hz, 1H), 3.41 (d,  $J = 15.9$  Hz, 1H), 3.26 (dd,  $J = 10.9, 3.8$  Hz, 1H), 2.95 (dd,  $J = 10.9, 6.4$  Hz, 1H), 2.31 – 2.21 (m, 1H), 1.21 (d,  $J = 6.6$  Hz, 3H), 1.05 (d,  $J = 6.9$  Hz, 3H);  $^{13}\text{C}$  NMR (101 MHz,  $\text{CDCl}_3$ )  $\delta$ : 145.82, 143.66, 138.04, 129.52, 128.40, 128.21, 128.05, 127.92, 127.50, 127.27, 126.79, 126.22, 67.98, 66.25, 61.63, 51.77, 37.86, 23.36, 15.99.  $[\alpha]_{\text{D}}^{23} = -26.9$  ( $c = 2.0$ ,  $\text{CHCl}_3$ ). HRMS (DART-TOF) calculated for  $\text{C}_{25}\text{H}_{29}\text{NO}$   $[\text{M}+\text{H}]^+$   $m/z$  360.2322, found 360.2331.

#### 4. Copper-Catalyzed Asymmetric Hydrosilylation/Hydroamination of Enones

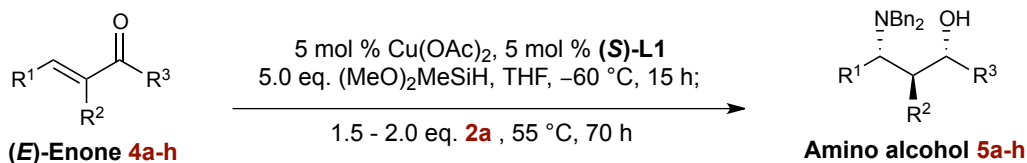

**General Procedure B (one-pot procedure):** An oven-dried screw-cap reaction tube equipped with a magnetic stir bar was charged with  $\text{Cu}(\text{OAc})_2$  (9.0 mg, 0.05 mmol, 5 mol %) and (*S*)-DTBM-SEGPBOS (66.4 mg, 0.055 mmol, 5.5 mol %). The reaction tube was sealed with a screw-cap septum, then evacuated and backfilled with argon (this process was repeated a total of two times). Anhydrous THF (0.3 mL) and  $(\text{MeO})_2\text{MeSiH}$  (0.25 mL, 2.0 mmol, 2.0 equiv) were added sequentially via syringe. The resulting mixture was stirred at rt for 15 min until the color changed from blue to orange. A second oven-dried screw-cap reaction tube equipped with a stir bar was charged with enone substrate **4** (1.0 mmol, 1.0 equiv). The reaction tube was sealed with a screw-cap septum, and then evacuated and backfilled with argon (this process was repeated a total of two times). Anhydrous THF (0.7 mL) and  $(\text{MeO})_2\text{MeSiH}$  (0.37 mL, 3.0 mmol, 3.0 equiv) were added sequentially via syringe at rt. The reaction tube was cooled in a  $-60\text{ }^\circ\text{C}$  cooling bath and the catalyst solution from the first reaction tube was added slowly to the stirred mixture via syringe. After stirring at  $-60\text{ }^\circ\text{C}$  for an additional 15 h, the reaction mixture was allowed to warm to rt and hydroxylamine ester **2a** (1.5 mmol, 1.5 equiv) was then added. The reaction tube was sealed with a screw-cap septum, then evacuated and backfilled with argon (this process was repeated a total of two times). The reaction mixture was stirred at  $55\text{ }^\circ\text{C}$  for 70 h. After completion, the reaction was allowed to cool to ambient temperature, then the solvent was removed *in vacuo* with the aid of a rotary evaporator. A saturated solution of  $\text{NH}_4\text{F}$  in MeOH (5 mL) was added and the mixture was stirred at rt for 10 min, followed by addition of a saturated aqueous solution of  $\text{Na}_2\text{CO}_3$  (10 mL) and EtOAc (20 mL). The phases were separated and the aqueous layer was extracted with EtOAc (2 x 15 mL). The combined organic phases were washed with a saturated aqueous solution of  $\text{Na}_2\text{CO}_3$  (2 x 15 mL) and then concentrated *in vacuo*. The diastereomeric ratio of the crude amino alcohol product **5** was determined by  $^1\text{H-NMR}$  analysis. The crude products were purified by flash column chromatography. The enantiomeric excesses of the products were determined by HPLC analysis using chiral stationary phases as indicated for each substrate.

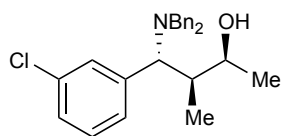

**(2*S*,3*S*,4*R*)-4-(3-chlorophenyl)-4-(dibenzylamino)-3-methylbutan-2-ol (5b)** was prepared following **General Procedure B**, using (*E*)-4-(3-chlorophenyl)-3-methylbut-3-en-2-one<sup>7</sup> (195 mg, 1.0 mmol, 1.0 equiv), (MeO)<sub>2</sub>MeSiH (0.62 mL, 5.0 mmol, 5.0 equiv), and **2a** (583 mg, 1.5 mmol, 1.5 equiv) in THF (1.0 mL), the reaction mixture was stirred at 55 °C for 70 h. The crude product was purified by flash column chromatography (0-10% Et<sub>2</sub>O in hexanes) to provide the title compound as a yellow liquid in 70% yield (276 mg). IR (thin film, cm<sup>-1</sup>) 2972, 1453, 907, 733, 698; <sup>1</sup>H NMR (400 MHz, CDCl<sub>3</sub>) δ: 7.42 – 7.23 (m, 13H), 7.15 (dt, *J* = 7.0, 1.7 Hz, 1H), 4.56 – 4.30 (m, 1H), 3.93 (d, *J* = 13.1 Hz, 2H), 3.78 (d, *J* = 5.8 Hz, 1H), 3.61 (d, *J* = 11.3 Hz, 1H), 2.50 – 2.41 (m, 1H), 0.97 (d, *J* = 6.6 Hz, 3H), 0.48 (d, *J* = 6.7 Hz, 3H); <sup>13</sup>C NMR (101 MHz, CDCl<sub>3</sub>) δ: 138.85, 137.32, 134.30, 130.18, 129.42, 129.40, 128.84, 128.42, 127.76, 127.64, 68.34, 64.49, 53.92, 37.70, 18.68, 12.83. [α]<sub>D</sub><sup>23</sup> = 144.1 (c = 1.0, CHCl<sub>3</sub>). HPLC analysis (IC, 1% IPA in hexanes, 1 mL/min, 220 nm) indicated >99% ee: t<sub>R</sub> (minor) = 7.9 min, t<sub>R</sub> (major) = 11.5 min. HRMS (DART-TOF) calculated for C<sub>25</sub>H<sub>28</sub>ClNO [M+H]<sup>+</sup> *m/z* 394.1932, found 394.1935.

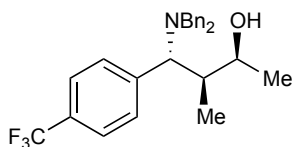

**(2*S*,3*R*)-3-(benzyl(*R*)-1-phenylethyl)amino)-2-methyl-3-phenylpropan-1-ol (5c)** was prepared following **General Procedure B**, using (*E*)-3-methyl-4-(4-(trifluoromethyl)phenyl)but-3-en-2-one<sup>7</sup> (228 mg, 1.0 mmol, 1.0 equiv), (MeO)<sub>2</sub>MeSiH (0.62 mL, 5.0 mmol, 5.0 equiv), and **2a** (583 mg, 1.5 mmol, 1.5 equiv) in THF (1.0 mL), the reaction mixture was stirred at 55 °C for 70 h. The crude product was purified by flash column chromatography (0-10% Et<sub>2</sub>O in hexanes) to provide the title compound as a white solid liquid in 72% yield (306 mg). M.P. 140 – 141 °C; IR (thin film, cm<sup>-1</sup>) 1325, 1119, 1103, 1067, 750; <sup>1</sup>H NMR (400 MHz, CDCl<sub>3</sub>) δ: 7.63 (d, *J* = 8.0 Hz, 2H), 7.33 – 7.15 (m, 12H), 4.50 – 4.29 (m, 1H), 3.87 (d, *J* = 13.1 Hz, 2H), 3.69 – 3.51 (m, 2H), 2.84 (d, *J* = 13.1 Hz, 2H), 2.45 – 2.37 (m, 1H), 0.92 (d, *J* = 6.6 Hz, 3H), 0.39 (d, *J* = 6.8 Hz, 3H); <sup>13</sup>C NMR (101 MHz, CDCl<sub>3</sub>) δ: 139.28 (d, *J* = 1.5 Hz), 138.80, 130.48, 129.79 (q, *J* = 30.3 Hz), 128.88, 127.70, 125.12 (q, *J* = 3.7 Hz), 124.32 (q, *J* = 272.7 Hz), 68.18, 64.47, 53.94, 37.72, 18.79, 12.66. [α]<sub>D</sub><sup>23</sup> = 143.3 (c = 1.0, CHCl<sub>3</sub>). HPLC analysis (IC, 1% IPA in hexanes, 1 mL/min,

220 nm) indicated >99% ee:  $t_R$  (minor) = 6.7 min,  $t_R$  (major) = 10.4 min. Anal. Calcd. for  $C_{26}H_{28}FNO$ : C, 73.05; H, 6.60. Found: C, 73.09; H, 6.62.

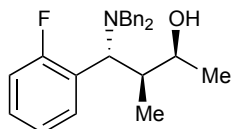

**(2S,3S,4R)-4-(dibenzylamino)-4-(2-fluorophenyl)-3-methylbutan-2-ol (5d)** was prepared following **General Procedure B**, using (*E*)-4-(2-fluorophenyl)-3-methylbut-3-en-2-one (178 mg, 1.0 mmol, 1.0 equiv),  $(MeO)_2MeSiH$  (0.62 mL, 5.0 mmol, 5.0 equiv), and **2a** (583 mg, 1.5 mmol, 1.5 equiv) in THF (1.0 mL), the reaction mixture was stirred at 55 °C for 70 h. The crude product was purified by flash column chromatography (0-10% Et<sub>2</sub>O in hexanes) to provide the title compound as a yellow liquid in 66% yield (249 mg). IR (thin film,  $cm^{-1}$ ) 2972, 1486, 1452, 750, 699; <sup>1</sup>H NMR (400 MHz, CDCl<sub>3</sub>)  $\delta$ : 7.49 – 7.26 (m, 14H), 4.45 (dt,  $J = 6.5, 3.3$  Hz, 1H), 4.19 – 4.04 (m, 4H), 3.08 (dd,  $J = 13.1, 1.7$  Hz, 2H), 2.71 (br s, 1H), 1.00 (d,  $J = 6.6$  Hz, 3H), 0.60 (d,  $J = 6.8$  Hz, 3H); <sup>13</sup>C NMR (101 MHz, CDCl<sub>3</sub>)  $\delta$ : 163.22, 160.79, 139.12, 129.65, 129.27 (d,  $J = 8.6$  Hz), 128.65, 127.54, 123.72 (d,  $J = 3.3$  Hz), 122.53 (d,  $J = 16.0$  Hz), 116.14 (d,  $J = 25.3$  Hz), 69.10, 54.20, 37.47, 18.32, 13.06.  $[\alpha]_D^{23} = 145.2$  ( $c = 2.0$ , CHCl<sub>3</sub>). HPLC analysis (IC, 1% IPA in hexanes, 1 mL/min, 220 nm) indicated >99% ee:  $t_R$  (minor) = 12.6 min,  $t_R$  (major) = 26.2 min. HRMS (DART-TOF) calculated for  $C_{25}H_{28}FNO$   $[M+H]^+$   $m/z$  378.2228, found 378.2218.

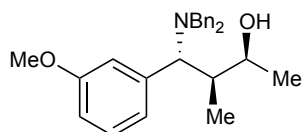

**(2S,3S,4R)-4-(dibenzylamino)-4-(3-methoxyphenyl)-3-methylbutan-2-ol (5e)** was prepared following **General Procedure B**, using (*E*)-4-(3-methoxyphenyl)-3-methylbut-3-en-2-one<sup>7</sup> (190 mg, 1.0 mmol, 1.0 equiv),  $(MeO)_2MeSiH$  (0.62 mL, 5.0 mmol, 5.0 equiv), and **2a** (583 mg, 1.5 mmol, 1.5 equiv) in THF (1.0 mL), the reaction mixture was stirred at 55 °C for 70 h. The crude product was purified by flash column chromatography (0-10% Et<sub>2</sub>O in hexanes) to provide the title compound as a yellow liquid in 71% yield (276 mg). IR (thin film,  $cm^{-1}$ ) 2970, 1492, 1258, 910, 576; <sup>1</sup>H NMR (400 MHz, CDCl<sub>3</sub>)  $\delta$ : 7.50 – 7.25 (m, 11H), 7.01 – 6.80 (m, 3H), 4.43 (s, 1H), 4.23 (s, 1H), 3.97 (d,  $J = 13.2$  Hz, 2H), 3.90 (s, 3H), 3.65 (d,  $J = 11.3$  Hz, 1H), 3.06 (d,  $J = 13.2$

Hz, 2H), 2.58 – 2.49 (m, 1H), 0.98 (d,  $J = 6.5$  Hz, 3H), 0.53 (d,  $J = 6.7$  Hz, 3H);  $^{13}\text{C}$  NMR (101 MHz,  $\text{CDCl}_3$ )  $\delta$ : 159.42, 139.11, 136.63, 129.47, 128.97, 128.72, 127.49, 122.76, 116.78, 112.12, 68.79, 64.76, 55.31, 53.96, 37.59, 18.48, 13.10.  $[\alpha]_{\text{D}}^{23} = 132.8$  ( $c = 2.0$ ,  $\text{CHCl}_3$ ). HPLC analysis (IC, 1% IPA in hexanes, 1 mL/min, 220 nm) indicated >99% ee:  $t_{\text{R}}$  (minor) = 12.6 min,  $t_{\text{R}}$  (major) = 26.2 min. HRMS (DART-TOF) calculated for  $\text{C}_{26}\text{H}_{31}\text{NO}_2$   $[\text{M}+\text{H}]^+$   $m/z$  390.2428, found 390.2408.

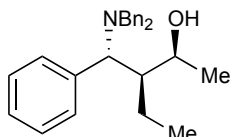

**(2S,3S)-3-((R)-(dibenzylamino)(phenyl)methyl)pentan-2-ol (5f)** was prepared following **General Procedure B**, using (*E*)-3-benzylidenepentan-2-one<sup>7</sup> (174 mg, 1.0 mmol, 1.0 equiv),  $(\text{MeO})_2\text{MeSiH}$  (0.62 mL, 5.0 mmol, 5.0 equiv), and **2a** (583 mg, 1.5 mmol, 1.5 equiv) in THF (1.0 mL), the reaction mixture was stirred at 55 °C for 70 h. The crude product was purified by flash column chromatography (0-10%  $\text{Et}_2\text{O}$  in hexanes) to provide the title compound as a yellow liquid in 62% yield (232 mg). IR (thin film,  $\text{cm}^{-1}$ ) 2967, 1493, 1453, 733, 698;  $^1\text{H}$  NMR (400 MHz,  $\text{CDCl}_3$ )  $\delta$ : 7.53 – 7.21 (m, 15H), 6.17 (d,  $J = 7.6$  Hz, 1H), 4.41 – 4.22 (m, 1H), 3.403 – 3.87 (m, 3H), 2.95 (d,  $J = 13.0$  Hz, 2H), 2.55 – 2.48 (m, 1H), 0.98 – 0.67 (m, 8H);  $^{13}\text{C}$  NMR (101 MHz,  $\text{CDCl}_3$ )  $\delta$ : 138.43, 133.93, 130.50, 129.78, 128.59, 128.01, 127.57, 127.46, 68.44, 64.25, 53.80, 42.61, 22.01, 17.24, 12.37.  $[\alpha]_{\text{D}}^{23} = 120.9$  ( $c = 3.0$ ,  $\text{CHCl}_3$ ). HPLC analysis (IC, 1% IPA in hexanes, 0.5 mL/min, 220 nm) indicated >99% ee:  $t_{\text{R}}$  (major) = 20.0 min,  $t_{\text{R}}$  (minor) = 24.0 min. HRMS (DART-TOF) calculated for  $\text{C}_{26}\text{H}_{31}\text{NO}$   $[\text{M}+\text{H}]^+$   $m/z$  374.2478, found 374.2469.

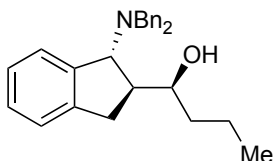

**(S)-1-((1R,2S)-1-(dibenzylamino)-2,3-dihydro-1H-inden-2-yl)butan-1-ol (5g)** was prepared following **General Procedure B**, using 1-(1*H*-inden-2-yl)butan-1-one (186 mg, 1.0 mmol, 1.0 equiv),  $(\text{MeO})_2\text{MeSiH}$  (0.62 mL, 5.0 mmol, 5.0 equiv), and **2a** (583 mg, 1.5 mmol, 1.5 equiv) in THF (1.0 mL), the reaction mixture was stirred at 55 °C for 70 h. The crude product was purified by flash column chromatography (0-10%  $\text{CH}_2\text{Cl}_2$  in hexanes) to provide the title compound as a yellow liquid in 67% yield (258 mg) with 10/1 dr. IR (thin film,  $\text{cm}^{-1}$ ) 2927, 1453, 1126, 909,

732, 697; <sup>1</sup>H NMR (400 MHz, CDCl<sub>3</sub>) δ: 7.54 – 7.13 (m, 14H), 4.41 (d, *J* = 7.4 Hz, 1H), 3.97 – 3.47 (m, 5H), 2.87 – 2.72 (m, 2H), 2.63 – 2.57 (m, 1H), 1.85 – 1.58 (m, 1H), 1.53 – 1.39 (m, 1H), 1.39 – 1.12 (m, 3H), 0.90 (t, *J* = 6.9 Hz, 3H); <sup>13</sup>C NMR (101 MHz, CDCl<sub>3</sub>) δ: 143.20, 143.07, 140.17, 129.34, 129.00, 128.40, 127.40, 127.12, 126.18, 125.07, 72.04, 65.18, 54.86, 47.03, 37.09, 30.72, 19.61, 14.14. [α]<sub>D</sub><sup>23</sup> = –128.2 (c = 3.0, CHCl<sub>3</sub>). HPLC analysis (IA, 20% IPA in hexanes, 0.5 mL/min, 220 nm) indicated >99% ee: t<sub>R</sub> (major) = 8.9 min, t<sub>R</sub> (minor) = 11.8 min. HRMS (DART-TOF) calculated for C<sub>27</sub>H<sub>31</sub>NO [M+H]<sup>+</sup> *m/z* 386.2478, found 386.2451.

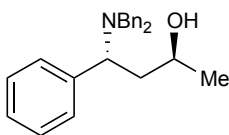

**(2*S*,4*R*)-4-(dibenzylamino)-4-phenylbutan-2-ol ((*S,R*)-5h)** was prepared following **General Procedure B**, using (*E*)-4-phenylbut-3-en-2-one (219 mg, 1.5 mmol, 1.5 equiv), (MeO)<sub>2</sub>MeSiH (0.62 mL, 5.0 mmol, 5.0 equiv), and **2a** (388 mg, 1.0 mmol, 1.0 equiv) in THF (1.0 mL), the reaction mixture was stirred at 55 °C for 70 h. The crude product was purified by flash column chromatography (0-10% Et<sub>2</sub>O in hexanes) to provide the title compounds as yellow liquids in 72% yield for (*S,R*)-5h (249 mg) and 10% yield for (*R,R*)-5h (35 mg).

For (*S,R*)-5h: IR (thin film, cm<sup>-1</sup>) 1493, 1452, 1073, 747, 697; <sup>1</sup>H NMR (400 MHz, CDCl<sub>3</sub>) δ: 7.56 – 7.30 (m, 15H), 4.35 – 4.27 (m, 1H), 4.12 (dd, *J* = 10.8, 4.7 Hz, 1H), 4.00 (d, *J* = 13.4 Hz, 2H), 3.38 (br s, 1H), 3.16 (d, *J* = 13.4 Hz, 2H), 2.56 – 2.49 (m, 1H), 1.76 – 1.69 (m, 1H), 1.18 (d, *J* = 6.3 Hz, 3H); <sup>13</sup>C NMR (101 MHz, CDCl<sub>3</sub>) δ: 139.48, 137.20, 129.32, 129.12, 128.53, 128.09, 127.46, 127.23, 65.36, 57.98, 53.55, 39.38, 22.72. [α]<sub>D</sub><sup>23</sup> = 125.4 (c = 5.0, CHCl<sub>3</sub>). HPLC analysis (IC, 1% IPA in hexanes, 0.5 mL/min, 220 nm) indicated >99% ee: t<sub>R</sub> (major) = 29.6 min, t<sub>R</sub> (minor) = 31.0 min. HRMS (DART-TOF) calculated for C<sub>24</sub>H<sub>27</sub>NO [M+H]<sup>+</sup> *m/z* 346.2165, found 346.2147.

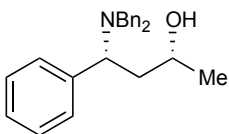

**(2*R*,4*R*)-4-(dibenzylamino)-4-phenylbutan-2-ol ((*R,R*)-5h).**

For (*R,R*)-5h: IR (thin film, cm<sup>-1</sup>) 1452, 1215, 1136, 744, 690; <sup>1</sup>H NMR (400 MHz, CDCl<sub>3</sub>) δ: 7.46 – 7.24 (m, 15H), 6.29 (br s, 1H), 4.10 – 4.04 (m, 3H), 3.93 – 3.75 (m, 1H), 2.97 (d, *J* = 13.2 Hz, 2H), 2.46 – 2.37 (m, 1H), 1.56 (d, *J* = 14.5 Hz, 1H), 1.20 (d, *J* = 6.1 Hz, 3H); <sup>13</sup>C NMR (101 MHz, CDCl<sub>3</sub>) δ: 138.45, 136.19, 129.49, 129.38, 128.78, 128.24, 127.81, 127.45, 69.20, 53.91,

39.09, 23.67.  $[\alpha]_D^{23} = 108.9$  ( $c = 1.0$ ,  $\text{CHCl}_3$ ). HPLC analysis (IC, 1% IPA in hexanes, 0.5 mL/min, 220 nm) indicated >99% ee:  $t_R$  (major) = 25.8 min,  $t_R$  (minor) = 28.0 min. HRMS (DART-TOF) calculated for  $\text{C}_{24}\text{H}_{27}\text{NO}$   $[\text{M}+\text{H}]^+$   $m/z$  346.2165, found 346.2158.

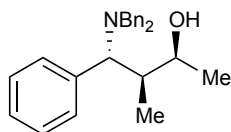

**(2S,3S,4R)-4-(dibenzylamino)-3-methyl-4-phenylbutan-2-ol ((S,S,R)-5a)** was prepared following **General Procedure B**, using  $\text{Cu}(\text{OAc})_2$  (9.0 mg, 0.05 mmol, 5 mol %), (*S*)-DTBM-SEGPHOS (66.4 mg, 0.055 mmol, 5.5 mol %), (*E*)-3-methyl-4-phenylbut-3-en-2-one<sup>7</sup> (160 mg, 1.0 mmol, 1.0 equiv),  $(\text{MeO})_2\text{MeSiH}$  (0.62 mL, 5.0 mmol, 5.0 equiv), and **2a** (583 mg, 1.5 mmol, 1.5 equiv) in THF (1.0 mL), the reaction mixture was stirred at 55 °C for 70 h. The crude product was purified by flash column chromatography (0-10%  $\text{Et}_2\text{O}$  in hexanes) to provide the title compound as white foam in 76% yield (273 mg). IR (thin film,  $\text{cm}^{-1}$ ) 2972, 1452, 907, 731, 698;  $^1\text{H}$  NMR (400 MHz,  $\text{CDCl}_3$ )  $\delta$ : 7.44 – 7.04 (m, 15H), 4.44 – 4.01 (m, 2H), 3.87 (d,  $J = 13.2$  Hz, 2H), 3.59 (d,  $J = 11.3$  Hz, 1H), 2.91 (d,  $J = 13.2$  Hz, 2H), 2.50 – 2.43 (m, 1H), 0.87 (d,  $J = 6.5$  Hz, 3H), 0.40 (d,  $J = 6.8$  Hz, 3H);  $^{13}\text{C}$  NMR (101 MHz,  $\text{CDCl}_3$ )  $\delta$ : 139.09, 134.95, 130.40, 129.54, 128.75, 128.12, 127.57, 127.53, 69.00, 64.80, 53.94, 37.52, 18.43, 13.31.  $[\alpha]_D^{23} = 125.0$  ( $c = 3.0$ ,  $\text{CHCl}_3$ ). HPLC analysis (IC, 1% IPA in hexanes, 0.5 mL/min, 220 nm) indicated >99% ee:  $t_R$  (minor) = 21.0 min,  $t_R$  (major) = 30.7 min. HRMS (DART-TOF) calculated for  $\text{C}_{25}\text{H}_{29}\text{NO}$   $[\text{M}+\text{H}]^+$   $m/z$  360.2322, found 360.2321.

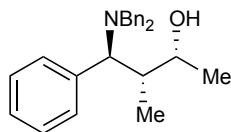

**(2R,3R,4S)-4-(dibenzylamino)-3-methyl-4-phenylbutan-2-ol ((R,R,S)-5a)** was prepared following **General Procedure B**, using  $\text{Cu}(\text{OAc})_2$  (9.0 mg, 0.05 mmol, 5 mol %), (*R*)-DTBM-SEGPHOS (66.4 mg, 0.055 mmol, 5.5 mol %), (*E*)-3-methyl-4-phenylbut-3-en-2-one (160 mg, 1.0 mmol, 1.0 equiv),  $(\text{MeO})_2\text{MeSiH}$  (0.62 mL, 5.0 mmol, 5.0 equiv), and **2a** (583 mg, 1.5 mmol, 1.5 equiv) in THF (1.0 mL), the reaction mixture was stirred at 55 °C for 70 h. The crude product was purified by flash column chromatography (0-10%  $\text{Et}_2\text{O}$  in hexanes) to provide the title compound as a yellow liquid in 75% yield (269 mg). IR (thin film,  $\text{cm}^{-1}$ ) 2972, 1452, 907, 731, 698;  $^1\text{H}$  NMR (400 MHz,  $\text{CDCl}_3$ )  $\delta$ : 7.44 – 7.32 (m, 11H), 7.29 – 7.22 (m, 4H), 4.50 – 4.20



(m, 2H), 3.93 (d,  $J = 13.1$  Hz, 2H), 3.66 (d,  $J = 11.3$  Hz, 1H), 2.97 (d,  $J = 13.1$  Hz, 2H), 2.58 – 2.49 (m, 1H), 0.93 (d,  $J = 6.4$  Hz, 3H), 0.46 (d,  $J = 6.8$  Hz, 3H);  $^{13}\text{C}$  NMR (101 MHz,  $\text{CDCl}_3$ )  $\delta$ : 139.04, 134.89, 130.32, 129.47, 128.69, 128.06, 127.51, 127.46, 68.93, 64.72, 53.88, 37.45, 18.40, 13.26.  $[\alpha]_{\text{D}}^{23} = -123.1$  ( $c = 3.0$ ,  $\text{CHCl}_3$ ). HPLC analysis (IC, 1% IPA in hexanes, 0.5 mL/min, 220 nm) indicated >99% ee:  $t_{\text{R}}$  (major) = 21.0 min,  $t_{\text{R}}$  (minor) = 30.7 min. HRMS (DART-TOF) calculated for  $\text{C}_{25}\text{H}_{29}\text{NO}$   $[\text{M}+\text{H}]^+$   $m/z$  360.2322, found 360.2308.

### Two-Step Ligand-Switch Procedure

**General Procedure C (for 1,2-reduction):** An oven-dried screw-cap reaction tube equipped with a magnetic stir bar was charged with  $\text{Cu}(\text{OAc})_2$  (9.0 mg, 0.05 mmol, 5 mol %) and (*S*)-DTBM-SEGPHOS (66.4 mg, 0.055 mmol, 5.5 mol %). The reaction tube was sealed with a screw-cap septum, then evacuated and backfilled with argon (this process was repeated a total of two times). Anhydrous THF (0.3 mL) and  $(\text{MeO})_2\text{MeSiH}$  (0.37 mL, 3.0 mmol, 3.0 equiv) were added sequentially via syringe. The resulting mixture was stirred at rt for 15 min until the color changed from blue to orange. A second oven-dried screw-cap reaction tube equipped with a stir bar was charged with enone substrate **4** (1.0 mmol, 1.0 equiv). The reaction tube was sealed with a screw-cap septum, and then evacuated and backfilled with argon (this process was repeated a total of two times). Anhydrous THF (0.7 mL) were added via syringe at rt and then immersed into a cooling bath at  $-60$  °C. The catalyst solution from the first reaction tube was then added slowly to the stirred mixture via syringe. After stirring at  $-60$  °C for an additional 15 h, the reaction mixture was quenched at  $-60$  °C by addition of a saturated aqueous solution of  $\text{Na}_2\text{CO}_3$  (10 mL) then allowed to warm to rt and the solvent was removed *in vacuo* with the aid of a rotary evaporator. A saturated solution of  $\text{NH}_4\text{F}$  in MeOH (3 mL) was added and the mixture was stirred at rt for 10 min followed by addition of a saturated aqueous solution of  $\text{Na}_2\text{CO}_3$  (10 mL) and EtOAc (20 mL). The phases were separated and the aqueous layer was extracted with EtOAc (2 x 10 mL). The combined organic phases were washed with a saturated aqueous solution of  $\text{Na}_2\text{CO}_3$  (2 x 10 mL) and then concentrated *in vacuo*. The crude allylic alcohols were purified by flash column chromatography. The enantiomeric excesses of the products were determined by HPLC analysis using chiral stationary phases as indicated for each substrate.

**General Procedure D (for hydroamination):** An oven-dried screw-cap reaction tube equipped with a magnetic stir bar was charged with  $\text{Cu}(\text{OAc})_2$  (4.5 mg, 0.025 mmol, 5 mol %) and (*R*)-DTBM-SEGPHOS (33.2 mg, 0.0275 mmol, 5.5 mol %). The reaction tube was sealed with a screw-cap septum, then evacuated and backfilled with argon (this process was repeated a total of

two times). Anhydrous THF (0.5 mL) and  $(\text{MeO})_2\text{MeSiH}$  (0.31 mL, 2.5 mmol, 5.0 equiv) were added sequentially via syringe. The resulting mixture was stirred at rt for 15 min until the color changed from blue to orange. A second oven-dried screw-cap reaction tube equipped with a stir bar was charged with allylic alcohol intermediate (0.5 mmol, 1.0 equiv) and hydroxylamine ester **2a** (1.0 mmol, 2.0 equiv). The reaction tube was sealed with a screw-cap septum, and then evacuated and backfilled with argon (this process was repeated a total of two times). The catalyst solution from the first reaction tube was then added slowly to the stirred mixture at rt via syringe. After stirring at rt for 15 min, the reaction mixture was then stirred at 55 °C for 70 h. After cooling to room temperature, the solvent was removed *in vacuo* with the aid of a rotary evaporator. A saturated solution of  $\text{NH}_4\text{F}$  in MeOH (3 mL) was added and the mixture was stirred at rt for 10 min, followed by addition of a saturated aqueous solution of  $\text{Na}_2\text{CO}_3$  (10 mL) and EtOAc (20 mL). The phases were separated and the aqueous layer was extracted with EtOAc (2 x 10 mL). The combined organic phases were washed with a saturated aqueous solution of  $\text{Na}_2\text{CO}_3$  (2 x 10 mL) and then concentrated *in vacuo*. The crude products were purified by flash column chromatography. The enantiomeric excesses of the products were determined by HPLC analysis using chiral stationary phases as indicated for each substrate.

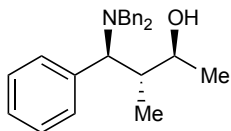

**(2*S*,3*R*,4*S*)-4-(dibenzylamino)-3-methyl-4-phenylbutan-2-ol ((*S,R,S*)-5a)** was prepared following **General Procedure C** (for 1,2-reduction), using  $\text{Cu}(\text{OAc})_2$  (18.0 mg, 0.1 mmol, 5 mol %) and (*S*)-**DTBM-SEGPHOS** (133.0 mg, 0.11 mmol, 5.5 mol %), (*E*)-3-methyl-4-phenylbut-3-en-2-one (320 mg, 2.0 mmol, 1.0 equiv),  $(\text{MeO})_2\text{MeSiH}$  (0.74 mL, 6.0 mmol, 3.0 equiv), the reaction mixture was stirred at -60 °C for 15 h. The crude product was purified by flash column chromatography (0-15% EtOAc in hexanes) to provide (*S,E*)-3-methyl-4-phenylbut-3-en-2-ol<sup>8</sup> as a colorless liquid in 99% yield (321 mg).  $[\alpha]_D^{23} = -13.5$  ( $c = 1.0$ ,  $\text{CHCl}_3$ ). HPLC analysis (IC, 5% IPA in hexanes, 1 mL/min, 220 nm) indicated 92% ee:  $t_R$  (major) = 7.2 min,  $t_R$  (minor) = 8.5 min. Following **General Procedure D** (for hydroamination), using  $\text{Cu}(\text{OAc})_2$  (4.5 mg, 0.025 mmol, 5 mol %) and (*R*)-**DTBM-SEGPHOS** (33.2 mg, 0.0275 mmol, 5.5 mol %), (*R,E*)-3-methyl-4-phenylbut-3-en-2-ol (81 mg, 0.5 mmol, 1.0 equiv),  $(\text{MeO})_2\text{MeSiH}$  (0.31 mL, 2.5 mmol, 5.0 equiv), the reaction mixture was stirred at 55 °C for 70 h. The diastereomeric ratio was determined to 13/1 via <sup>1</sup>H NMR analysis of the crude sample. The crude product was purified by

flash column chromatography (0-10% Et<sub>2</sub>O in hexanes) to provide the title compound as white foam in 60% yield (108 mg). IR (thin film, cm<sup>-1</sup>) 2972, 1736, 1452, 747, 697; <sup>1</sup>H NMR (400 MHz, CDCl<sub>3</sub>) δ: 8.08 (br s, 1H), 7.56 – 7.10 (m, 15H), 4.29 – 3.88 (m, 2H), 3.73 (d, *J* = 11.1 Hz, 1H), 3.61 – 3.56 (m, 1H), 2.96 (d, *J* = 13.2 Hz, 2H), 2.49 – 2.23 (m, 1H), 1.25 (d, *J* = 6.0 Hz, 3H), 0.45 (d, *J* = 6.6 Hz, 3H); <sup>13</sup>C NMR (101 MHz, CDCl<sub>3</sub>) δ: 137.82, 133.93, 130.35, 129.45, 128.83, 128.21, 127.76, 127.55, 74.19, 70.14, 54.34, 38.99, 21.98, 15.27. [α]<sub>D</sub><sup>23</sup> = -123.1 (c = 3.0, CHCl<sub>3</sub>). HPLC analysis (IC, 1% IPA in hexanes, 0.5 mL/min, 220 nm) indicated >99% ee: t<sub>R</sub> (minor) = 26.5 min, t<sub>R</sub> (major) = 28.3 min. HRMS (DART-TOF) calculated for C<sub>25</sub>H<sub>29</sub>NO [M+H]<sup>+</sup> *m/z* 360.2322, found 360.2306.

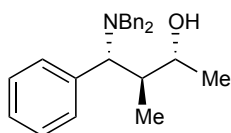

**(2*R*,3*S*,4*R*)-4-(dibenzylamino)-3-methyl-4-phenylbutan-2-ol ((*R,S,R*)-5a).**

Following **General Procedure C** (for 1,2-reduction), using Cu(OAc)<sub>2</sub> (18.0 mg, 0.1 mmol, 5 mol %) and (*R*)-DTBM-SEGPHOS (133.0 mg, 0.11 mmol, 5.5 mol %), (*E*)-3-methyl-4-phenylbut-3-en-2-one (320 mg, 2.0 mmol, 1.0 equiv), (MeO)<sub>2</sub>MeSiH (0.74 mL, 6.0 mmol, 3.0 equiv), the reaction mixture was stirred at -60 °C for 15 h. The crude product was purified by flash column chromatography (0-15% EtOAc in hexanes) to provide (*R,E*)-3-methyl-4-phenylbut-3-en-2-ol<sup>8</sup> as a colorless liquid in 99% yield (321 mg). [α]<sub>D</sub><sup>23</sup> = 13.5 (c = 2.0, CHCl<sub>3</sub>). HPLC analysis (IC, 5% IPA in hexanes, 1 mL/min, 220 nm) indicated 92% ee: t<sub>R</sub> (minor) = 7.2 min, t<sub>R</sub> (major) = 8.5 min. Following **General Procedure D** (for hydroamination), using Cu(OAc)<sub>2</sub> (4.5 mg, 0.025 mmol, 5 mol %) and (*S*)-DTBM-SEGPHOS (33.2 mg, 0.0275 mmol, 5.5 mol %), (*R,E*)-3-methyl-4-phenylbut-3-en-2-ol (81 mg, 0.5 mmol, 1.0 equiv), (MeO)<sub>2</sub>MeSiH (0.31 mL, 2.5 mmol, 5.0 equiv), the reaction mixture was stirred at 55 °C for 70 h. The diastereomeric ratio was determined to 13/1 via <sup>1</sup>H NMR analysis of the crude sample. The crude product was purified by flash column chromatography (0-10% Et<sub>2</sub>O in hexanes) to provide the title compound as white foam in 61% yield (110 mg). IR (thin film, cm<sup>-1</sup>) 2971, 1494, 1452, 1125, 697; <sup>1</sup>H NMR (400 MHz, CDCl<sub>3</sub>) δ: 7.93 (br s, 1H), 7.51 – 7.15 (m, 15H), 4.05 (d, *J* = 13.2 Hz, 2H), 3.69 (d, *J* = 11.1 Hz, 1H), 3.62 – 3.55 (m, 1H), 2.93 (d, *J* = 13.2 Hz, 2H), 2.39 – 2.20 (m, 1H), 1.23 (d, *J* = 6.1 Hz, 3H), 0.43 (d, *J* = 6.6 Hz, 3H); <sup>13</sup>C NMR (101 MHz, CDCl<sub>3</sub>) δ: 138.11, 134.12, 130.29, 129.41, 128.75, 128.13, 127.62, 127.43, 74.14, 69.99, 54.32, 39.03, 21.91, 15.22. [α]<sub>D</sub><sup>23</sup> = 123.6 (c = 3.0, CHCl<sub>3</sub>). HPLC analysis (IC, 1% IPA in hexanes, 0.5 mL/min, 220 nm) indicated >99% ee: t<sub>R</sub>

(major) = 26.5 min,  $t_R$  (minor) = 28.3 min. HRMS (DART-TOF) calculated for  $C_{25}H_{29}NO$   $[M+H]^+$   $m/z$  360.2322, found 360.2323.

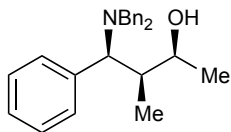

**(2S,3S,4S)-4-(dibenzylamino)-3-methyl-4-phenylbutan-2-ol ((S,S,S)-5a).**

Following **General Procedure C** (for 1,2-reduction), using  $Cu(OAc)_2$  (9.0 mg, 0.05 mmol, 5 mol %), (*S*)-DTBM-SEGPHOS (66.4 mg, 0.055 mmol, 5.5 mol %), (*Z*)-3-methyl-4-phenylbut-3-en-2-one<sup>9, 10</sup> (160 mg, 1.0 mmol, 1.0 equiv),  $(MeO)_2MeSiH$  (0.37 mL, 3.0 mmol, 3.0 equiv), the reaction mixture was stirred at  $-78$  °C for 24 h. The crude product was purified by flash column chromatography (0-15% EtOAc in hexanes) to provide (*S,Z*)-3-methyl-4-phenylbut-3-en-2-ol as a white solid in 91% yield (147 mg). M.P. 44 – 45 °C; IR (thin film,  $cm^{-1}$ ) 2972, 1735, 1453, 748, 695;  $^1H$  NMR (400 MHz,  $CDCl_3$ )  $\delta$ : 7.35 (m, 2H), 7.26 – 7.20 (m, 1H), 7.18 – 7.16 (m, 2H), 6.37 (s, 1H), 4.88 (q,  $J = 6.5$  Hz, 1H), 1.92 (d,  $J = 1.6$  Hz, 3H), 1.64 (s, 1H), 1.34 (d,  $J = 6.5$  Hz, 3H);  $^{13}C$  NMR (101 MHz,  $CDCl_3$ )  $\delta$ : 141.21, 137.38, 128.77, 128.26, 126.97, 126.57, 65.64, 21.40, 17.29.  $[\alpha]_D^{23} = 84.9$  ( $c = 1.0$ ,  $CHCl_3$ ). HPLC analysis (IC, 5% IPA in hexanes, 1 mL/min, 220 nm) indicated 89% ee:  $t_R$  (minor) = 6.2 min,  $t_R$  (major) = 8.2 min. HRMS (DART-TOF) calculated for  $C_{11}H_{14}O$   $[M+H]^+$   $m/z$  161.0961, found 161.0961.

Following **General Procedure D** (for hydroamination), using  $Cu(OAc)_2$  (1.8 mg, 0.01 mmol, 10 mol %) and (*S*)-DM-SEGPHOS (8.0 mg, 0.011 mmol, 11 mol %), (*R,Z*)-3-methyl-4-phenylbut-3-en-2-ol (16 mg, 0.1 mmol, 1.0 equiv),  $(MeO)_2MeSiH$  (0.13 mL, 1.0 mmol, 10.0 equiv), the reaction mixture was stirred at 65 °C for 70 h. The diastereomeric ratio was determined to 7/1 via  $^1H$  NMR analysis of the crude sample. The crude product was purified via preparative TLC (20% EtOAc in hexanes) to provide the title compound as a colorless liquid in 36% yield (13 mg). IR (thin film,  $cm^{-1}$ ) 2972, 1735, 1453, 748, 695;  $^1H$  NMR (400 MHz,  $CDCl_3$ )  $\delta$ : 7.35 – 7.22 (m, 10H), 7.20 – 7.11 (m, 5H), 3.85 (d,  $J = 14.0$  Hz, 2H), 3.48 – 3.34 (m, 1H), 3.35 (d,  $J = 9.6$  Hz, 1H), 3.05 (d,  $J = 14.0$  Hz, 2H), 2.62 – 2.51 (m, 1H), 1.03 (d,  $J = 6.7$  Hz, 3H), 0.79 (d,  $J = 6.2$  Hz, 3H);  $^{13}C$  NMR (101 MHz,  $CDCl_3$ )  $\delta$ : 139.11, 135.91, 129.59, 128.91, 128.31, 128.10, 127.35, 126.90, 68.79, 66.57, 53.28, 39.65, 17.76, 11.79.  $[\alpha]_D^{23} = 100.5$  ( $c = 0.1$ ,  $CHCl_3$ ). HPLC analysis (IC, 1% IPA in hexanes, 0.5 mL/min, 220 nm) indicated >99% ee:  $t_R$  (major) = 15.7 min,  $t_R$  (minor) = 24.8 min. HRMS (DART-TOF) calculated for  $C_{25}H_{29}NO$   $[M+H]^+$   $m/z$  360.2322, found 360.2322.

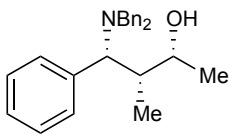

**(2*R*,3*R*,4*R*)-4-(dibenzylamino)-3-methyl-4-phenylbutan-2-ol ((*R,R,R*)-5a).**

Following **General Procedure C** (for 1,2-reduction), using  $\text{Cu}(\text{OAc})_2$  (9.0 mg, 0.05 mmol, 5 mol %), (*R*)-DTBM-SEGPHOS (66.4 mg, 0.055 mmol, 5.5 mol %), (*Z*)-3-methyl-4-phenylbut-3-en-2-one (160 mg, 1.0 mmol, 1.0 equiv),  $(\text{MeO})_2\text{MeSiH}$  (0.37 mL, 3.0 mmol, 3.0 equiv), the reaction mixture was stirred at  $-78\text{ }^\circ\text{C}$  for 24 h. The crude product was purified by flash column chromatography (0-15% EtOAc in hexanes) to provide (*R,Z*)-3-methyl-4-phenylbut-3-en-2-ol as a white solid in 91% yield (147 mg). M.P.  $44 - 45\text{ }^\circ\text{C}$ ; IR (thin film,  $\text{cm}^{-1}$ ) 2972, 1735, 1453, 748, 695;  $^1\text{H}$  NMR (400 MHz,  $\text{CDCl}_3$ )  $\delta$ : 7.33 (dd,  $J = 8.1, 6.7\text{ Hz}$ , 2H), 7.26 – 7.20 (m, 1H), 7.17 (dd,  $J = 7.6, 1.4\text{ Hz}$ , 2H), 6.37 (s, 1H), 4.88 (q,  $J = 6.5\text{ Hz}$ , 1H), 1.92 (d,  $J = 1.6\text{ Hz}$ , 3H), 1.64 (s, 1H), 1.34 (d,  $J = 6.5\text{ Hz}$ , 3H);  $^{13}\text{C}$  NMR (101 MHz,  $\text{CDCl}_3$ )  $\delta$ : 141.21, 137.38, 128.77, 128.26, 126.97, 126.57, 65.64, 21.40, 17.29.  $[\alpha]_D^{23} = -84.1$  ( $c = 1.0$ ,  $\text{CHCl}_3$ ). HPLC analysis (IC, 5% IPA in hexanes, 1 mL/min, 220 nm) indicated 89% ee:  $t_R$  (major) = 6.2 min,  $t_R$  (minor) = 8.2 min. HRMS (DART-TOF) calculated for  $\text{C}_{11}\text{H}_{14}\text{O}$   $[\text{M}-\text{H}]^+$   $m/z$  161.0961, found 161.0961.

Following **General Procedure D** (for hydroamination), using  $\text{Cu}(\text{OAc})_2$  (1.8 mg, 0.01 mmol, 10 mol %) and (*R*)-DM-SEGPHOS (8.0 mg, 0.011 mmol, 11 mol %), (*R,Z*)-3-methyl-4-phenylbut-3-en-2-ol (16 mg, 0.1 mmol, 1.0 equiv),  $(\text{MeO})_2\text{MeSiH}$  (0.13 mL, 1.0 mmol, 10.0 equiv), the reaction mixture was stirred at  $65\text{ }^\circ\text{C}$  for 70 h. The diastereomeric ratio was determined to 7/1 via  $^1\text{H}$  NMR analysis of the crude sample. The crude product was purified via preparative TLC (20% EtOAc in hexanes) to provide the title compound as a colorless liquid in 36% yield (13 mg). IR (thin film,  $\text{cm}^{-1}$ ) 2973, 1734, 1452, 748, 696;  $^1\text{H}$  NMR (400 MHz,  $\text{CDCl}_3$ )  $\delta$ : 7.32 – 7.10 (m, 15H), 3.83 (d,  $J = 14.0\text{ Hz}$ , 2H), 3.49 – 3.38 (m, 1H), 3.33 (d,  $J = 9.5\text{ Hz}$ , 1H), 3.03 (d,  $J = 14.0\text{ Hz}$ , 2H), 2.59 – 2.49 (m, 1H), 1.50 (s, 1H), 1.01 (d,  $J = 6.7\text{ Hz}$ , 3H), 0.77 (d,  $J = 6.3\text{ Hz}$ , 3H);  $^{13}\text{C}$  NMR (101 MHz,  $\text{CDCl}_3$ )  $\delta$ : 139.26, 136.06, 129.74, 129.06, 128.46, 128.24, 127.50, 127.05, 68.95, 66.72, 53.42, 39.80, 17.91, 11.94.  $[\alpha]_D^{23} = -101.0$  ( $c = 1.0$ ,  $\text{CHCl}_3$ ). HPLC analysis (IC, 1% IPA in hexanes, 0.5 mL/min, 220 nm) indicated >99% ee:  $t_R$  (minor) = 15.7 min,  $t_R$  (major) = 24.8 min. HRMS (DART-TOF) calculated for  $\text{C}_{25}\text{H}_{29}\text{NO}$   $[\text{M}+\text{H}]^+$   $m/z$  360.2322, found 360.2318.

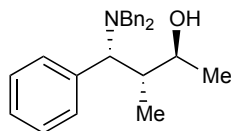

**(2*S*,3*R*,4*R*)-4-(dibenzylamino)-3-methyl-4-phenylbutan-2-ol ((*S*,*R*,*R*)-5a).**

Following **General Procedure C** (for 1,2-reduction), using  $\text{Cu}(\text{OAc})_2$  (9.0 mg, 0.05 mmol, 5 mol %), (*S*)-DTBM-SEGPHOS (66.4 mg, 0.055 mmol, 5.5 mol %), (*Z*)-3-methyl-4-phenylbut-3-en-2-one (160 mg, 1.0 mmol, 1.0 equiv),  $(\text{MeO})_2\text{MeSiH}$  (0.37 mL, 3.0 mmol, 3.0 equiv), the reaction mixture was stirred at  $-78\text{ }^\circ\text{C}$  for 24 h. The crude product was purified by flash column chromatography (0-15% EtOAc in hexanes) to provide (*S,Z*)-3-methyl-4-phenylbut-3-en-2-ol as a white solid in 91% yield (147 mg). M.P.  $44 - 45\text{ }^\circ\text{C}$ ; IR (thin film,  $\text{cm}^{-1}$ ) 2972, 1735, 1453, 748, 695;  $^1\text{H}$  NMR (400 MHz,  $\text{CDCl}_3$ )  $\delta$ : 7.35 (m, 2H), 7.26 – 7.20 (m, 1H), 7.18 – 7.16 (m, 2H), 6.37 (s, 1H), 4.88 (q,  $J = 6.5\text{ Hz}$ , 1H), 1.92 (d,  $J = 1.6\text{ Hz}$ , 3H), 1.64 (s, 1H), 1.34 (d,  $J = 6.5\text{ Hz}$ , 3H);  $^{13}\text{C}$  NMR (101 MHz,  $\text{CDCl}_3$ )  $\delta$ : 141.21, 137.38, 128.77, 128.26, 126.97, 126.57, 65.64, 21.40, 17.29.  $[\alpha]_{\text{D}}^{23} = 84.9$  ( $c = 1.0$ ,  $\text{CHCl}_3$ ). HPLC analysis (IC, 5% IPA in hexanes, 1 mL/min, 220 nm) indicated 89% ee:  $t_{\text{R}}$  (minor) = 6.2 min,  $t_{\text{R}}$  (major) = 8.2 min. HRMS (DART-TOF) calculated for  $\text{C}_{11}\text{H}_{14}\text{O}$   $[\text{M}+\text{H}]^+$   $m/z$  161.0961, found 161.0961.

Following **General Procedure D** (for hydroamination), using  $\text{Cu}(\text{OAc})_2$  (1.8 mg, 0.005 mmol, 5 mol %) and (*R*)-DTBM-SEGPHOS (13.4 mg, 0.011 mmol, 5.5 mol %), (*R,Z*)-3-methyl-4-phenylbut-3-en-2-ol (32 mg, 0.2 mmol, 1.0 equiv),  $(\text{MeO})_2\text{MeSiH}$  (62  $\mu\text{L}$ , 1.0 mmol, 5.0 equiv), the reaction mixture was stirred at  $55\text{ }^\circ\text{C}$  for 70 h. The diastereomeric ratio was determined to  $>20/1$  via  $^1\text{H}$  NMR analysis of the crude sample. The crude product was purified flash column chromatography (0-10%  $\text{Et}_2\text{O}$  in hexanes) to provide the title compound as white foam in 70% yield (50 mg). IR (thin film,  $\text{cm}^{-1}$ ) 2969, 1493, 1453, 909, 748, 697;  $^1\text{H}$  NMR (400 MHz,  $\text{CDCl}_3$ )  $\delta$ : 7.46 – 7.42 (m, 6H), 7.38 – 7.32 (m, 5H), 7.29 – 7.21 (m, 2H), 7.21 – 7.11 (m, 2H), 3.92 (d,  $J = 13.8\text{ Hz}$ , 2H), 3.70 (d,  $J = 11.3\text{ Hz}$ , 1H), 3.54 – 3.41 (m, 1H), 3.02 (d,  $J = 13.8\text{ Hz}$ , 2H), 2.30 – 2.22 (m, 1H), 1.30 (d,  $J = 6.7\text{ Hz}$ , 3H), 1.08 (d,  $J = 6.5\text{ Hz}$ , 3H);  $^{13}\text{C}$  NMR (101 MHz,  $\text{CDCl}_3$ )  $\delta$ : 140.13, 136.22, 129.78, 128.83, 128.43, 128.21, 127.30, 126.91, 67.48, 65.03, 53.84, 39.95, 21.88, 9.73.  $[\alpha]_{\text{D}}^{23} = -97.1$  ( $c = 1.0$ ,  $\text{CHCl}_3$ ). HPLC analysis (IC, 1% IPA in hexanes, 0.5 mL/min, 220 nm) indicated  $>99\%$  ee:  $t_{\text{R}}$  (major) = 7.4 min,  $t_{\text{R}}$  (minor) = 8.1 min. HRMS (DART-TOF) calculated for  $\text{C}_{25}\text{H}_{29}\text{NO}$   $[\text{M}+\text{H}]^+$   $m/z$  360.2322, found 360.2322.

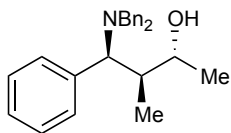

**(2*R*,3*S*,4*S*)-4-(dibenzylamino)-3-methyl-4-phenylbutan-2-ol ((*R,S,S*)-5a).**

Following **General Procedure C** (for 1,2-reduction), using  $\text{Cu}(\text{OAc})_2$  (9.0 mg, 0.05 mmol, 5 mol %), (*R*)-DTBM-SEGPPOS (66.4 mg, 0.055 mmol, 5.5 mol %), (*Z*)-3-methyl-4-phenylbut-3-en-2-one (160 mg, 1.0 mmol, 1.0 equiv),  $(\text{MeO})_2\text{MeSiH}$  (0.37 mL, 3.0 mmol, 3.0 equiv), the reaction mixture was stirred at  $-78\text{ }^\circ\text{C}$  for 24 h. The crude product was purified by flash column chromatography (0-15% EtOAc in hexanes) to provide (*R,Z*)-3-methyl-4-phenylbut-3-en-2-ol as a white solid in 91% yield (147 mg). M.P.  $44 - 45\text{ }^\circ\text{C}$ ; IR (thin film,  $\text{cm}^{-1}$ ) 2972, 1735, 1453, 748, 695;  $^1\text{H}$  NMR (400 MHz,  $\text{CDCl}_3$ )  $\delta$ : 7.33 (dd,  $J = 8.1, 6.7$  Hz, 2H), 7.26 – 7.20 (m, 1H), 7.17 (dd,  $J = 7.6, 1.4$  Hz, 2H), 6.37 (s, 1H), 4.88 (q,  $J = 6.5$  Hz, 1H), 1.92 (d,  $J = 1.6$  Hz, 3H), 1.64 (s, 1H), 1.34 (d,  $J = 6.5$  Hz, 3H);  $^{13}\text{C}$  NMR (101 MHz,  $\text{CDCl}_3$ )  $\delta$ : 141.21, 137.38, 128.77, 128.26, 126.97, 126.57, 65.64, 21.40, 17.29.  $[\alpha]_{\text{D}}^{23} = -84.1$  ( $c = 1.0$ ,  $\text{CHCl}_3$ ). HPLC analysis (IC, 5% IPA in hexanes, 1 mL/min, 220 nm) indicated 89% ee:  $t_{\text{R}}$  (major) = 6.2 min,  $t_{\text{R}}$  (minor) = 8.2 min. HRMS (DART-TOF) calculated for  $\text{C}_{11}\text{H}_{14}\text{O}$   $[\text{M}-\text{H}]^+$   $m/z$  161.0961, found 161.0961.

Following **General Procedure D** (for hydroamination), using  $\text{Cu}(\text{OAc})_2$  (1.8 mg, 0.005 mmol, 5 mol %) and (*S*)-DTBM-SEGPPOS (13.4 mg, 0.011 mmol, 5.5 mol %), (*S,Z*)-3-methyl-4-phenylbut-3-en-2-ol (32 mg, 0.2 mmol, 1.0 equiv),  $(\text{MeO})_2\text{MeSiH}$  (62  $\mu\text{L}$ , 1.0 mmol, 5.0 equiv), the reaction mixture was stirred at  $55\text{ }^\circ\text{C}$  for 70 h. The diastereomeric ratio was determined to  $>20/1$  via  $^1\text{H}$  NMR analysis of the crude sample. The crude product was purified flash column chromatography (0-10%  $\text{Et}_2\text{O}$  in hexanes) to provide the title compound as white foam in 68% yield (49 mg). IR (thin film,  $\text{cm}^{-1}$ ) 2972, 1452, 909, 748, 697;  $^1\text{H}$  NMR (400 MHz,  $\text{CDCl}_3$ )  $\delta$ : 7.44 – 7.39 (m, 6H), 7.35 – 7.29 (m, 5H), 7.24 – 7.20 (m, 2H), 7.15 – 7.13 (m, 2H), 3.89 (d,  $J = 13.8$  Hz, 2H), 3.67 (d,  $J = 11.3$  Hz, 1H), 3.47 – 3.43 (m, 1H), 3.00 (d,  $J = 13.8$  Hz, 2H), 2.27 – 2.19 (m, 1H), 1.26 (d,  $J = 6.7$  Hz, 3H), 1.06 (d,  $J = 6.5$  Hz, 3H);  $^{13}\text{C}$  NMR (101 MHz,  $\text{CDCl}_3$ )  $\delta$ : 140.14, 136.23, 129.79, 128.83, 128.44, 128.22, 127.32, 126.92, 67.50, 65.04, 53.85, 39.96, 21.89, 9.74.  $[\alpha]_{\text{D}}^{23} = 101.1$  ( $c = 1.0$ ,  $\text{CHCl}_3$ ). HPLC analysis (IC, 1% IPA in hexanes, 0.5 mL/min, 220 nm) indicated  $>99\%$  ee:  $t_{\text{R}}$  (major) = 7.4 min,  $t_{\text{R}}$  (minor) = 8.1 min. HRMS (DART-TOF) calculated for  $\text{C}_{25}\text{H}_{29}\text{NO}$   $[\text{M}+\text{H}]^+$   $m/z$  360.2322, found 360.2325.

## 5. Determination of the Absolute and Relative Configuration of Products

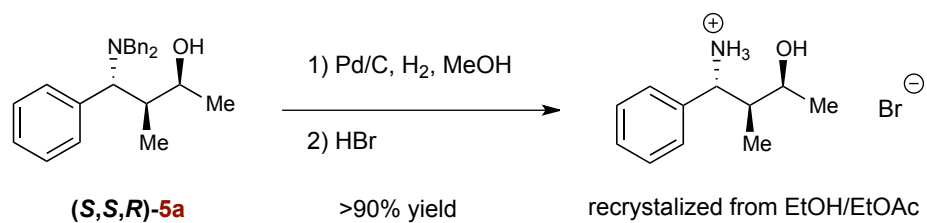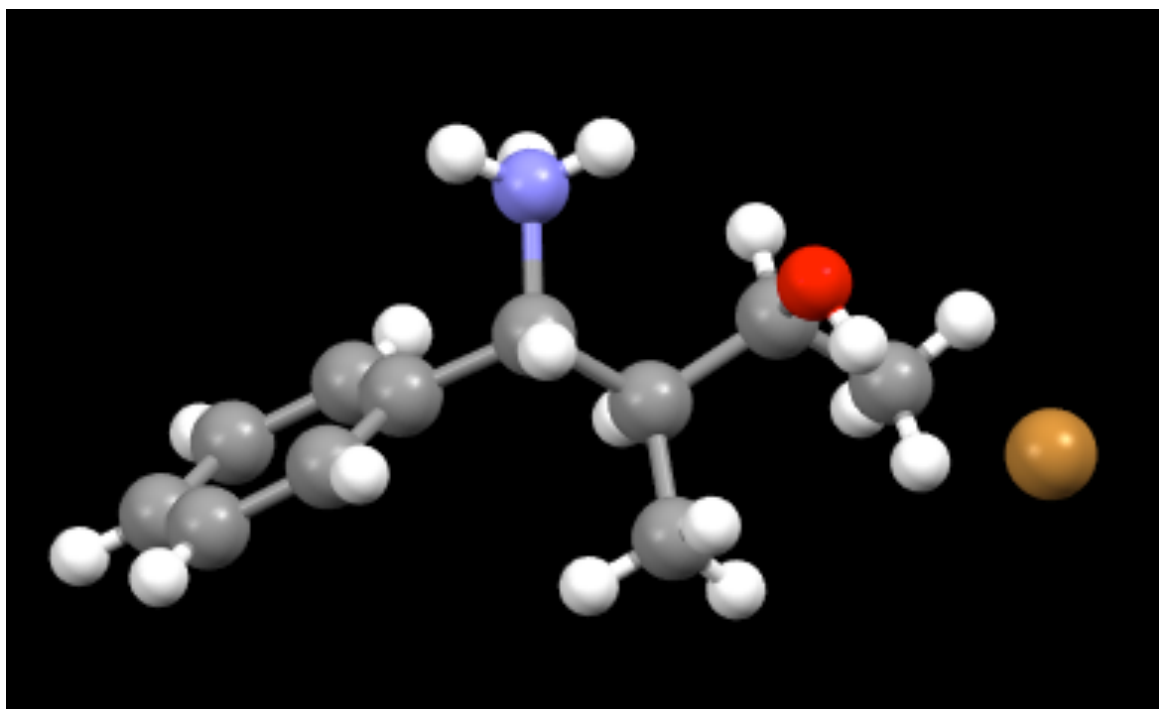

The absolute and relative configuration of **5a** (Prepared from (*E*)-3-methyl-4-phenylbut-3-en-2-one using (*S*)-**L1** using General Procedure B) in **Figure 4** in the manuscript was determined to be (*S,S,R*) by X-ray diffraction after debenzoylation and hydrobromide salt formation. The stereochemistries of the remaining amino alcohols were assigned by analogy.



## 6. Preparation of Substrates

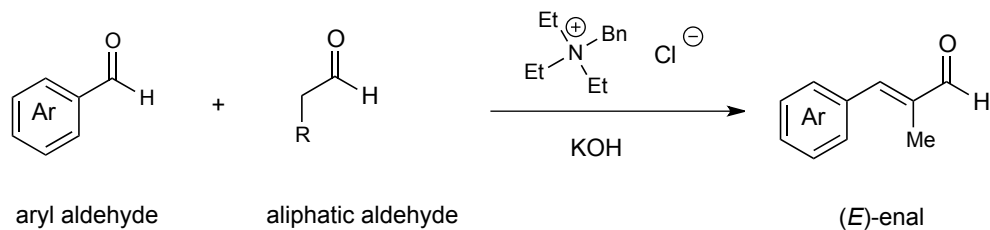

### General Procedure E for the Preparation of Enals

To a vigorously stirring suspension of benzyltriethylammonium chloride (1.0 mmol) and potassium hydroxide (1.50 mmol) in toluene (15.0 mL) was added aryl aldehyde (10.0 mmol) and aliphatic aldehyde (12.0 mmol). The mixture was stirred at room temperature and monitored by thin-layer chromatography. The reaction mixture was extracted with EtOAc and the combined organic layers were dried over  $\text{Na}_2\text{SO}_4$ , and filtered. The solvent was removed under reduced pressure and the resulting residue was purified by column chromatography (EtOAc/hexanes) or recrystallization to afford the enal.<sup>11</sup>

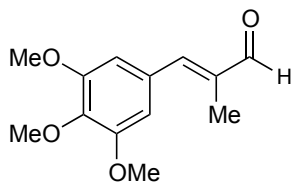

### (E)-2-methyl-3-(3,4,5-trimethoxyphenyl)acrylaldehyde.

The title compound was prepared by following **General Procedure E** as an off-white solid. M.P. 86 – 87 °C; IR (thin film,  $\text{cm}^{-1}$ ) 1662, 1575, 1330, 1244, 1123;  $^1\text{H}$  NMR (400 MHz,  $\text{CDCl}_3$ )  $\delta$ : 9.55 (s, 1H), 7.18 (d,  $J = 1.9$  Hz, 1H), 6.77 (s, 2H), 3.90 (d,  $J = 2.6$  Hz, 9H), 2.10 (d,  $J = 1.3$  Hz, 3H);  $^{13}\text{C}$  NMR (101 MHz,  $\text{CDCl}_3$ )  $\delta$ : 195.44, 153.33, 150.04, 139.61, 137.65, 130.73, 107.70, 61.11, 56.34, 11.13. HRMS (DART-TOF) calculated for  $\text{C}_{13}\text{H}_{16}\text{O}_4$   $[\text{M}+\text{H}]^+$   $m/z$  237.1121, found 237.1115.

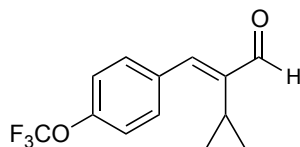

### (E)-2-cyclopropyl-3-(4-(trifluoromethoxy)phenyl)acrylaldehyde.

The title compound was prepared by following **General Procedure E** as a bright yellow liquid. IR (thin film,  $\text{cm}^{-1}$ ) 1688, 1252, 1217, 1205, 1159;  $^1\text{H}$  NMR (400 MHz,  $\text{CDCl}_3$ )  $\delta$ : 9.65 – 9.42 (m, 1H), 7.69 (d,  $J = 8.7$  Hz, 1H), 7.34 – 7.20 (m, 3H), 1.74 – 1.61 (m, 1H), 0.98 – 0.84 (m, 2H), 0.78 – 0.64 (m, 2H);  $^{13}\text{C}$  NMR (101 MHz,  $\text{CDCl}_3$ )  $\delta$ : 195.12, 149.88, 149.15, 142.80, 133.36, 131.89, 121.82, 120.72, 119.26, 8.71, 7.57. HRMS (DART-TOF) calculated for  $\text{C}_{13}\text{H}_{11}\text{F}_3\text{O}_2$   $[\text{M}+\text{H}]^+$   $m/z$  257.0784, found 257.0778.

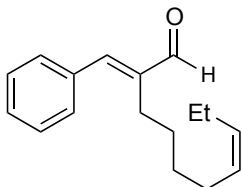

**(2E,7Z)-2-benzylidenedec-7-enal.**

The title compound was prepared by following **General Procedure E** as a pale yellow liquid. IR (thin film,  $\text{cm}^{-1}$ ) 2931, 2858, 1660, 1623, 755;  $^1\text{H}$  NMR (400 MHz,  $\text{CDCl}_3$ )  $\delta$ : 9.55 (s, 1H), 7.52 – 7.39 (m, 5H), 7.22 (s, 1H), 5.42 – 5.24 (m, 2H), 2.61 – 2.48 (m, 2H), 2.03 (m, 4H), 1.56 – 1.41 (m, 3H), 0.94 (t,  $J = 7.5$  Hz, 3H);  $^{13}\text{C}$  NMR (101 MHz,  $\text{CDCl}_3$ )  $\delta$ : 195.83, 150.00, 143.34, 135.08, 132.01, 129.73, 128.93, 30.09, 28.04, 26.93, 24.82, 20.66, 14.49. HRMS (DART-TOF) calculated for  $\text{C}_{17}\text{H}_{22}\text{O}$   $[\text{M}-\text{H}]^+$   $m/z$  241.1598, found 259.1700.

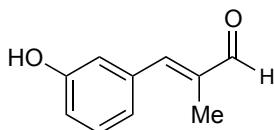

**(E)-3-(3-hydroxyphenyl)-2-methylacrylaldehyde.**

The title compound was prepared by following **General Procedure E** as a white solid. M.P. 119 – 120 °C; IR (thin film,  $\text{cm}^{-1}$ ) 3228, 1650, 1575, 1281, 1194;  $^1\text{H}$  NMR (400 MHz,  $\text{CDCl}_3$ )  $\delta$ : 9.57 (s, 5H), 7.33 (t,  $J = 7.9$  Hz, 5H), 7.23 (s, 1H), 7.15 – 7.07 (m, 5H), 7.04 (d,  $J = 2.2$  Hz, 4H), 6.91 (ddd,  $J = 8.2, 2.6, 0.9$  Hz, 5H), 5.56 (s, 5H), 2.08 (d,  $J = 1.4$  Hz, 15H);  $^{13}\text{C}$  NMR (101 MHz,  $\text{CDCl}_3$ )  $\delta$ : 196.14, 155.99, 150.12, 138.69, 136.70, 130.09, 122.88, 116.96, 116.74, 11.14. HRMS (DART-TOF) calculated for  $\text{C}_{10}\text{H}_{10}\text{O}_2$   $[\text{M}+\text{H}]^+$   $m/z$  163.0754, found 163.0750.

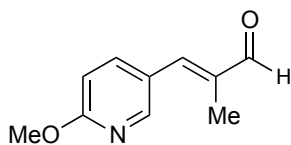

**(E)-3-(6-methoxypyridin-3-yl)-2-methylacrylaldehyde.**

The title compound was prepared by following **General Procedure E** as a light brown solid. M.P. 105 – 106 °C; IR (thin film,  $\text{cm}^{-1}$ ) 1669, 1597, 1493, 1293, 1007;  $^1\text{H}$  NMR (400 MHz,  $\text{CDCl}_3$ )  $\delta$ : 9.56 (s, 1H), 8.37 (d,  $J = 2.4$  Hz, 1H), 7.80 (dd,  $J = 8.7, 2.5$  Hz, 1H), 7.16 (d,  $J = 1.6$  Hz, 1H), 6.82 (d,  $J = 8.7$  Hz, 1H), 3.98 (s, 3H), 2.07 (d,  $J = 1.4$  Hz, 3H);  $^{13}\text{C}$  NMR (101 MHz,  $\text{CDCl}_3$ )  $\delta$ : 195.02, 164.65, 149.58, 146.26, 139.46, 137.71, 124.77, 111.31, 53.95, 11.10. HRMS (DART-TOF) calculated for  $\text{C}_{10}\text{H}_{11}\text{NO}_2$   $[\text{M}+\text{H}]^+$   $m/z$  178.0863, found 178.0857.

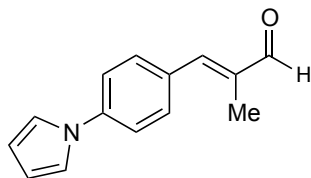

**(E)-3-(4-(1H-pyrrol-1-yl)phenyl)-2-methylacrylaldehyde.**

The title compound was prepared by following **General Procedure E** as a bright yellow solid. M.P. 102 – 104 °C; IR (thin film,  $\text{cm}^{-1}$ ) 1667, 1600, 1518, 1326, 700;  $^1\text{H}$  NMR (400 MHz,  $\text{CDCl}_3$ )  $\delta$ : 9.60 (s, 1H), 7.62 (d,  $J = 8.6$  Hz, 2H), 7.48 (d,  $J = 8.7$  Hz, 2H), 7.26 – 7.23 (m, 1H), 7.16 (t,  $J = 2.2$  Hz, 2H), 6.39 (t,  $J = 2.2$  Hz, 2H), 2.12 (d,  $J = 1.3$  Hz, 3H);  $^{13}\text{C}$  NMR (101 MHz,  $\text{CDCl}_3$ )  $\delta$ : 195.42, 148.78, 141.34, 138.11, 132.40, 131.71, 120.11, 119.13, 111.39, 11.16. HRMS (DART-TOF) calculated for  $\text{C}_{14}\text{H}_{13}\text{NO}$   $[\text{M}+\text{H}]^+$   $m/z$  212.1070, found 212.1066.

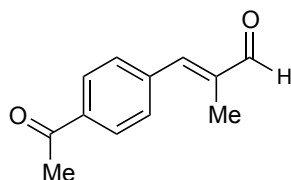

**(E)-3-(4-acetylphenyl)-2-methylacrylaldehyde.**

A solution of 4'-bromoacetophenone (13.2 mmol, 2.63g, 1.0 equiv), acrolein (6.0 mmol, 0.39 mL, 0.45 equiv), palladium acetate (0.66 mmol, 0.148 g, 0.05 equiv), triethylamine (39.6 mmol, 5.5 mL, 3.0 equiv) and benzyltriethylammonium chloride (13.2 mmol, 3.05 g, 1.0 equiv) in dimethylformamide (40 mL) was stirred and heated to 70 °C. After 3 h, additional acrolein (6.0 mmol, 0.393mL, 0.45 equiv) and palladium acetate (0.66 mmol, 0.148g, 0.05 equiv) were added. After 17 h, the reaction mixture was cooled to rt and diluted with EtOAc. The organic layer was washed with  $\text{H}_2\text{O}$  and dried over  $\text{Na}_2\text{SO}_4$  and filtered. The solvent was removed under reduced pressure and the resulting residue was purified by column chromatography (20% EtOAc in hexanes) to give the title compound as a light orange solid (50% yield, 2.26g).<sup>12</sup> M.P. 73 – 74 °C;

IR (thin film,  $\text{cm}^{-1}$ ) 1674, 1264, 1183, 1010, 591;  $^1\text{H}$  NMR (400 MHz,  $\text{CDCl}_3$ )  $\delta$ : 9.59 (s, 1H), 8.00 (d,  $J = 8.4$  Hz, 2H), 7.58 (d,  $J = 8.3$  Hz, 2H), 7.31 – 7.27 (m, 1H), 2.60 (s, 3H), 2.05 (d,  $J = 1.5$  Hz, 3H);  $^{13}\text{C}$  NMR (101 MHz,  $\text{CDCl}_3$ )  $\delta$ : 197.39, 195.18, 147.93, 140.18, 139.55, 137.26, 130.05, 128.62, 26.74, 11.11. HRMS (DART-TOF) calculated for  $\text{C}_{12}\text{H}_{12}\text{O}_2$   $[\text{M}+\text{H}]^+$   $m/z$  189.0910, found 189.0906.

### General Procedure F for the Preparation of Enones

To a solution of aliphatic ketone (50 mmol) and aromatic aldehyde (25 mmol) in glacial acetic acid (20 mL) was added sulfuric acid (2.4 g) and the reaction mixture was stirred at rt. After 20 h the mixture was then poured into  $\text{H}_2\text{O}$  (100 mL) and the carefully neutralized with aqueous NaOH. The resulting mixture was then extracted with EtOAc (3 x 30 mL), the combined organic layers were washed with a saturated aqueous  $\text{NaHCO}_3$  (20 mL) and brine (20 mL) and dried over  $\text{Na}_2\text{SO}_4$  and filtered. The solvent was removed under reduced pressure and the residue was purified by column chromatography (hexane/EtOAc, 20:1) to afford the enone.

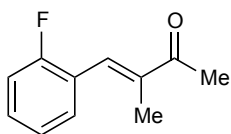

### (E)-4-(2-fluorophenyl)-3-methylbut-3-en-2-one.

The title compound was prepared by following **General Procedure F** as an orange oil. IR (thin film,  $\text{cm}^{-1}$ ) 1667, 1483, 1365, 1233, 753;  $^1\text{H}$  NMR (400 MHz,  $\text{CDCl}_3$ )  $\delta$ : 9.99 (s, 1H), 7.74 (t,  $J = 1.9$  Hz, 1H), 7.65 – 7.59 (m, 1H), 7.58 – 7.52 (m, 1H), 7.39 (pd,  $J = 7.4, 1.4$  Hz, 2H), 3.67 (d,  $J = 1.8$  Hz, 2H);  $^{13}\text{C}$  NMR (101 MHz,  $\text{CDCl}_3$ )  $\delta$ : 188.39, 147.93, 147.21, 145.22, 142.38, 129.05, 127.31, 124.98, 124.41, 35.66. HRMS (DART-TOF) calculated for  $\text{C}_{11}\text{H}_{11}\text{FO}$   $[\text{M}+\text{H}]^+$   $m/z$  179.0867, found 179.0867.

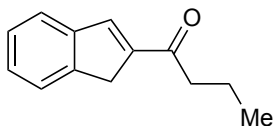

### 1-(1H-inden-2-yl)butan-1-one<sup>13</sup>.

A solution 2-bromobenzaldehyde (3.0 mmol), hex-1-en-3-ol (3.6 mmol), tetrabutylammonium chloride (6.0 mmol), sodium acetate (7.5 mmol), lithium chloride (6.0 mmol), and palladium acetate (0.15 mmol) in DMF (30 mL) under an argon atmosphere was heated at 110 °C and stirred for 4 h. The reaction mixture was cooled to rt and extracted with EtOAc. The combined

organic layers were dried over Na<sub>2</sub>SO<sub>4</sub>, filtered and the solvent was removed under reduced pressure. The resulting residue was purified by column chromatography (hexane/EtOAc, 5:1) to yield the product as a yellow solid (60% yield). M.P. 75 – 76 °C; IR (thin film, cm<sup>-1</sup>) 2957, 1647, 1556, 1174, 752; <sup>1</sup>H NMR (400 MHz, CDCl<sub>3</sub>) δ: 7.53 (q, *J* = 1.6 Hz, 1H), 7.48 – 7.35 (m, 2H), 7.27 – 7.18 (m, 2H), 3.67 – 3.45 (m, 2H), 2.71 (t, *J* = 7.4 Hz, 2H), 1.65 (h, *J* = 7.4 Hz, 2H), 0.90 (t, *J* = 7.4 Hz, 3H); <sup>13</sup>C NMR (101 MHz, CDCl<sub>3</sub>) δ: 198.32, 146.25, 145.02, 143.04, 140.17, 128.10, 127.04, 124.61, 123.83, 40.97, 37.66, 18.44, 14.09. HRMS (DART-TOF) calculated for C<sub>13</sub>H<sub>14</sub>O [M+H]<sup>+</sup> *m/z* 187.1117, found 187.1107.

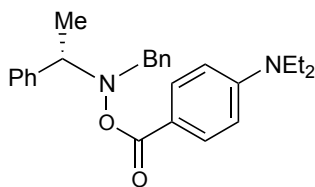

**(S)-4-(((benzyl(1-phenylethyl)amino)oxy)carbonyl)-N,N-diethylaniline**

The title compound was prepared by following the reported procedure as a yellow solid.<sup>1</sup> M.P. 93 – 94 °C; IR (thin film, cm<sup>-1</sup>) 1722, 1601, 1256, 1179, 696; <sup>1</sup>H NMR (400 MHz, CDCl<sub>3</sub>) δ: 7.76 (d, *J* = 8.9 Hz, 2H), 7.58 – 7.46 (m, 2H), 7.44 – 7.14 (m, 7H), 6.57 (d, *J* = 9.0 Hz, 2H), 4.20 (q, *J* = 6.7 Hz, 1H), 4.09 (d, *J* = 14.0 Hz, 1H), 3.92 (d, *J* = 14.0 Hz, 1H), 3.39 (q, *J* = 7.1 Hz, 4H), 1.53 (d, *J* = 6.6 Hz, 3H), 1.18 (t, *J* = 7.1 Hz, 6H); <sup>13</sup>C NMR (101 MHz, CDCl<sub>3</sub>) δ: 165.57, 150.87, 136.71, 131.38, 129.35, 128.49, 127.95, 127.51, 127.17, 114.98, 110.12, 65.76, 59.70, 44.45, 19.85, 12.50. [α]<sub>D</sub><sup>23</sup> = 19.3 (c = 1.0, CHCl<sub>3</sub>). HRMS (DART-TOF) calculated for C<sub>26</sub>H<sub>30</sub>N<sub>2</sub>O<sub>2</sub> [M+H]<sup>+</sup> *m/z* 403.2380, found 403.2390.

## 7. References

1. Yang, Y., Shi, S.L., Niu, D., Liu, P. & Buchwald S.L. Catalytic asymmetric hydroamination of unactivated internal olefins to aliphatic amines. *Science* **349**, 62–66 (2015).
2. Dasgupta, R. & Ghatak, U. R. A simple synthesis of α, β-unsaturated aldehydes by 1,3-carbonyl transposition through one carbon homologation. *Tetrahedron Lett.* **26**, 1581–1584 (1985).
3. Li, C., Li, X. & Hong, R. Synthetic study on tetrapetalones: stereoselective cyclization of *N*-acyliminium ion to construct substituted 1-benzazepines. *Org. Lett.* **11**, 4036–4039 (2009).

4. Still, W.C. & Cesare Gennari, C. Direct synthesis of Z-unsaturated esters. A useful modification of the horner-emmons olefination. *Tetrahedron Lett.* **24**, 4405-4408 (1983)
5. Guo, K. *et al.* Assembly of indenamine derivatives through in situ formed N-sulfonyliminium ion initiated cyclization. *Chem. Commun.* **50**, 4119–4122 (2014).
6. Smith III, A. B. *et al.* Total synthesis of (-)-2-epi-peloruside A. *Org. Lett.* **10**, 5501–5504 (2008).
7. Lu, S.M. & Bolm, C. Highly enantioselective synthesis of optically active ketones by iridium-catalyzed asymmetric hydrogenation. *Angew. Chem. Int. Ed.* **47**, 8920-8923 (2008)
8. Deng, J.G. *et al.* Transfer hydrogenation of activated C=C bonds catalyzed by ruthenium amido complexes: reaction scope, limitation, and enantioselectivity. *J. Org. Chem.*, **70**, 3584–3591 (2005).
9. Yu, W. & Jin, Z. A highly selective synthesis of (Z)- $\alpha,\beta$ -unsaturated ketones. *Tetrahedron Lett.*, **40**, 6725–6728, (1999).
10. Jiao, L., Yuan, C. & Yu, Z.X. Tandem Rh(I)-catalyzed [(5+2)+1] cycloaddition/Aldol reaction for the construction of linear triquinane skeleton: total syntheses of ( $\pm$ )-hirsutene and ( $\pm$ )-1-desoxyhypnophilin. *J. Am. Chem. Soc.*, **130**, 4421–4430, (2008).
11. Kryshnal, G.V., Zhdankina, G.M. & Zlotin, S.G. Tetraalkylammonium and 1,3-dialkylimidazolium salts with fluorinated anions as recoverable phase-transfer catalysts in solid base-promoted cross-Aldol condensations. *Eur. J. Org. Chem.* **2005**, 13, 2822–2827 (2005).
12. Maezaki, H. *et al.* Discovery of a 3-pyridylacetic acid derivative (TAK-100) as a potent, selective and orally active dipeptidyl peptidase IV (DPP-4) inhibitor. *J. Med. Chem.* **54**, 831–850 (2011).
13. Tu, S., Xu, L.H., Ye, L.Y., Wang, X., Sha, Y. & Xiao, Z.Y. Synthesis and fungicidal activities of novel indene-substituted oxime ether strobilurins. *J. Agric. Food Chem.* **56**, 5247–5253 (2008).

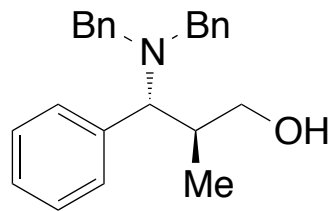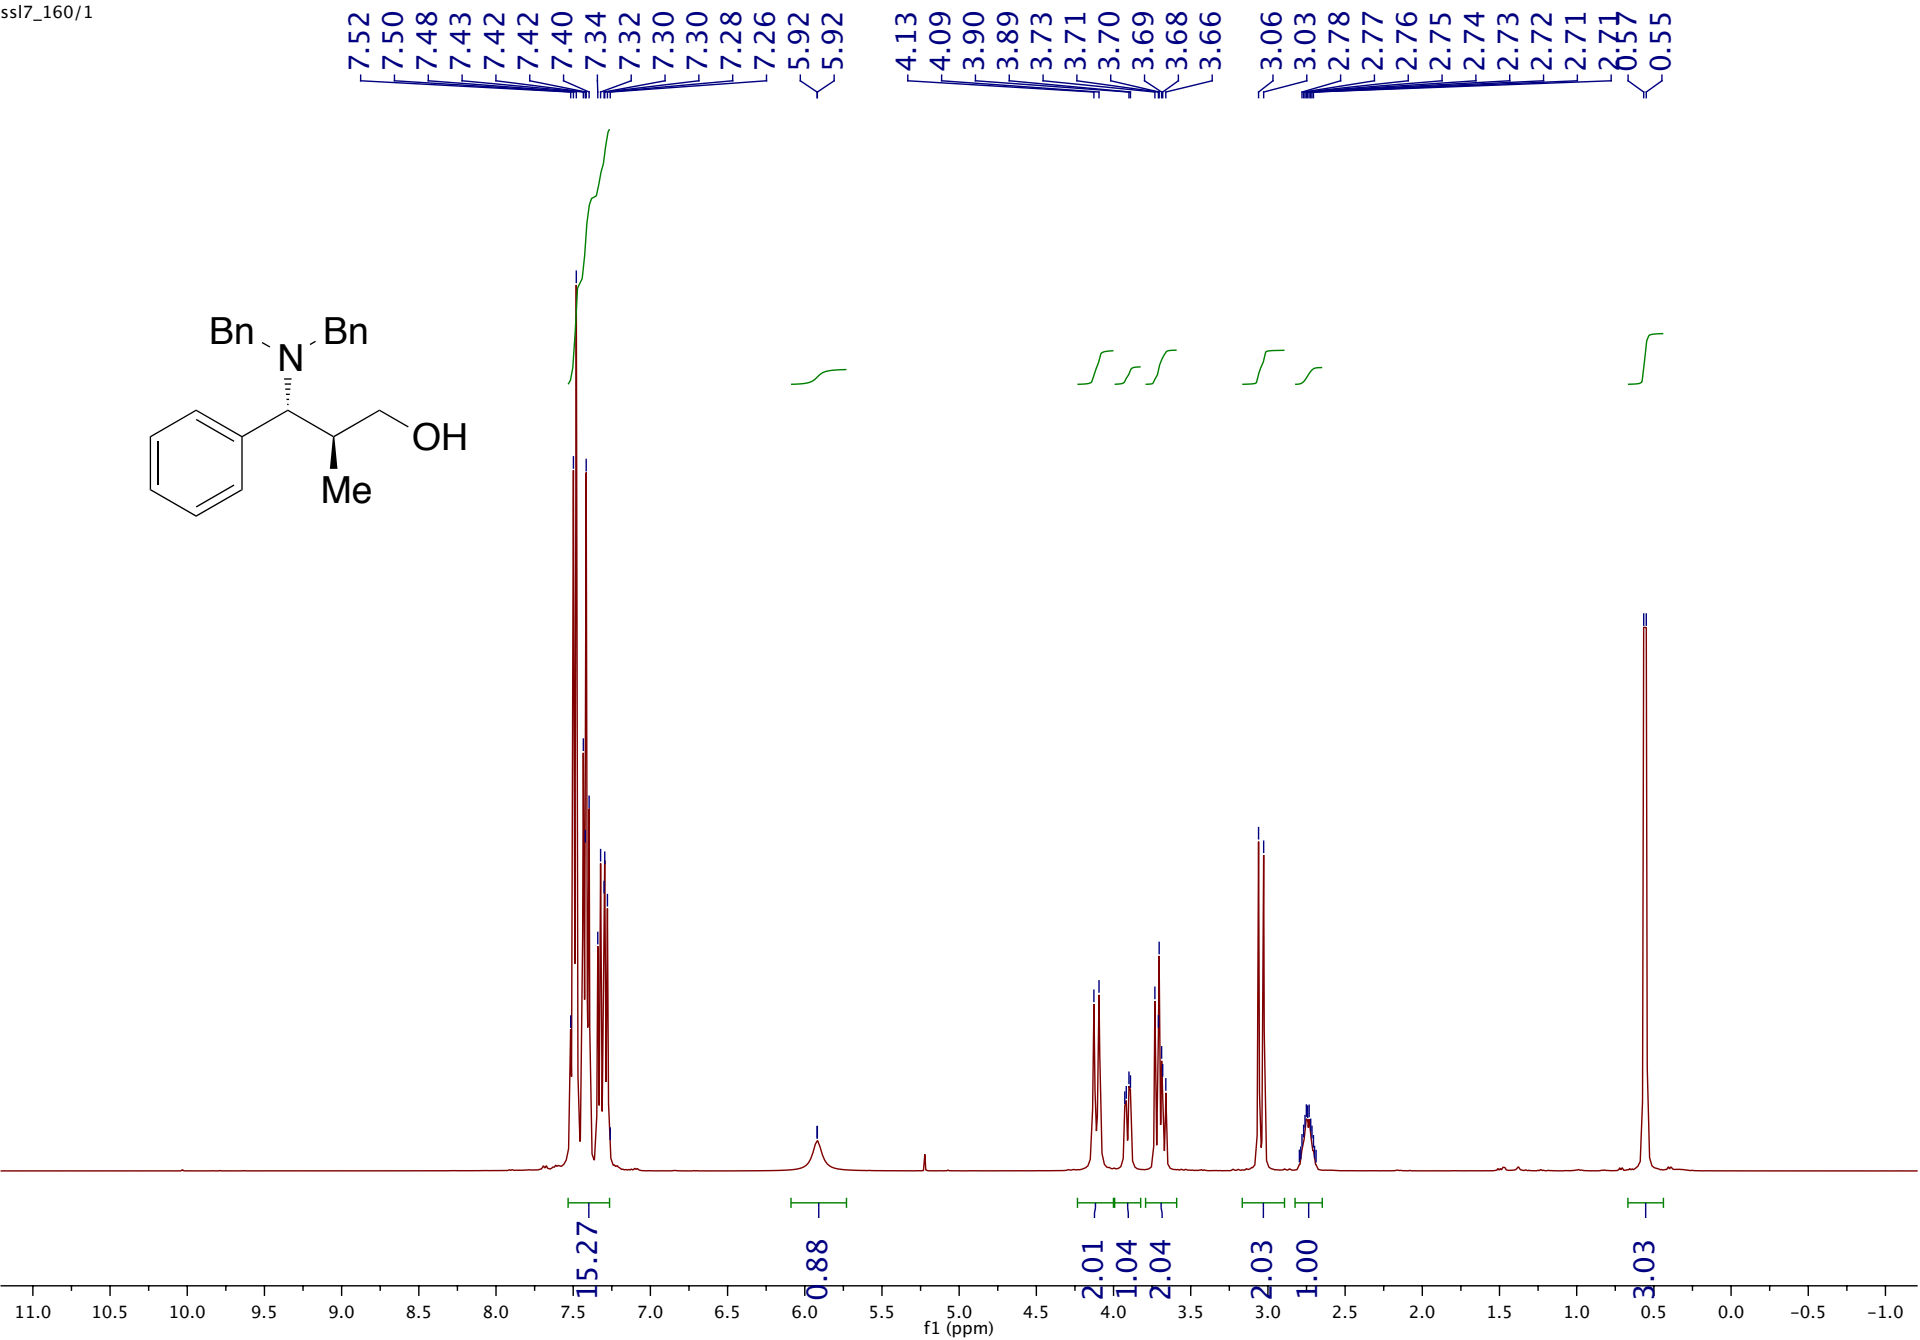



138.37  
134.15  
129.92  
129.09  
128.53  
127.93  
127.44  
127.21

77.48 CDCl3  
77.16 CDCl3  
76.84 CDCl3  
69.30  
68.92

53.95

33.85

15.27

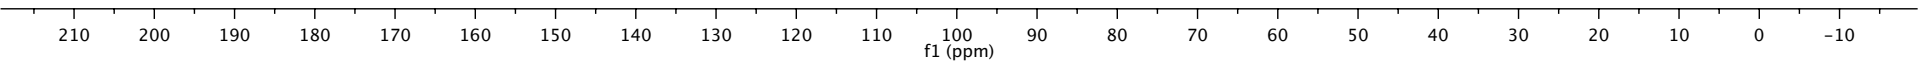



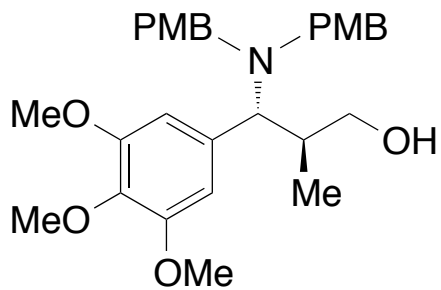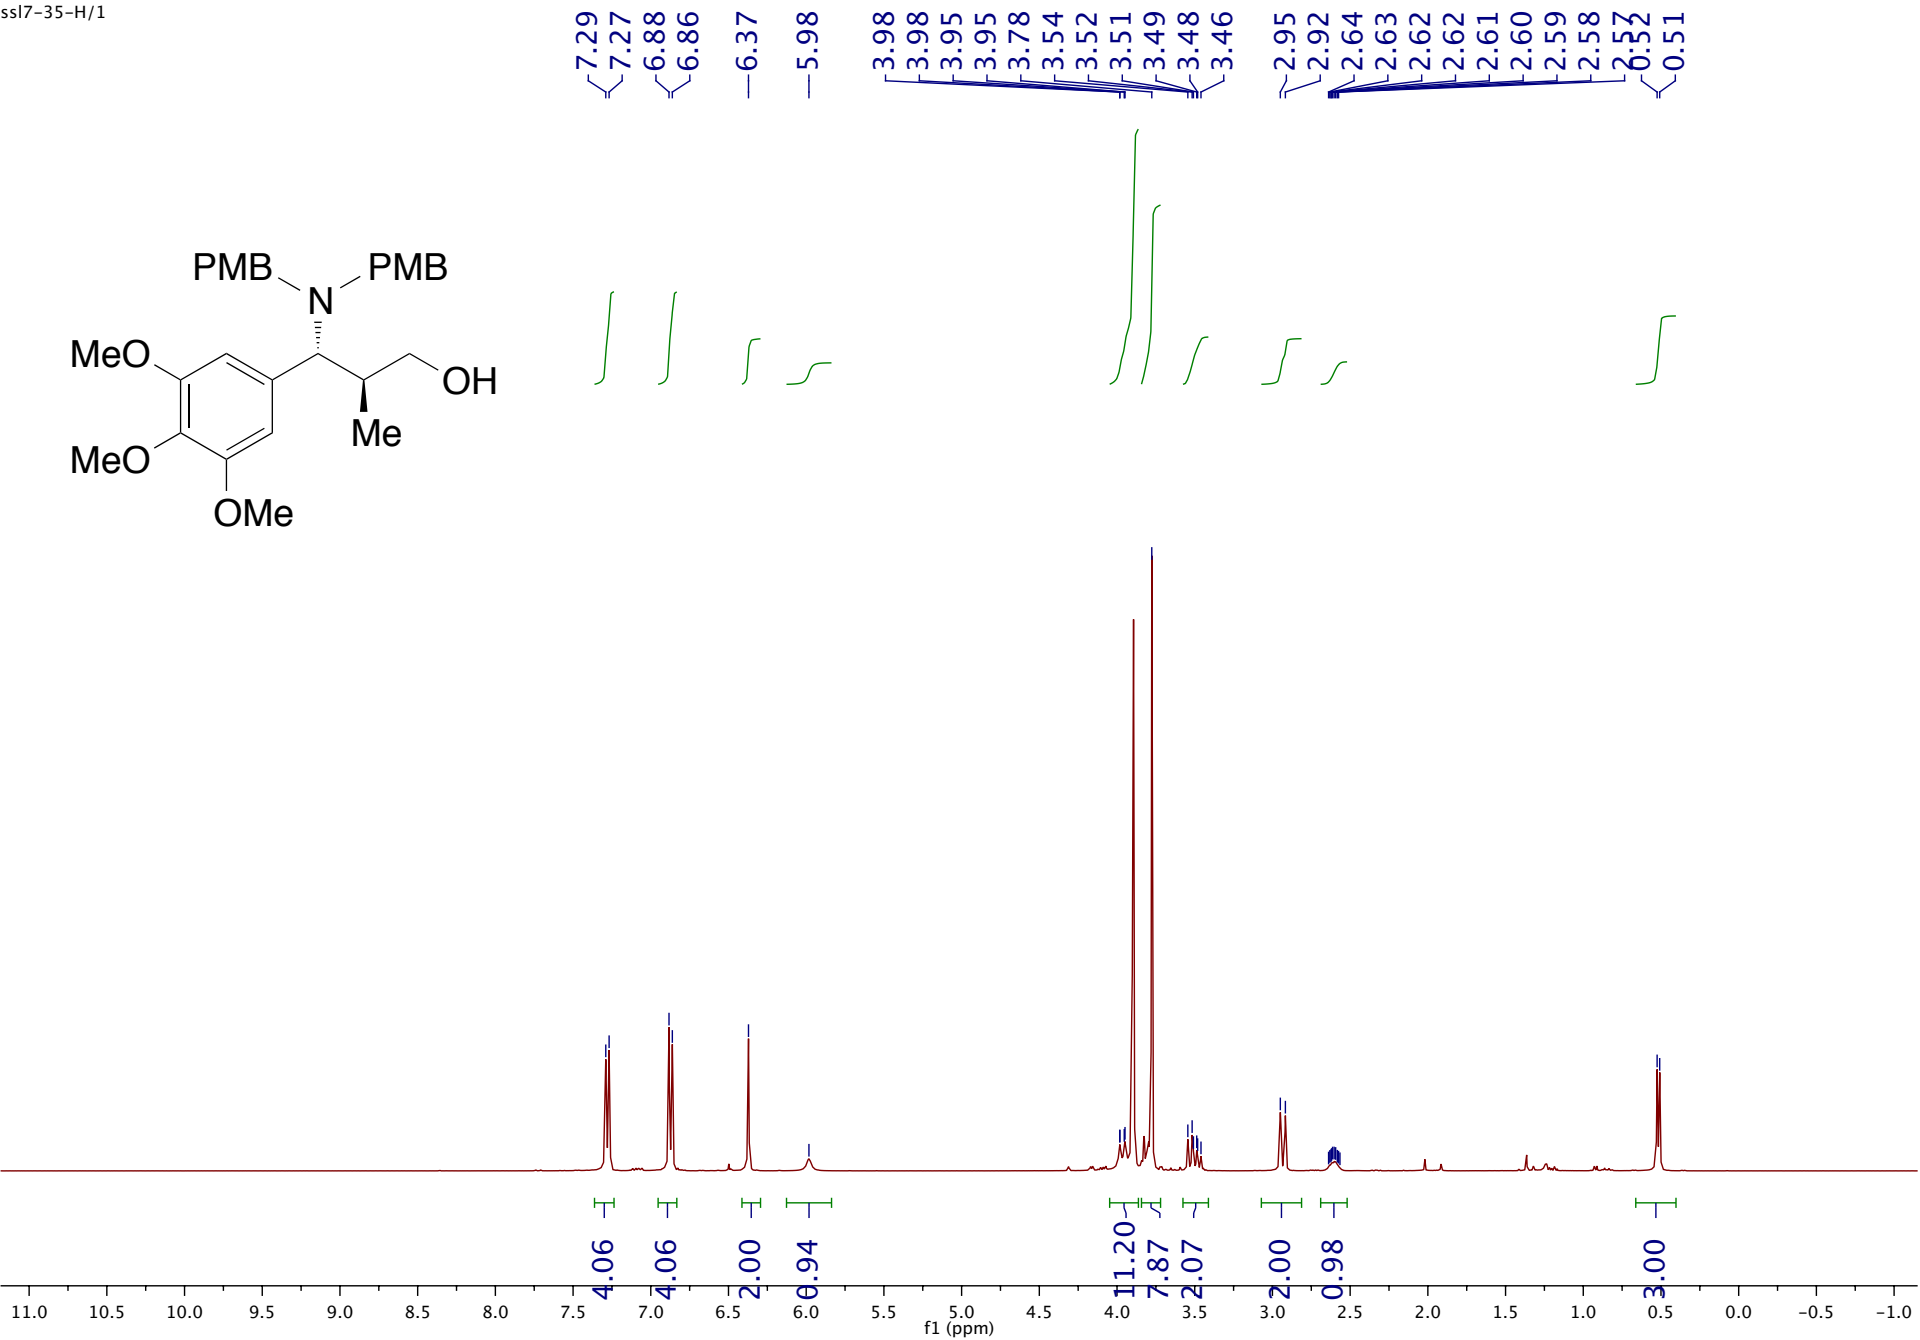

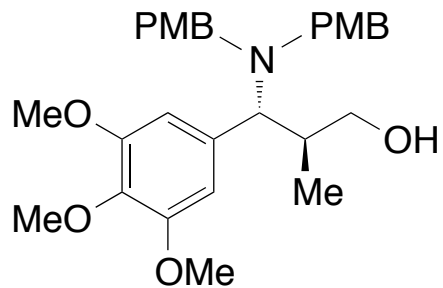

- 158.89
- 152.81
- 137.39
- 130.37
- 130.06
- 114.07
- 107.30
- 77.48 CDC13
- 77.16 CDC13
- 76.84 CDC13
- 69.81
- 69.37
- 60.94
- 56.26
- 55.25
- 53.44
- 33.97
- 15.36

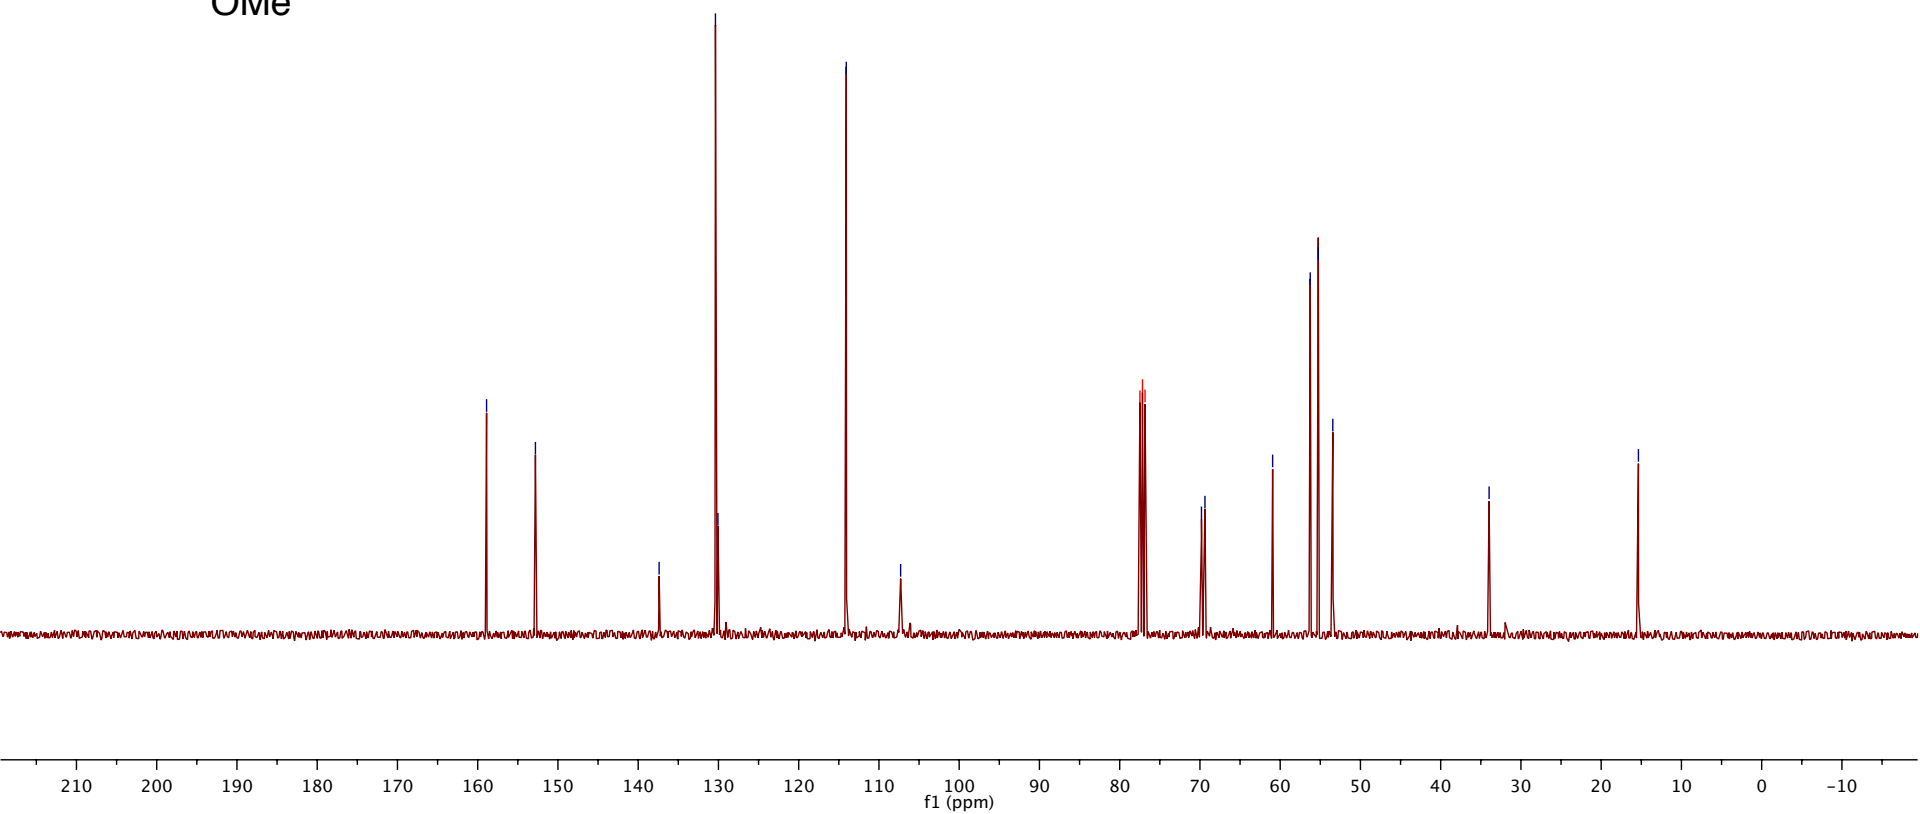

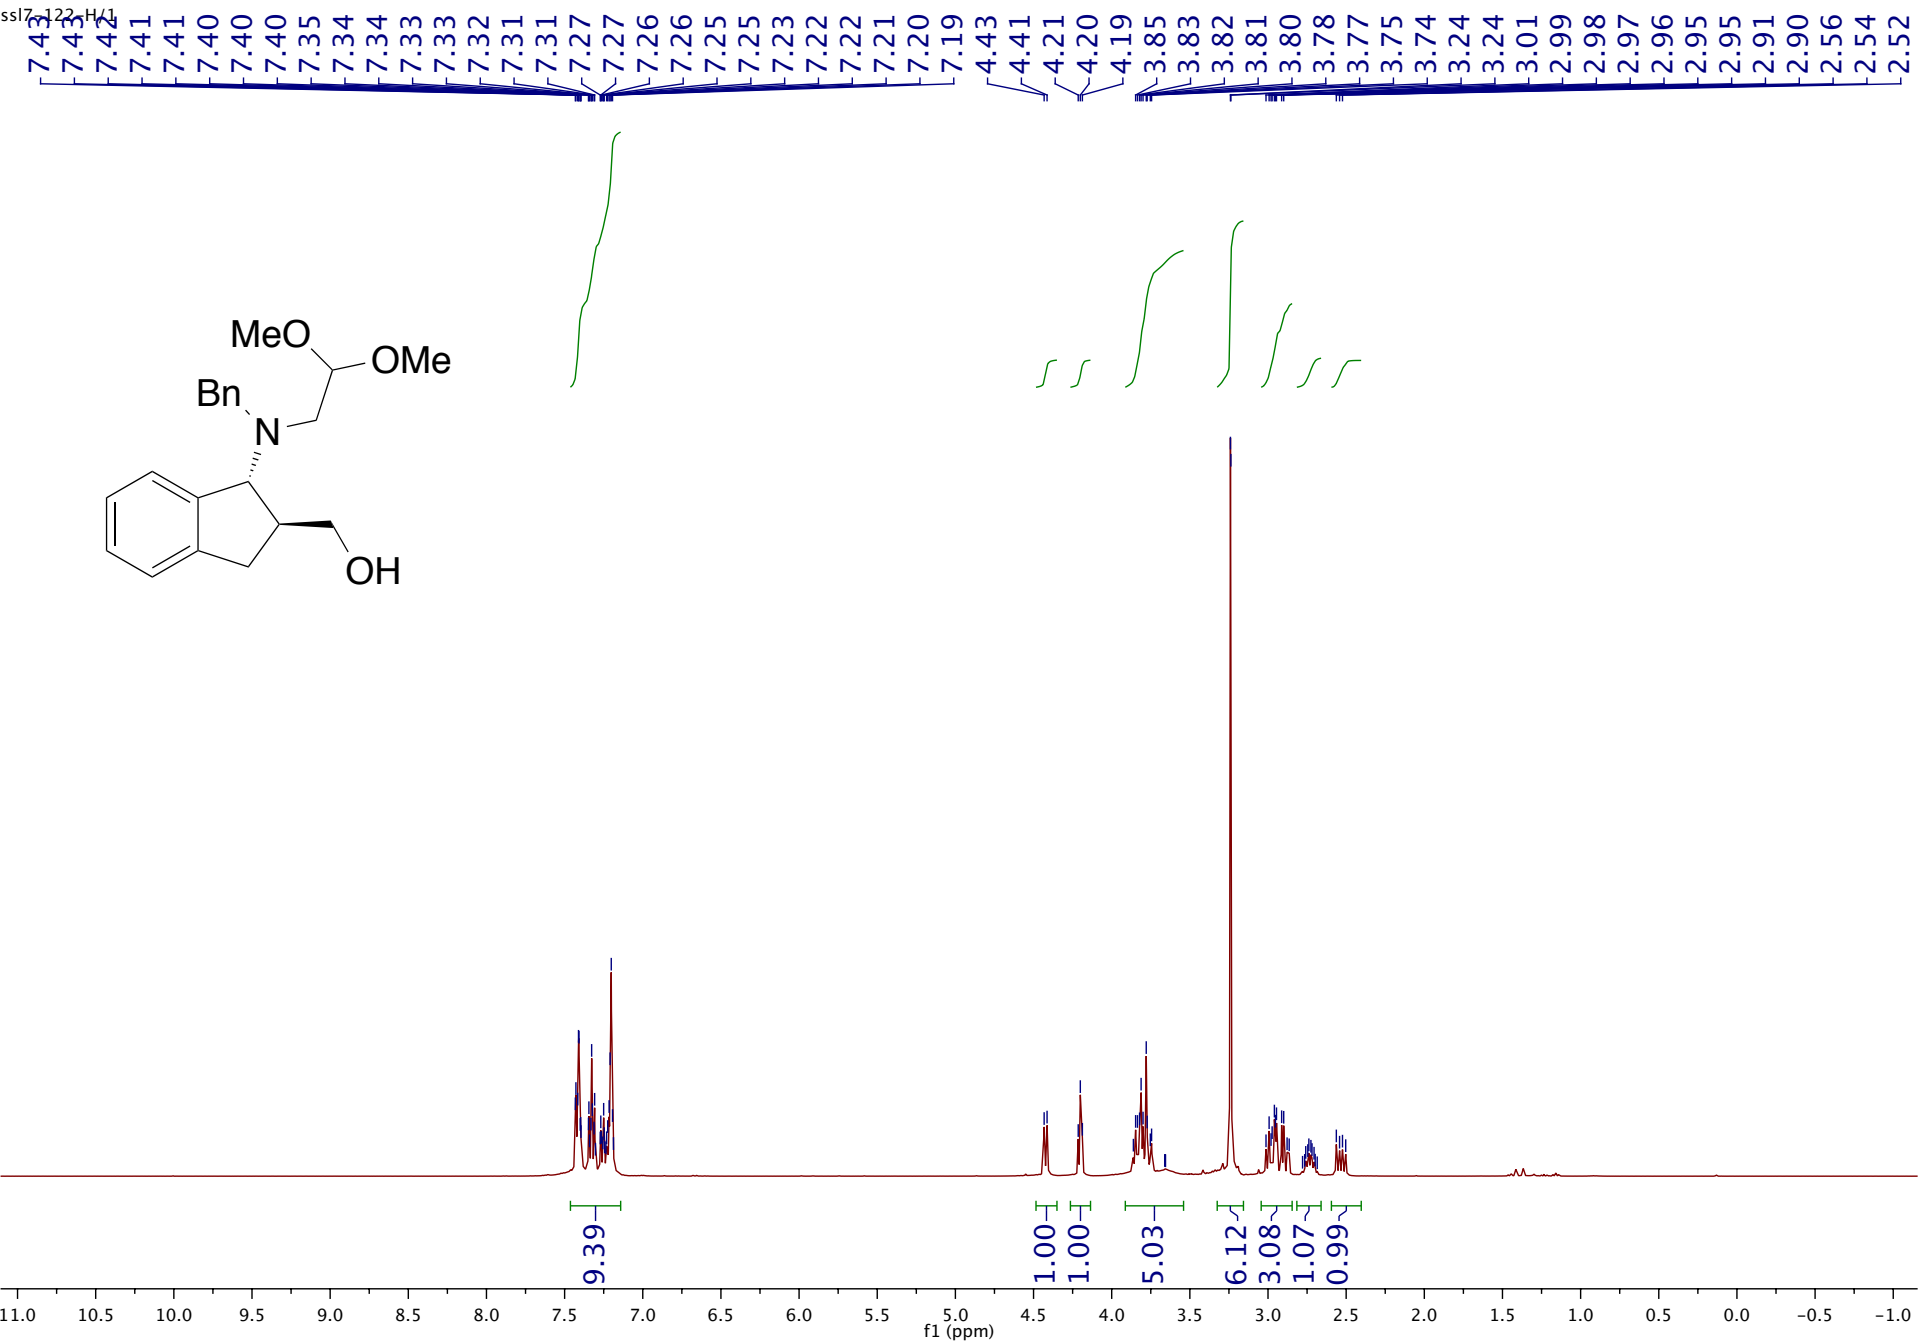

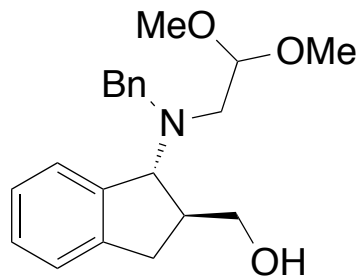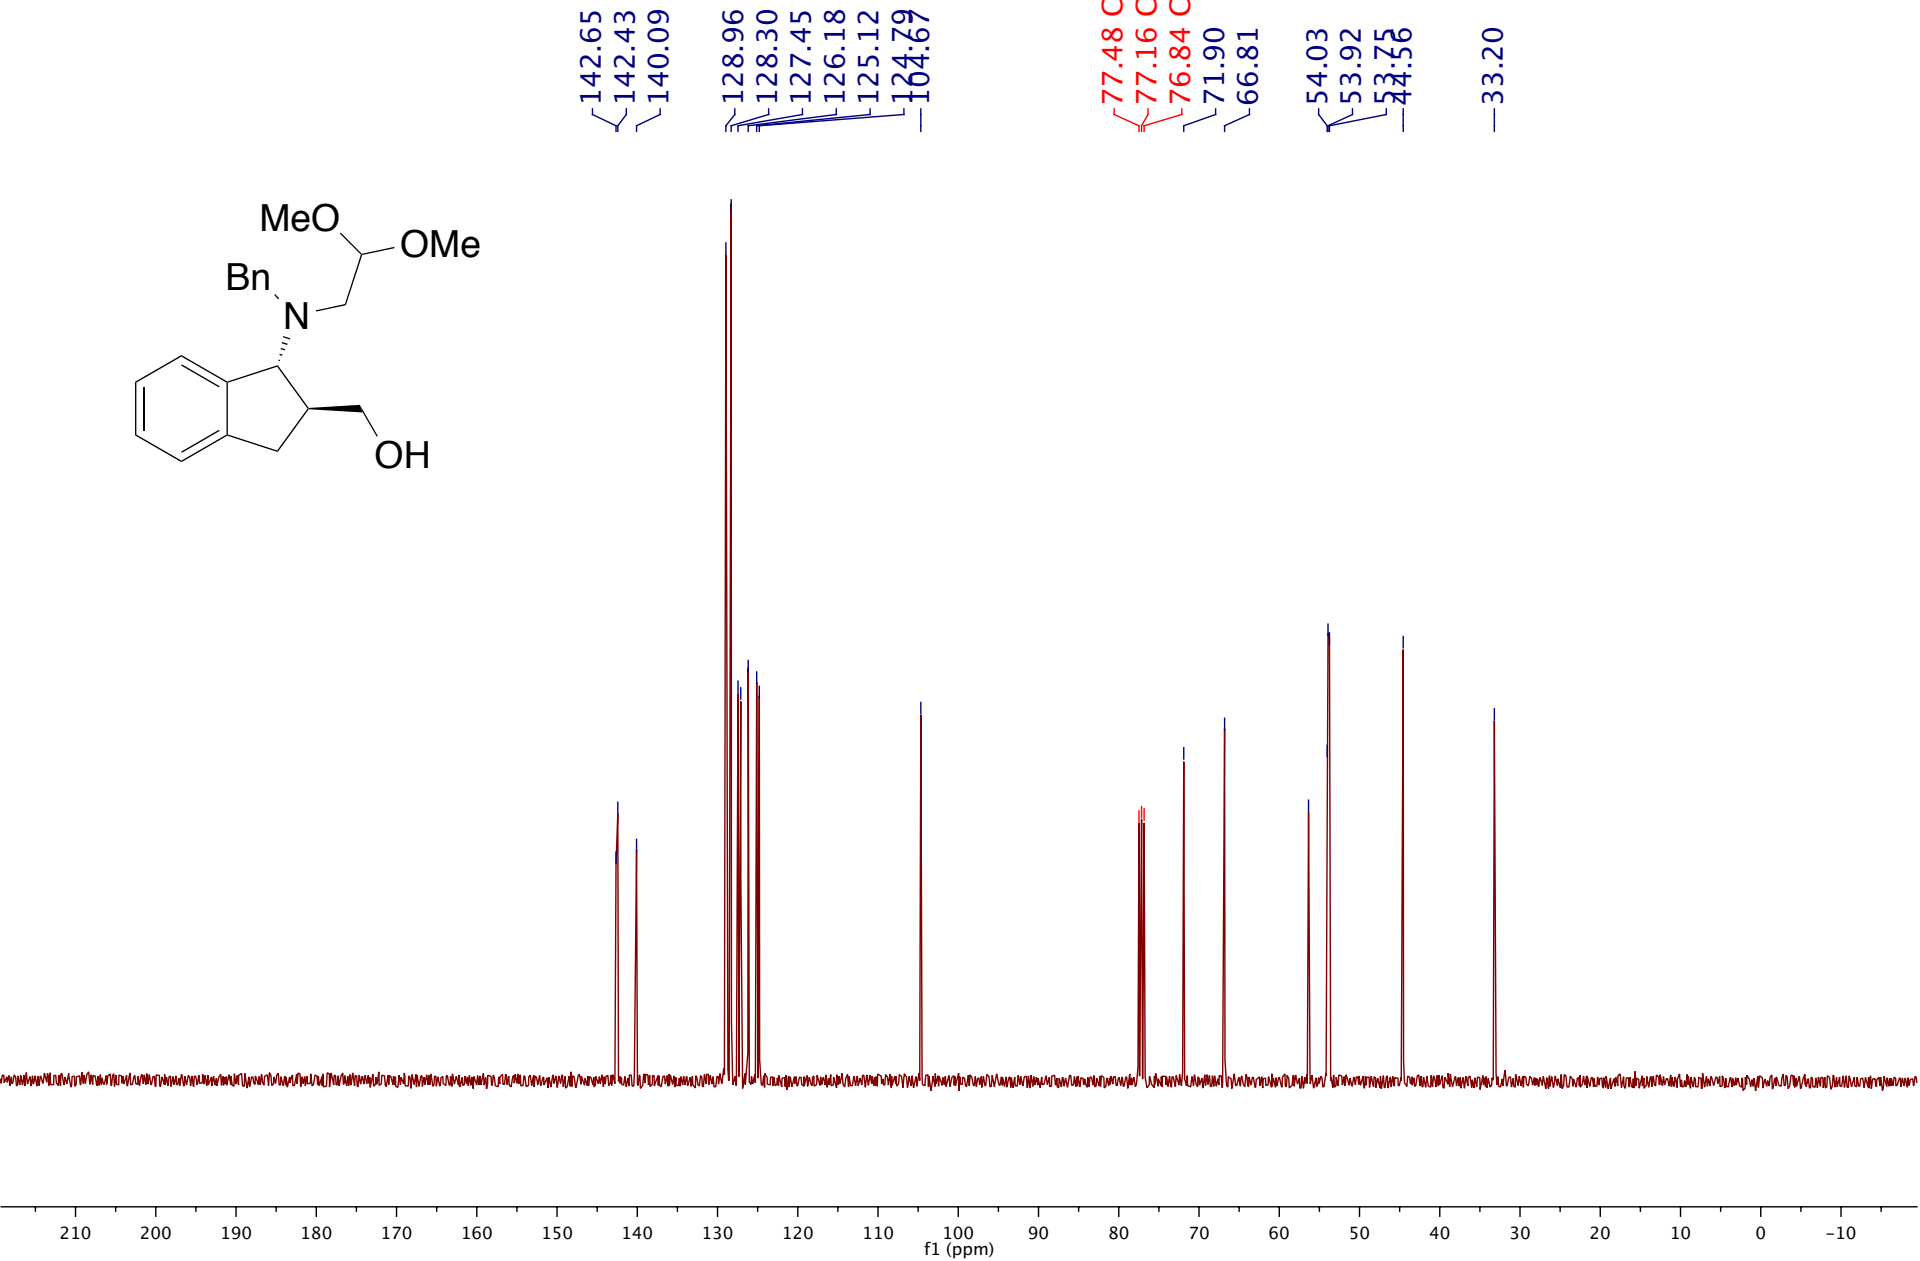

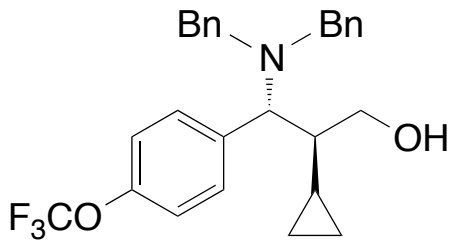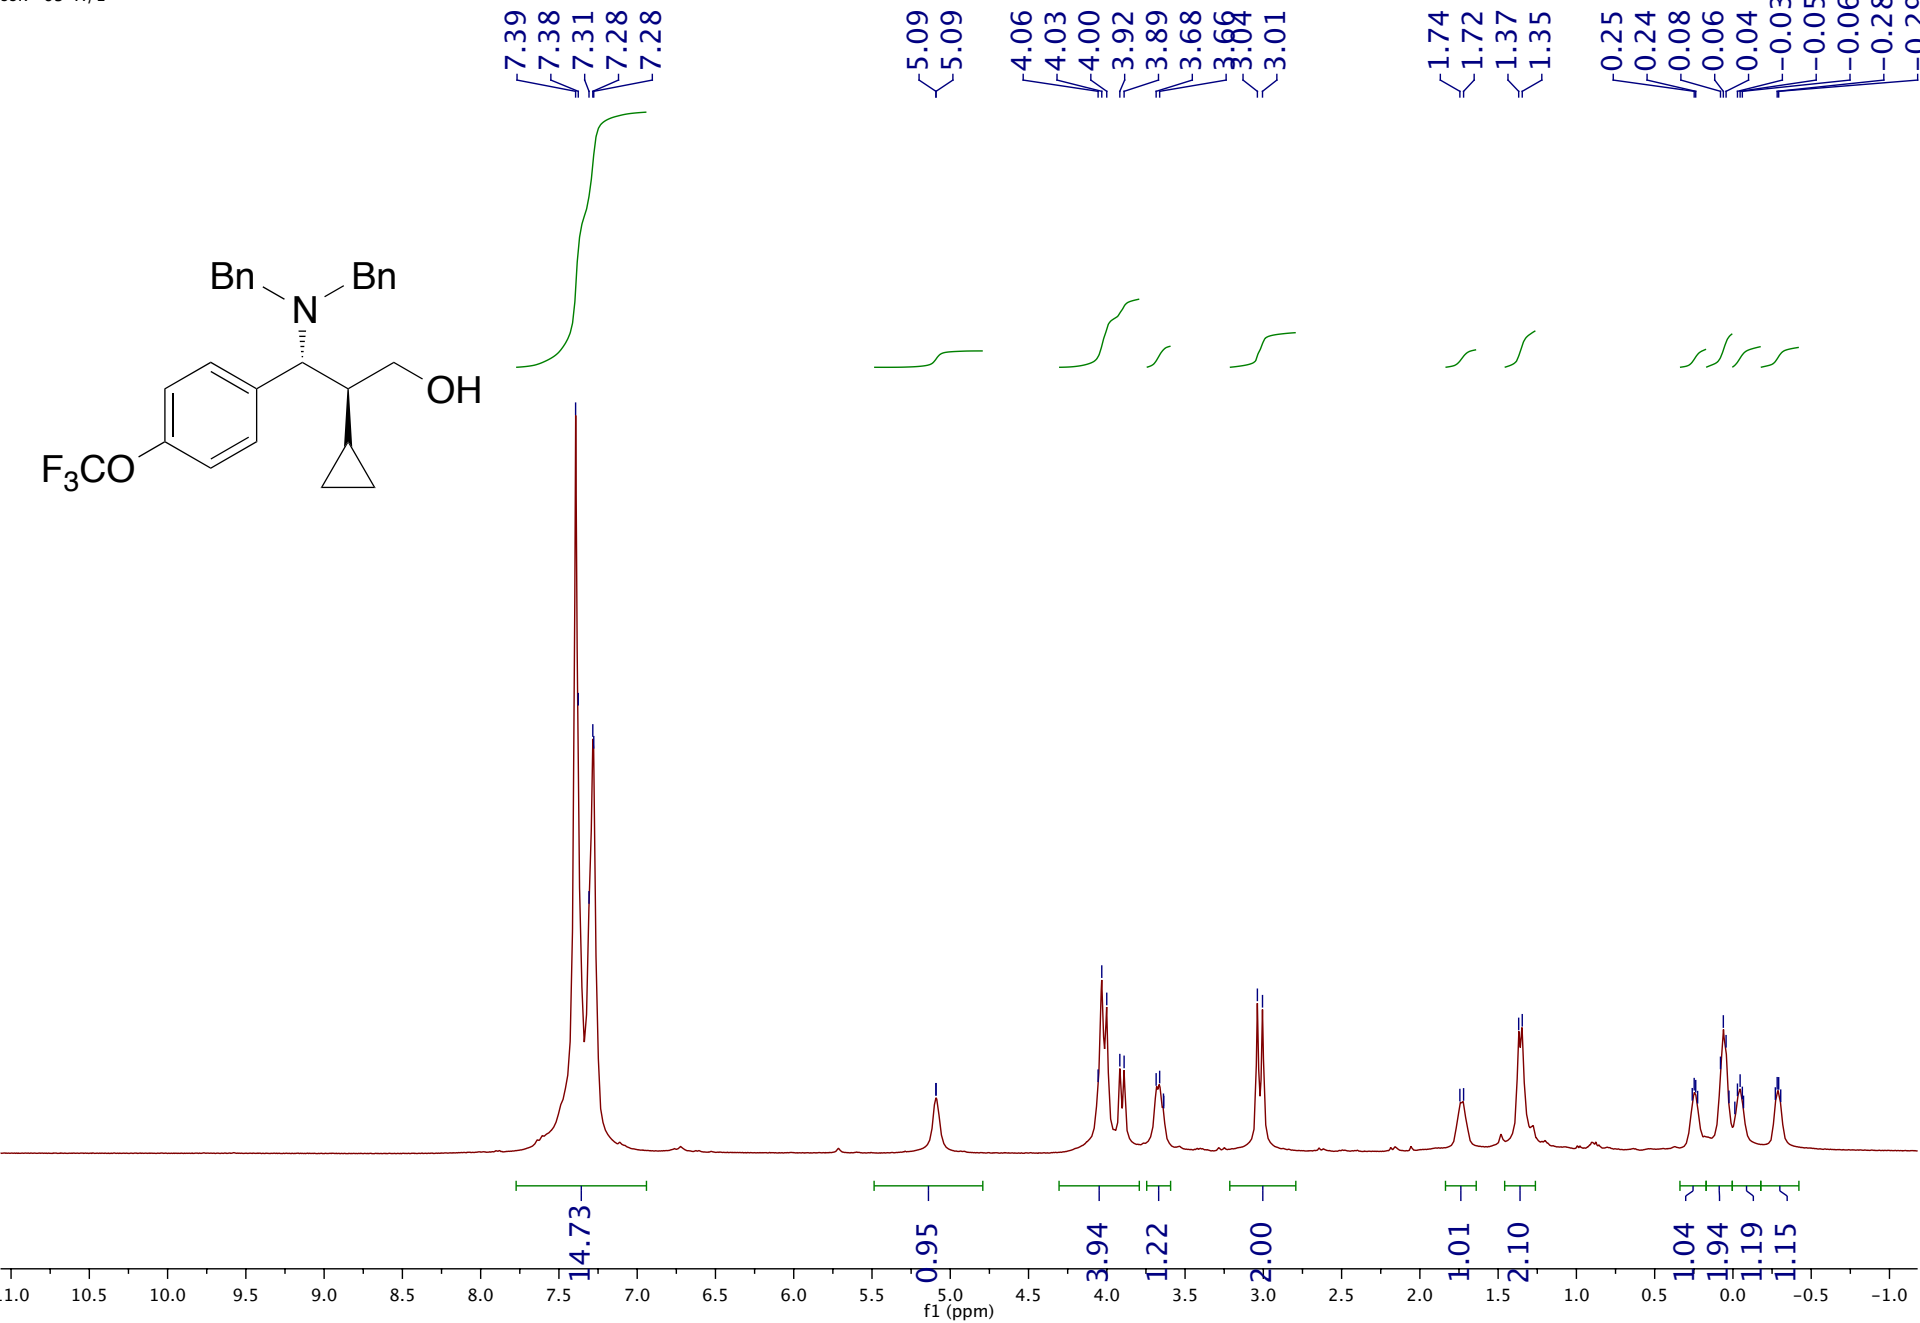

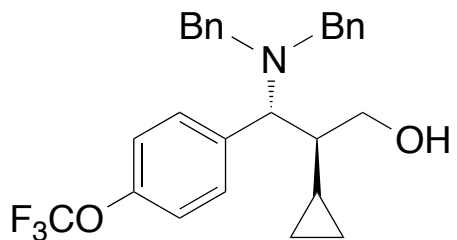

- 148.61
- 148.59
- 138.39
- 133.29
- 131.91
- 129.23
- 128.86
- 127.61
- 121.92
- 120.05
- 119.36
- 77.48 CDCl3
- 77.16 CDCl3
- 76.84 CDCl3
- 67.91
- 67.79
- 54.22
- 44.32
- 32.05
- 12.68
- 6.85
- 2.74

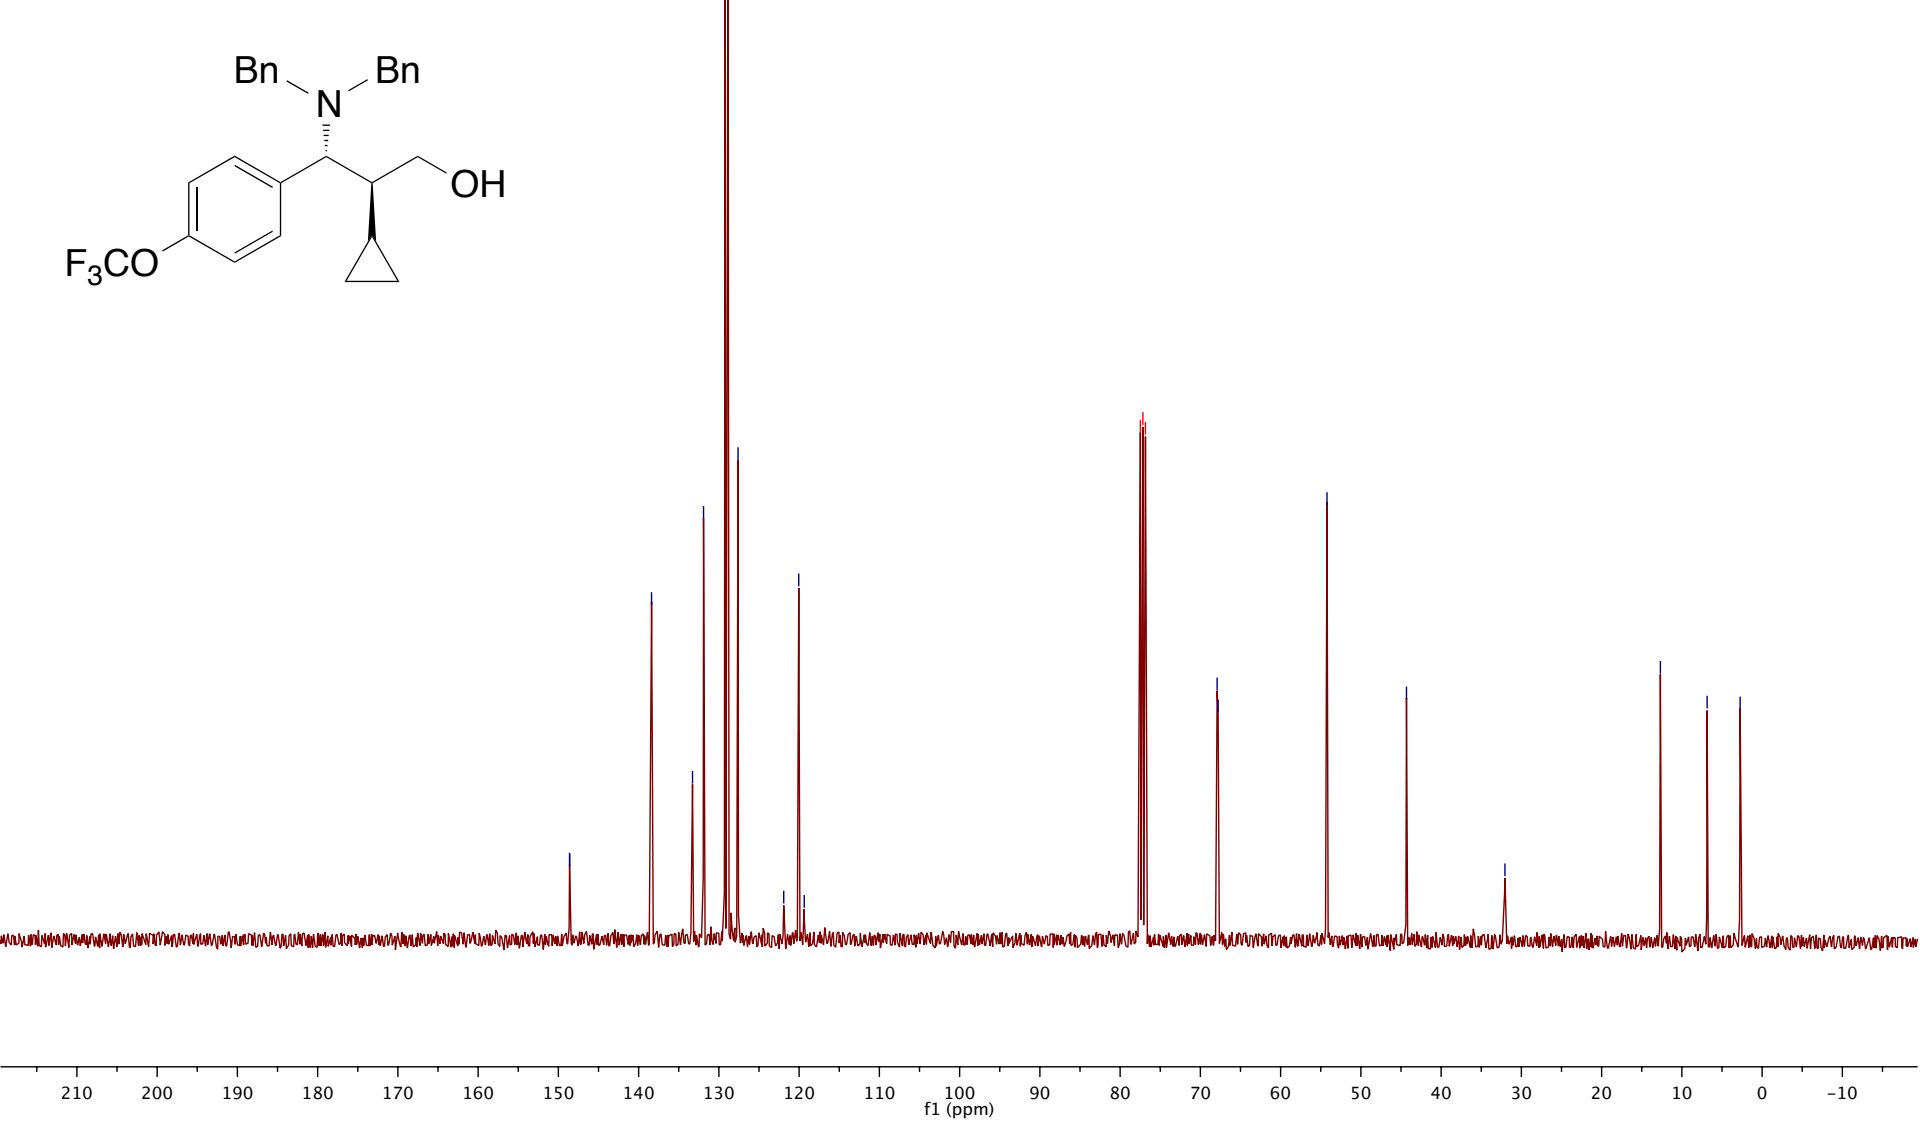

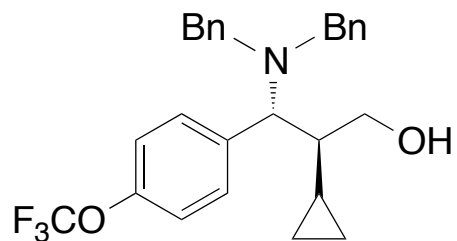

57.71

10 0 -10 -20 -30 -40 -50 -60 -70 -80 -90 -100 -110 -120 -130 -140 -150 -160 -170 -180 -190 -200 -210

f1 (ppm)

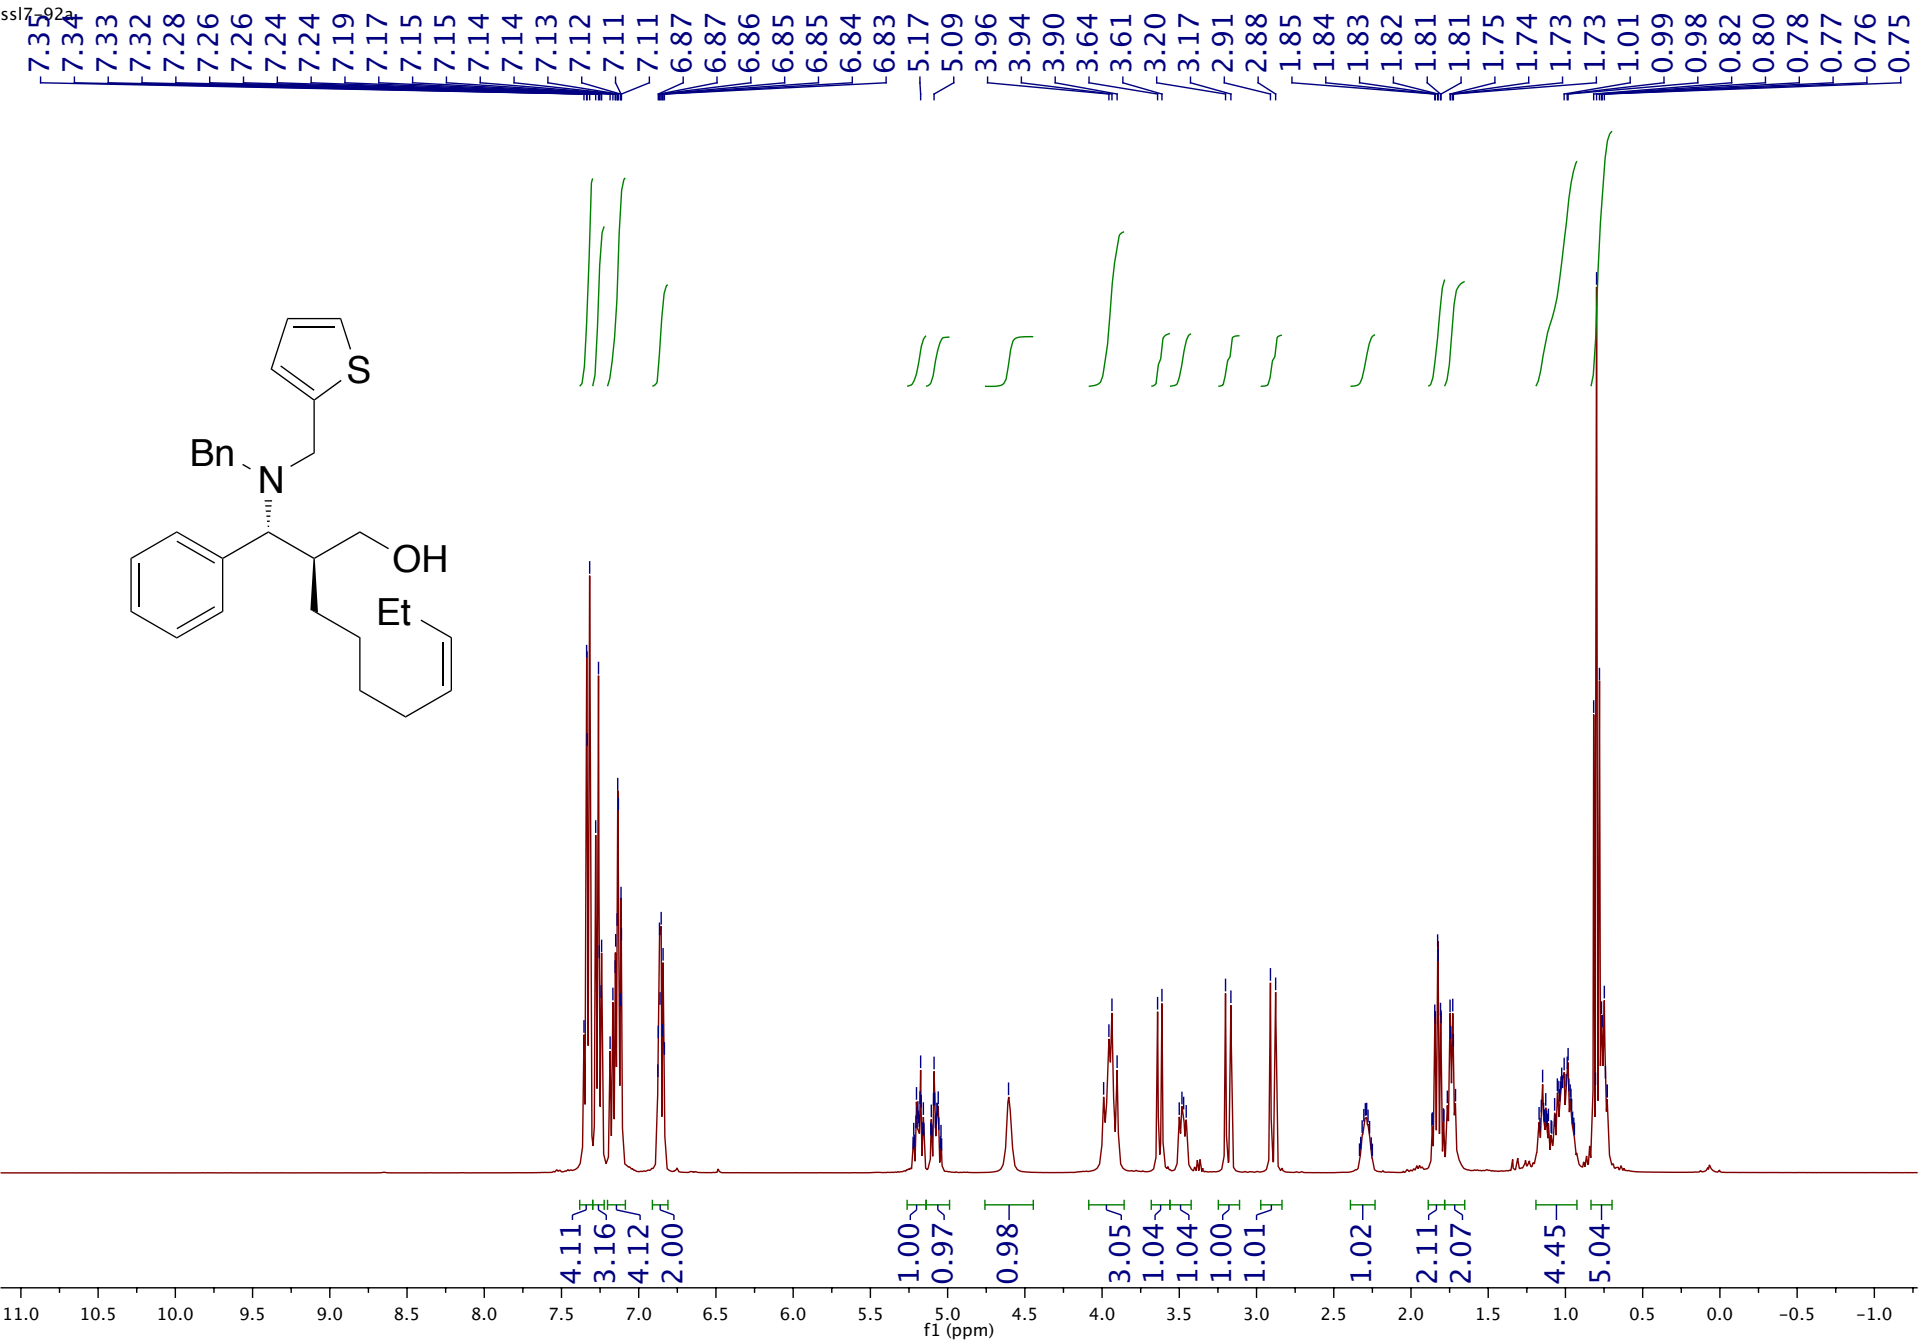



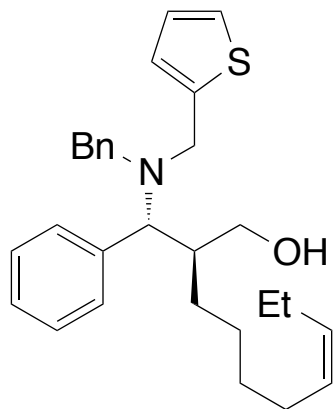

- 142.40
- 138.61
- 134.35
- 131.66
- 130.06
- 129.02
- 128.95
- 128.79
- 128.19
- 127.65
- 127.45
- 126.83
- 126.74
- 125.24
- 77.48 CDCl3
- 77.16 CDCl3
- 76.84 CDCl3
- 67.12
- 65.50
- 53.97
- 48.95
- 39.42
- 29.70
- 28.76
- 26.85
- 26.65
- 20.50
- 14.44

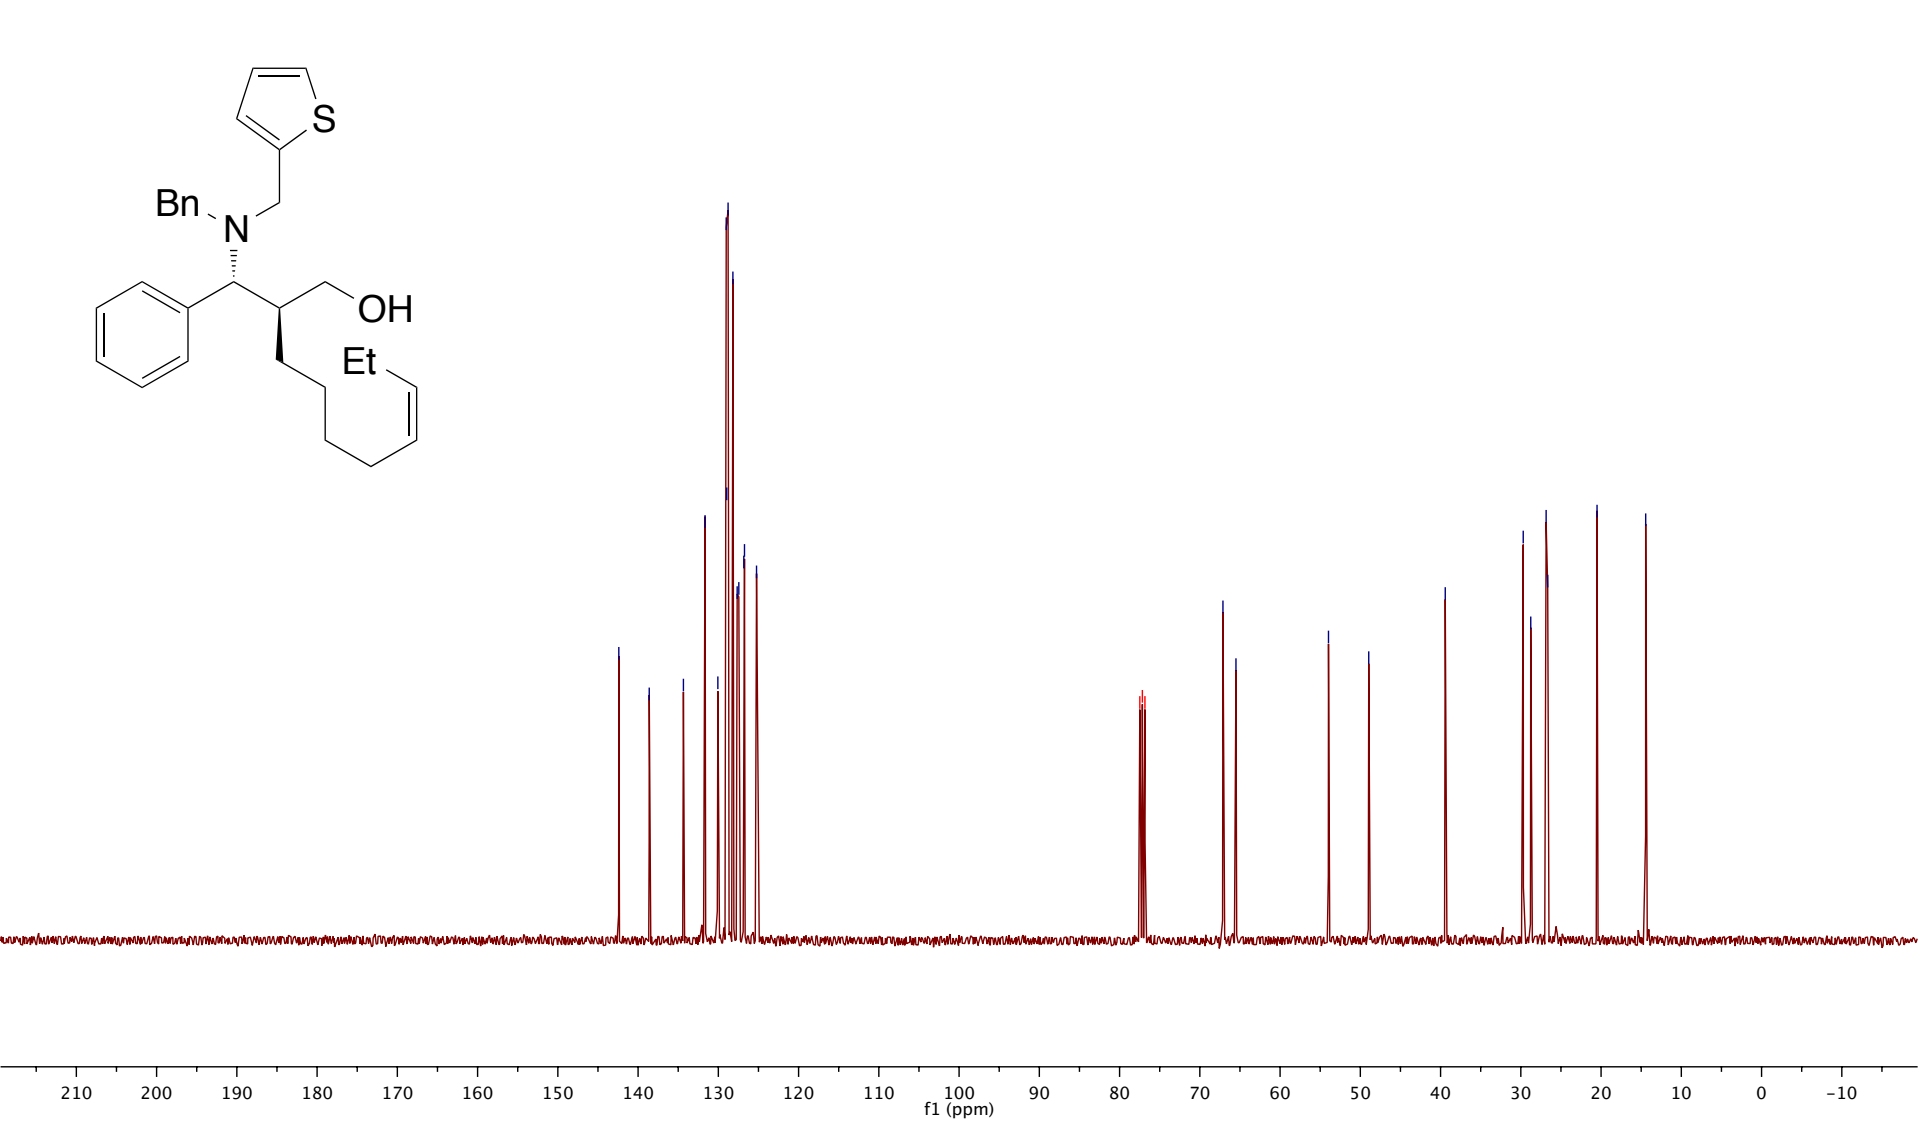

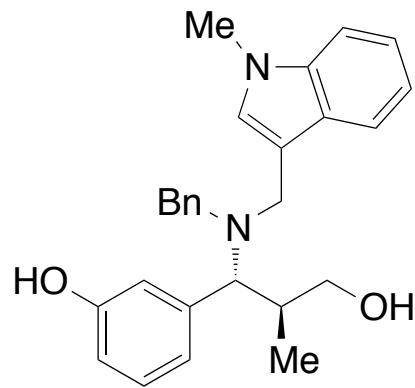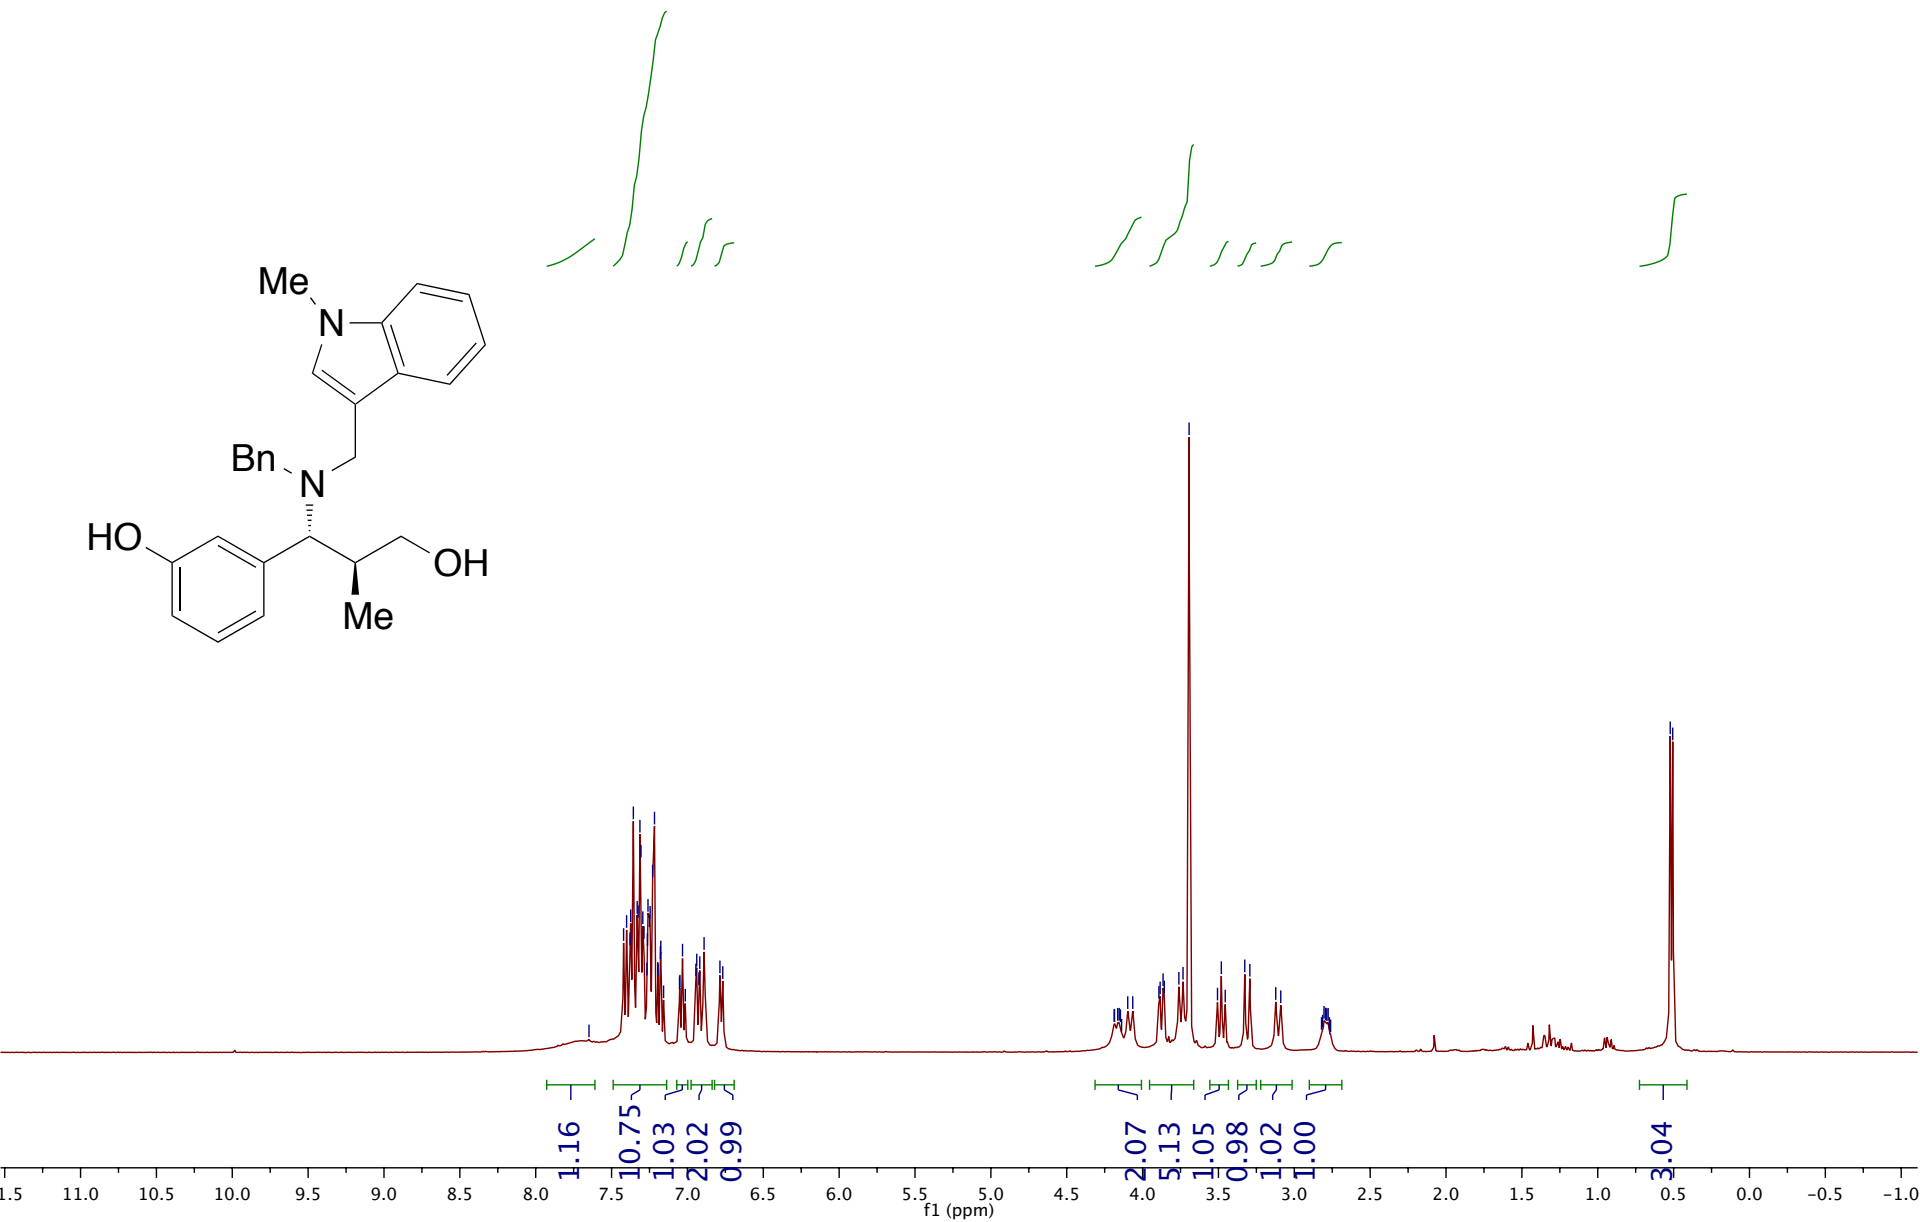

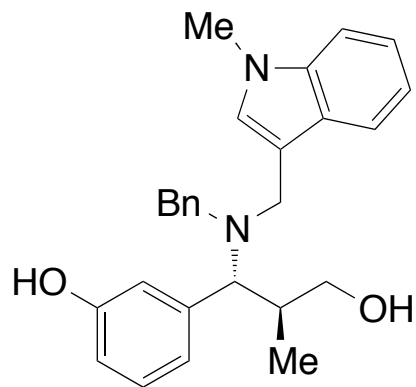

- 156.68
- 138.49
- 136.85
- 135.75
- 129.43
- 129.27
- 128.74
- 128.71
- 128.52
- 127.36
- 122.49
- 121.68
- 119.26
- 118.70
- 115.02
- 110.56
- 109.35
- 77.48 CDCl<sub>3</sub>
- 77.16 CDCl<sub>3</sub>
- 76.84 CDCl<sub>3</sub>
- 70.13
- 69.78
- 54.71
- 44.58
- 33.83
- 32.83
- 15.21

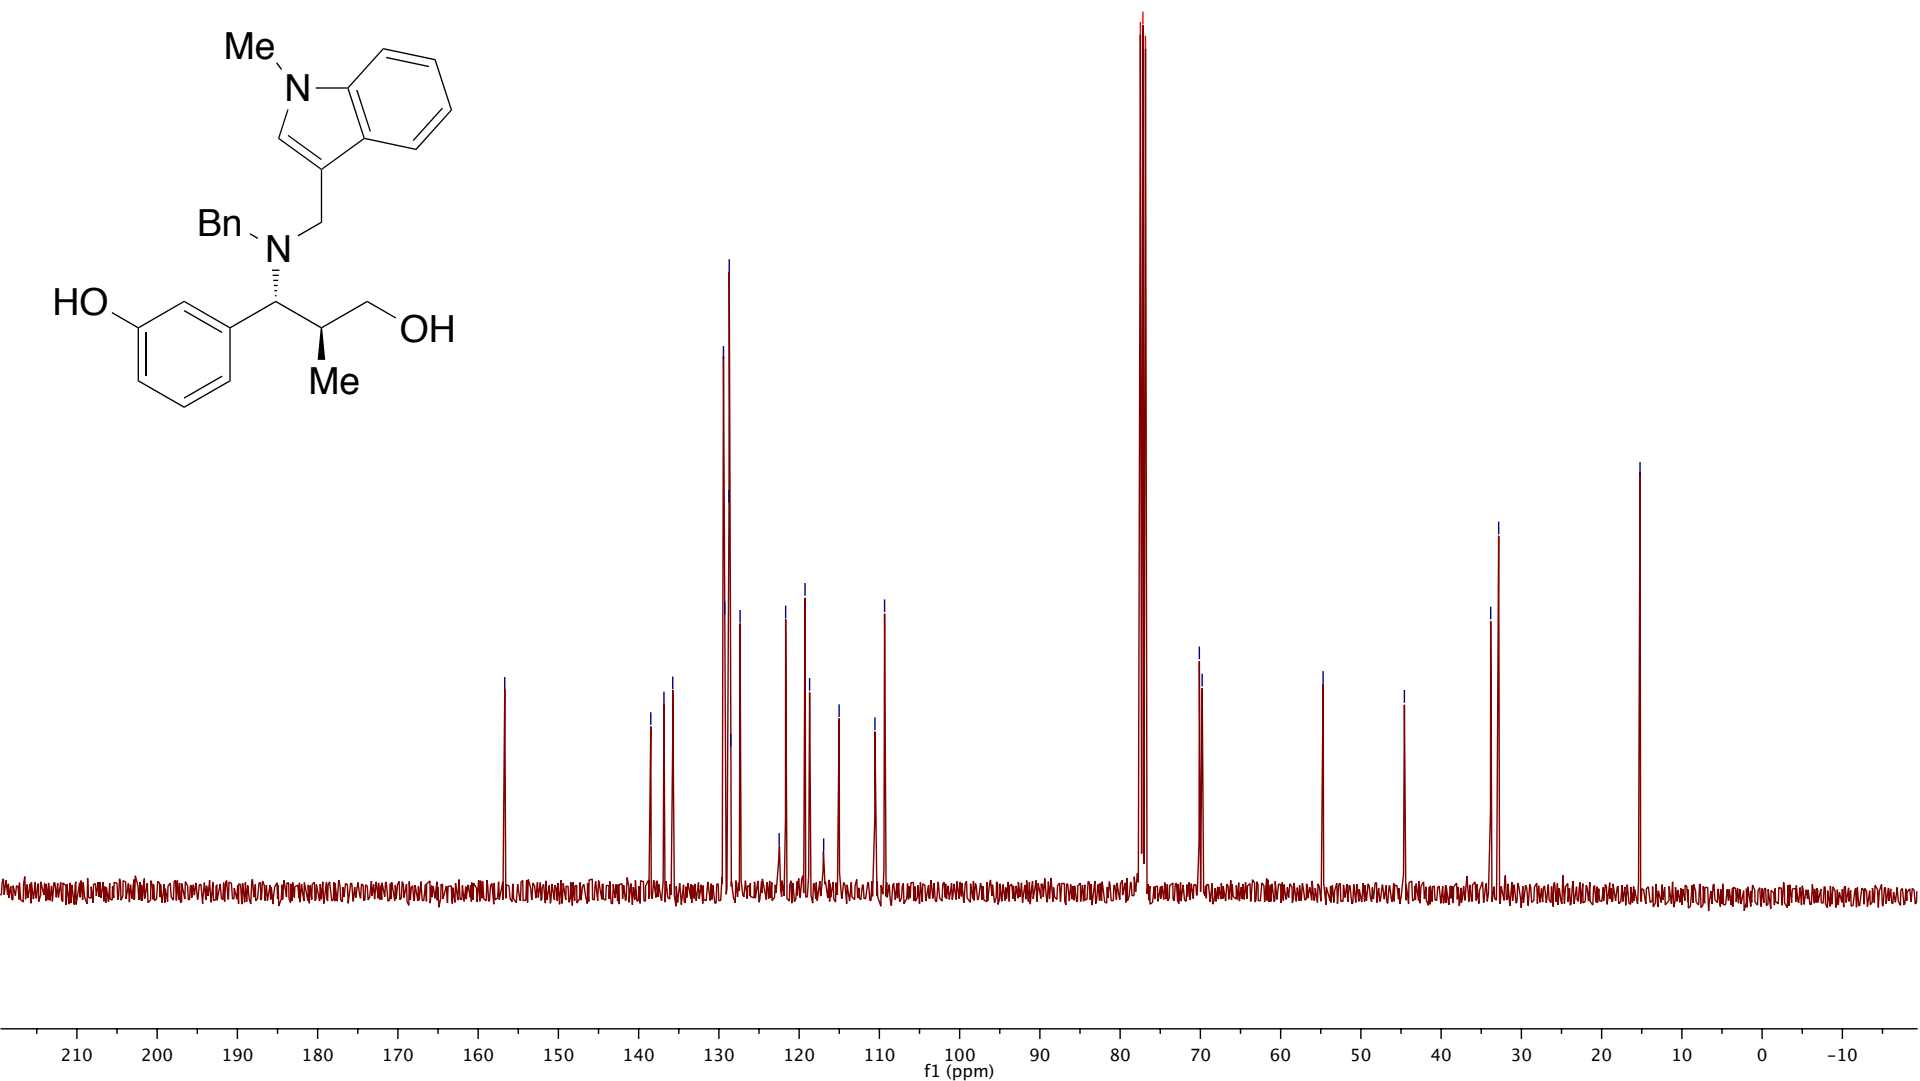

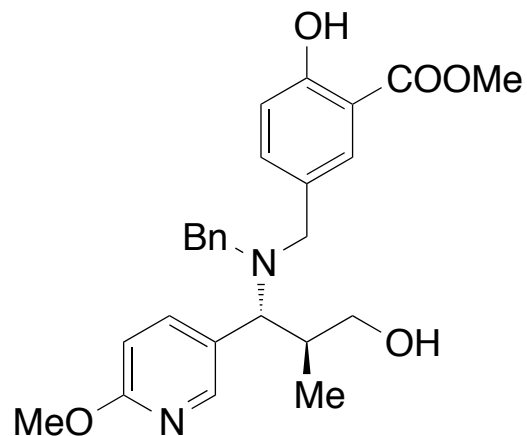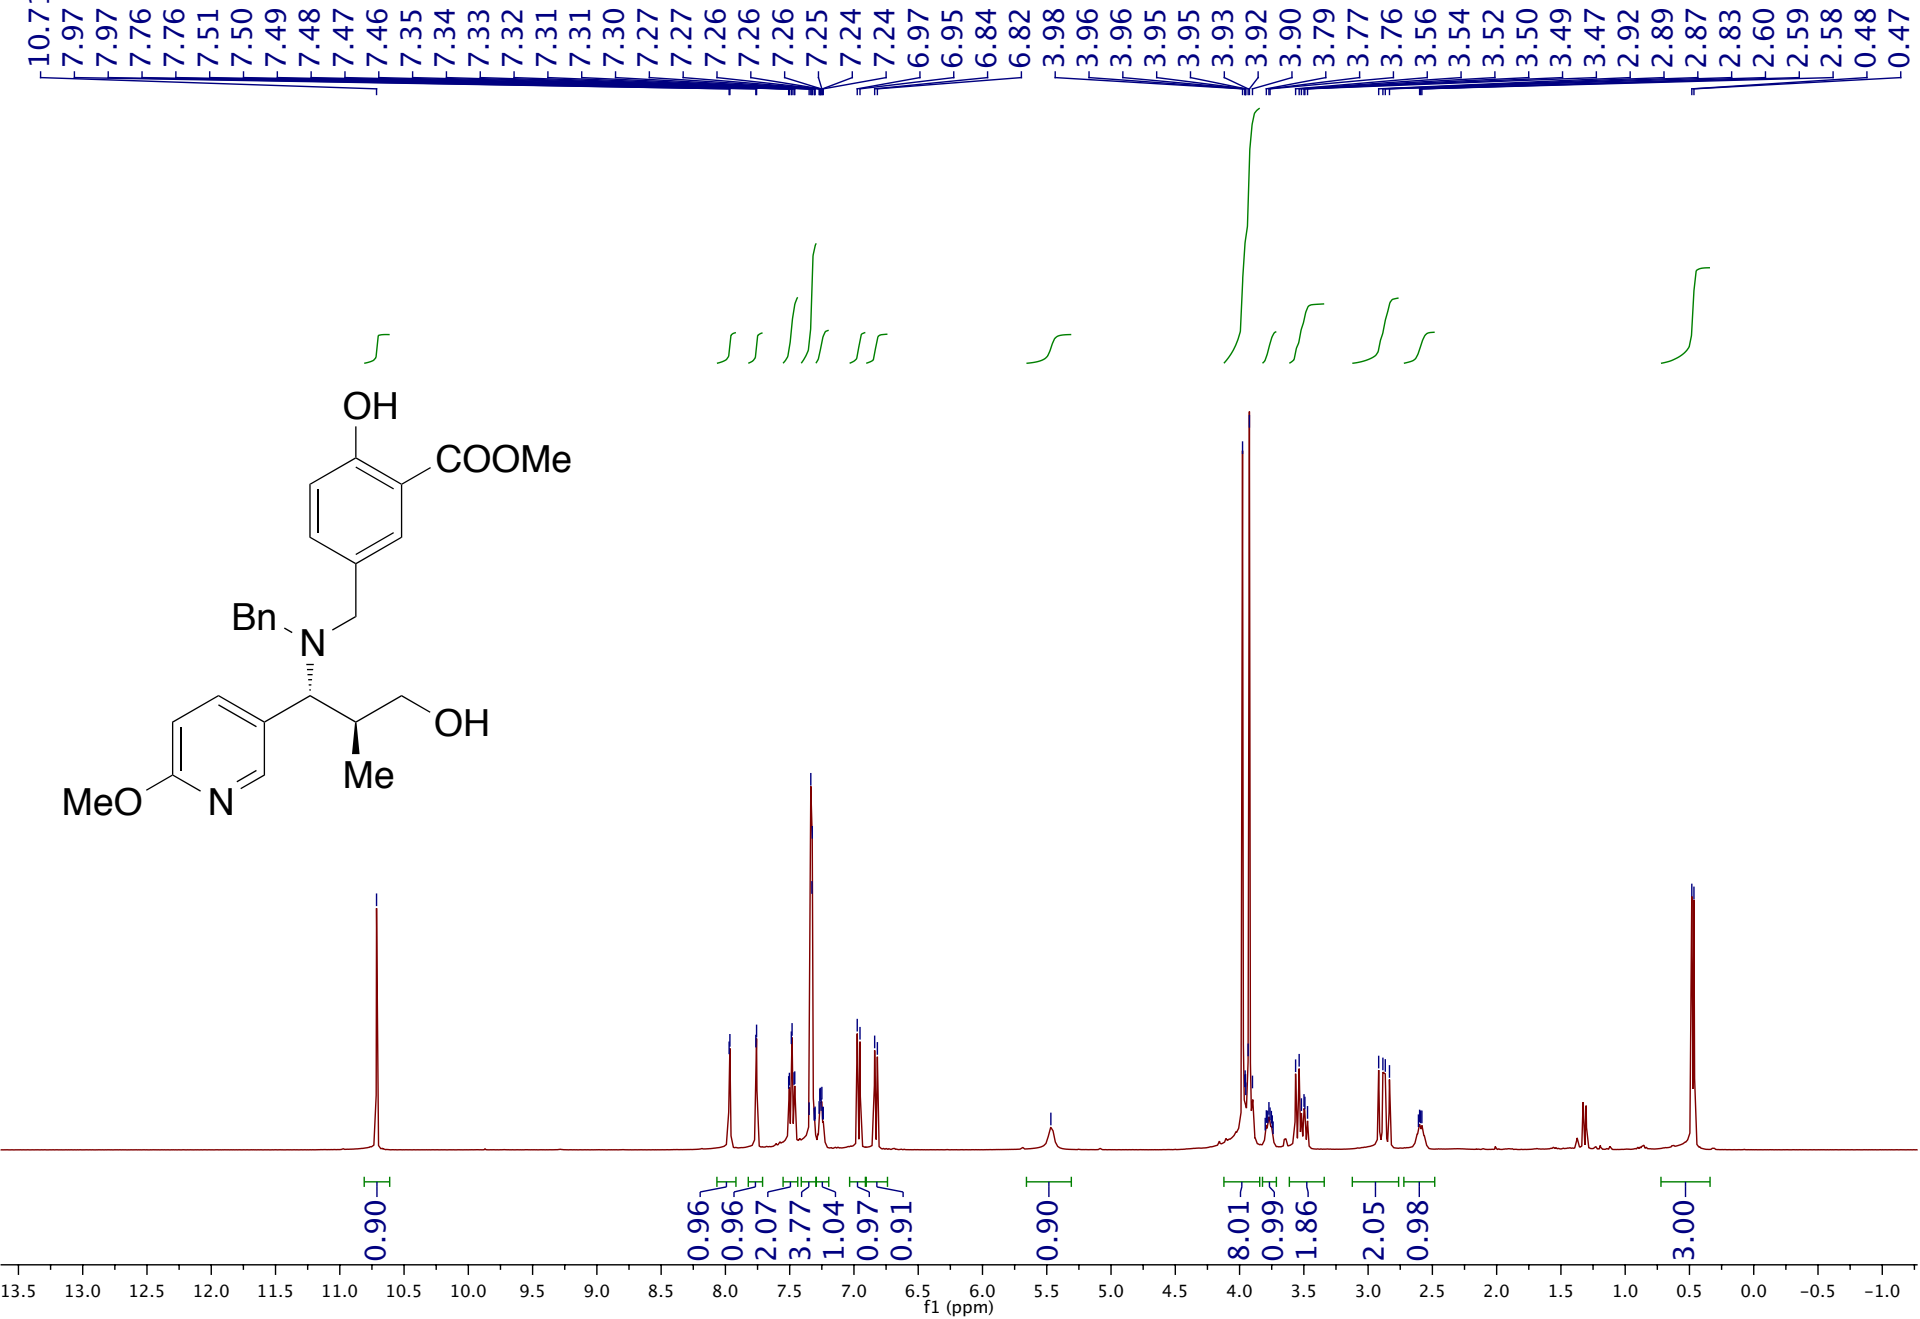

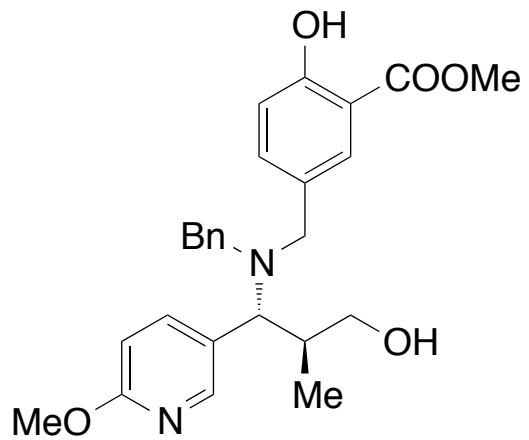

170.37  
163.69  
161.05  
148.09  
139.38  
138.00  
136.59  
130.54  
129.20  
128.82  
128.66  
127.58  
122.53  
118.26  
112.19  
110.73

77.48 CDCl3  
77.16 CDCl3  
76.84 CDCl3  
69.33  
66.00  
53.93  
53.53  
53.16  
52.45

34.00

15.40

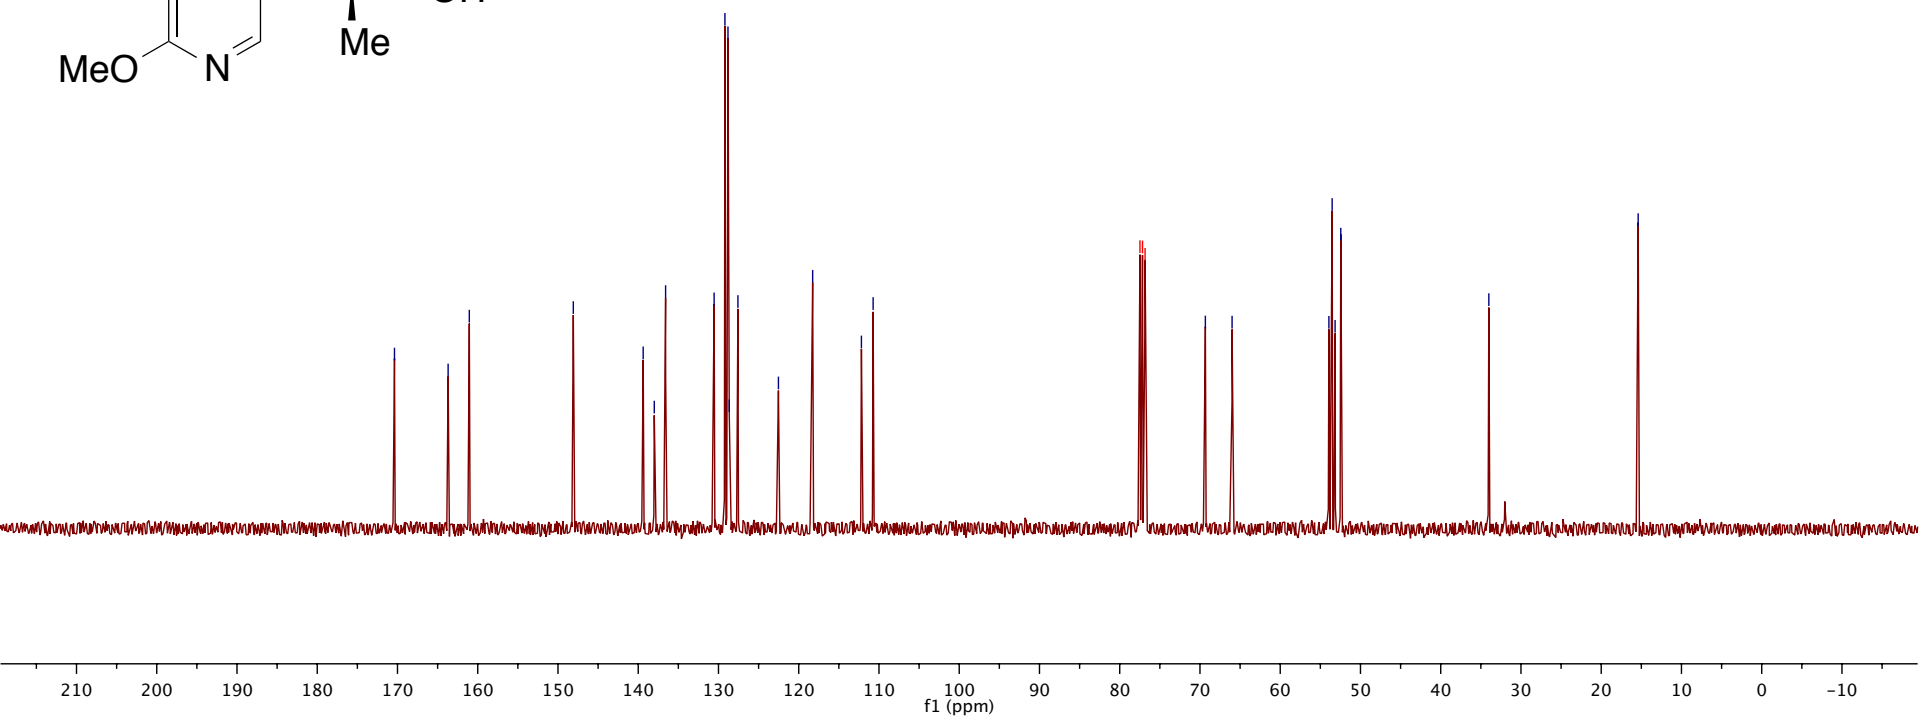

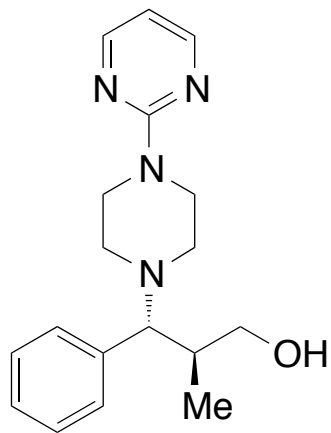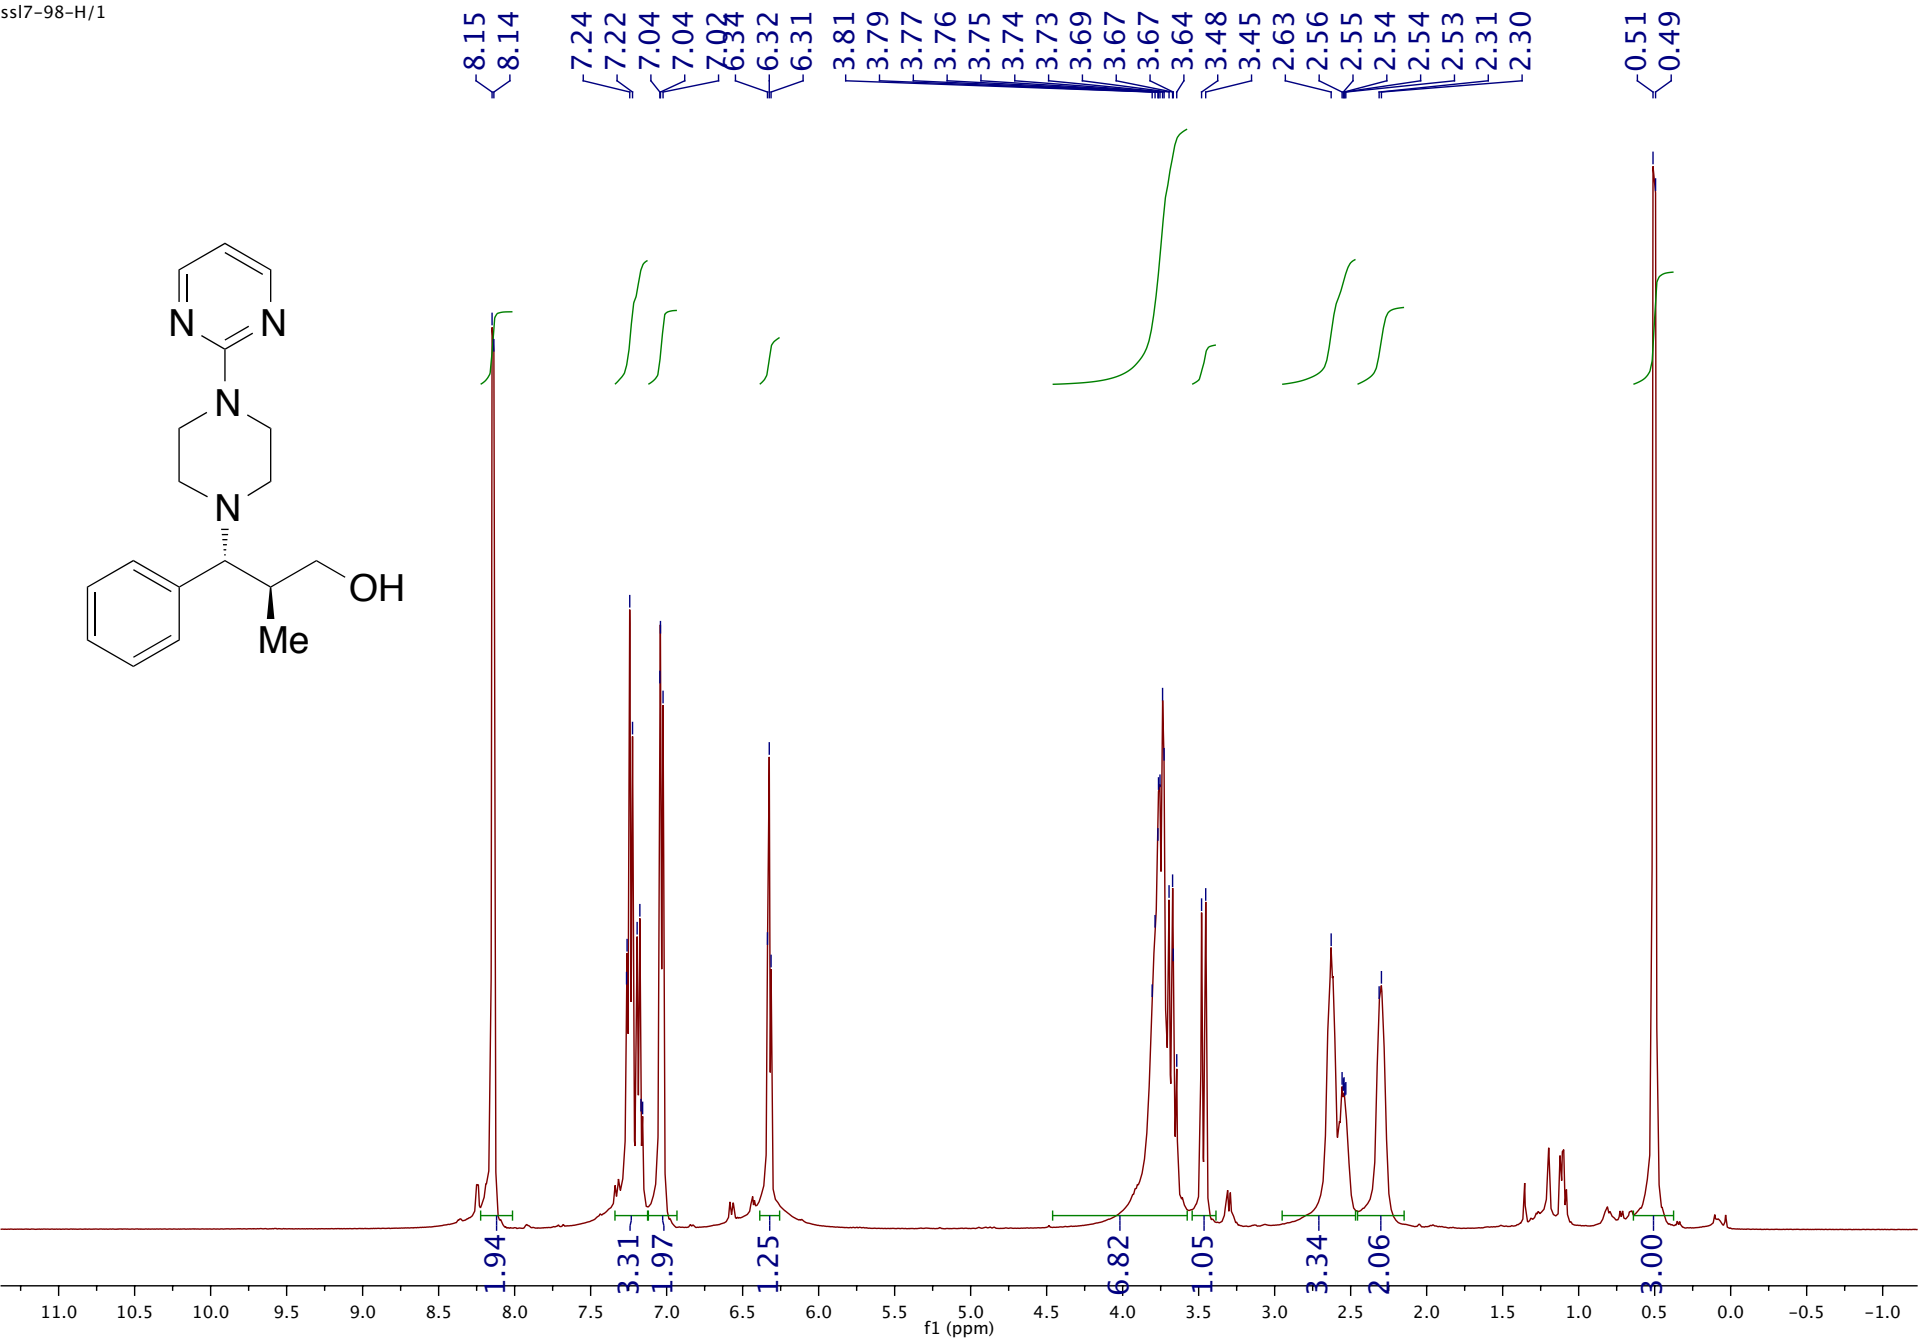

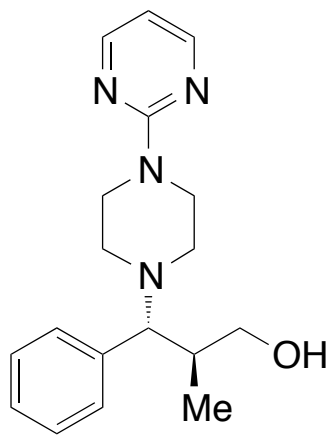

161.13  
157.47

133.79  
129.31  
127.87  
127.47

109.74

77.48 CDCl3  
77.42  
77.16 CDCl3  
76.84 CDCl3  
70.56

49.31

43.48

32.80

14.87

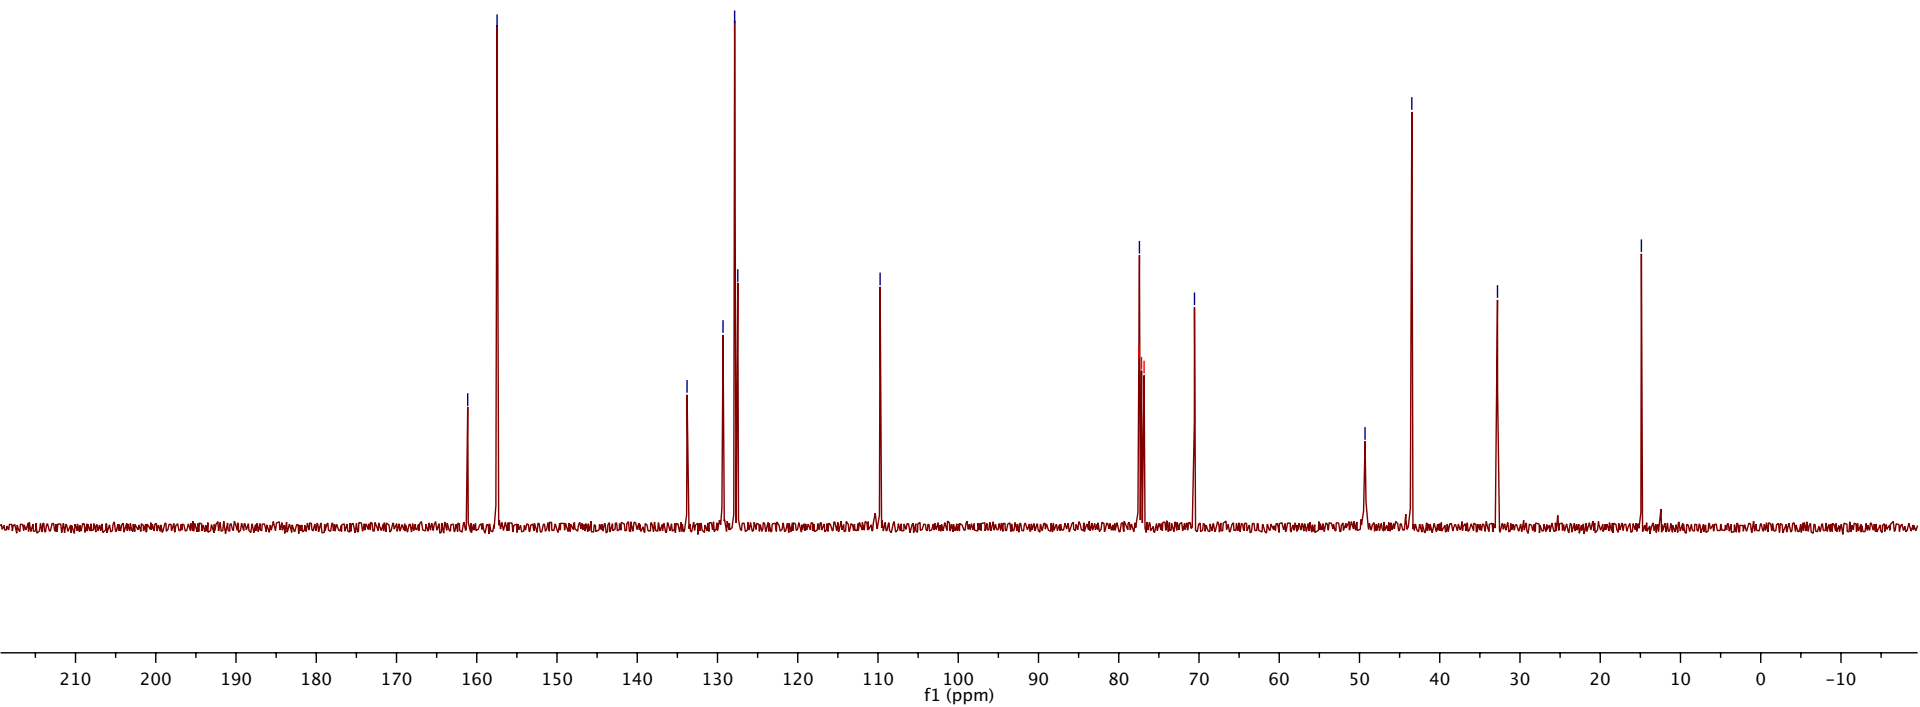

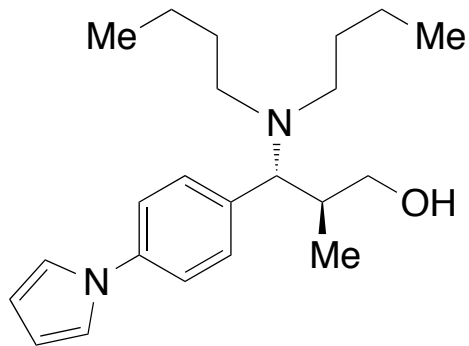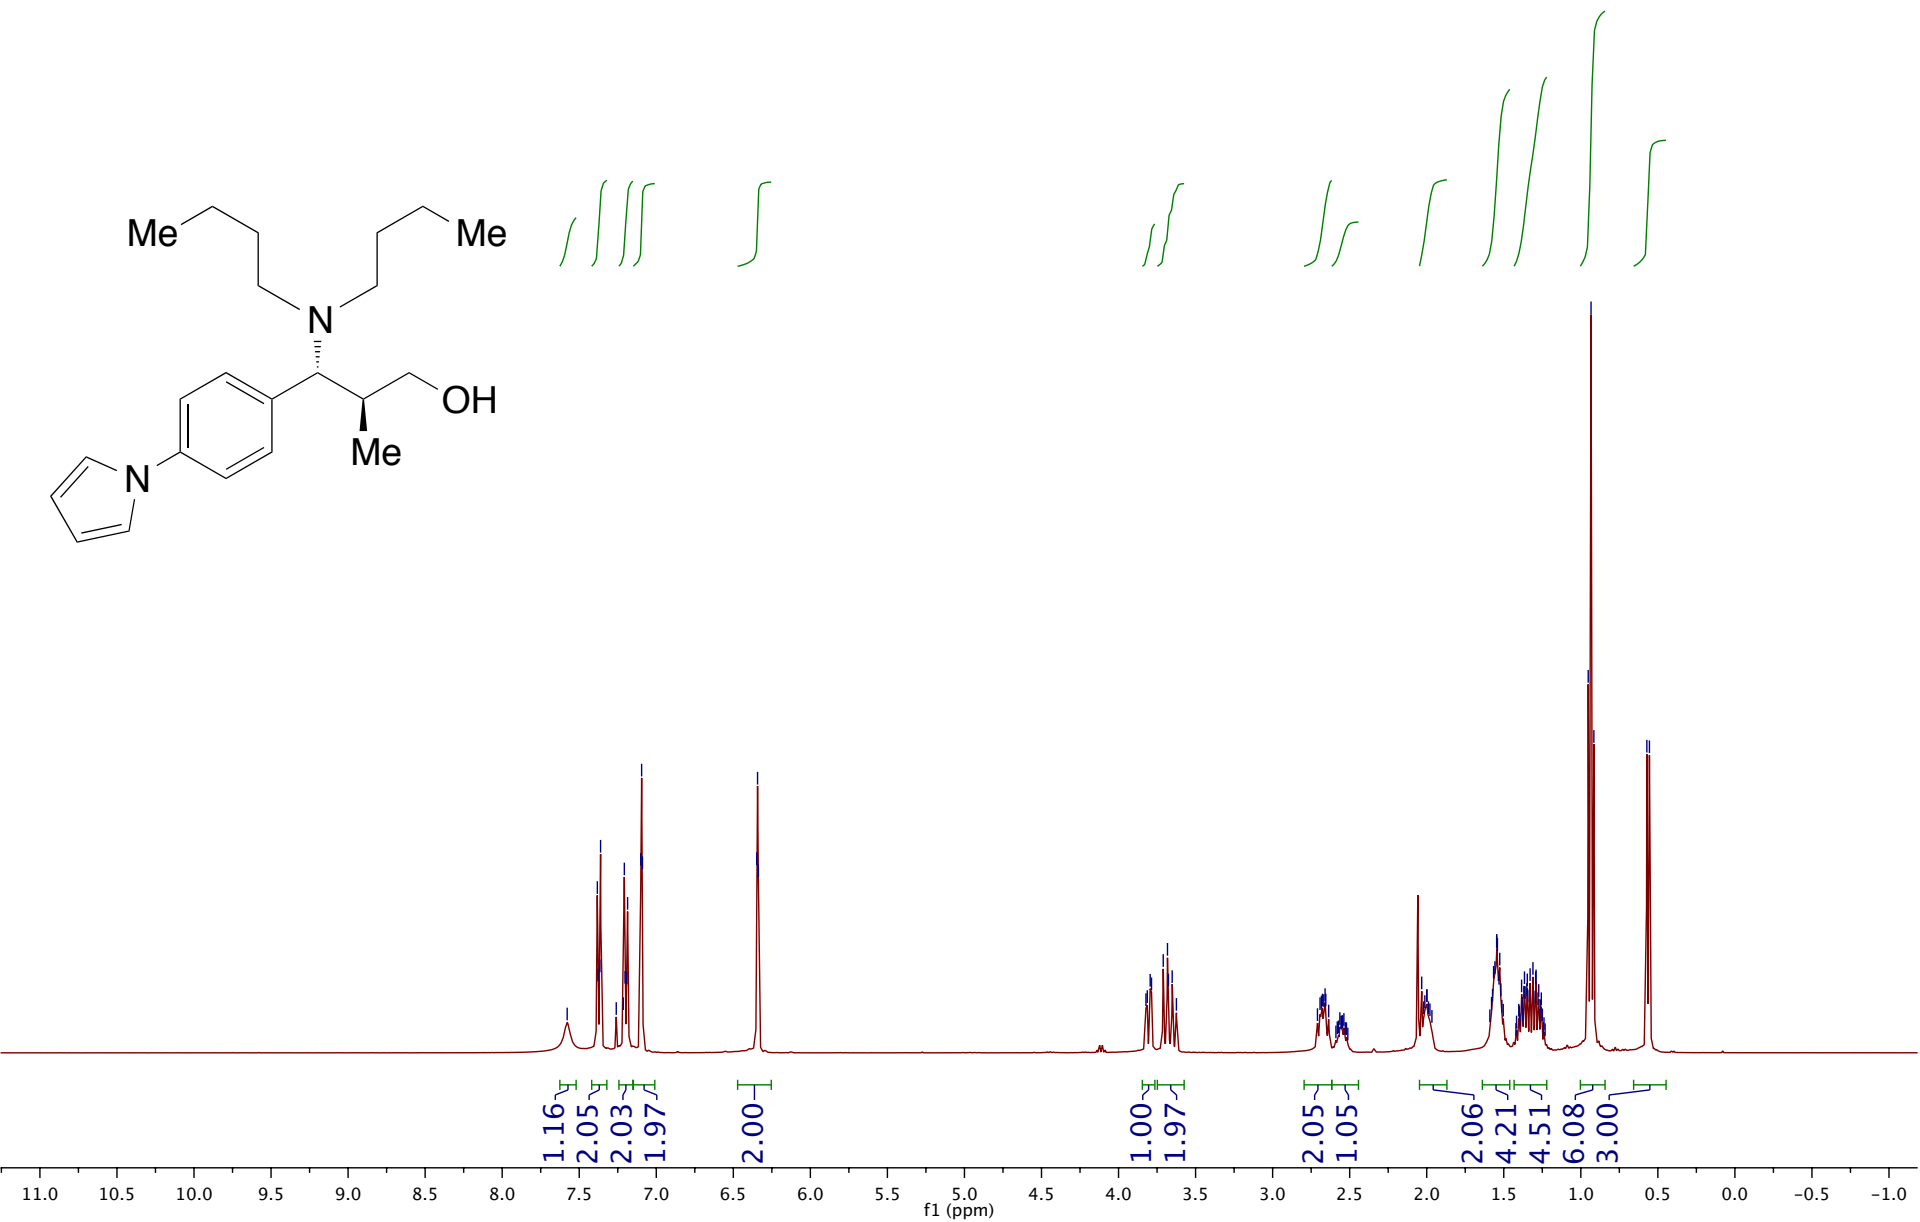



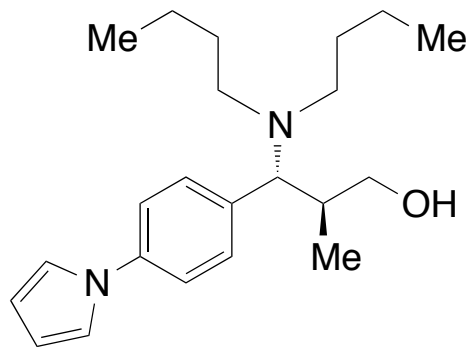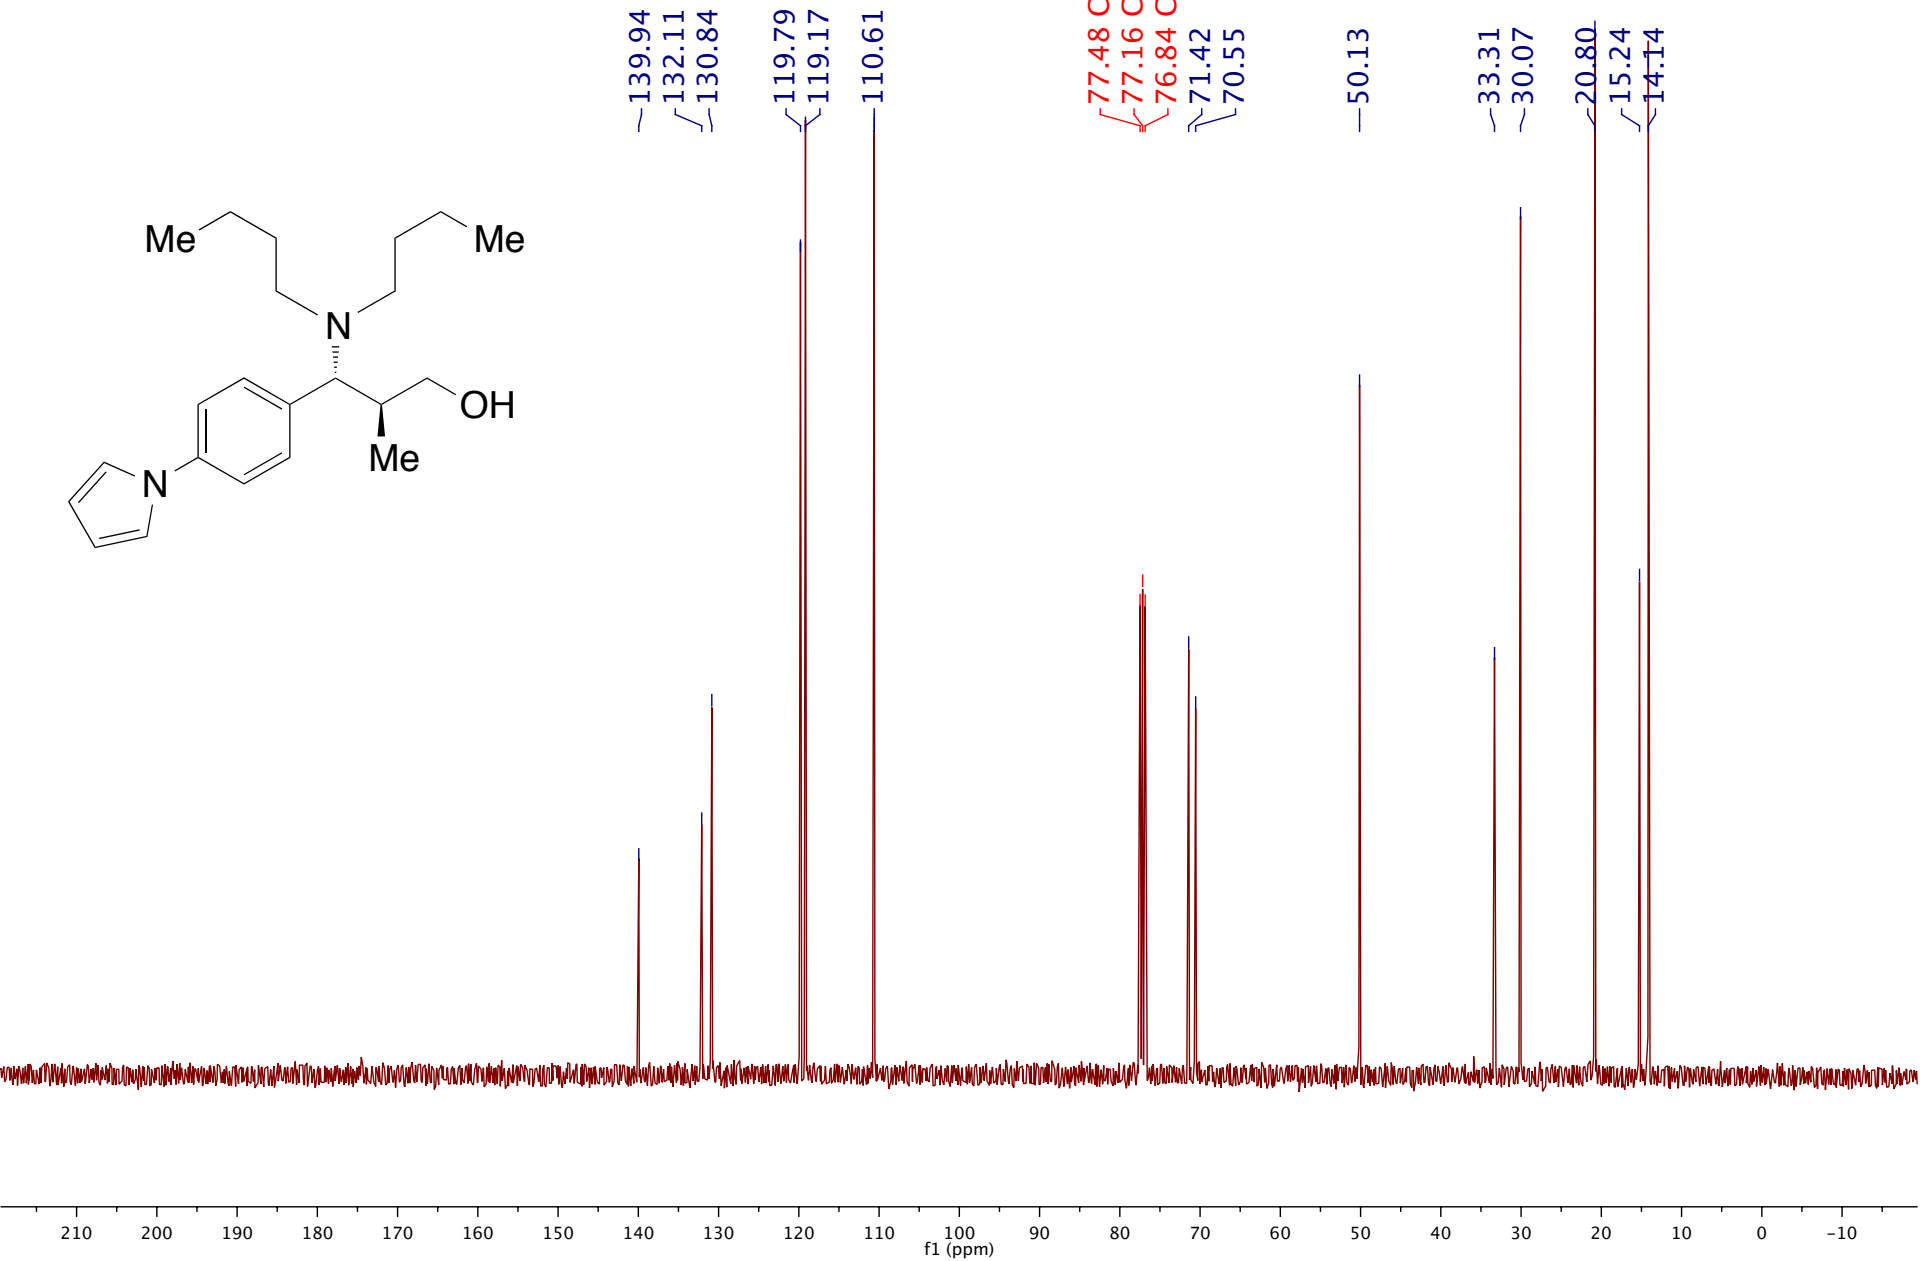

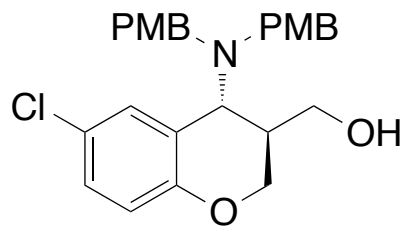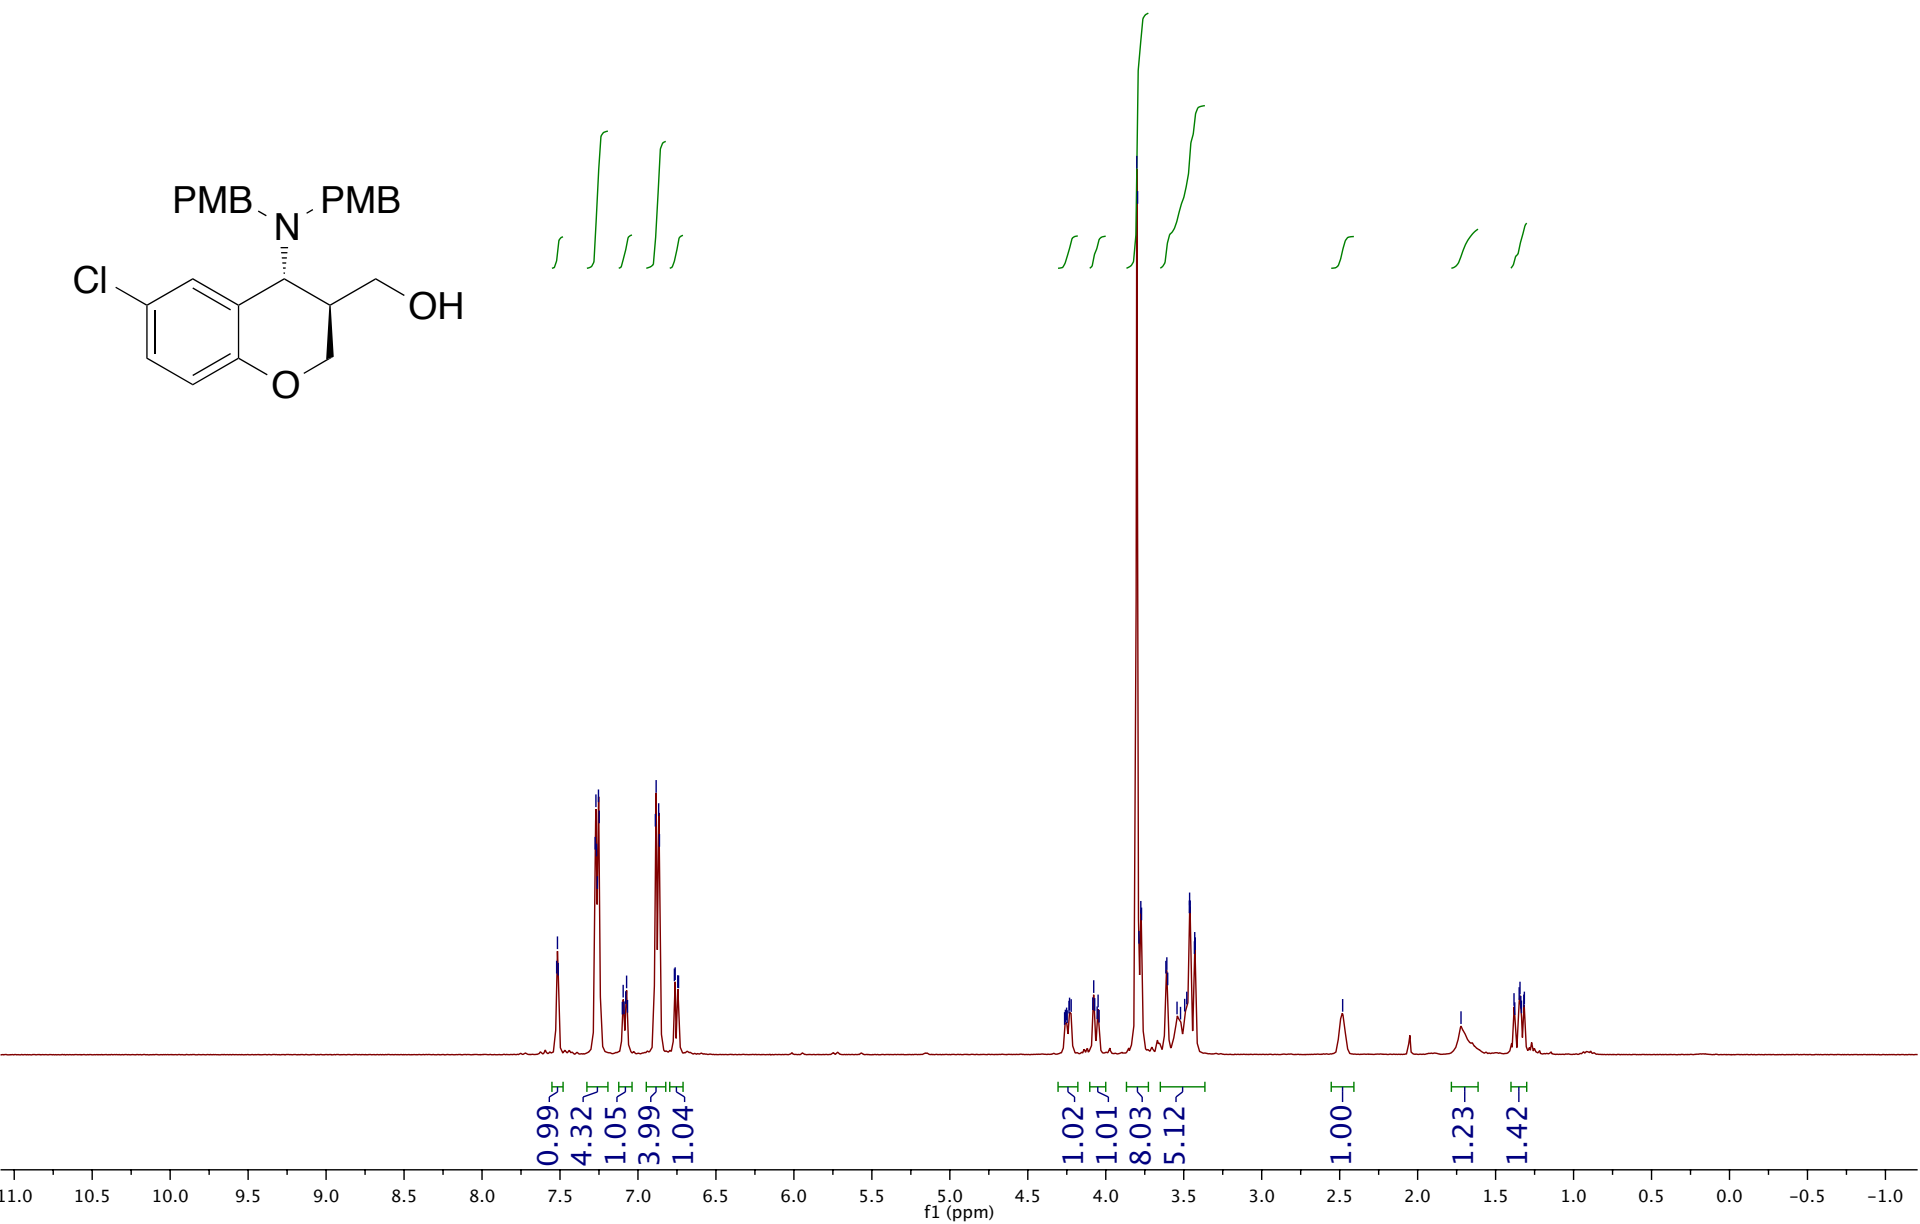

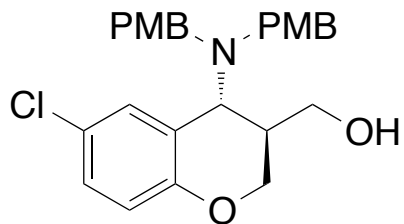

—158.89  
—154.78

131.50  
130.11  
129.66  
128.24  
125.87  
125.50  
118.39  
113.92

77.48 CDCl3  
77.16 CDCl3  
76.84 CDCl3

65.92  
62.52  
55.34  
53.46  
52.23

—36.04

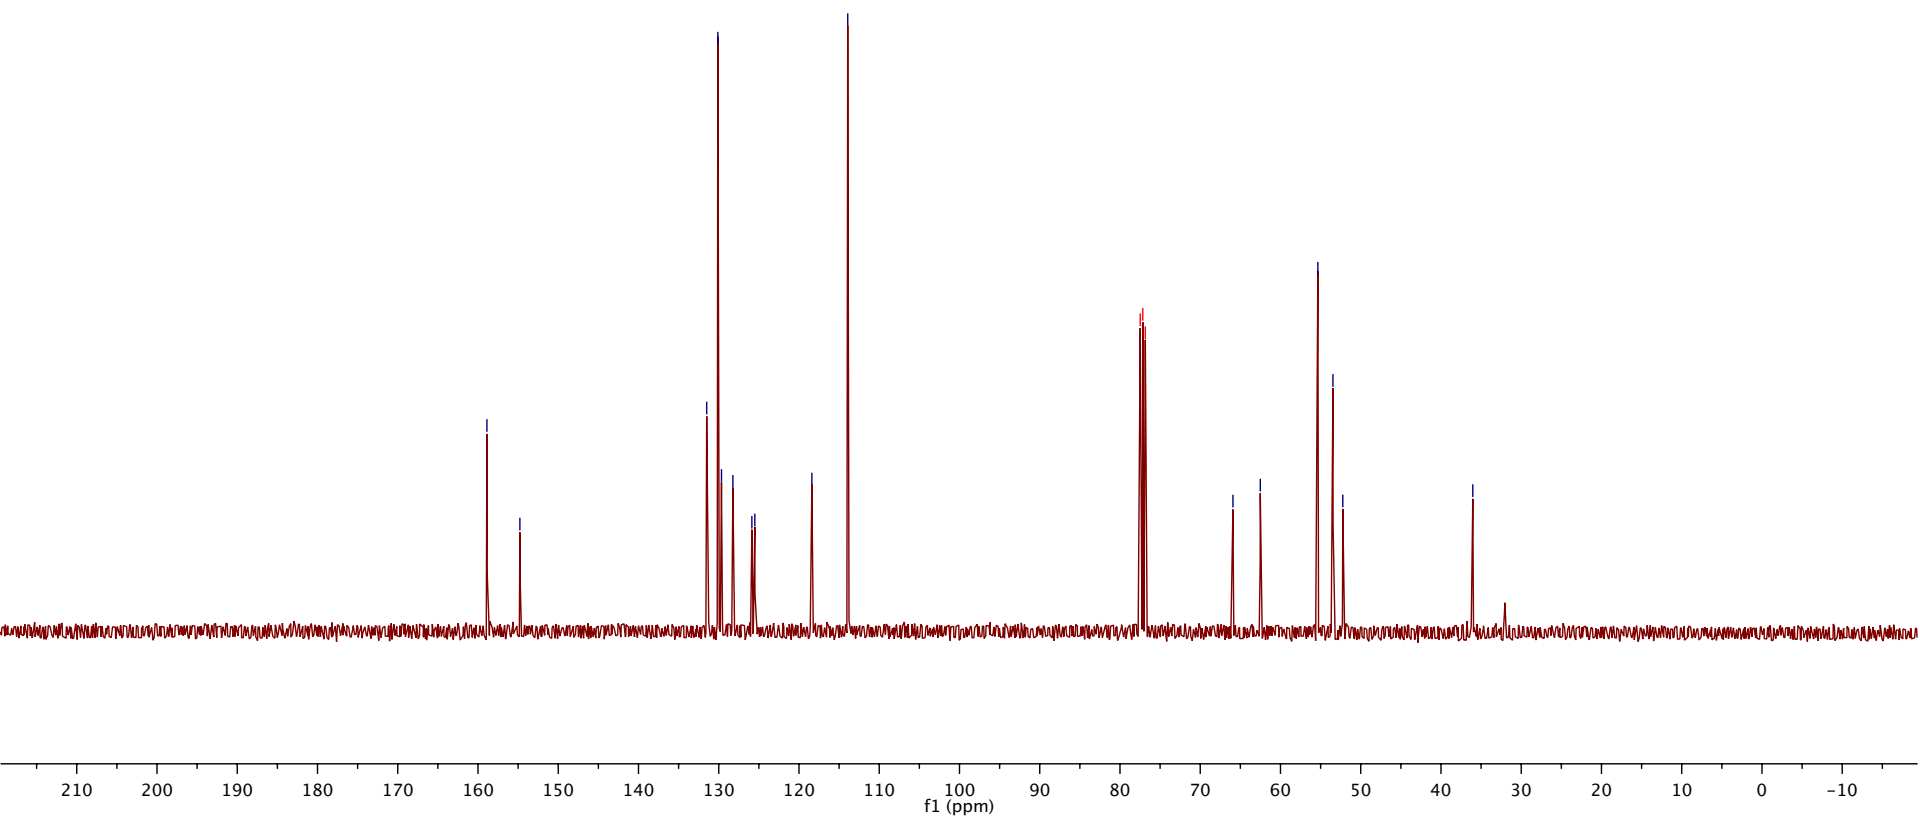

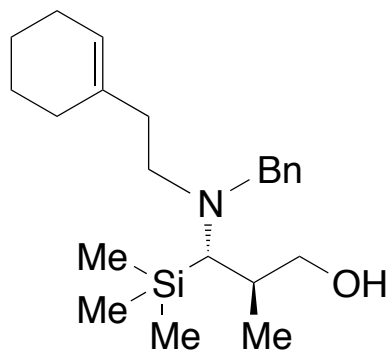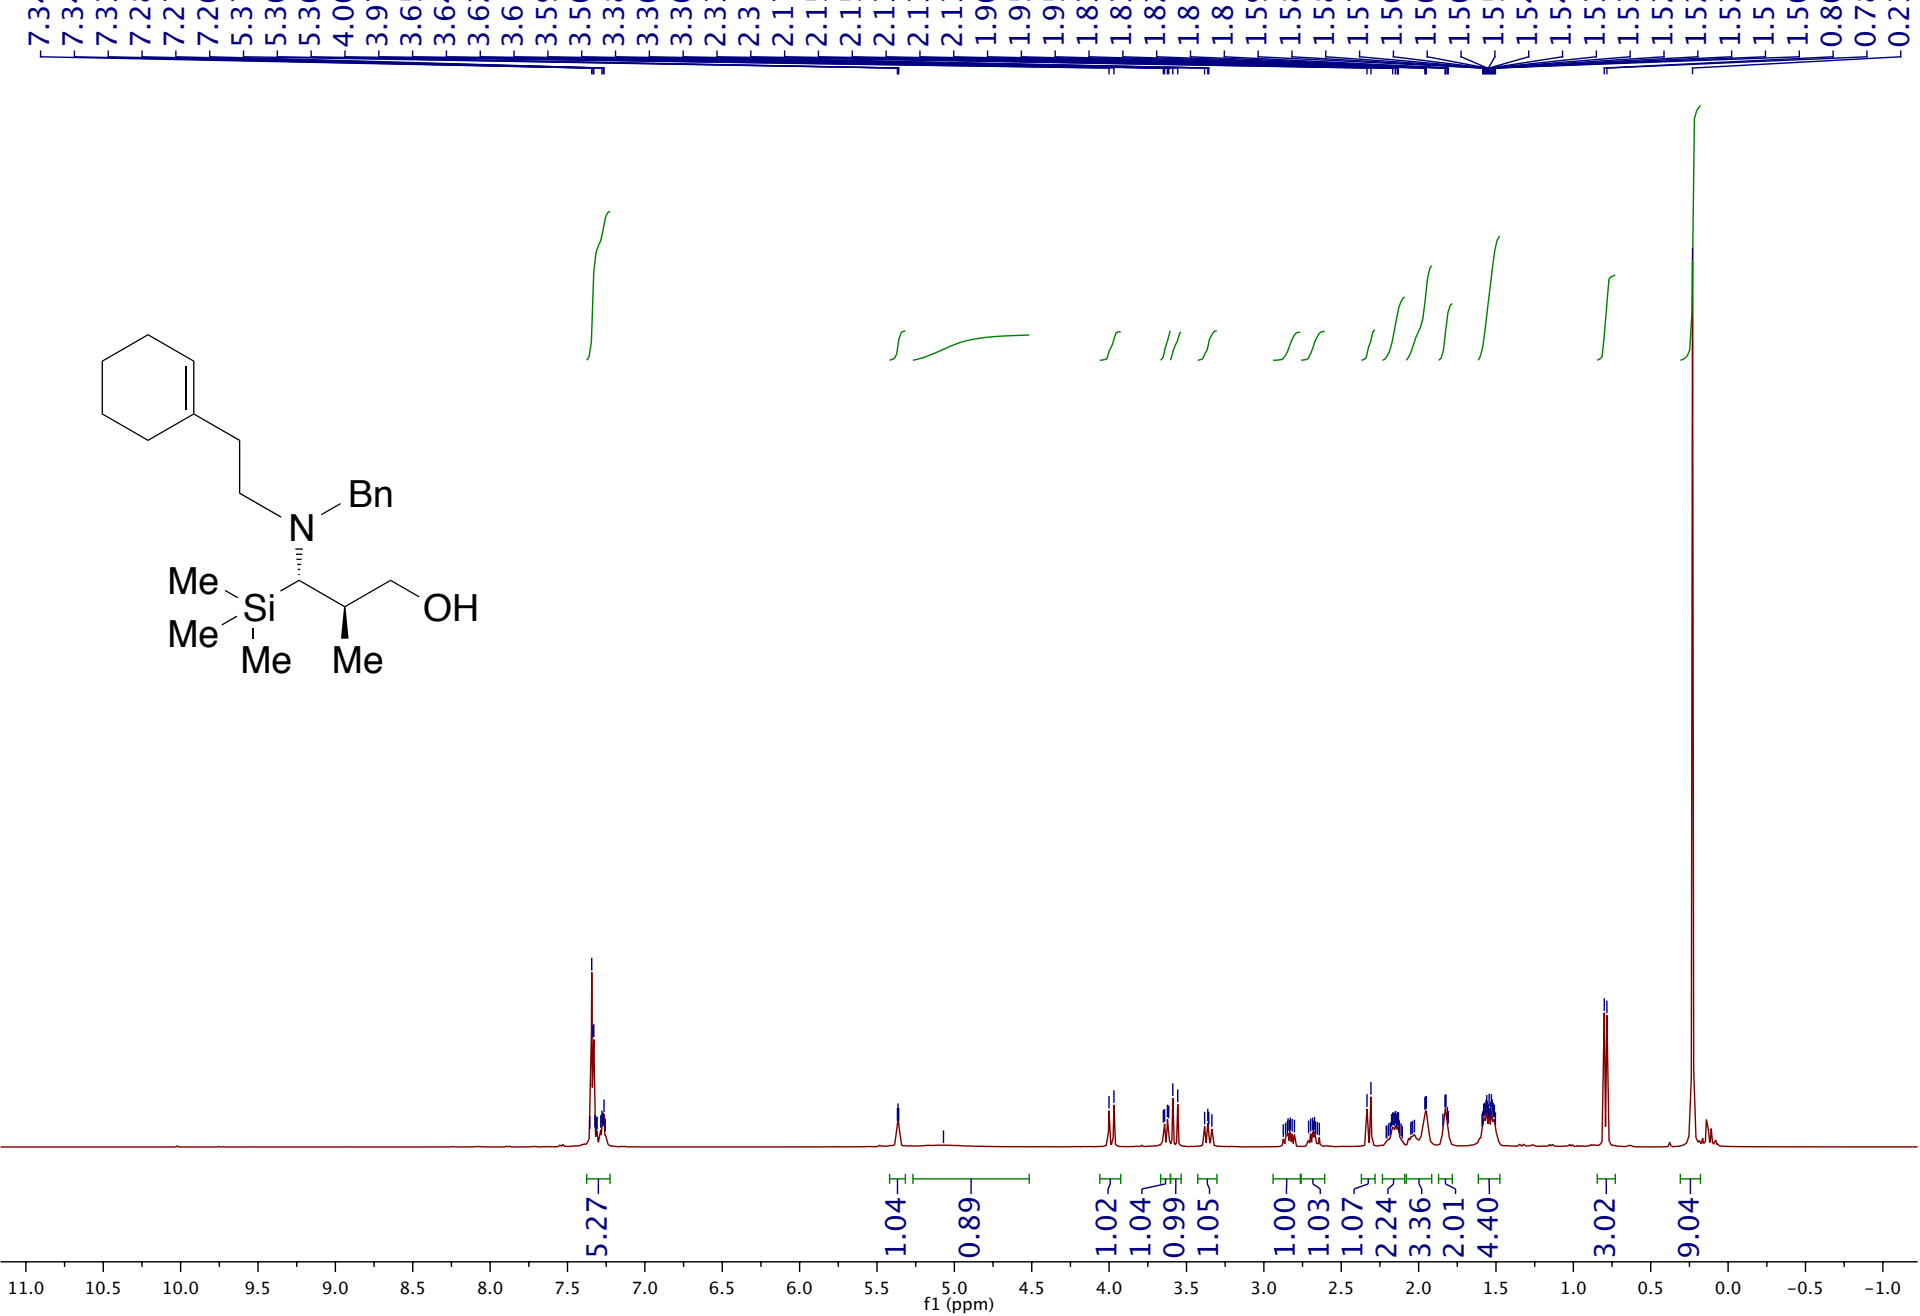

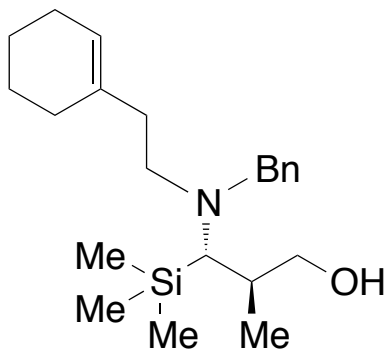

139.14  
 135.52  
 129.61  
 128.54  
 127.37  
 122.33

77.48 CDCl3  
 77.16 CDCl3  
 76.84 CDCl3  
 72.25

60.15  
 57.67  
 51.51

37.63  
 34.75  
 28.59  
 25.31  
 22.99  
 22.46  
 16.76

-2.27

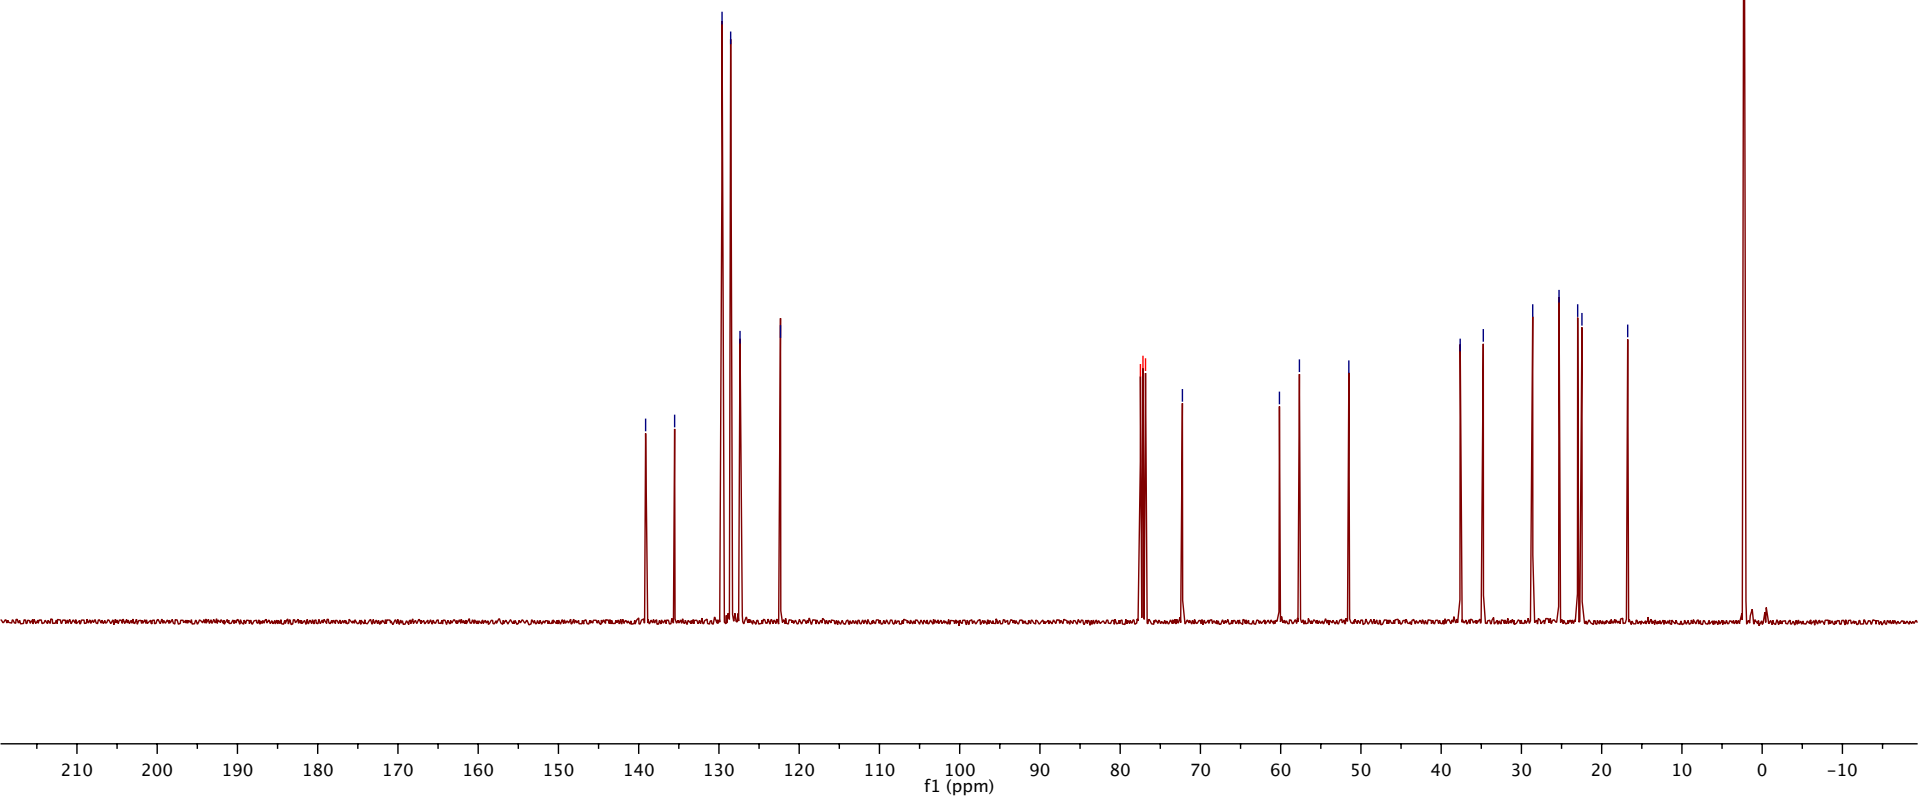

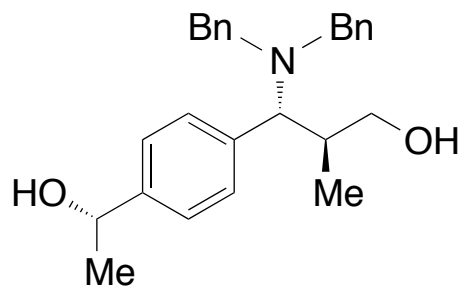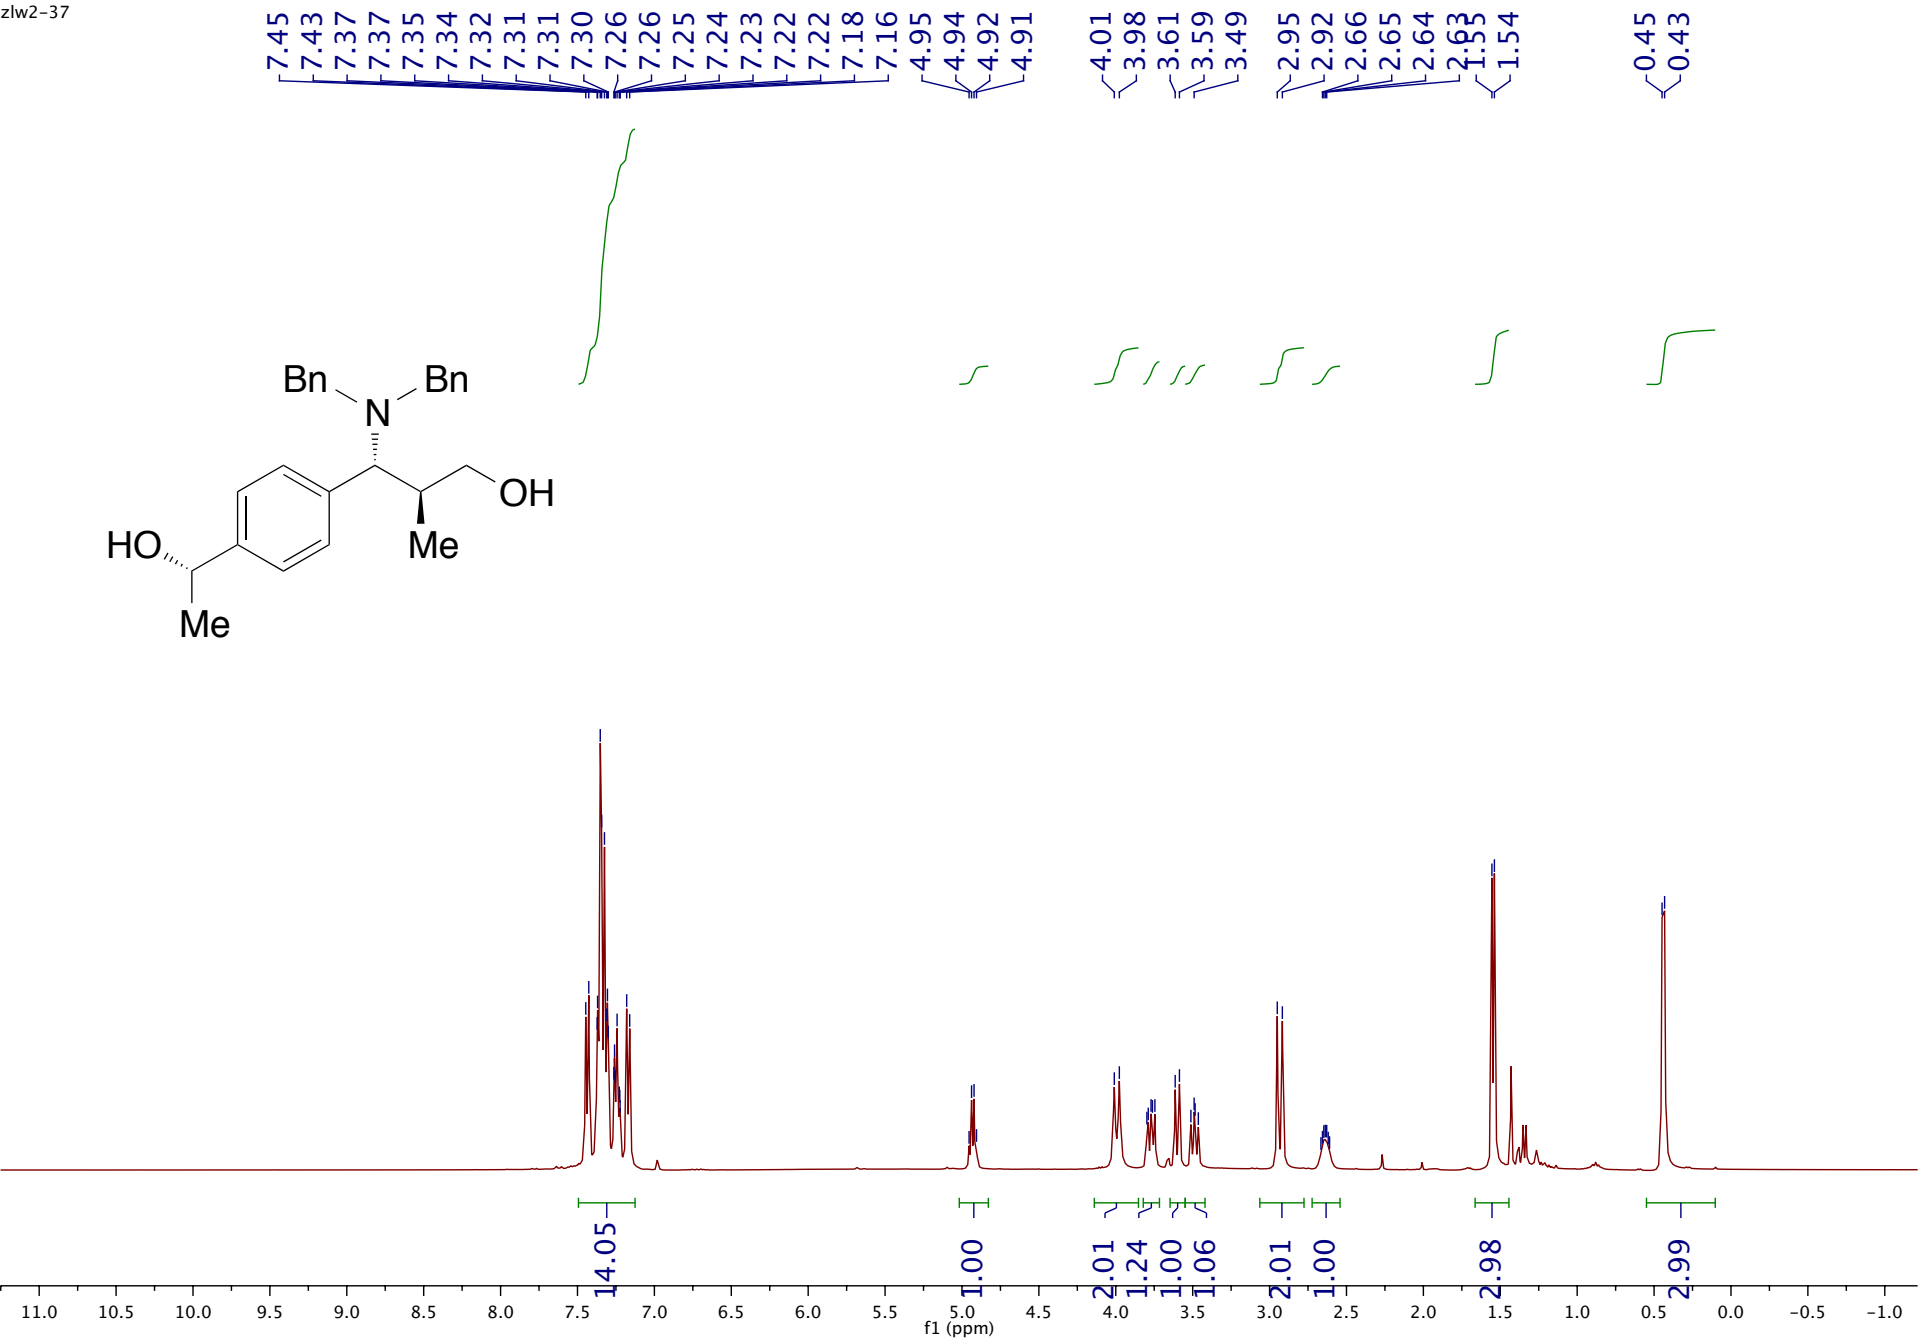

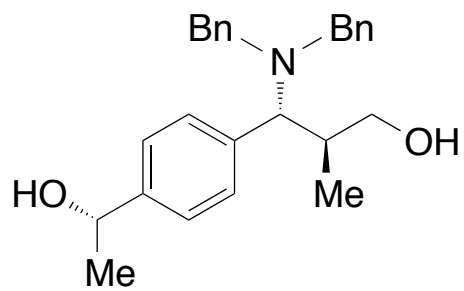

145.29  
138.42  
133.19  
130.11  
129.25  
128.68  
127.36  
125.18

77.48 CDCl<sub>3</sub>  
77.16 CDCl<sub>3</sub>  
76.84 CDCl<sub>3</sub>

69.82  
69.82  
69.59  
68.99

54.10

33.86

25.31

15.38

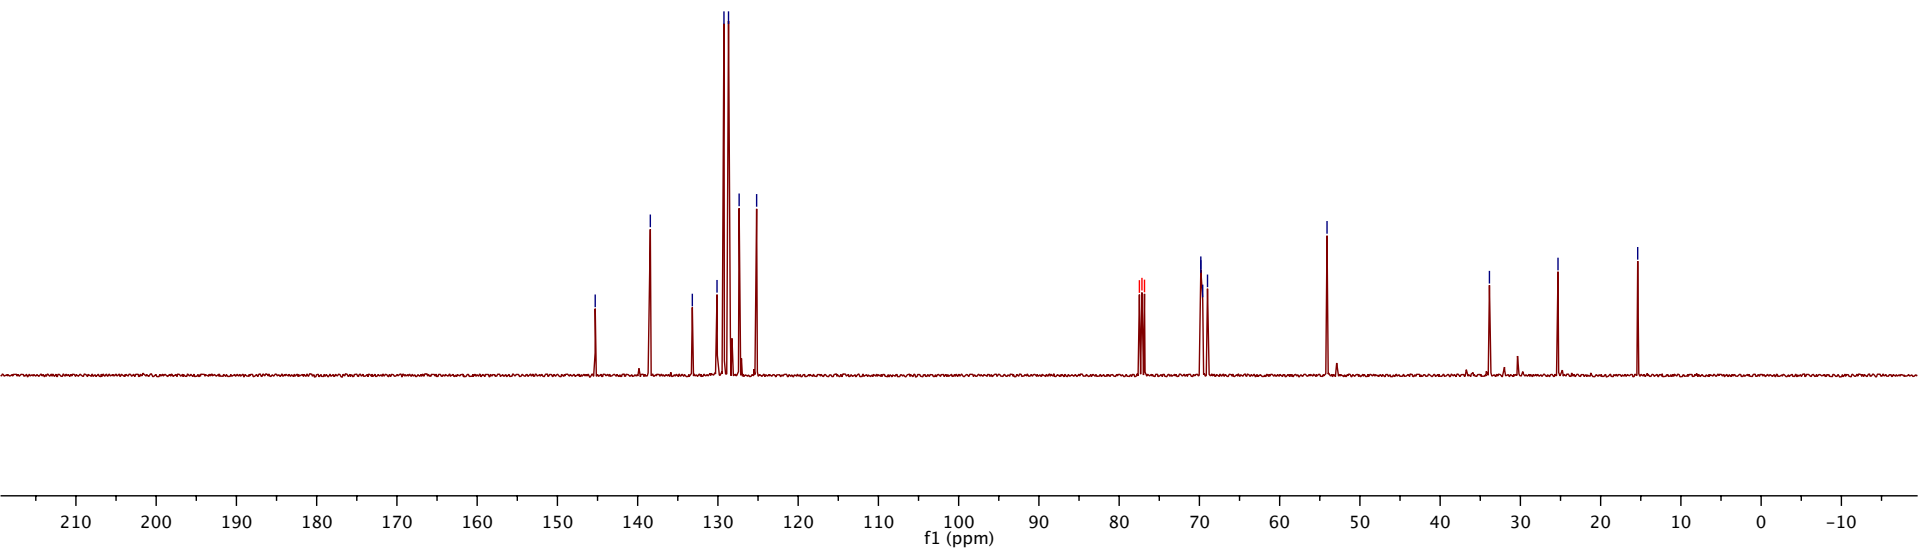

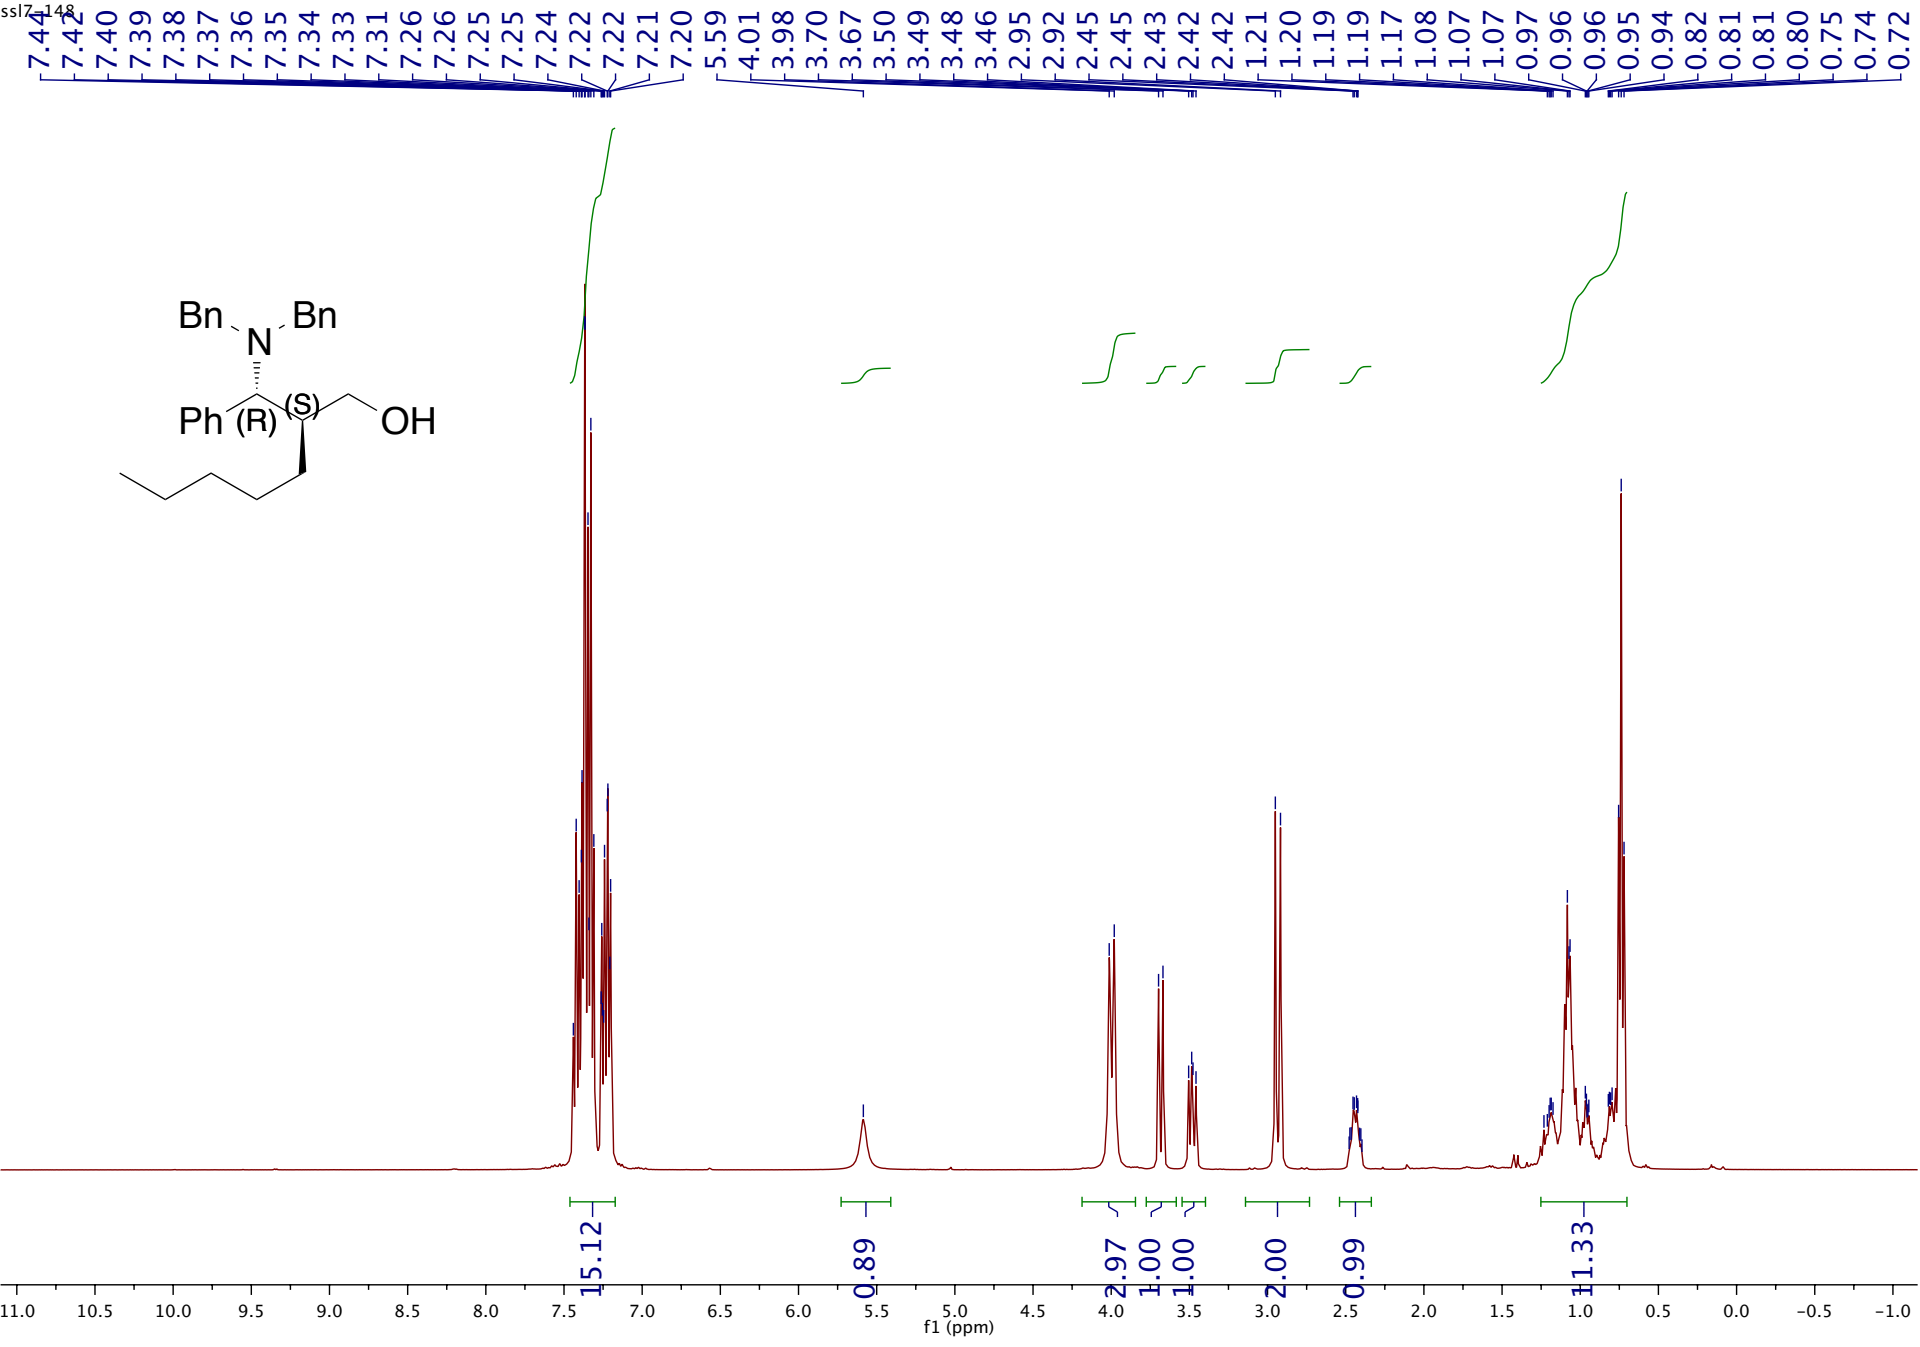



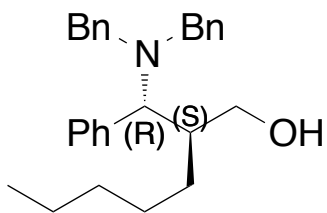

138.59  
134.27  
130.22  
129.32  
128.74  
128.08  
127.61  
127.42

77.48 CDCI3  
77.16 CDCI3  
76.84 CDCI3  
68.03  
66.57

54.24

39.07  
31.87  
28.95  
26.75  
22.43  
13.99

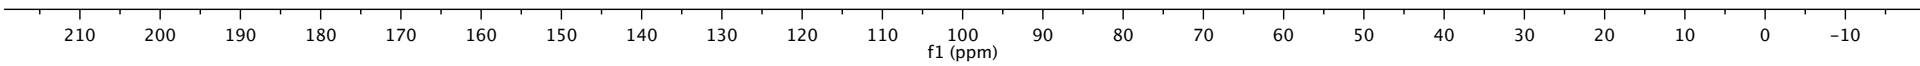

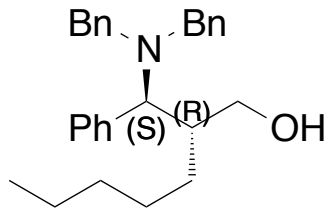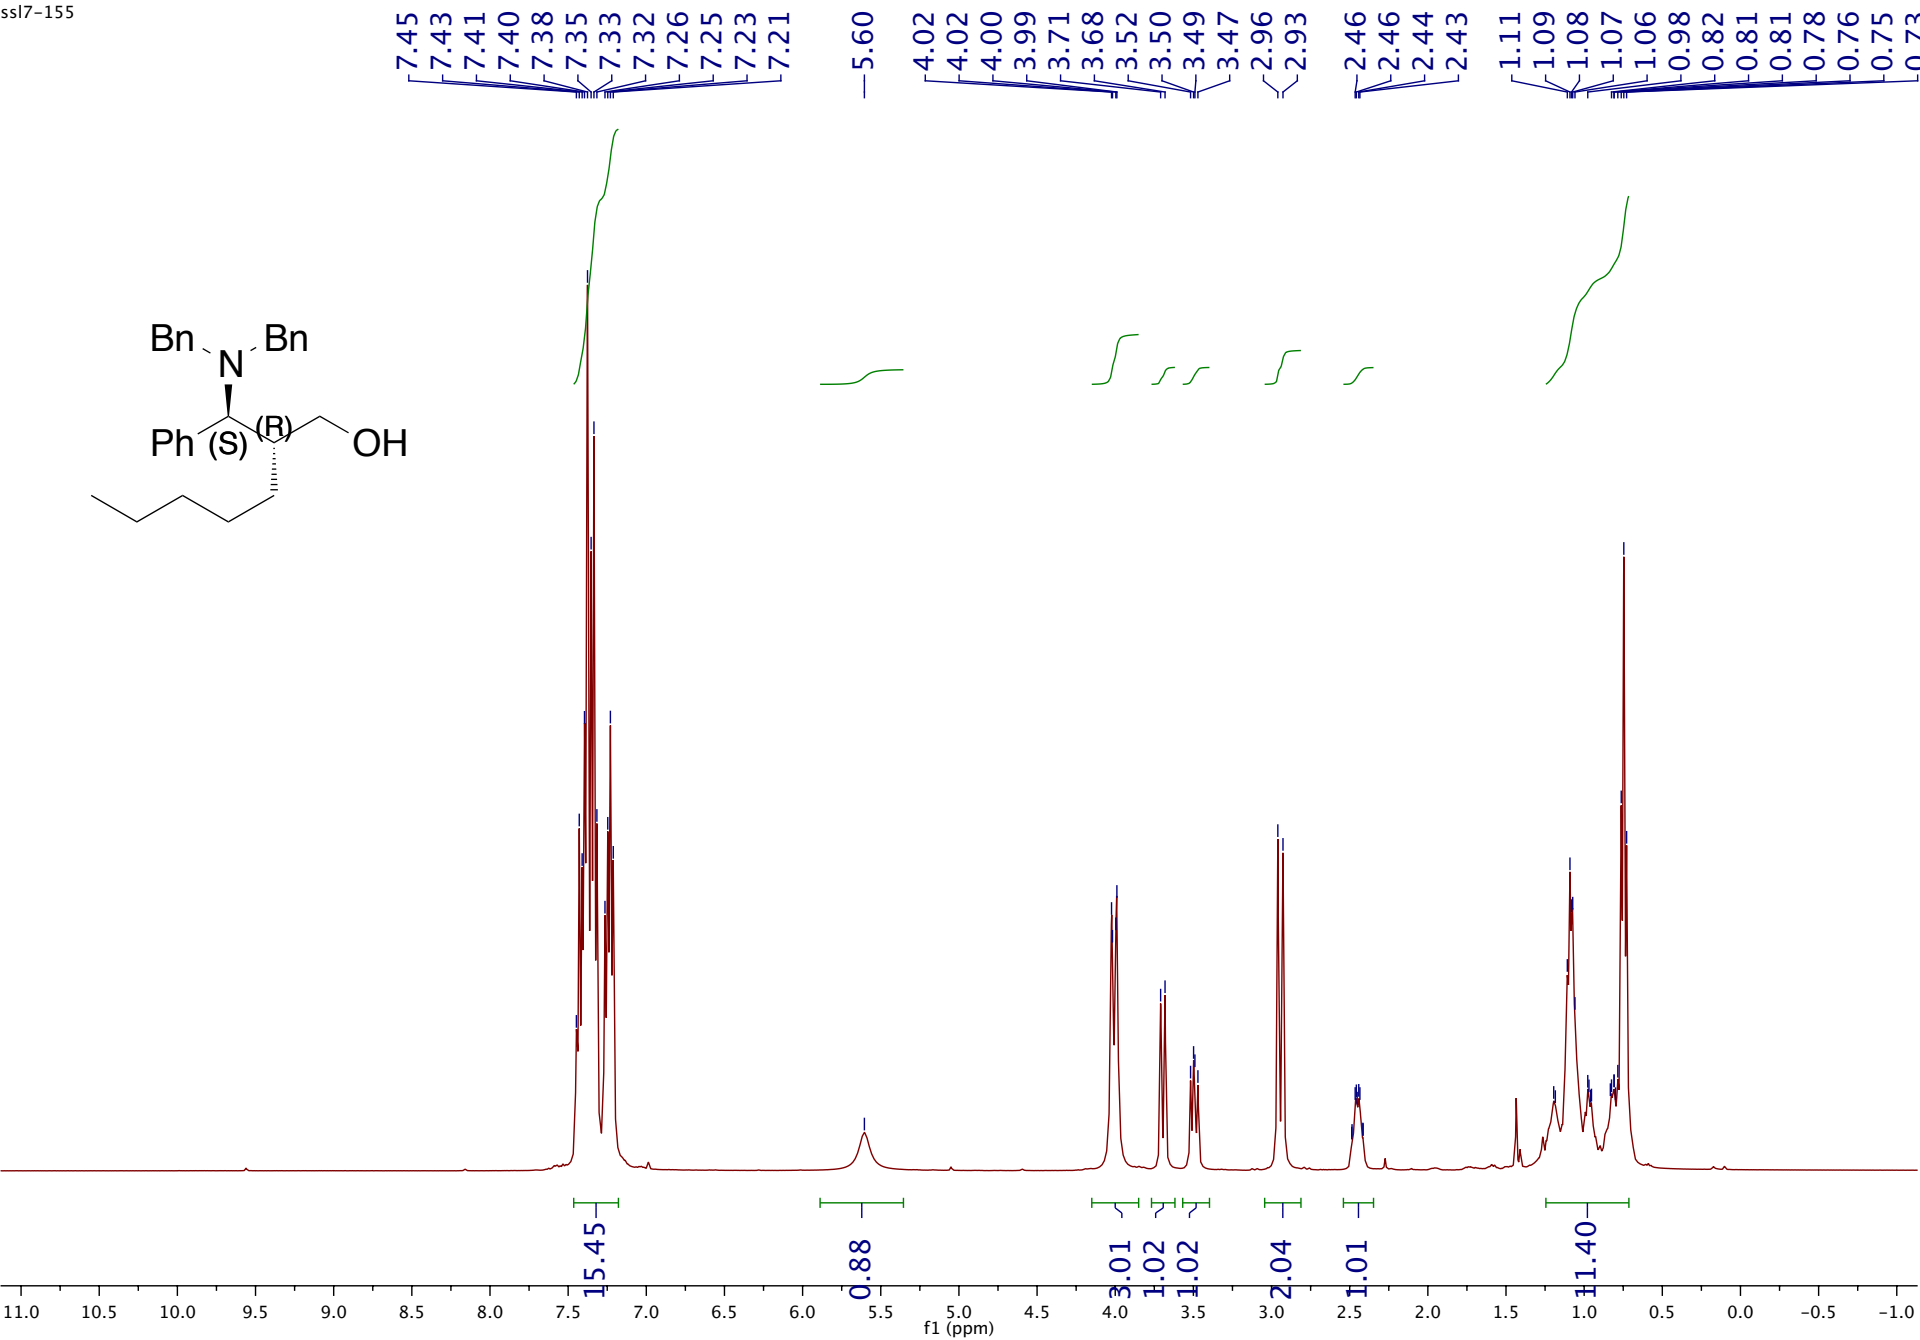

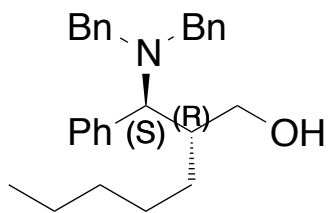

138.57  
134.25  
130.20  
129.31  
128.72  
128.07  
127.60  
127.40

77.48 CDCl3  
77.16 CDCl3  
76.84 CDCl3  
68.01  
66.55

54.23

39.06  
31.85  
28.94  
26.73  
22.42  
13.98

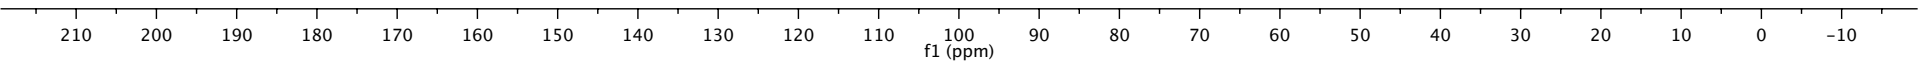

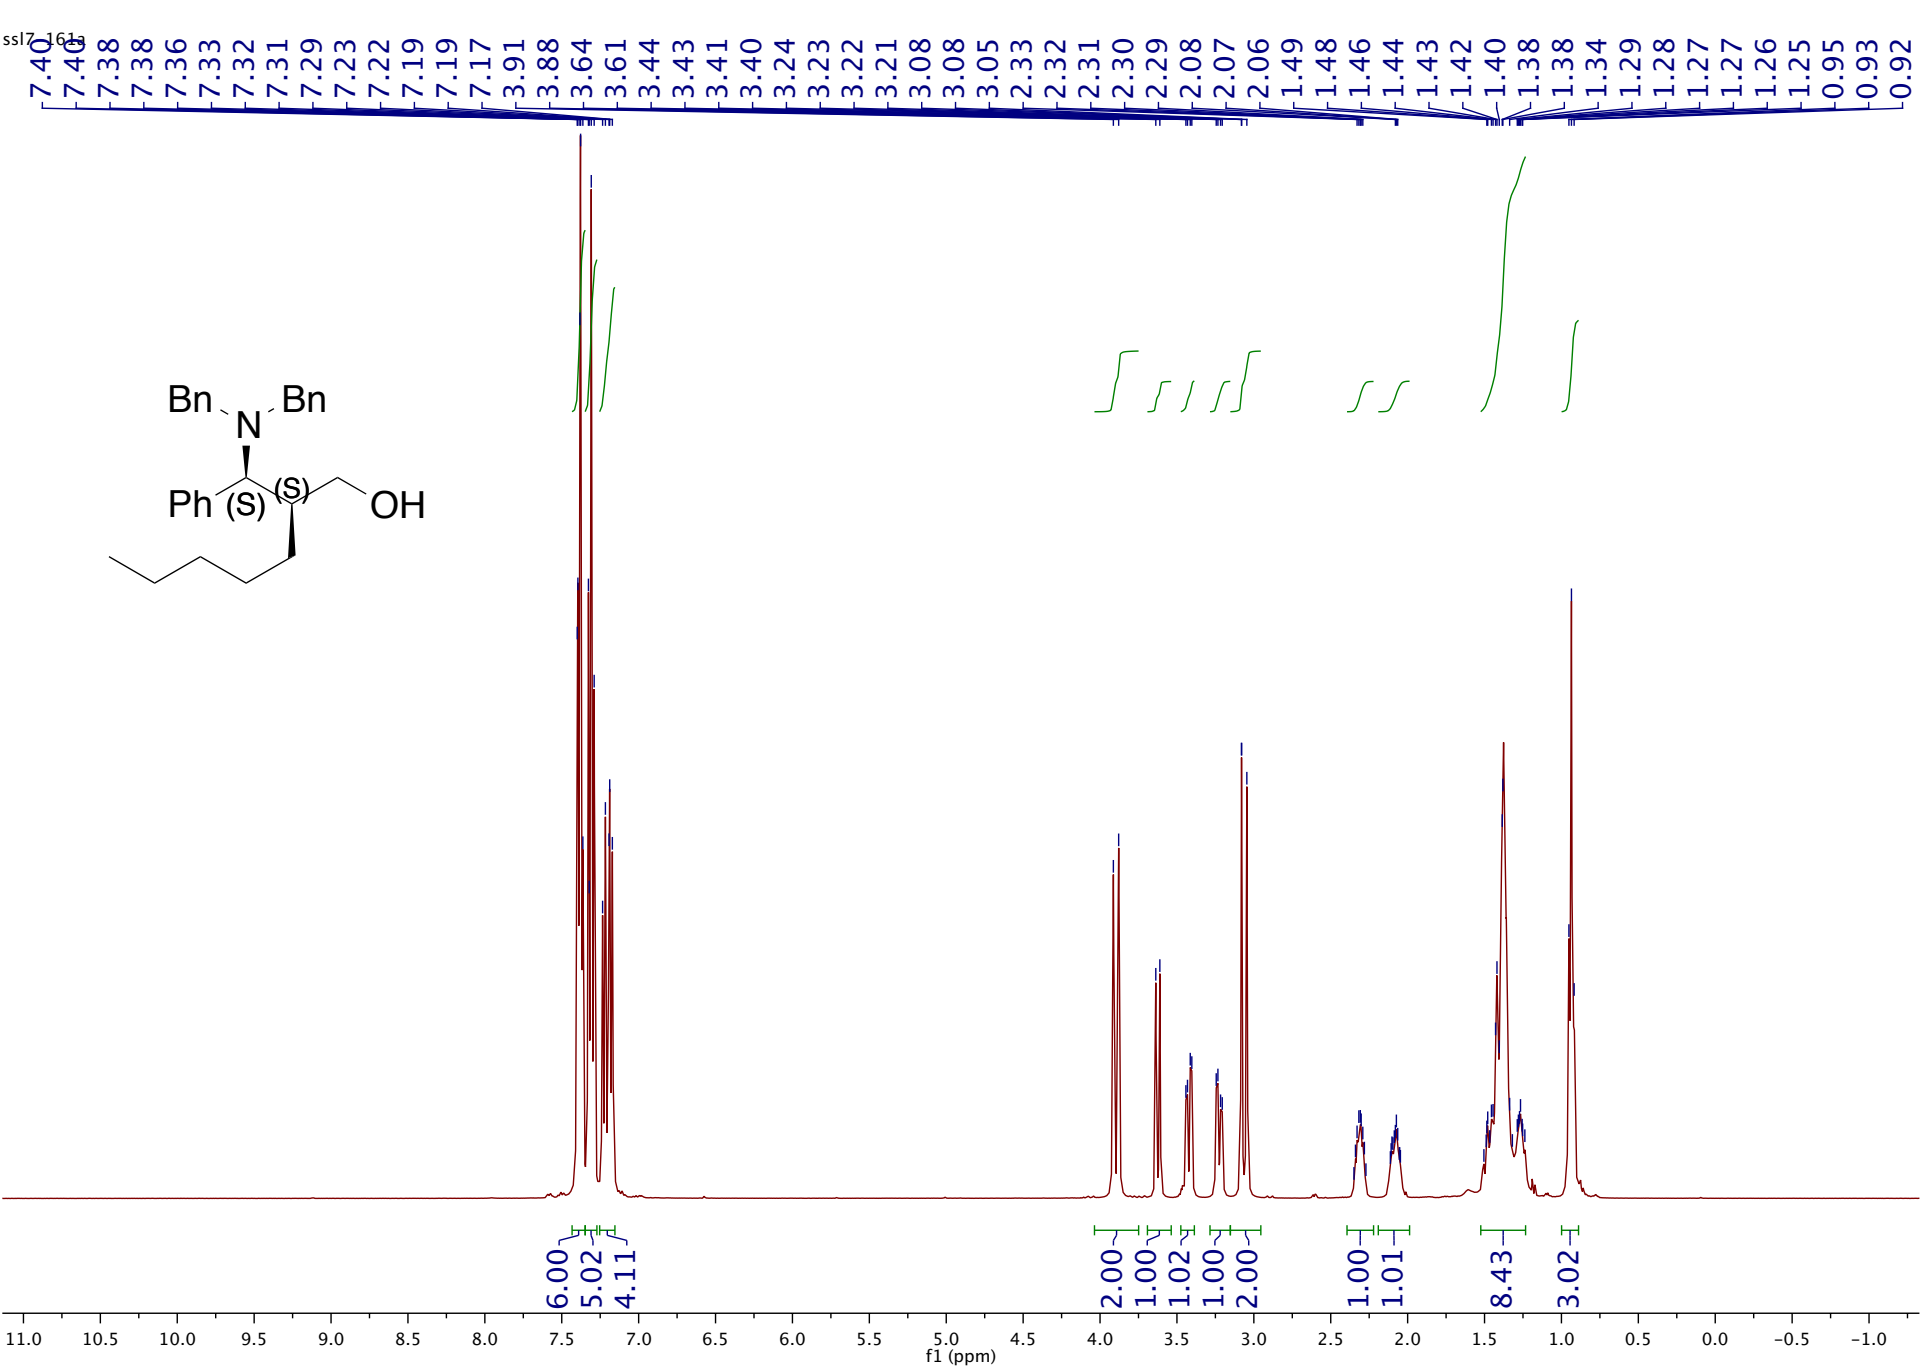

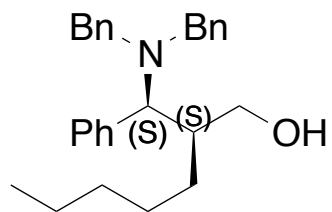

139.80  
136.43  
129.71  
128.97  
128.38  
128.19  
127.40  
126.96

77.48 CDC13  
77.16 CDC13  
76.84 CDC13

64.11  
62.82

53.78

40.78

32.68

27.56

26.49

22.93

14.33

210 200 190 180 170 160 150 140 130 120 110 100 90 80 70 60 50 40 30 20 10 0 -10

f1 (ppm)

ssl7-1255

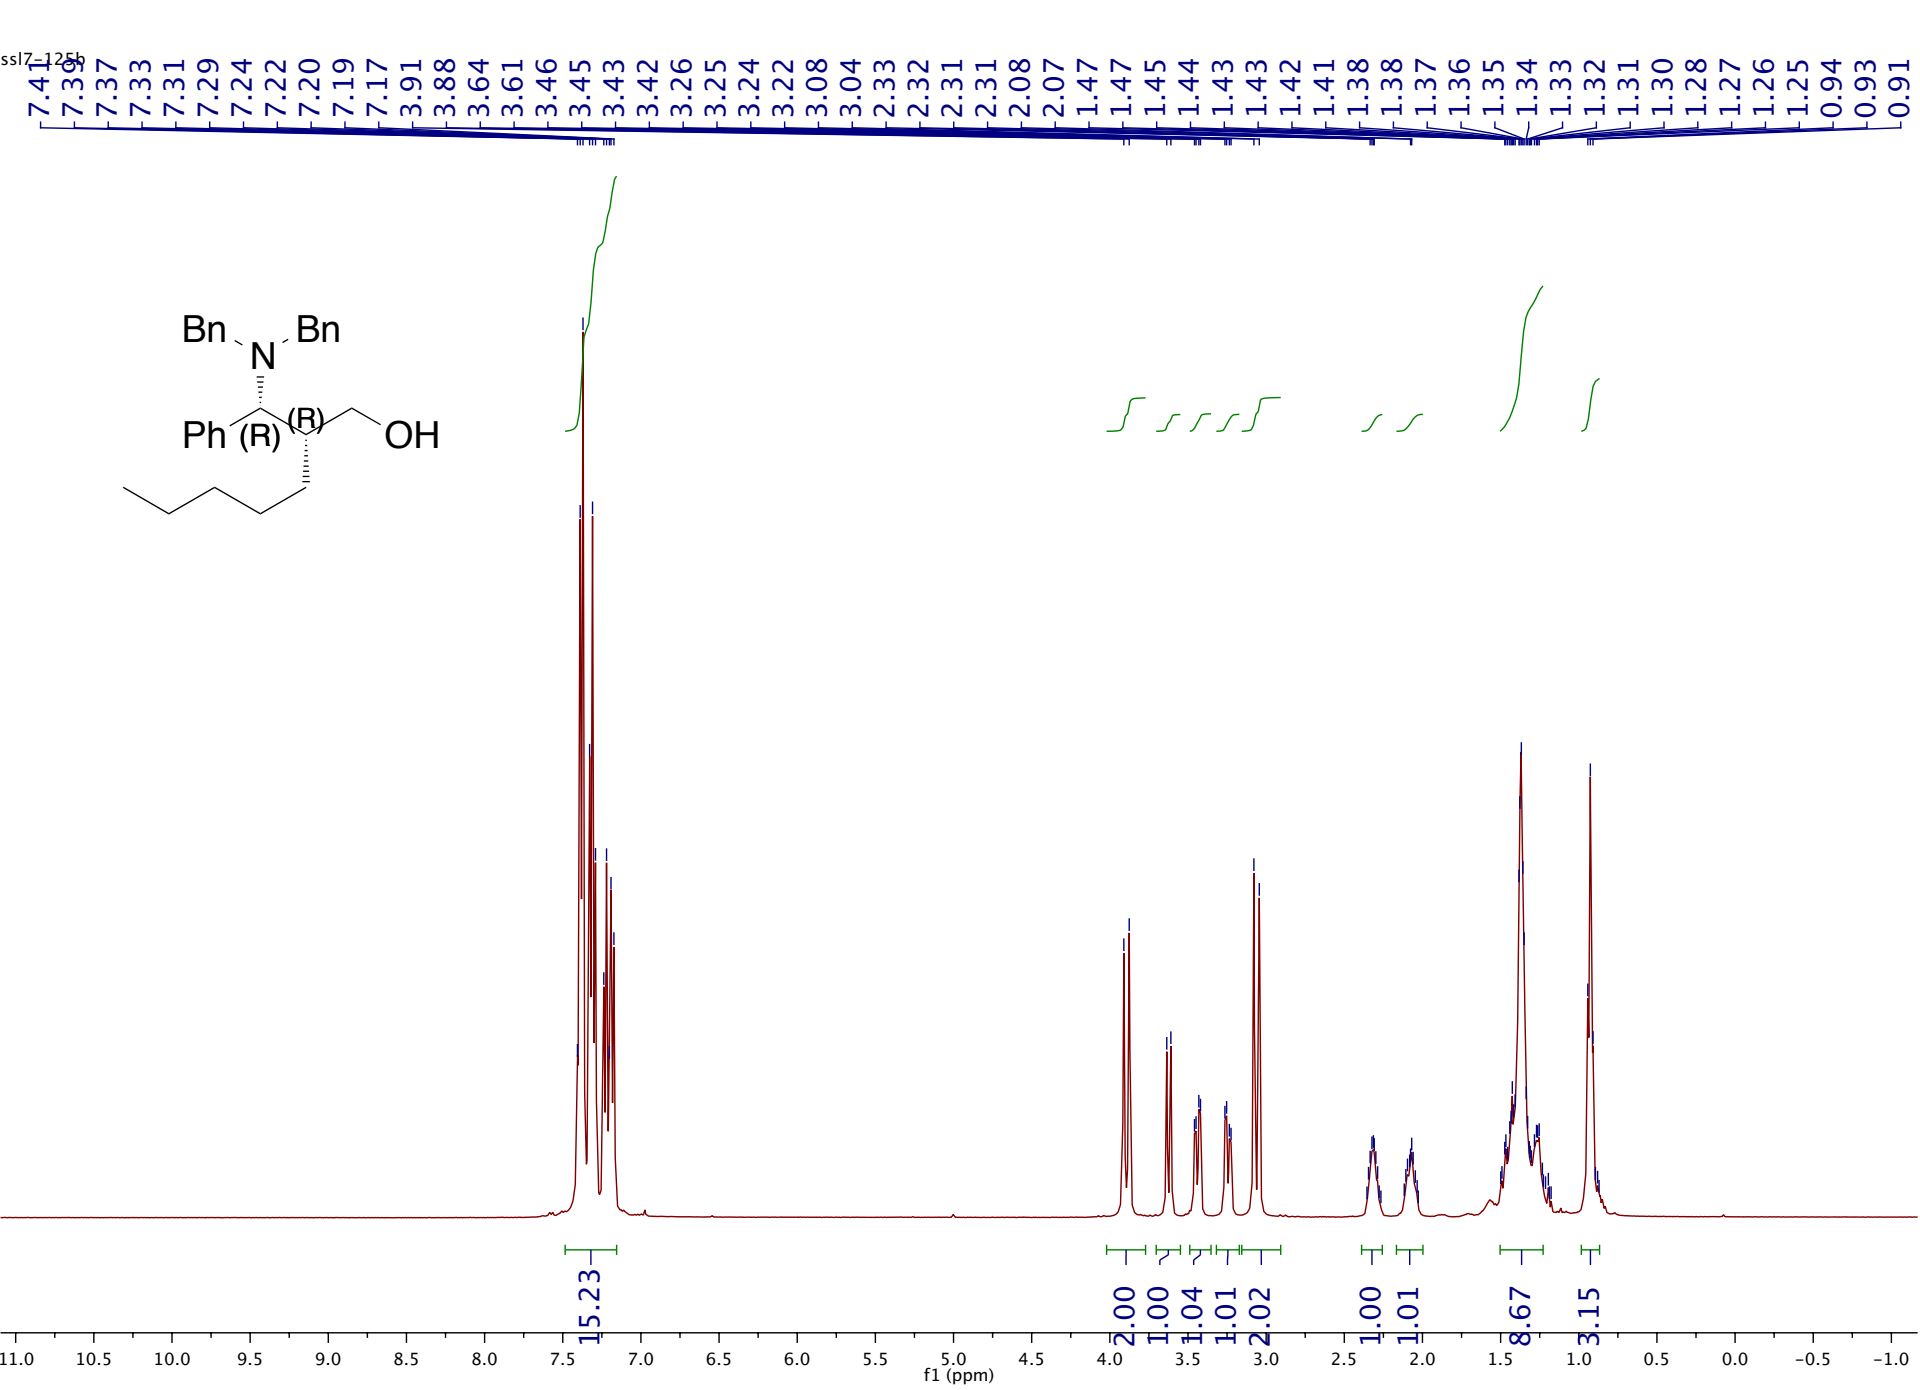

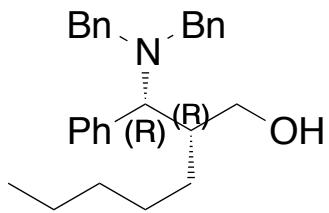

139.81  
136.45  
129.74  
129.00  
128.41  
128.24  
127.44  
126.99

77.48 CDCl3  
77.16 CDCl3  
76.84 CDCl3

64.21  
62.92

53.81

40.82

32.70

27.62

26.55

22.95

14.35

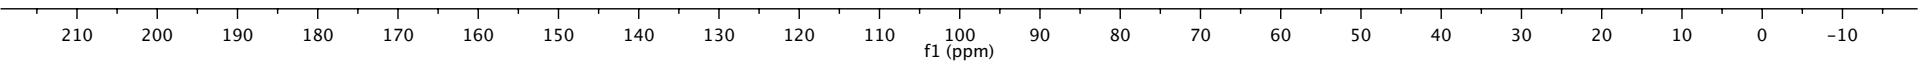

Reaction using Rac-L1 as ligand

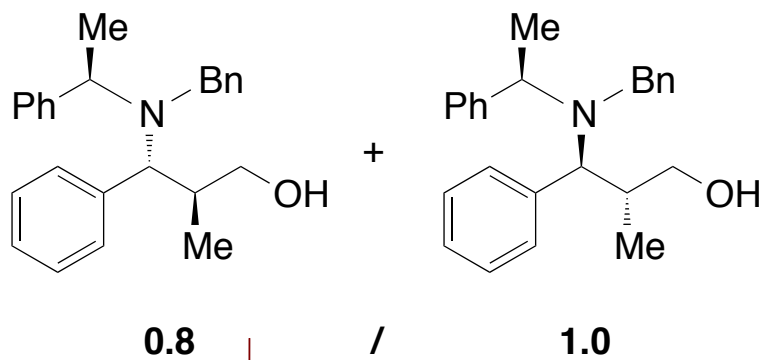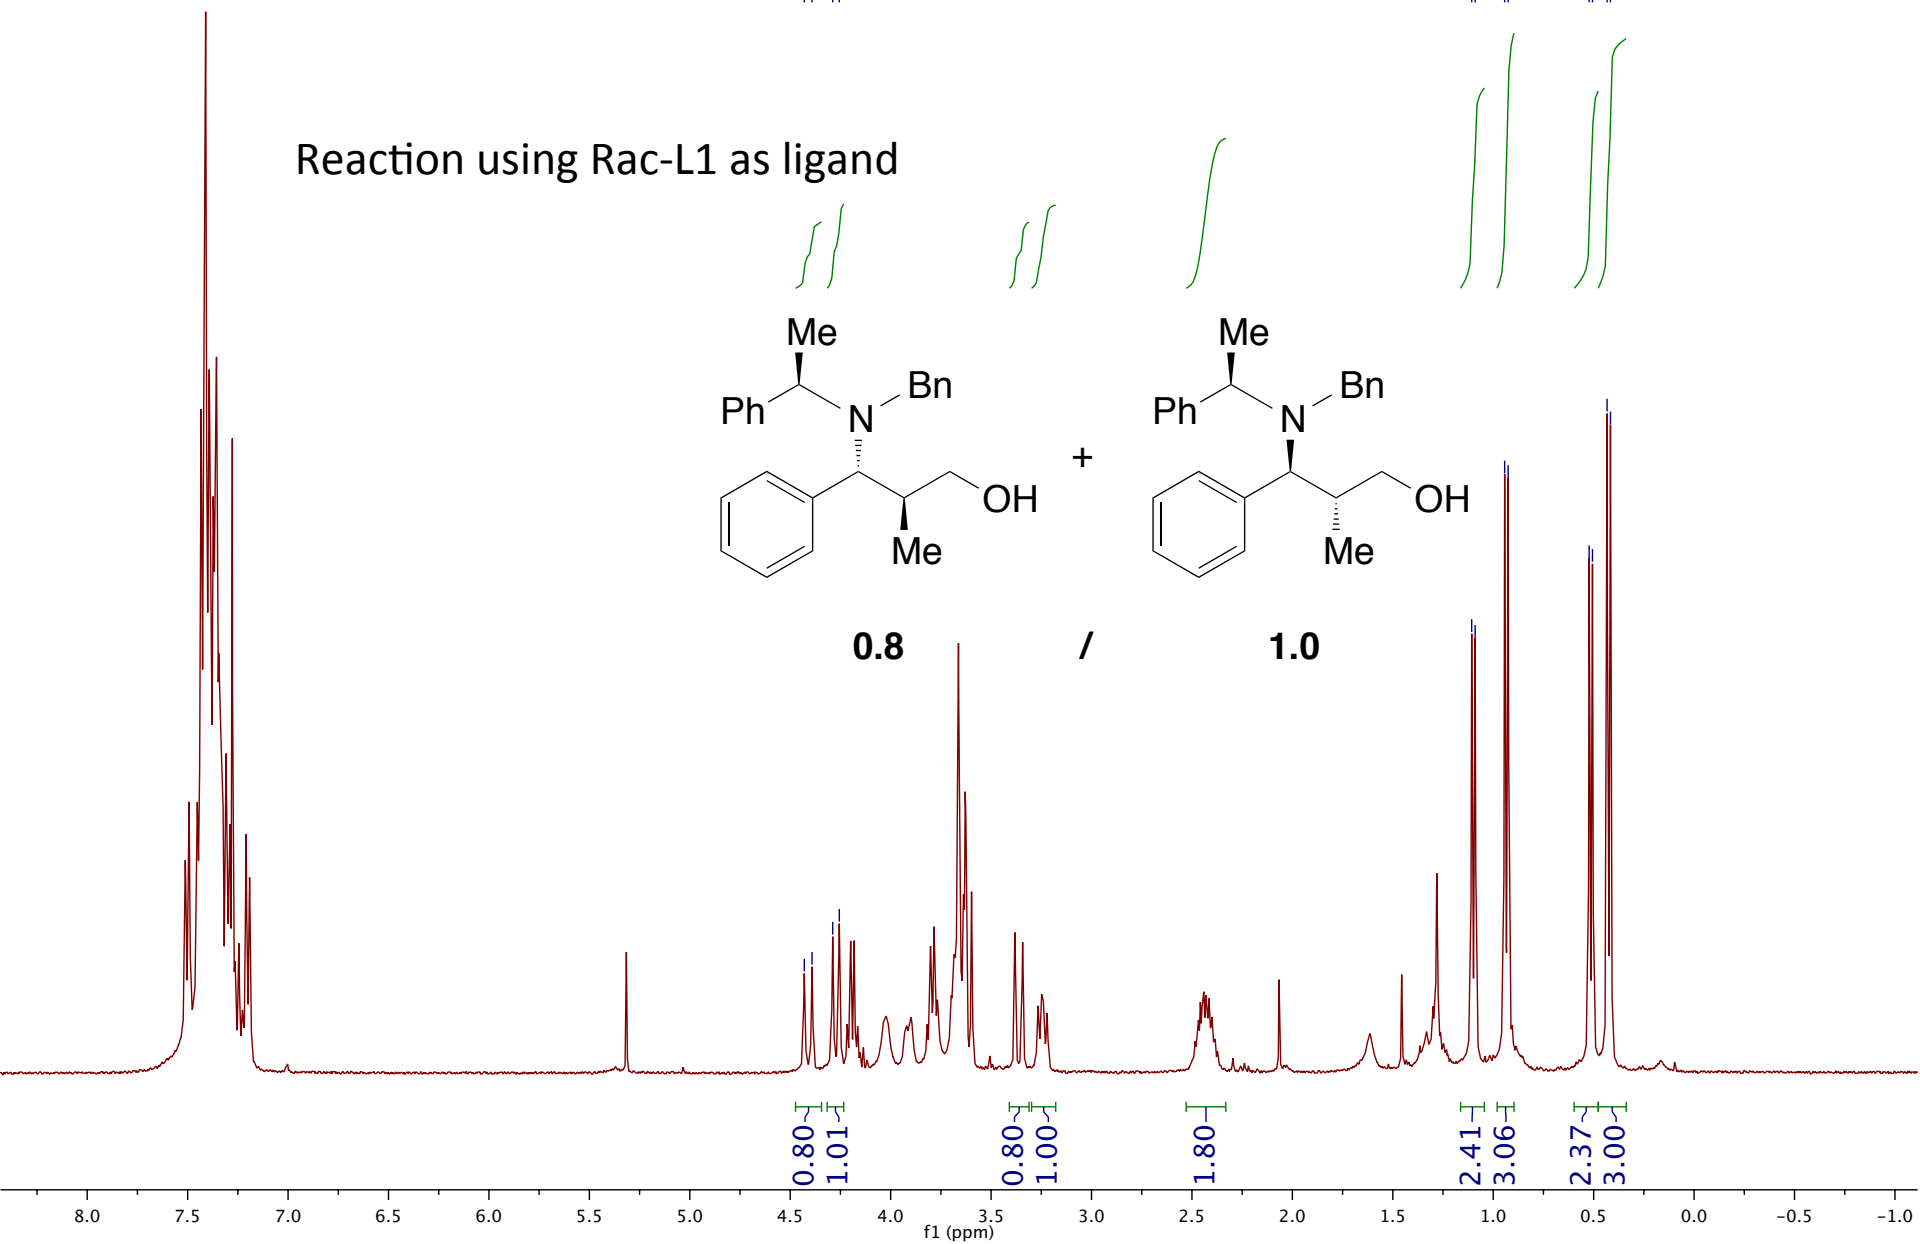



ssl7\_65\_H17

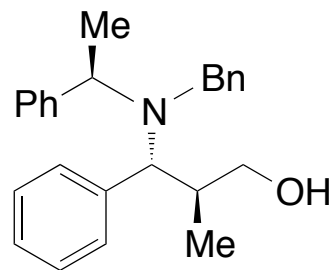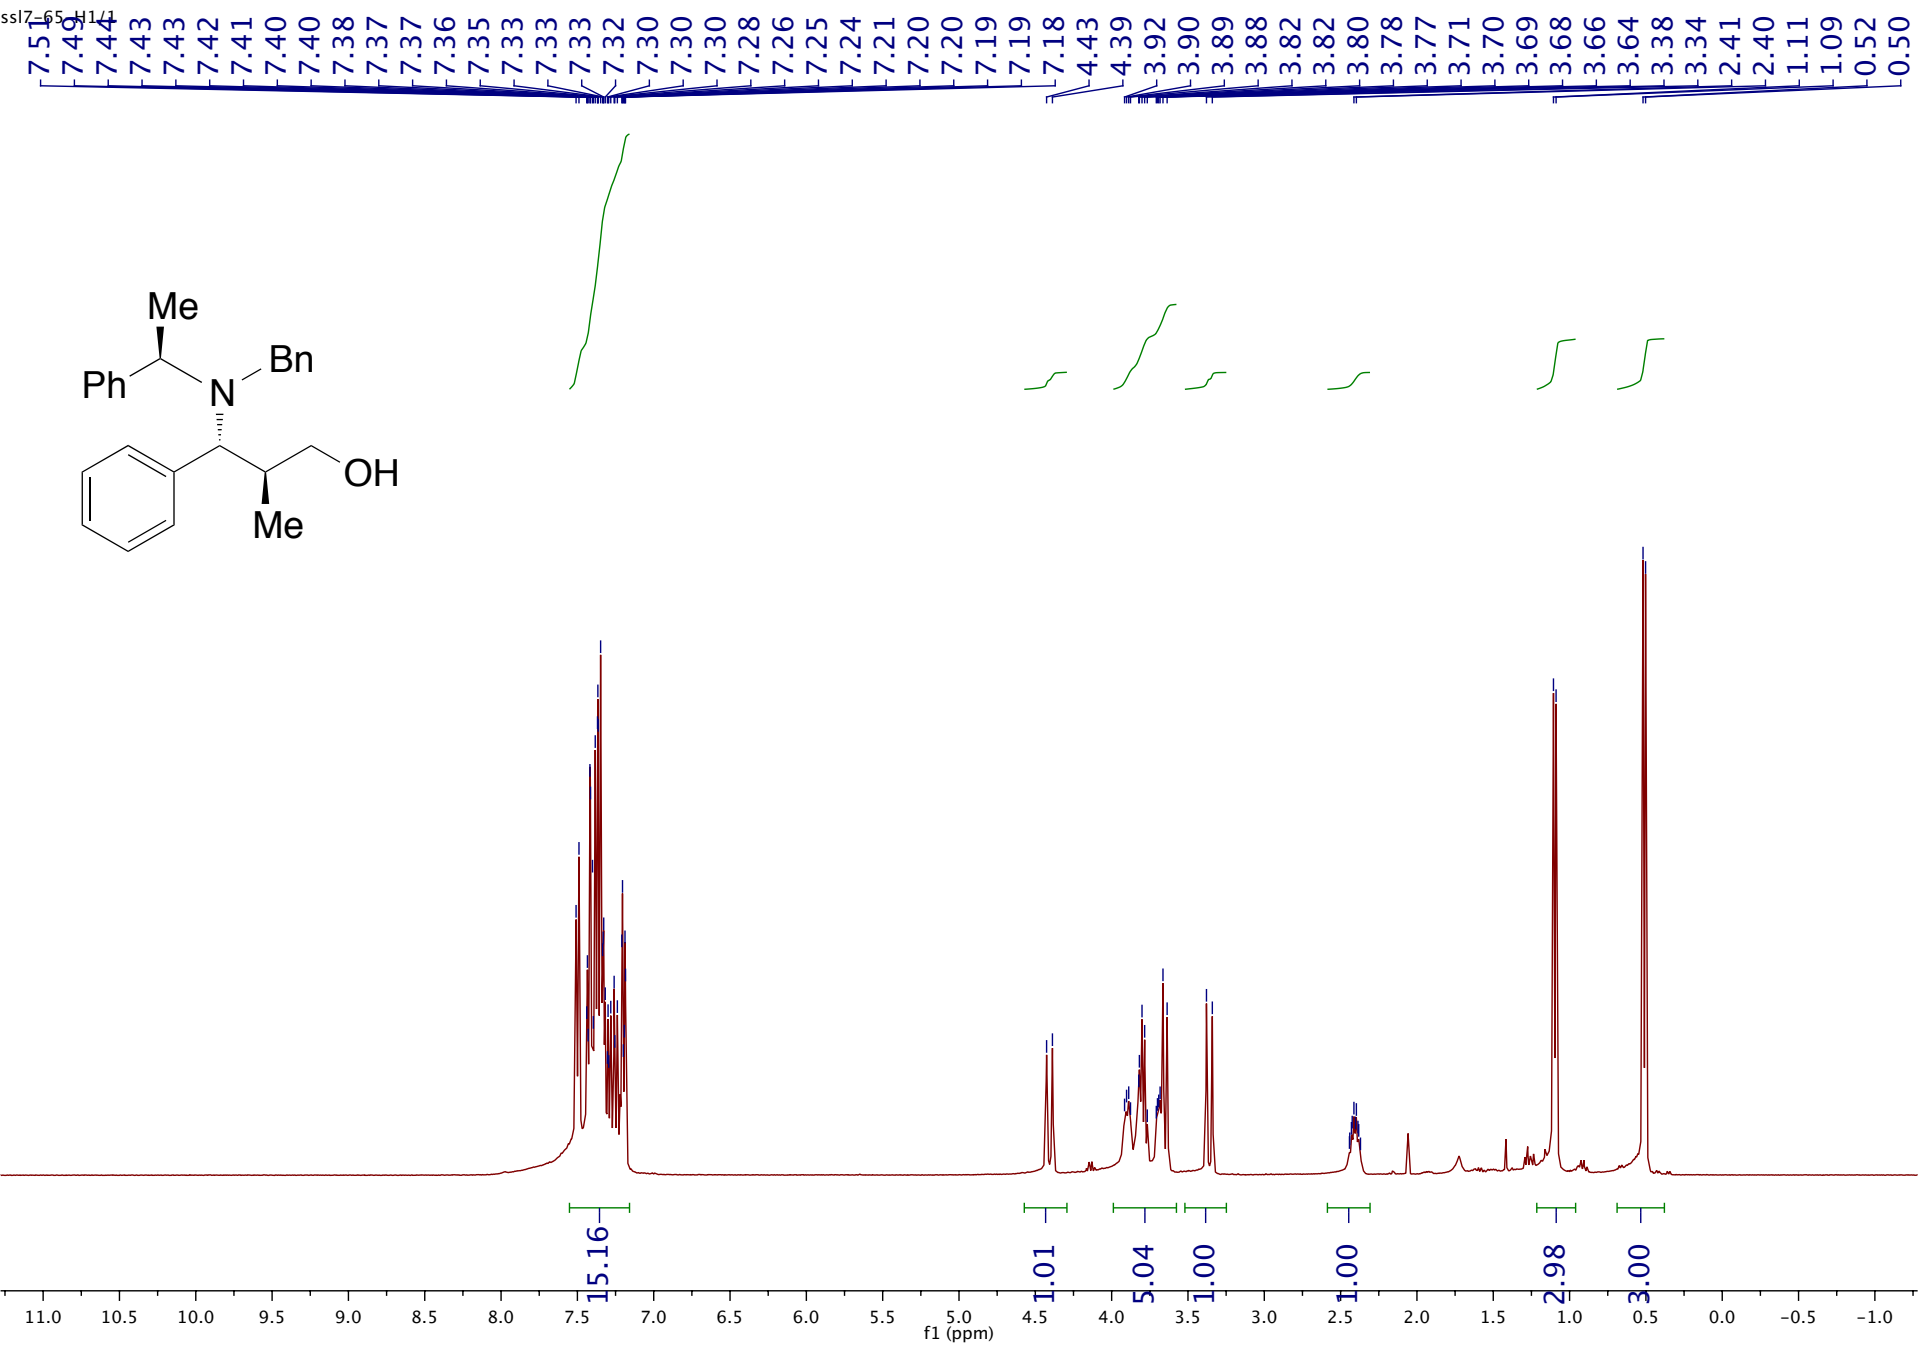

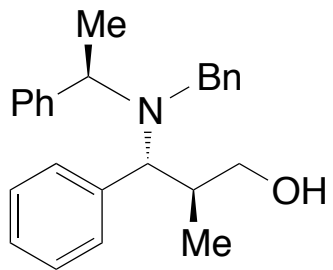

- 146.05
- 142.40
- 136.73
- 130.11
- 128.86
- 128.51
- 127.99
- 127.86
- 127.62
- 127.35
- 127.18
- 126.63
- 77.48 CDCl3
- 77.16 CDCl3
- 76.84 CDCl3
- 68.99
- 67.83
- 62.45
- 52.91
- 36.15
- 24.03
- 15.61

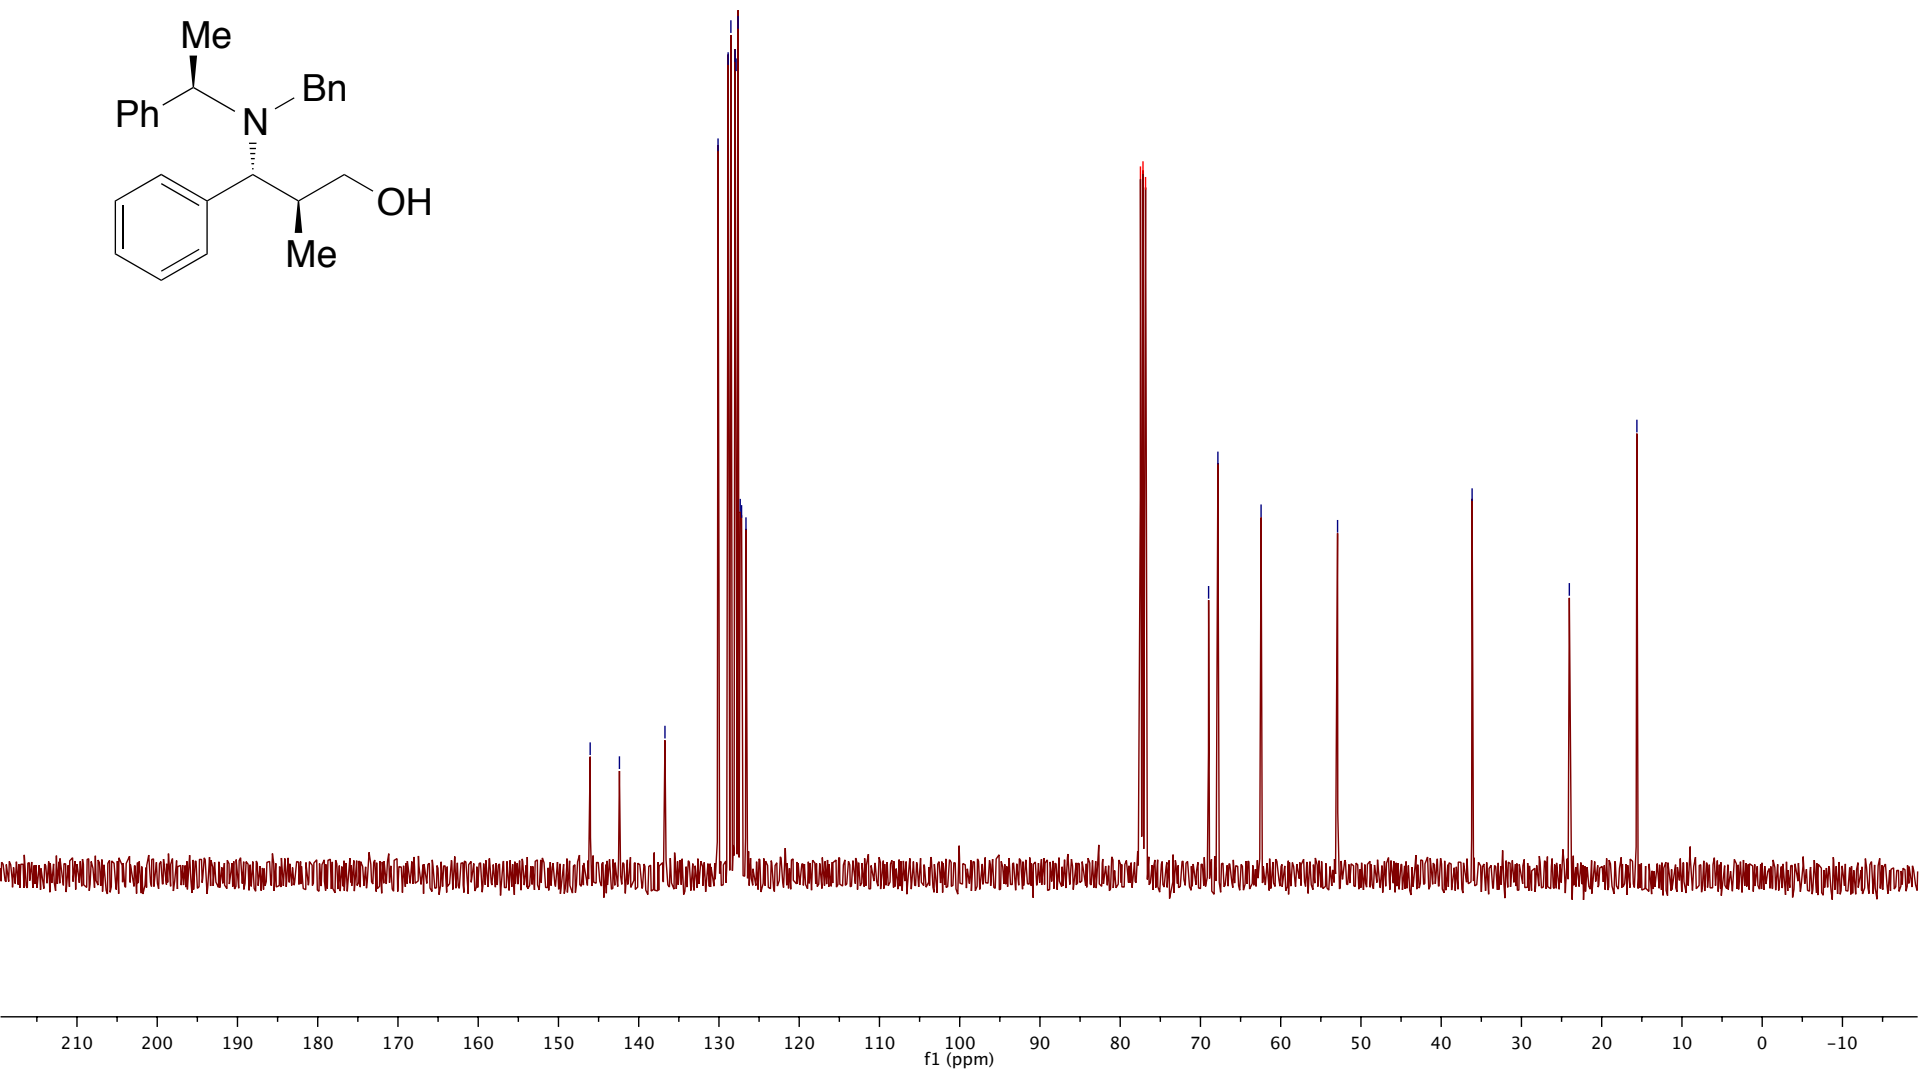

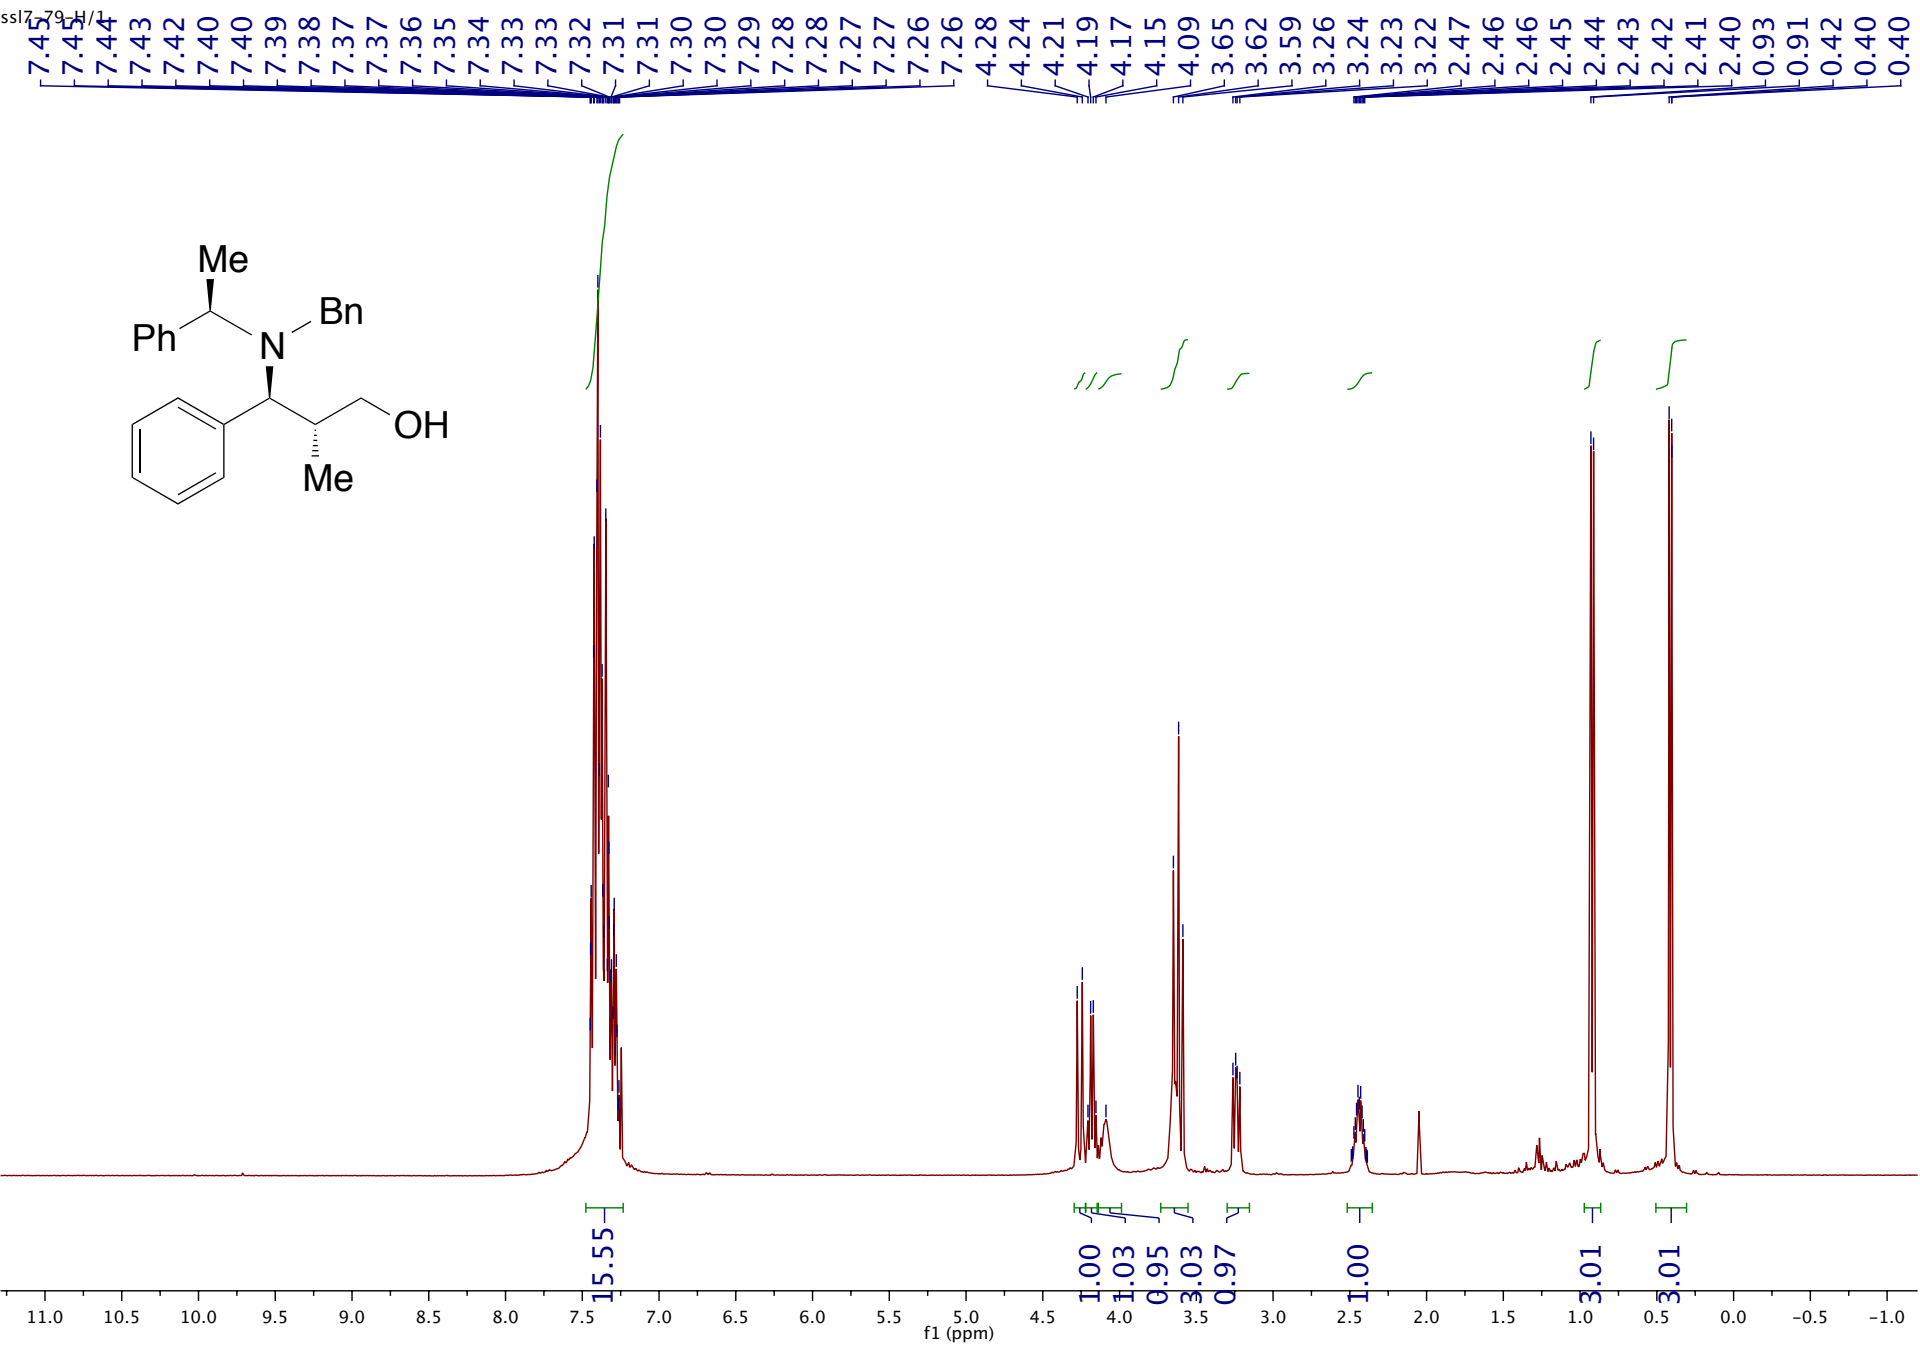

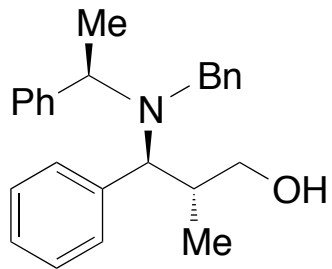

- 143.66
- 139.36
- 139.34
- 129.73
- 129.43
- 128.77
- 128.49
- 128.33
- 128.16
- 127.41
- 127.34
- 127.20
- 77.48 CDCl3
- 77.16 CDCl3
- 76.84 CDCl3
- 68.41
- 66.65
- 55.99
- 51.48
- 35.81
- 15.43
- 13.65

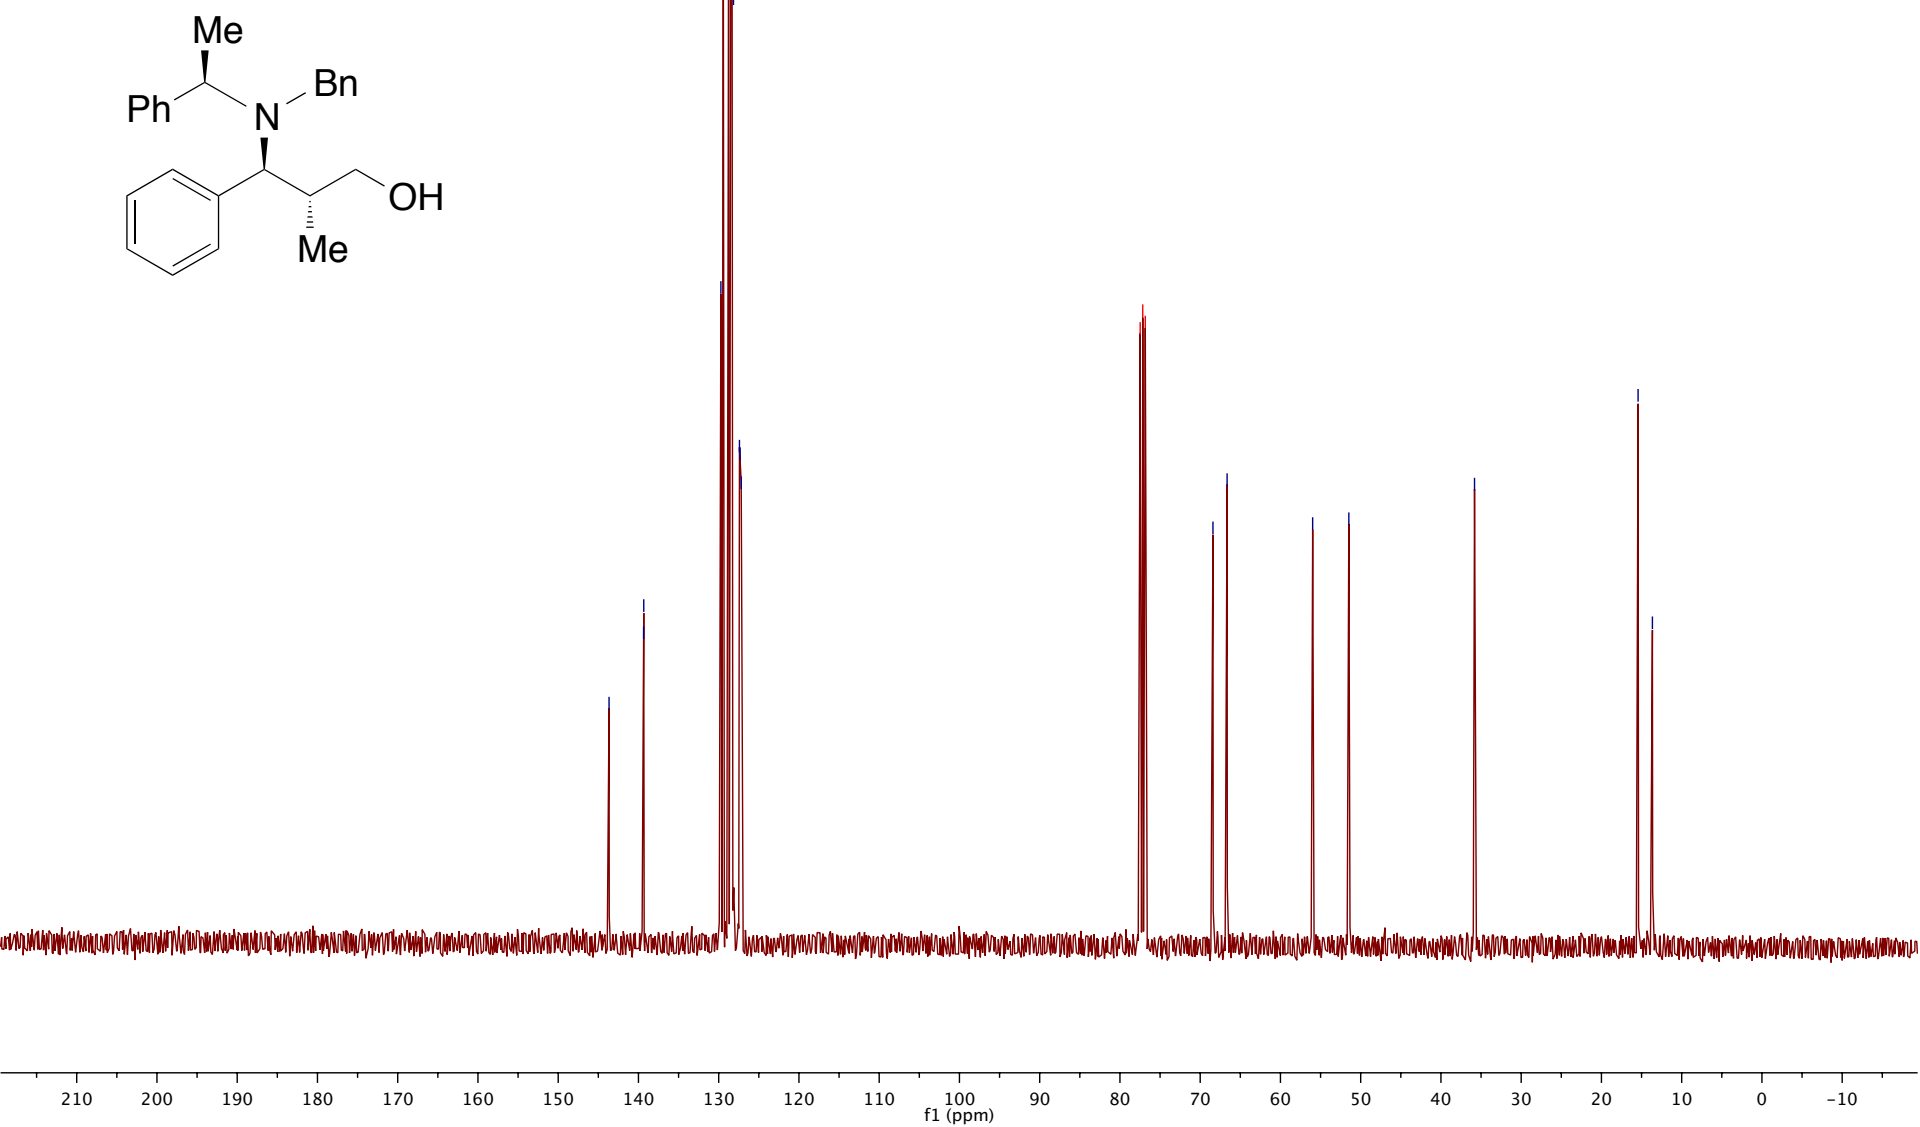

-7.26

Reaction using Rac-L1 as ligand

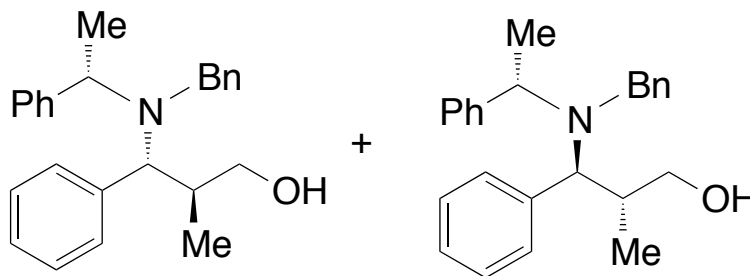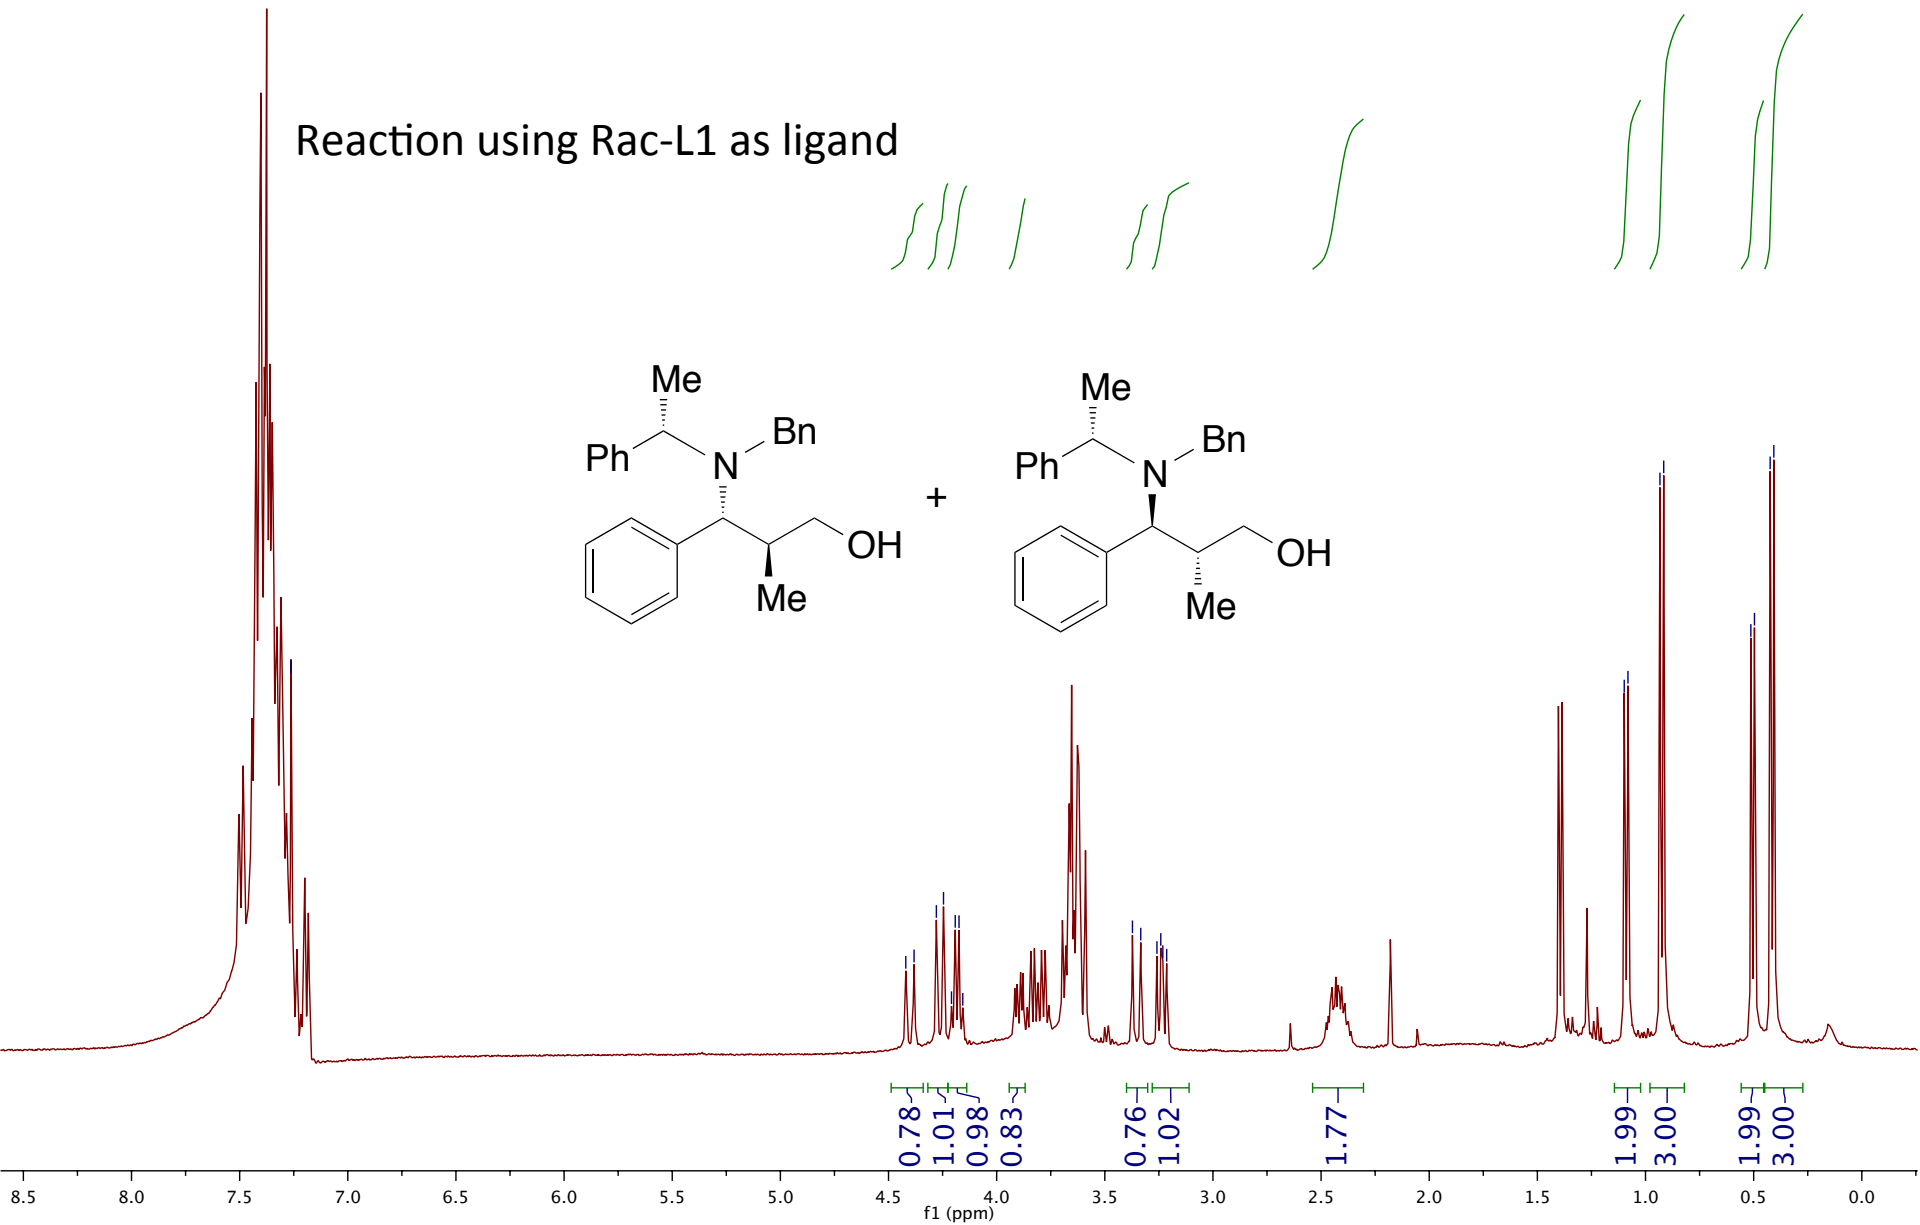

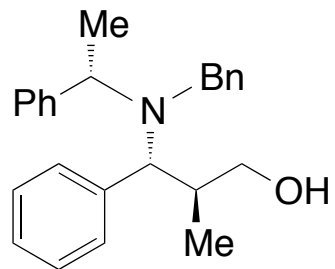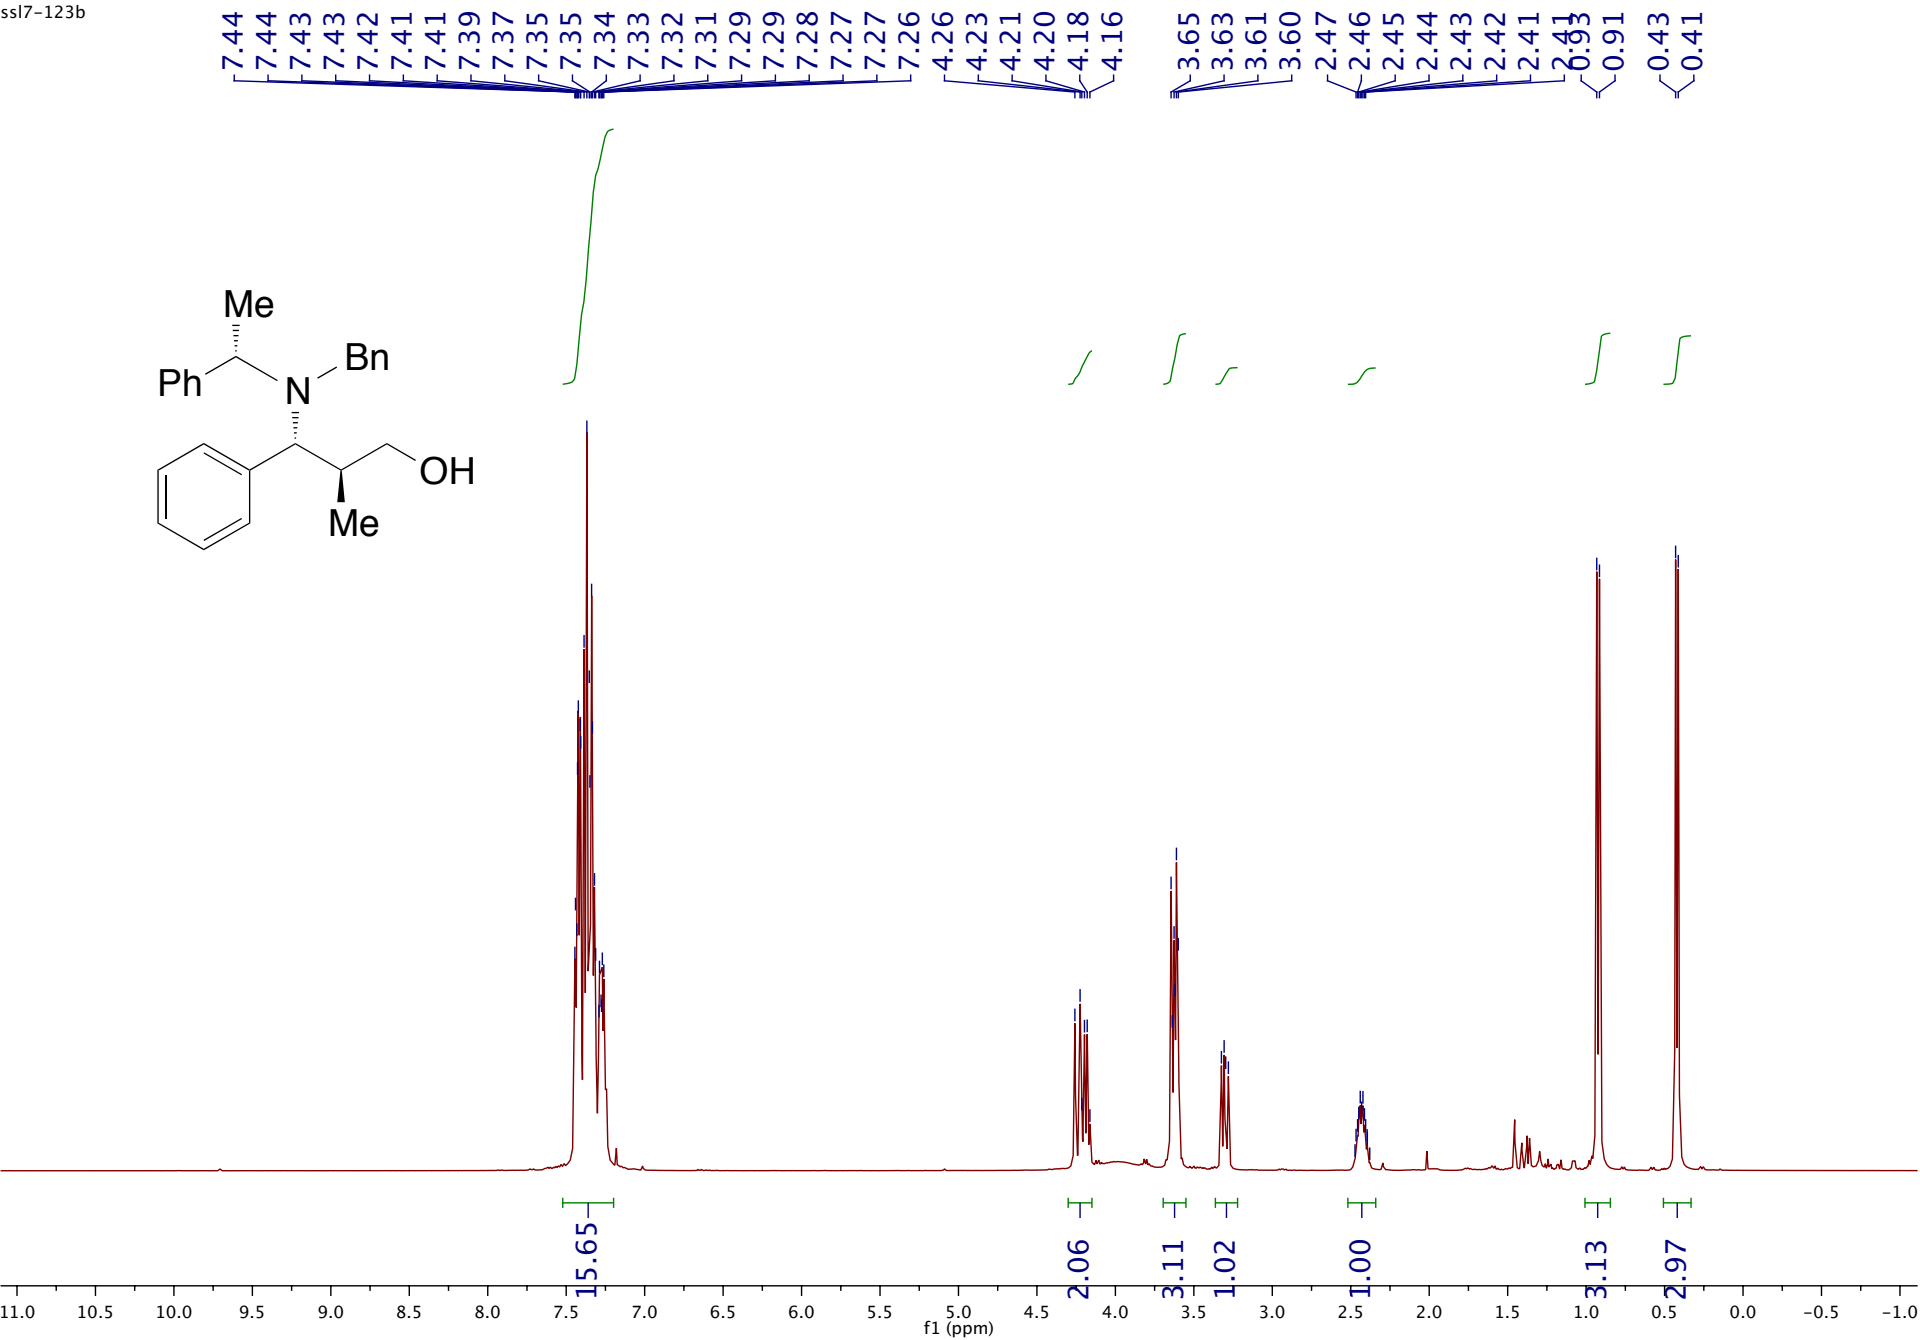

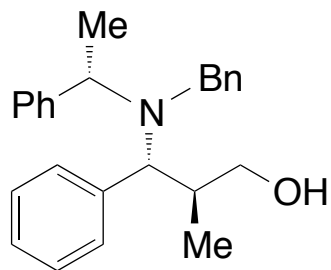

- 143.55
- 139.28
- 139.26
- 129.55
- 129.26
- 128.59
- 128.32
- 128.17
- 128.02
- 127.23
- 127.18
- 127.02
- 77.48 CDCl3
- 77.16 CDCl3
- 76.84 CDCl3
- 68.08
- 66.39
- 55.81
- 51.28
- 35.73
- 15.28
- 13.47

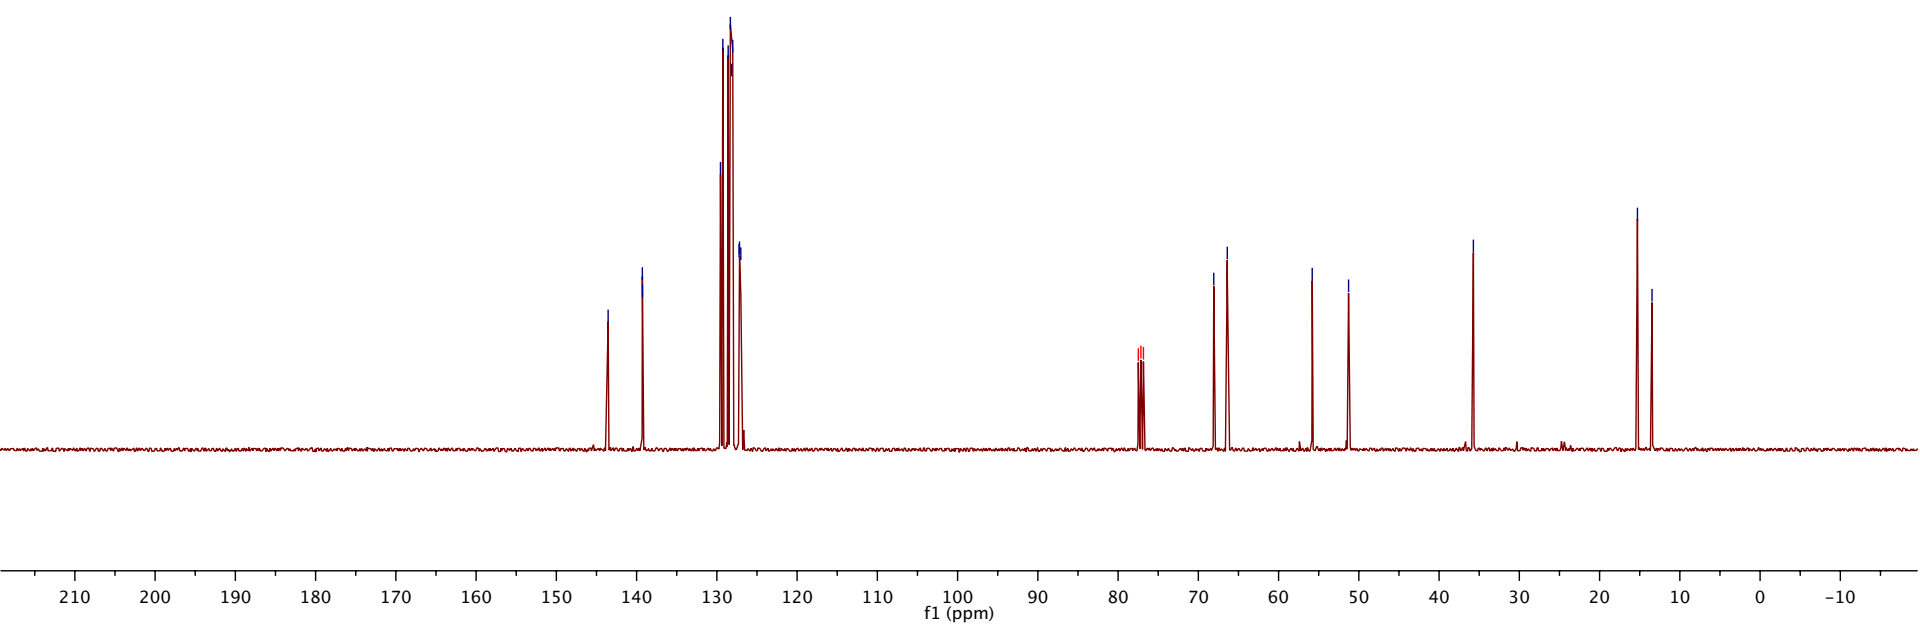

ssl7\_124a

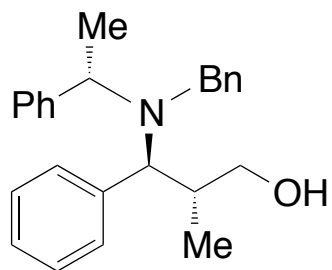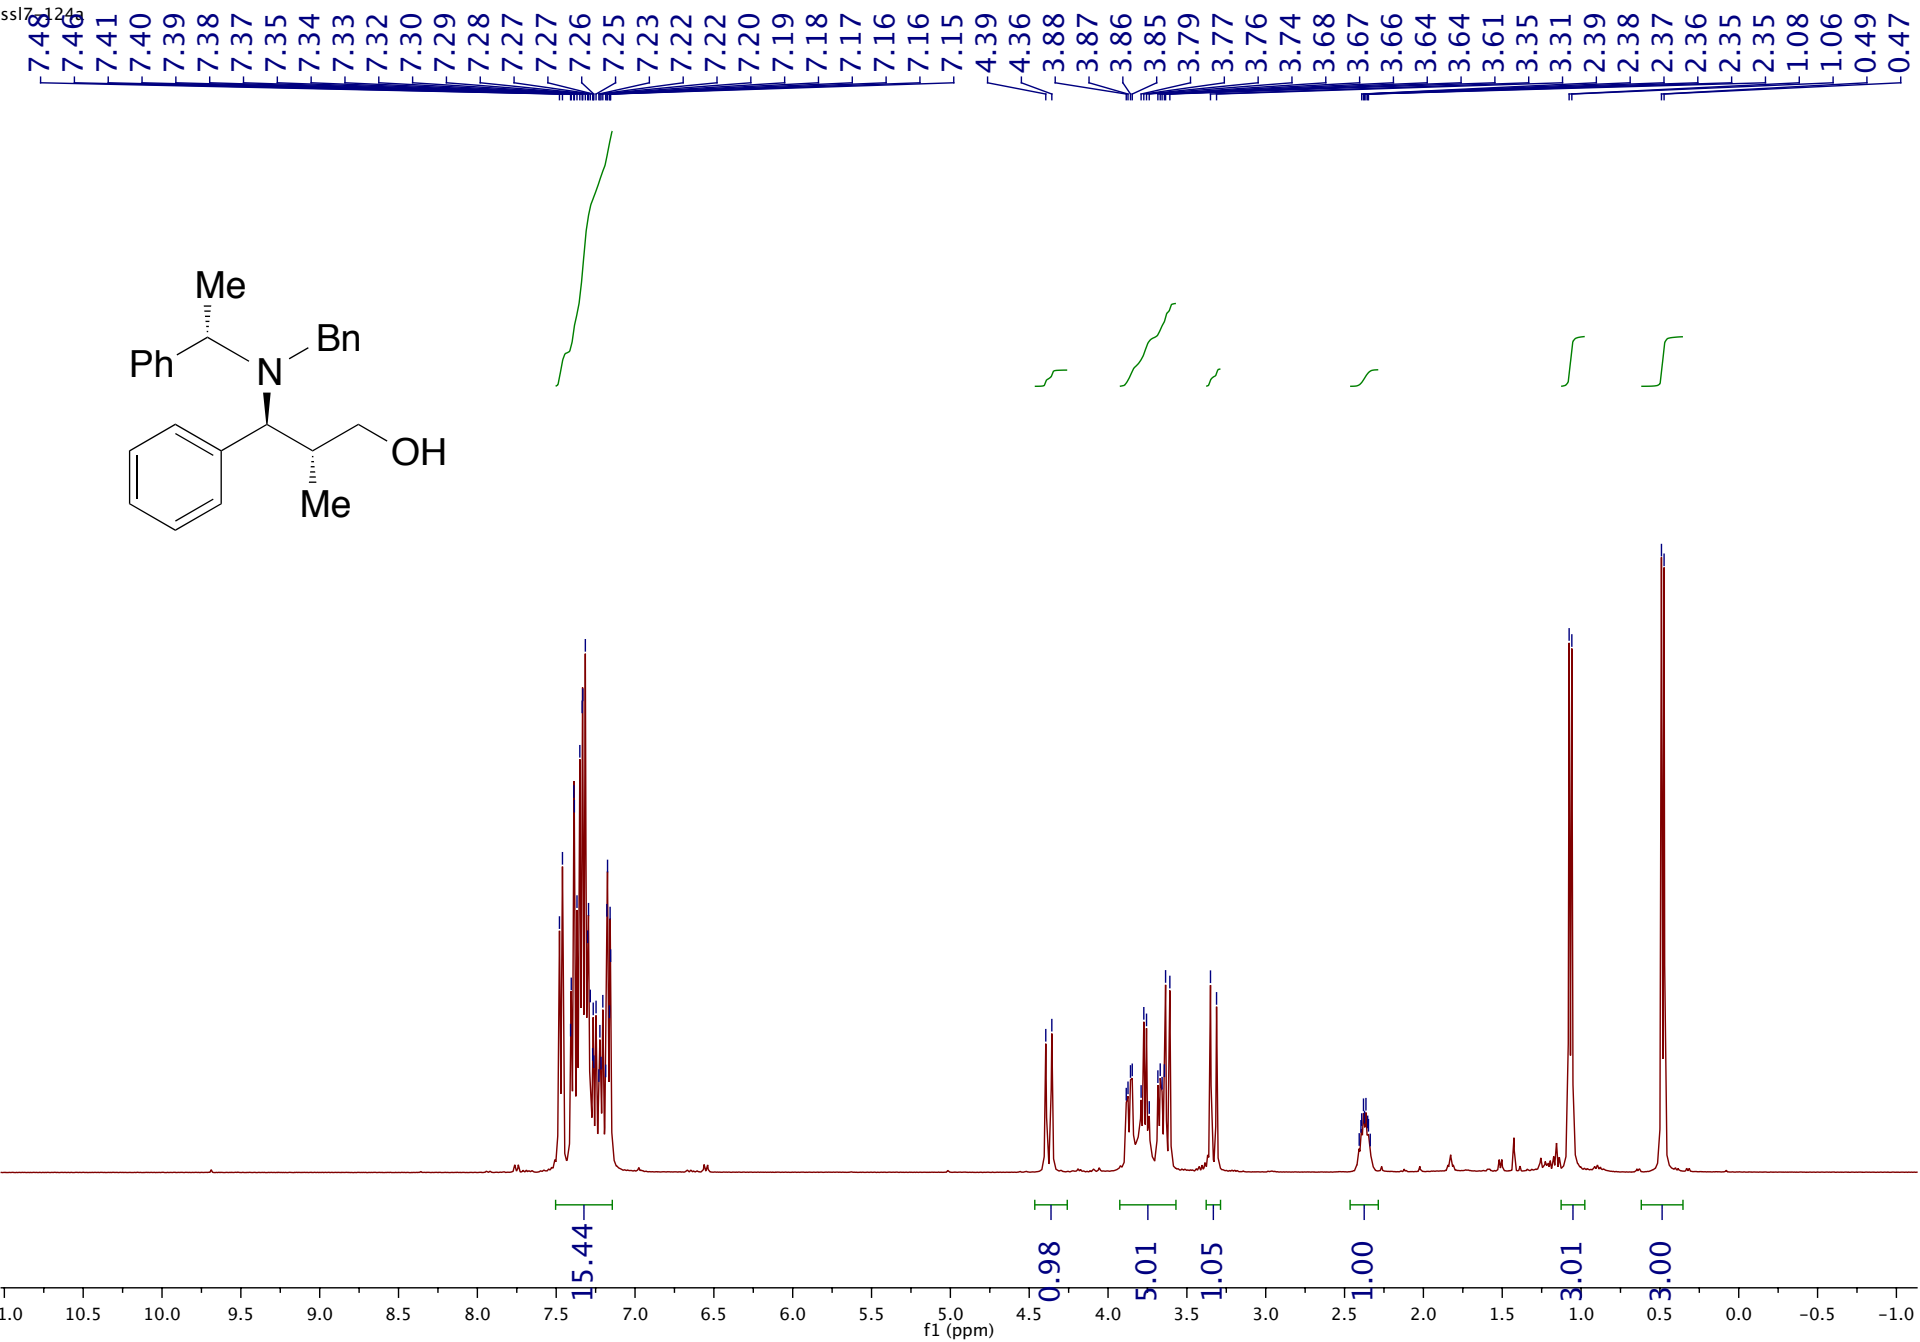



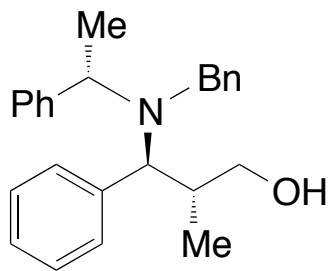

146.03  
142.40  
136.73  
130.09  
128.83  
128.49  
127.97  
127.84  
127.60  
127.32  
127.15  
126.61

77.48 CDCl<sub>3</sub>  
77.16 CDCl<sub>3</sub>  
76.84 CDCl<sub>3</sub>

68.94  
67.78  
62.41

52.87

36.14

24.01

15.59

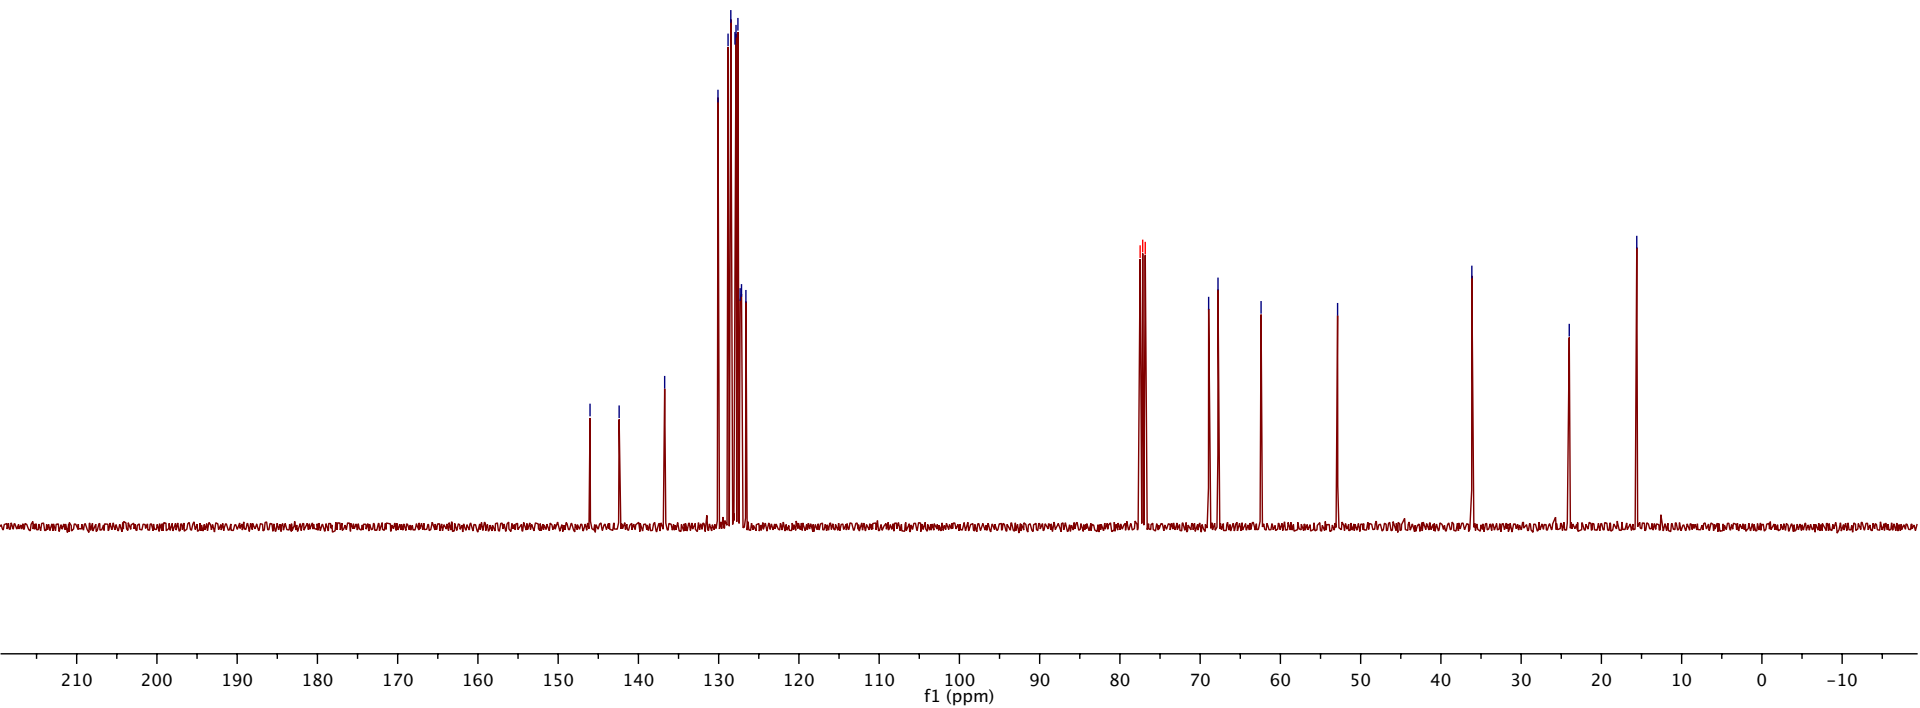

Reaction using Rac-L1 as ligand

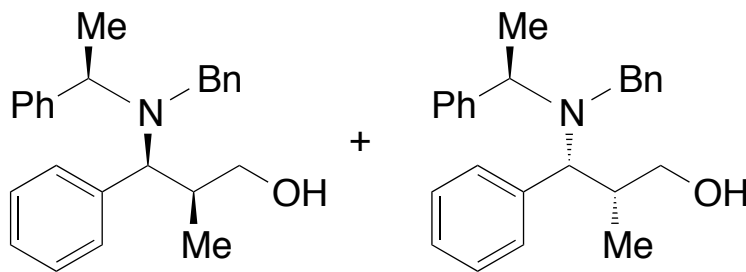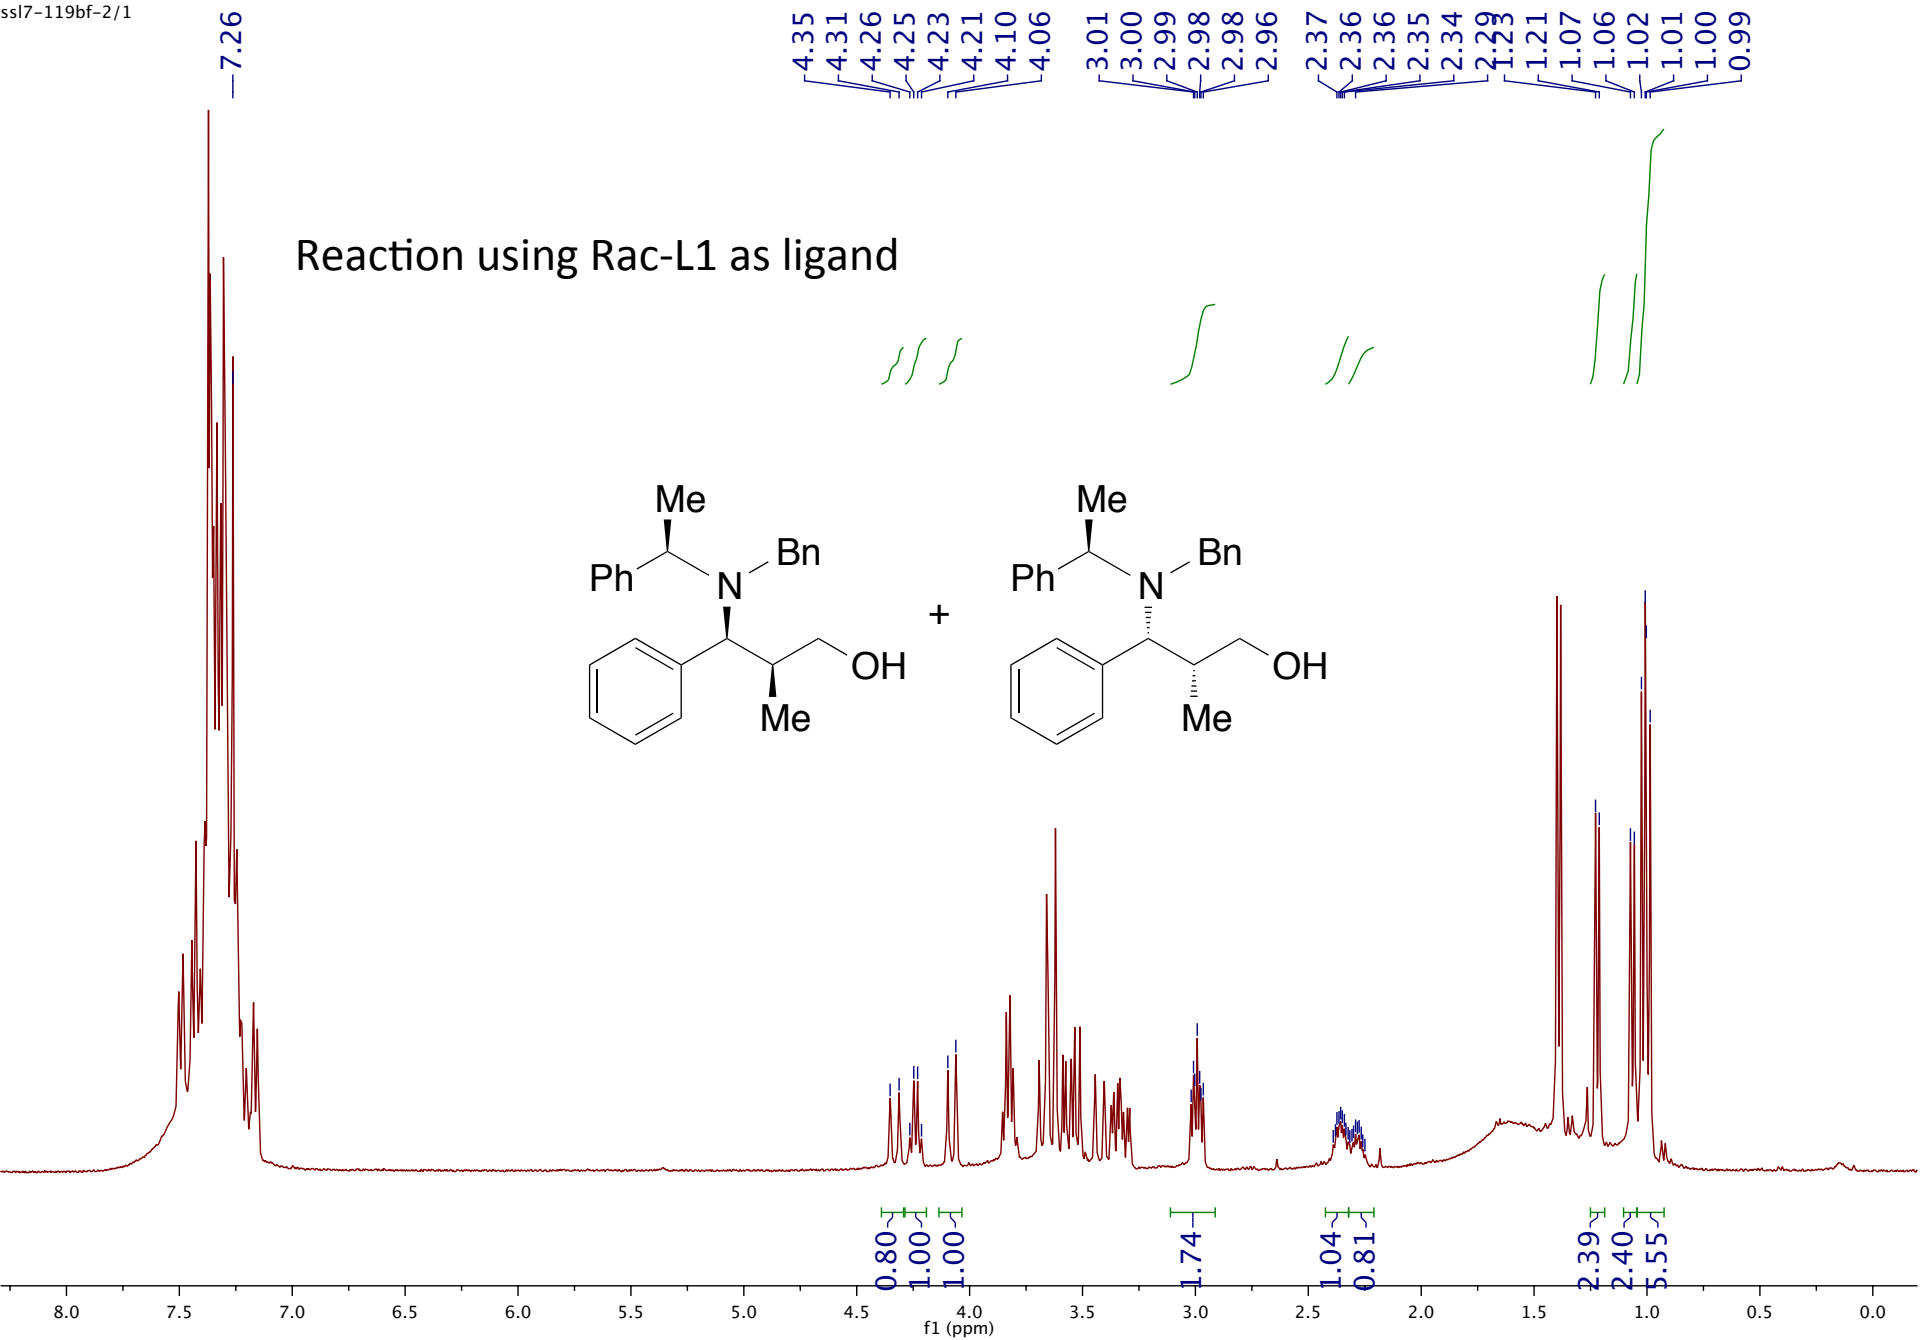

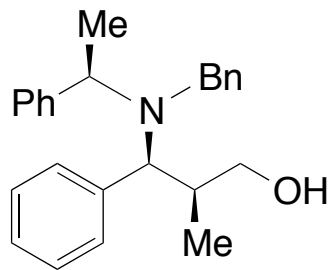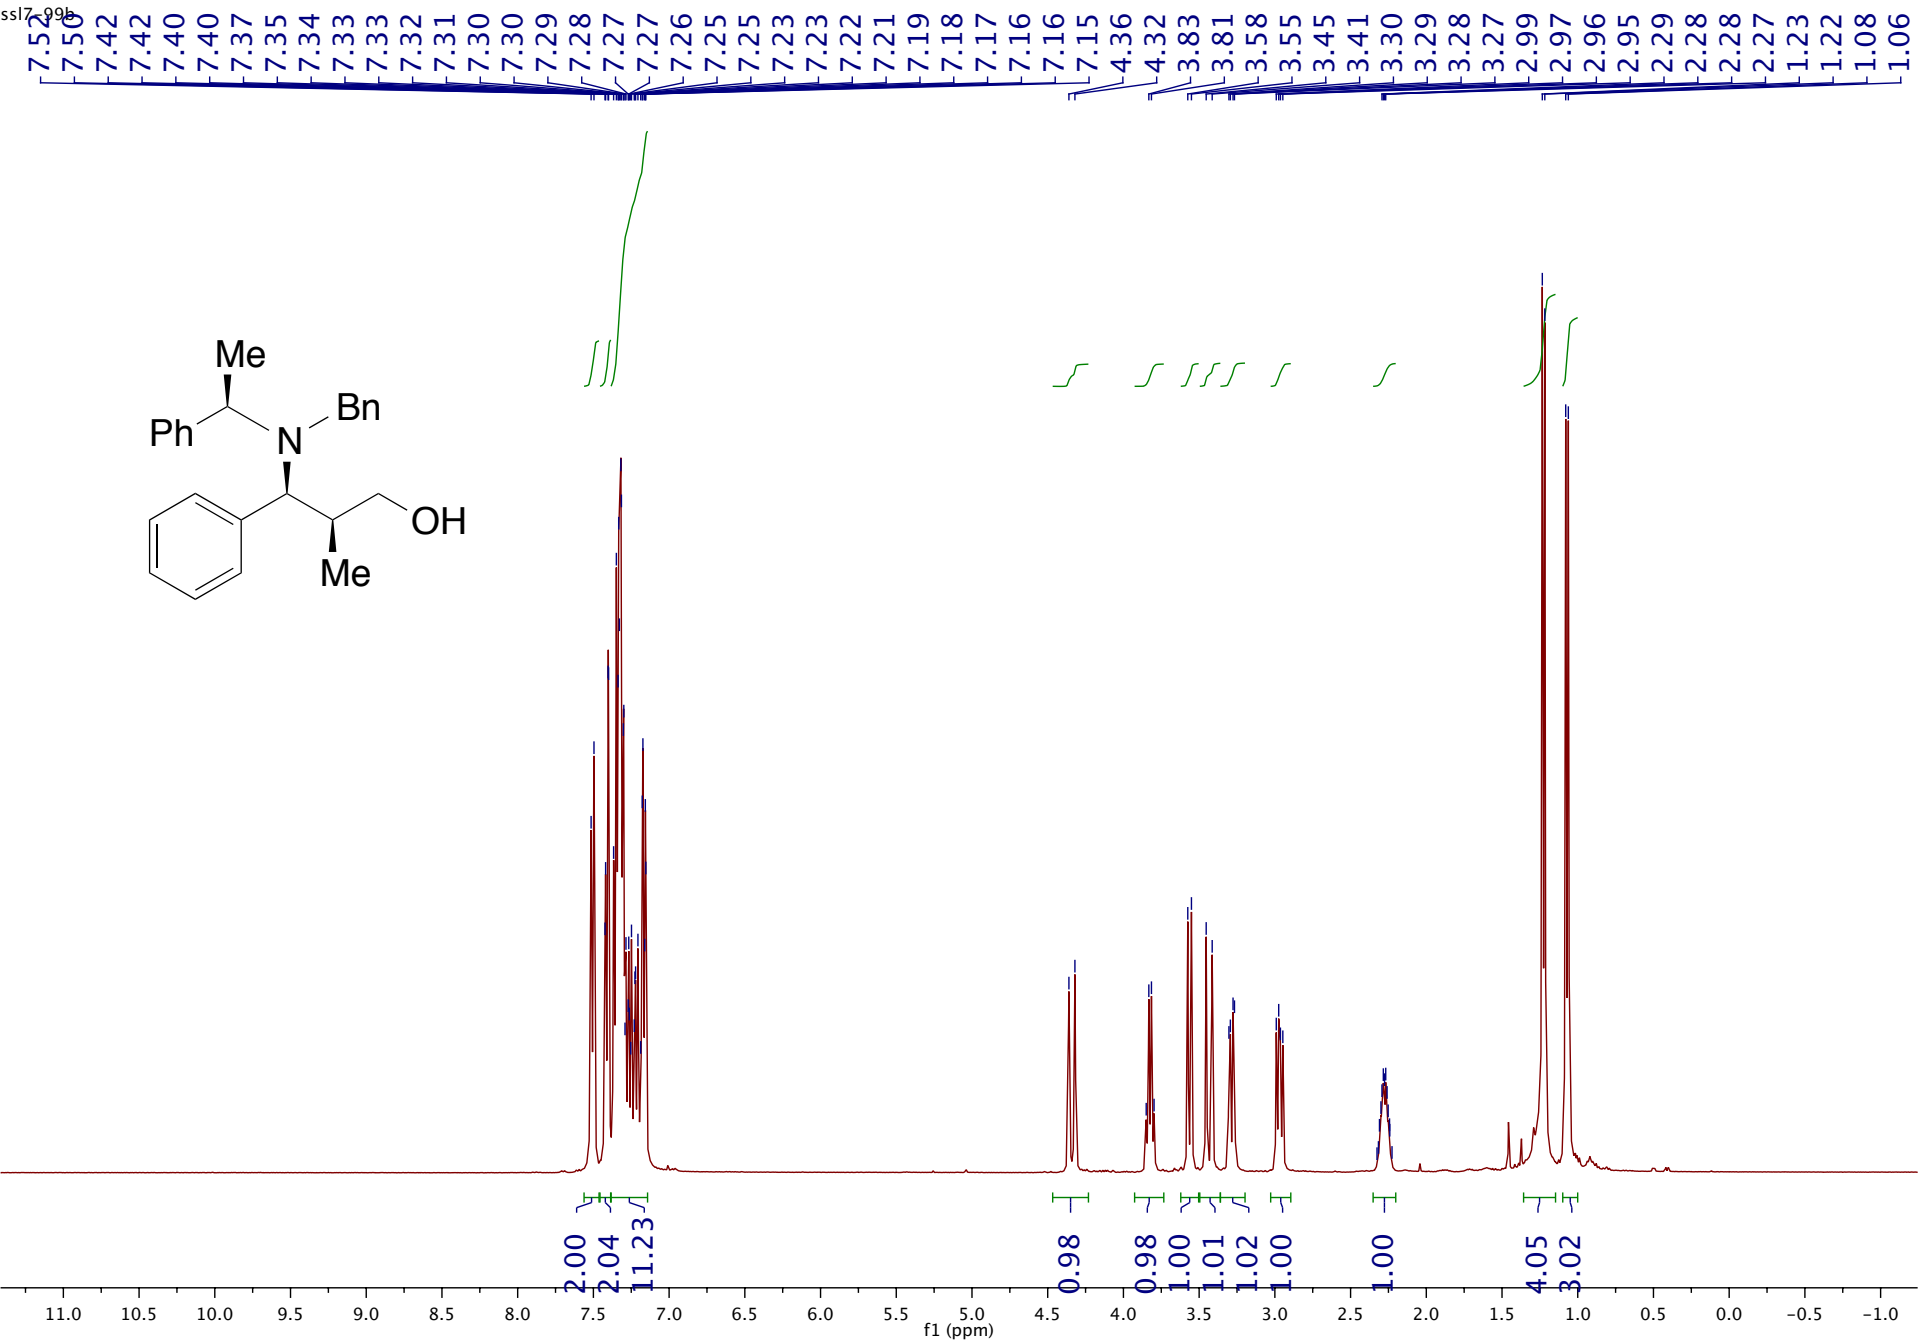

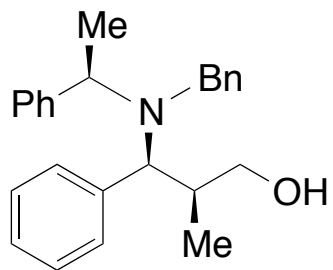

- ~145.82
- ~143.66
- ~138.04
- ~129.53
- ~128.40
- ~128.21
- ~128.05
- ~127.93
- ~127.51
- ~127.27
- ~126.79
- ~126.23
- 77.48 CDCl3
- 77.16 CDCl3
- 76.84 CDCl3
- ~67.99
- ~66.26
- ~61.63
- 51.77
- 37.85
- 23.35
- 15.99

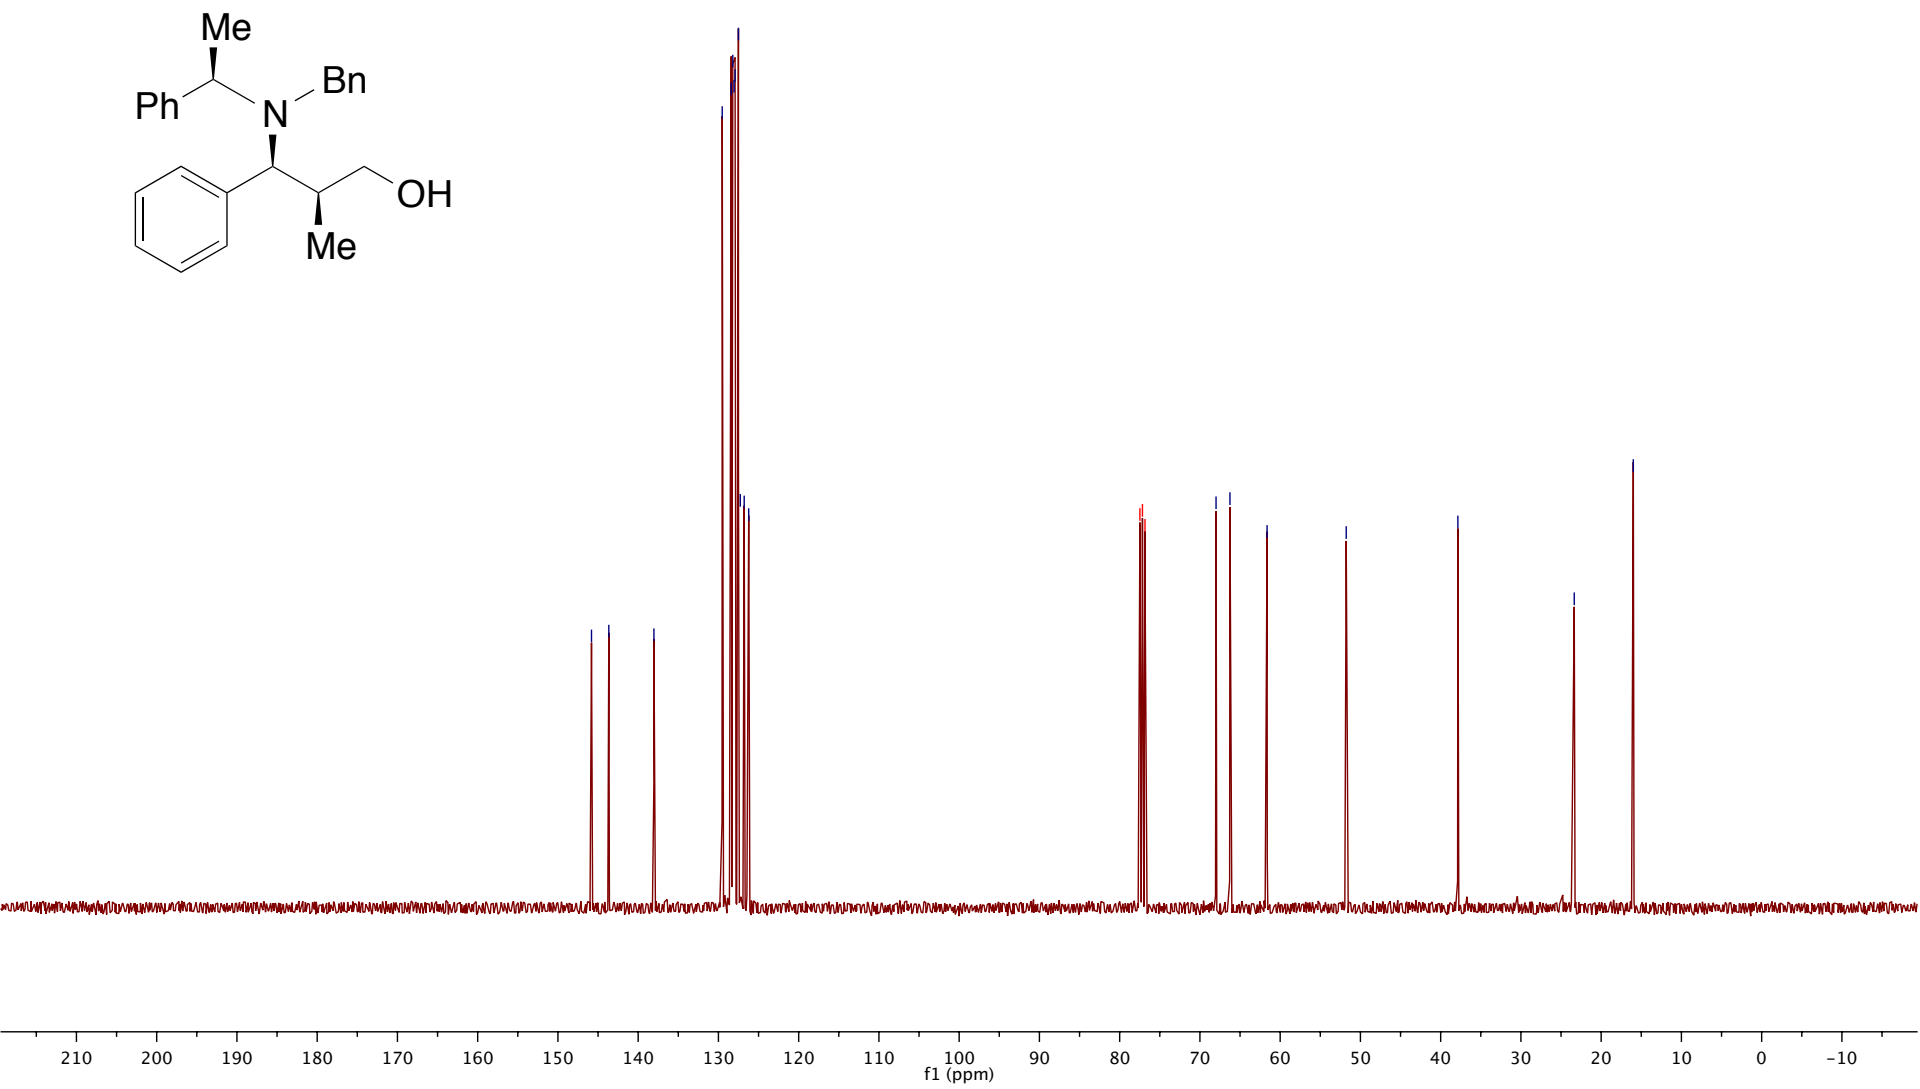

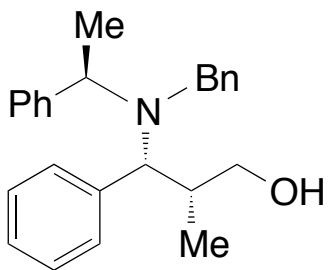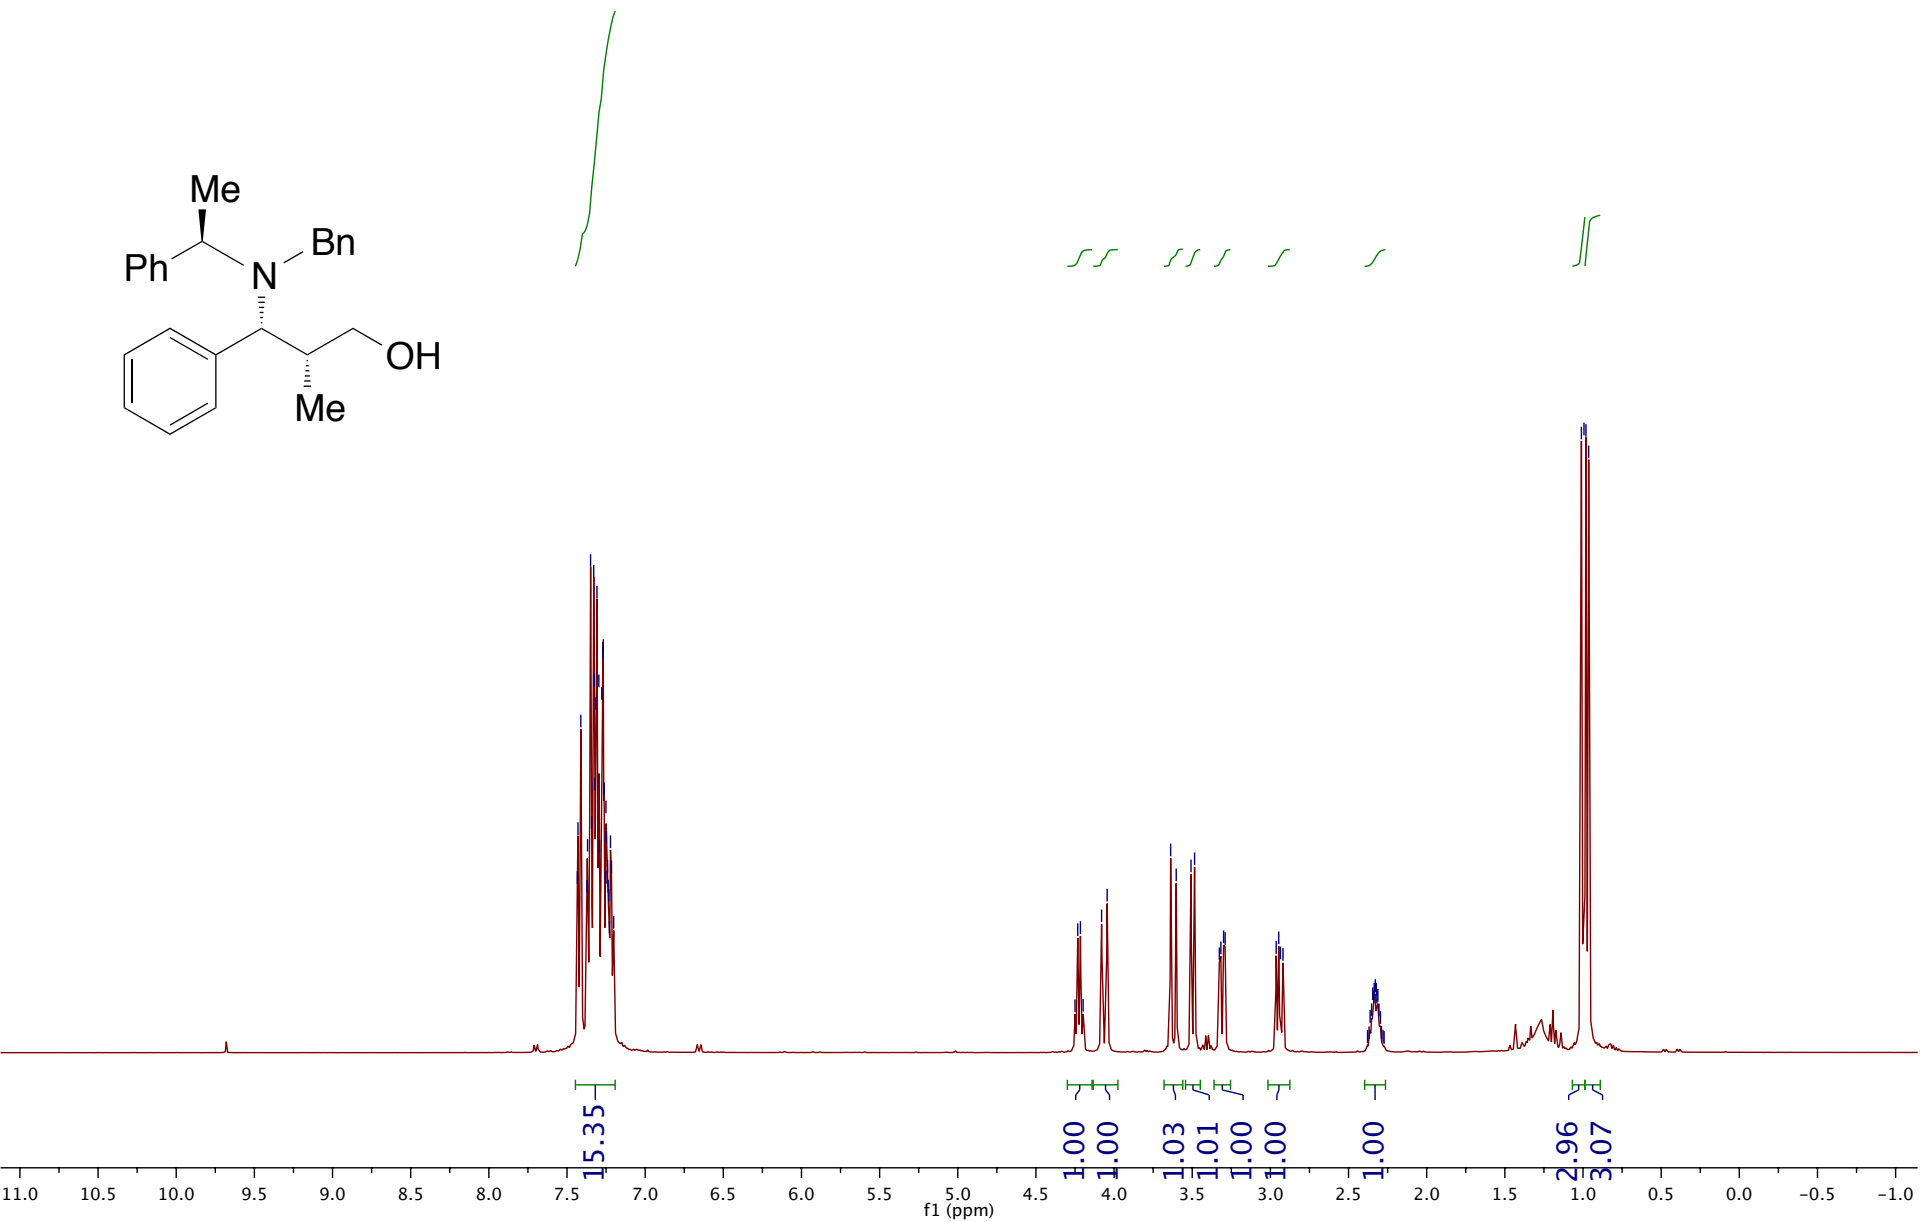

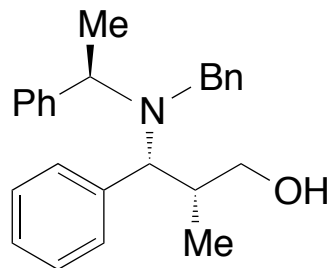

144.39  
 140.97  
 140.22  
 129.22  
 128.86  
 128.36  
 128.30  
 128.12  
 128.10  
 127.22  
 126.87  
 126.66

77.48 CDCl3  
 77.16 CDCl3  
 76.84 CDCl3

66.13  
 65.94

55.45  
 51.34

37.55

15.91  
 13.49

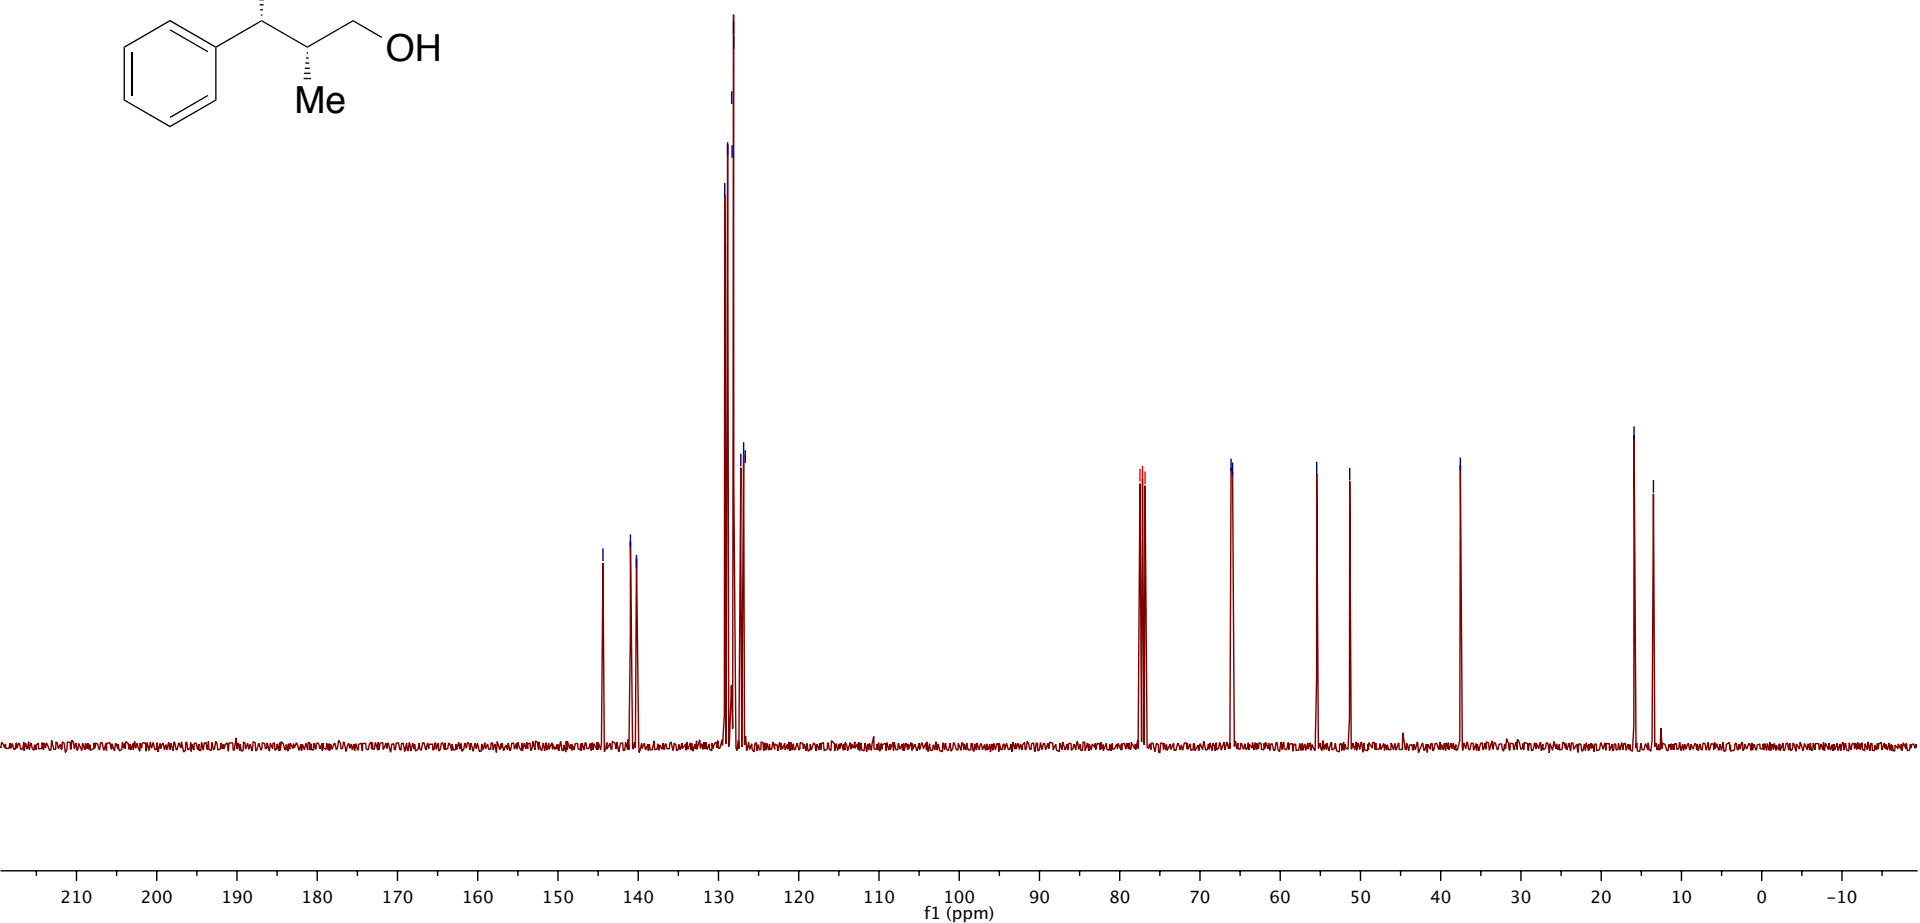

Reaction using Rac-L1 as ligand

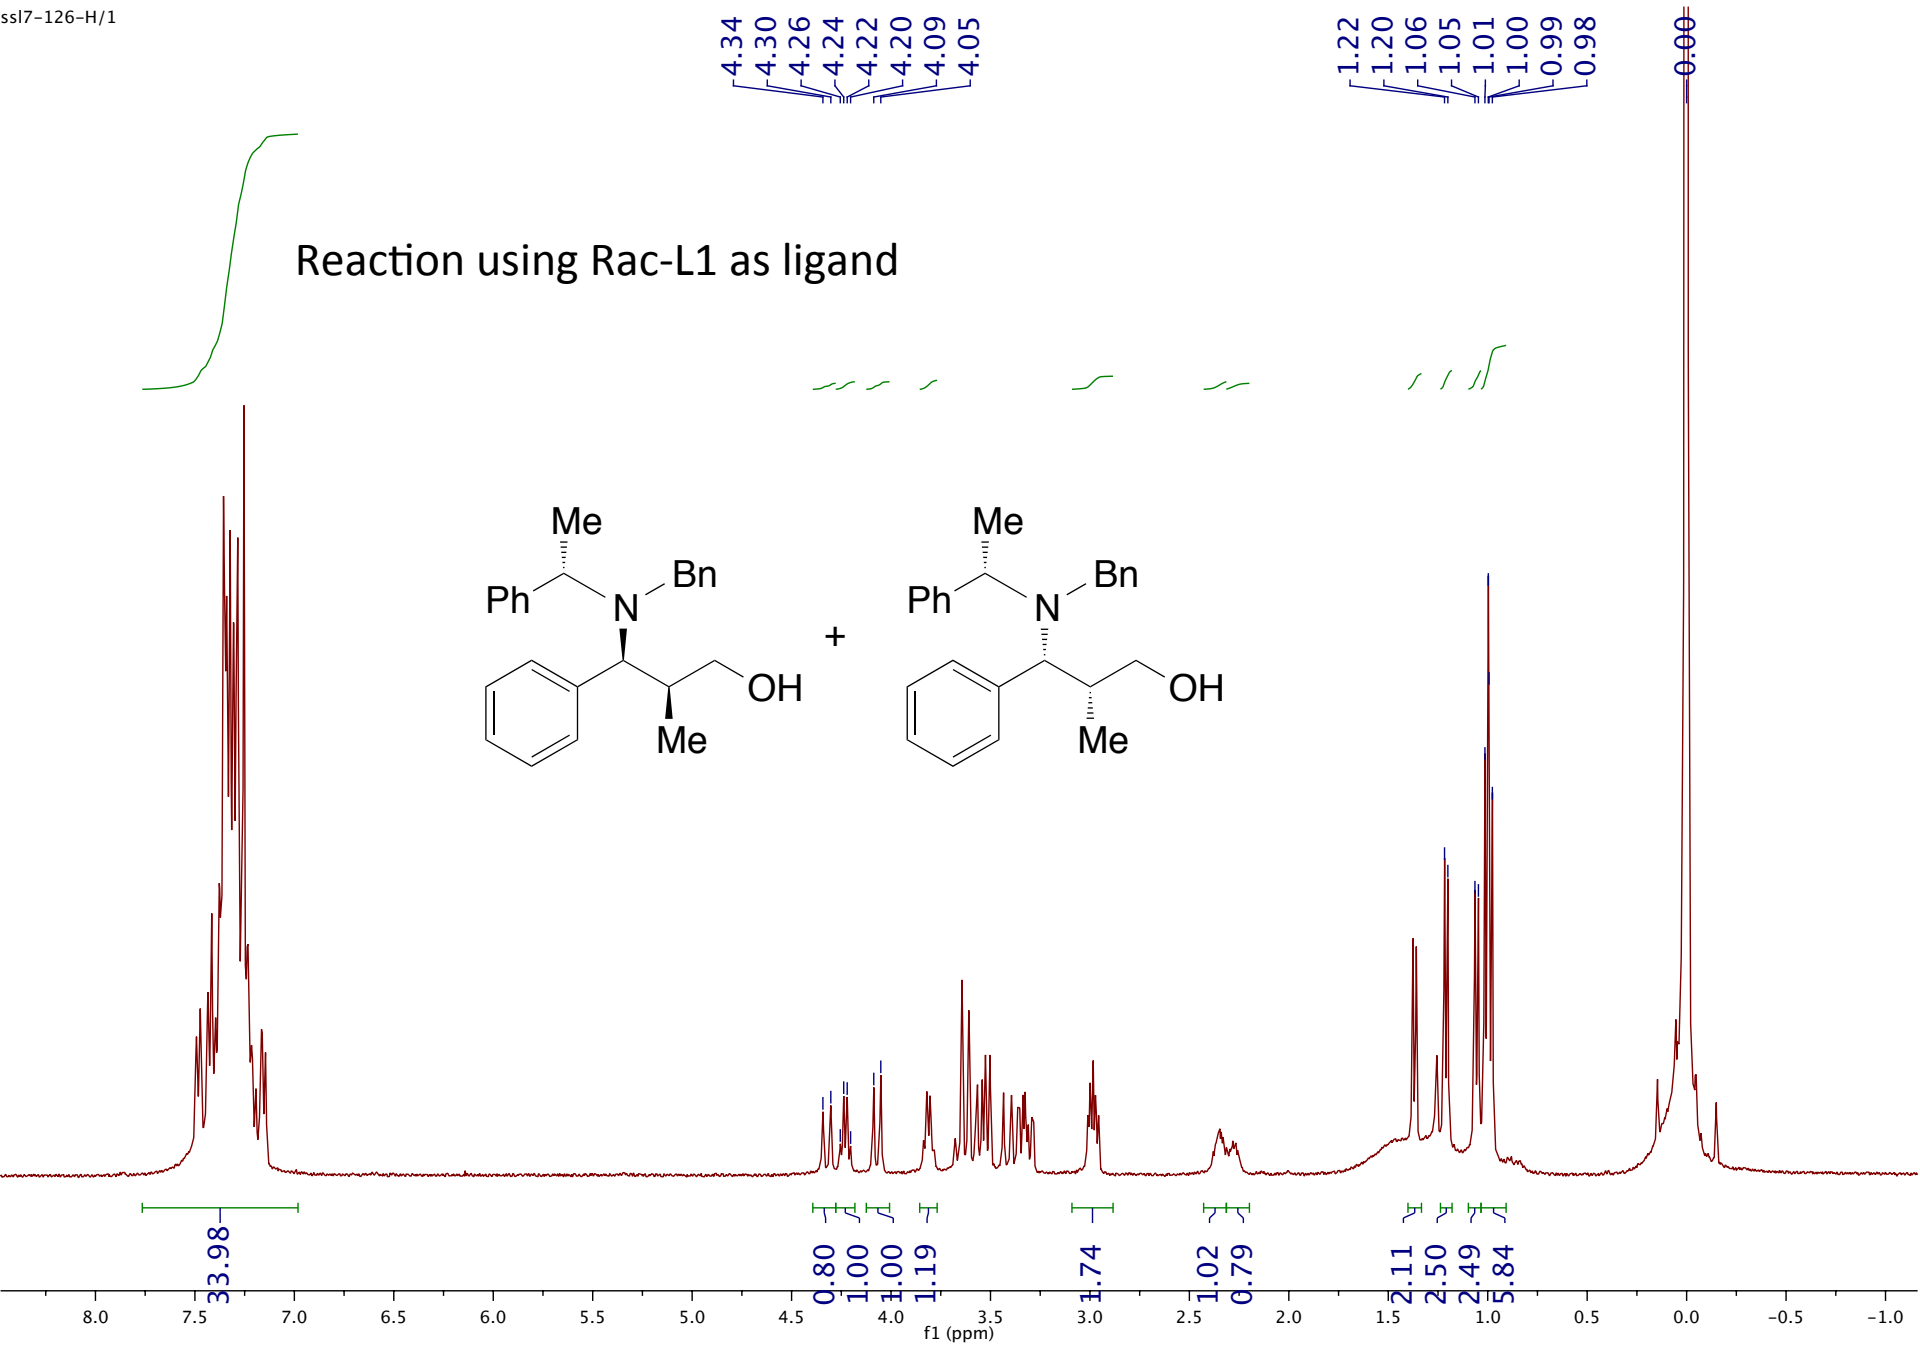

ss17\_100a

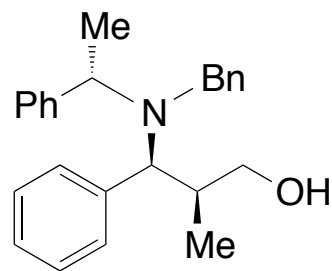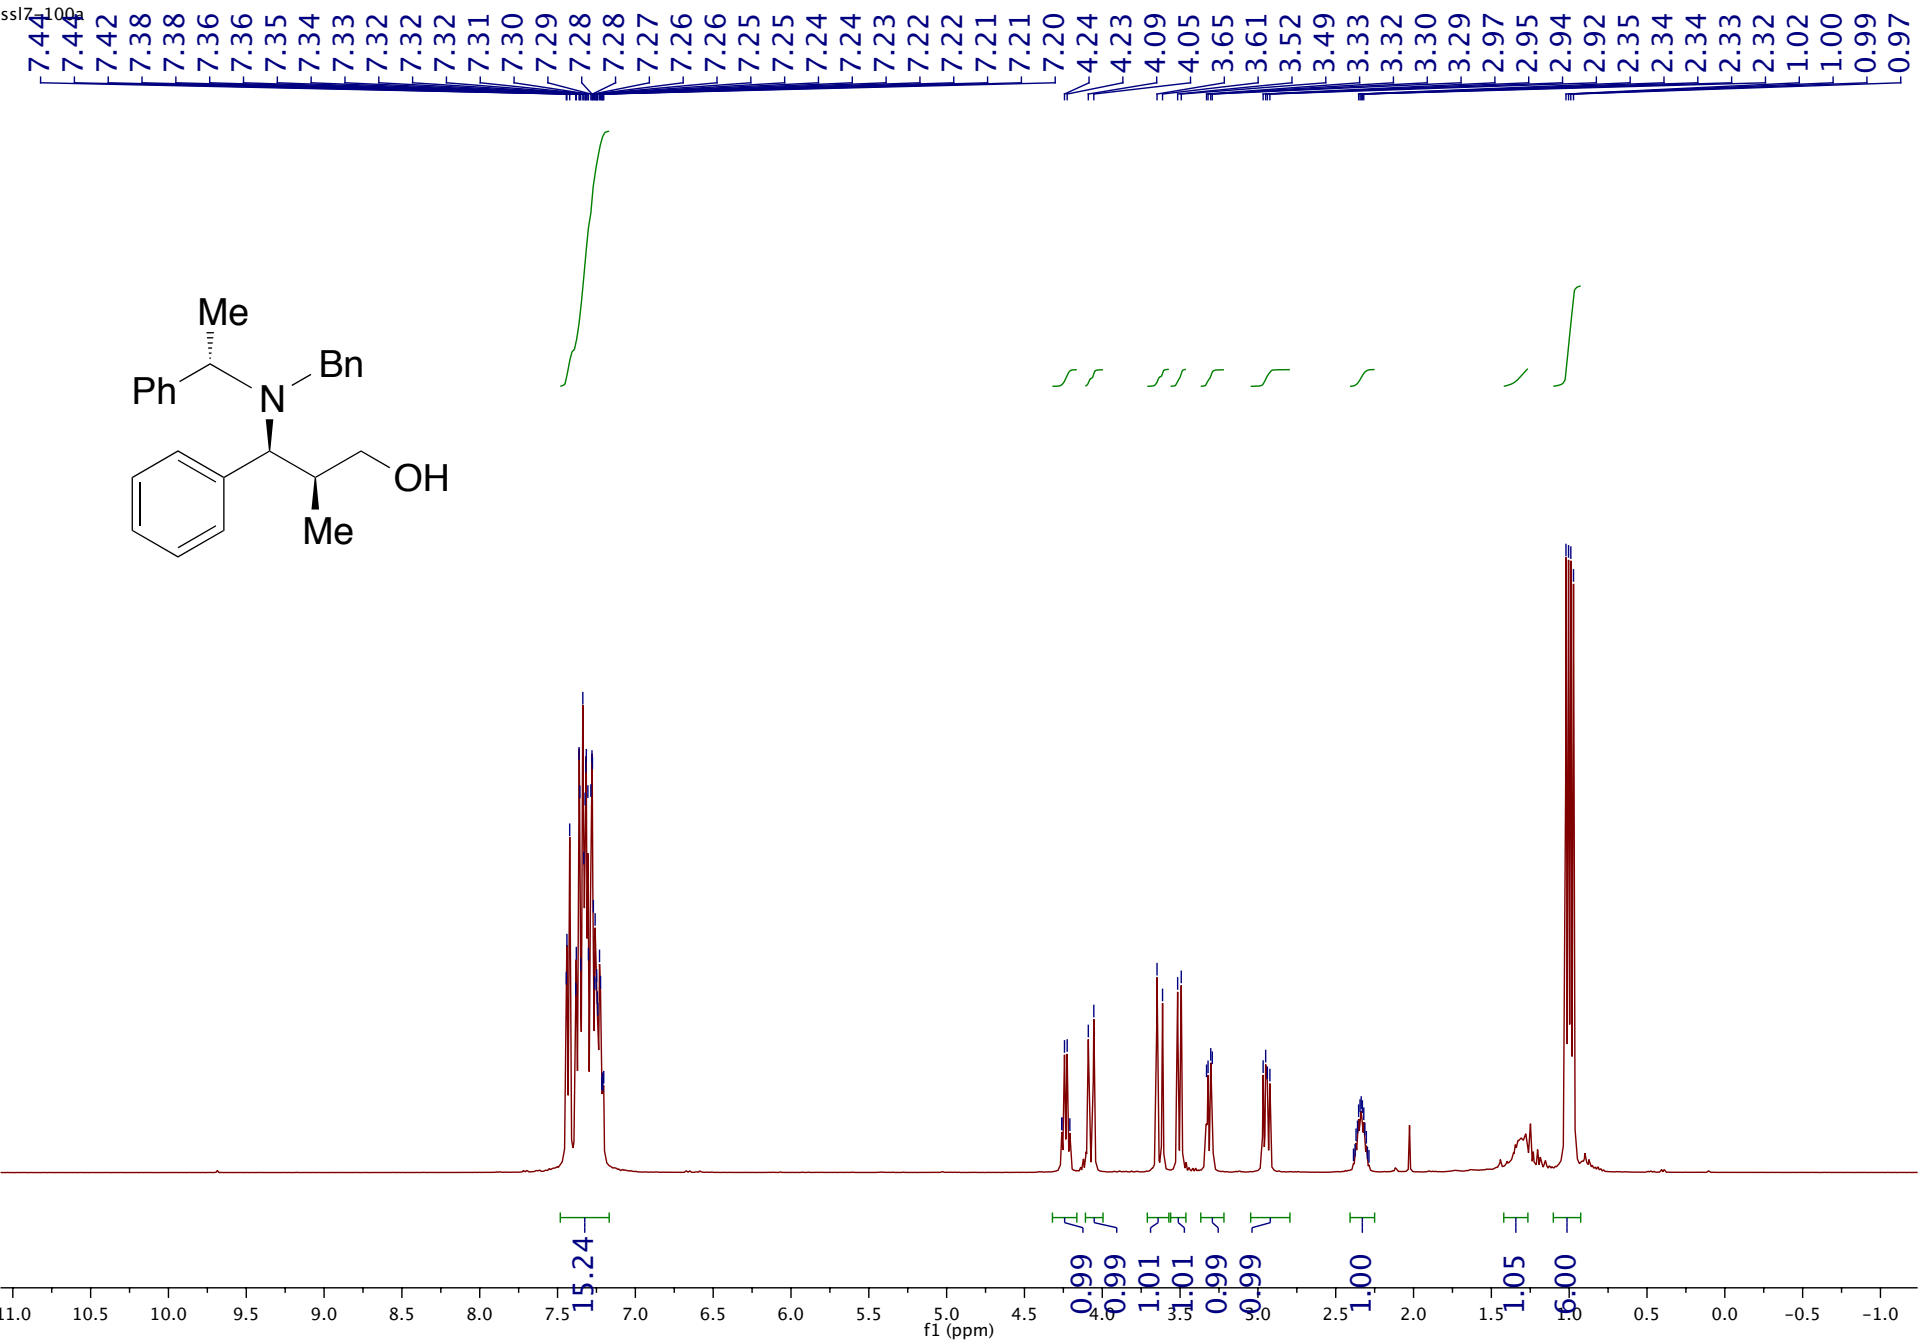



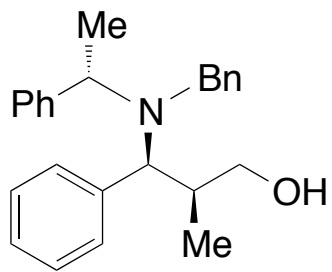

- 144.39
- 140.96
- 140.21
- 129.21
- 128.86
- 128.35
- 128.29
- 128.11
- 128.09
- 127.21
- 126.86
- 126.65
- 77.48 CDCl3
- 77.16 CDCl3
- 76.84 CDCl3
- 66.10
- 65.90
- 55.44
- 51.32
- 37.54
- 15.90
- 13.50

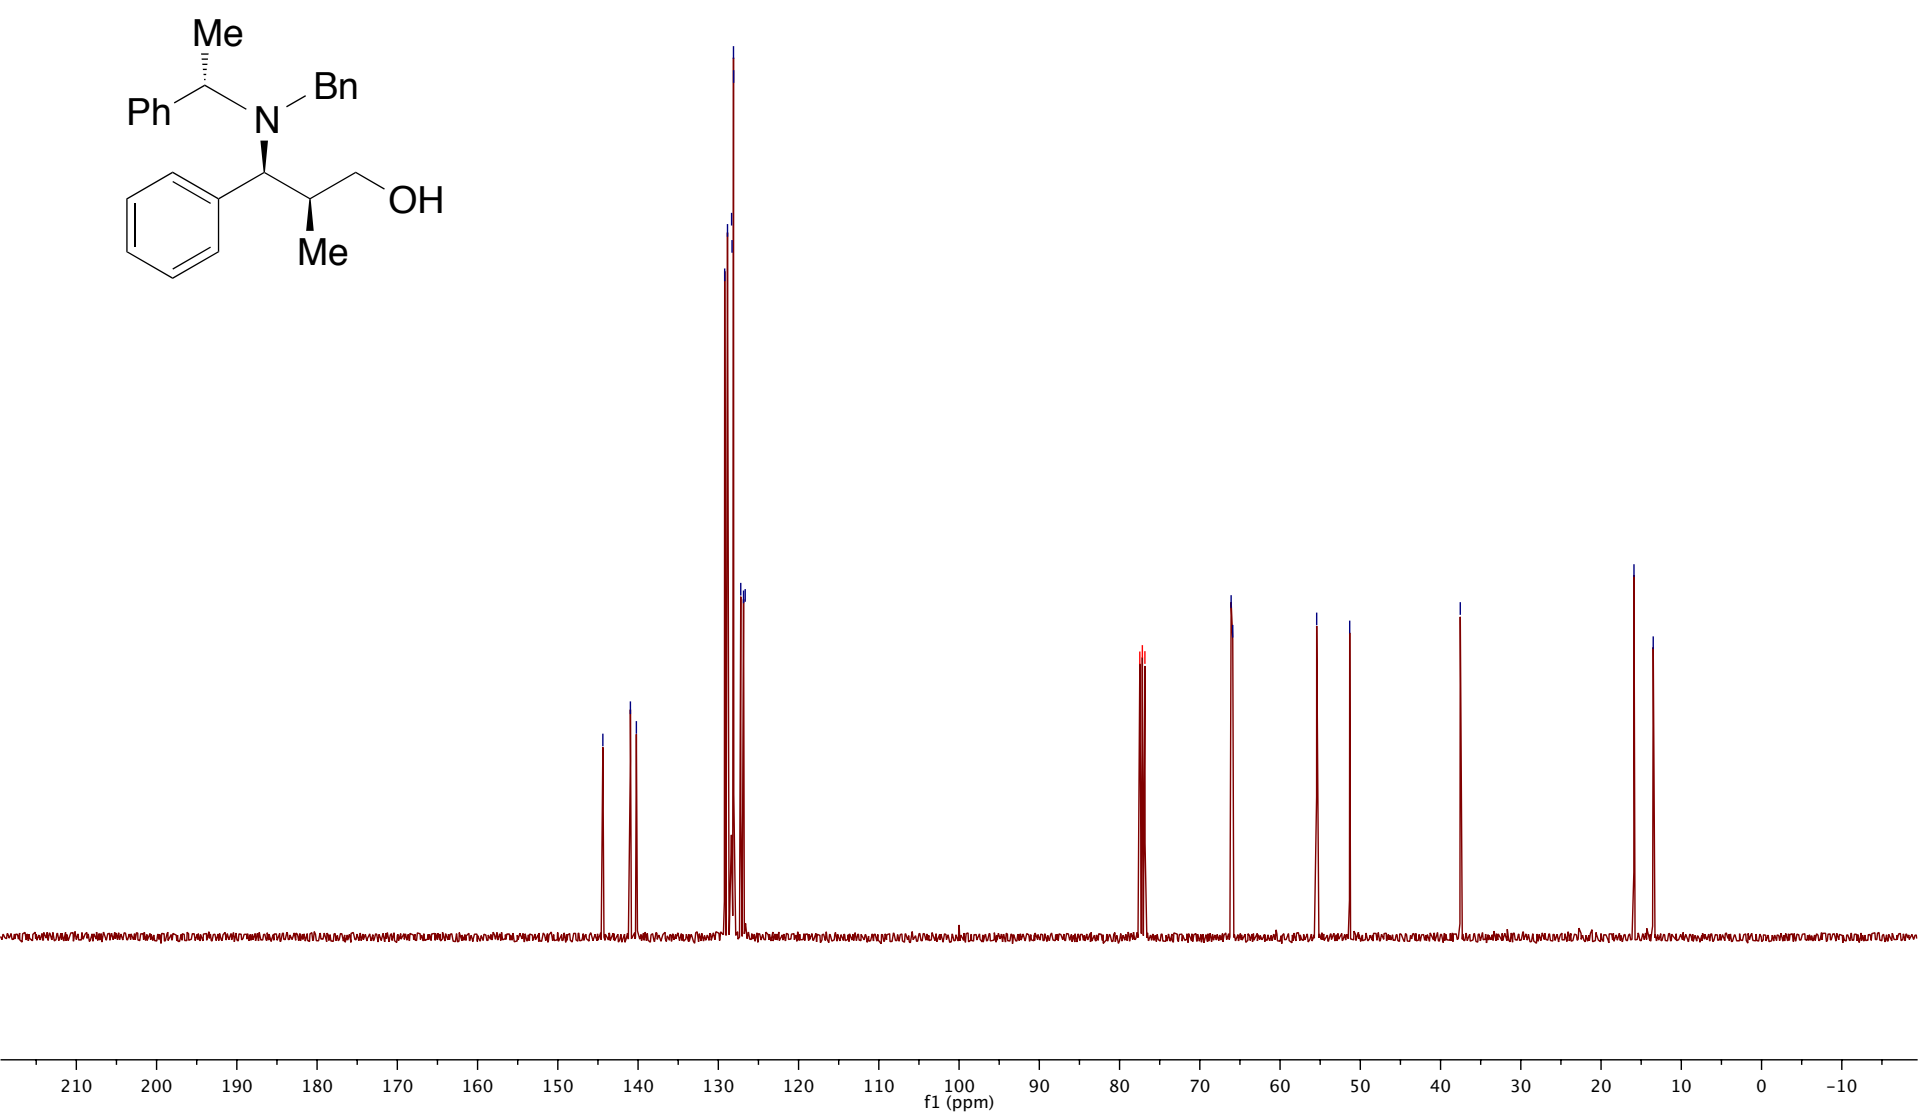

ssl7\_157

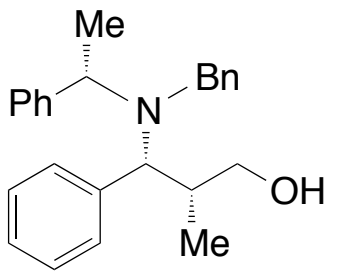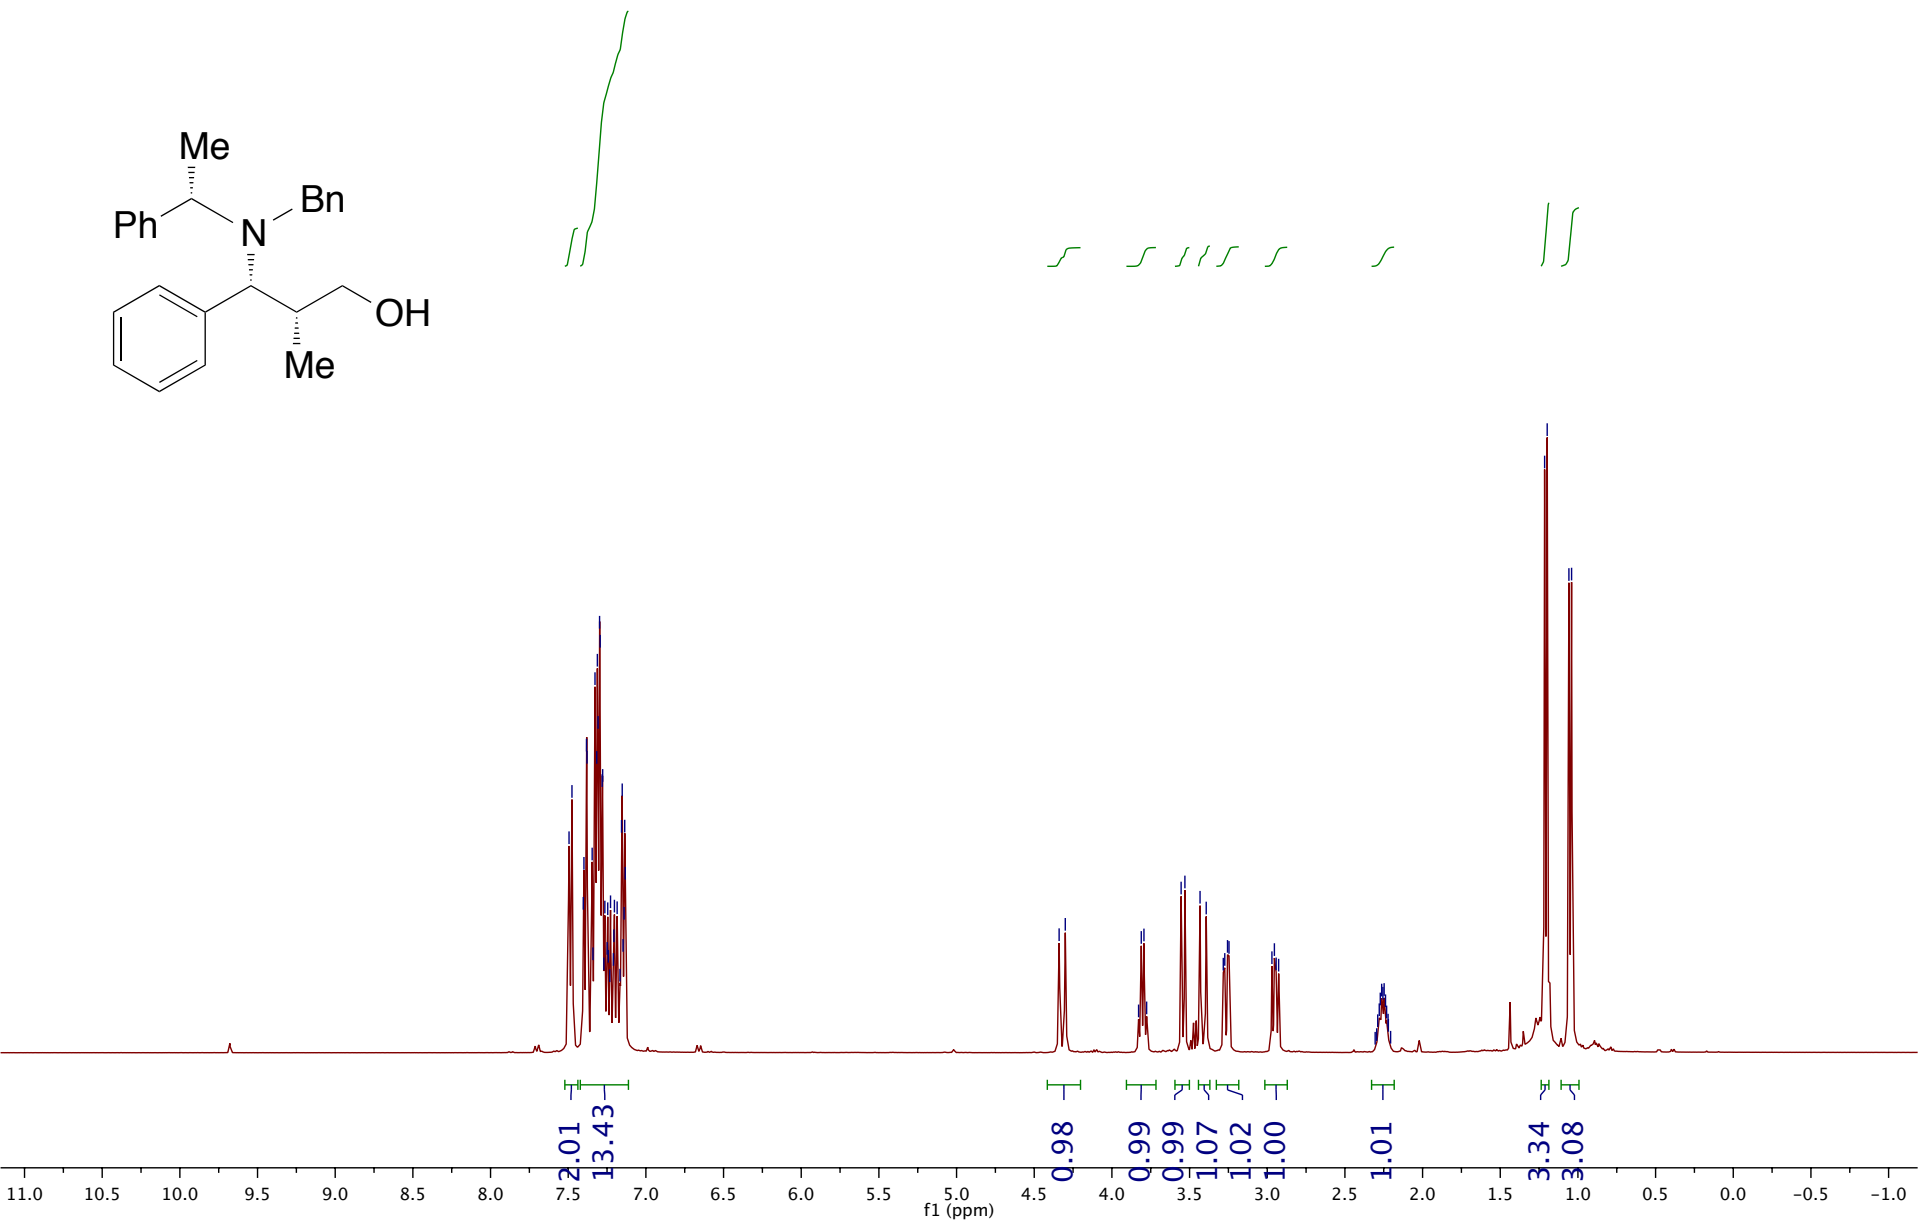

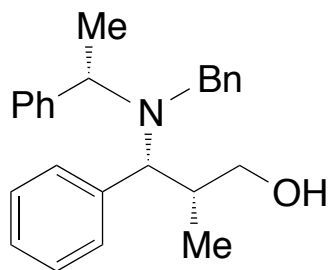

145.82  
 143.66  
 138.04  
 129.52  
 128.40  
 128.21  
 128.05  
 127.92  
 127.50  
 127.27  
 126.79  
 126.22

77.48 CDC13  
 77.16 CDC13  
 76.84 CDC13  
 67.98  
 66.25  
 61.63

51.77

37.86

23.36

15.99

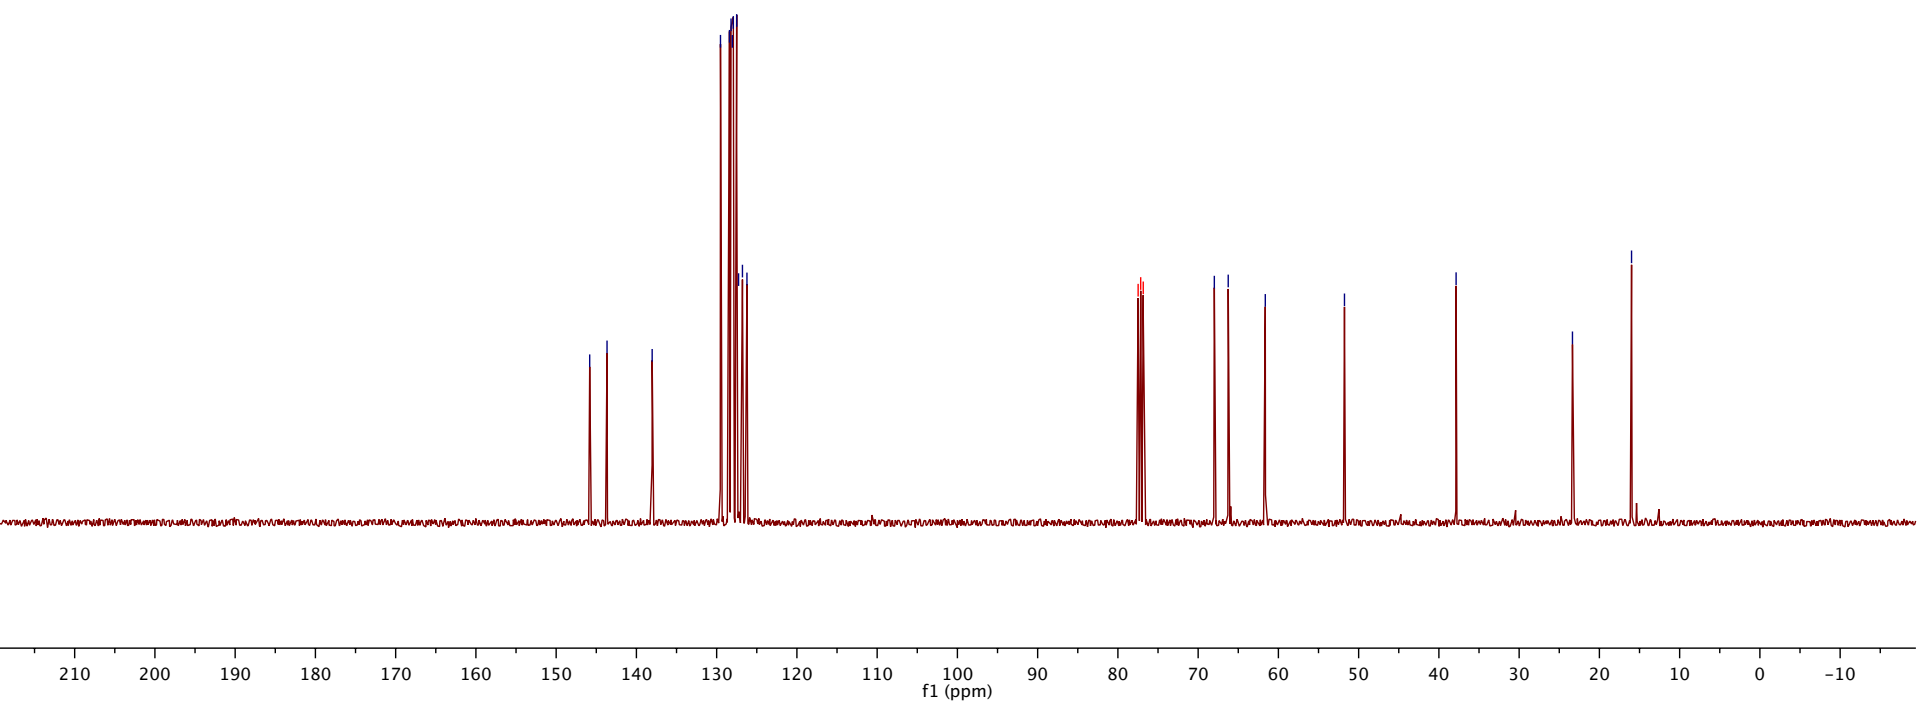

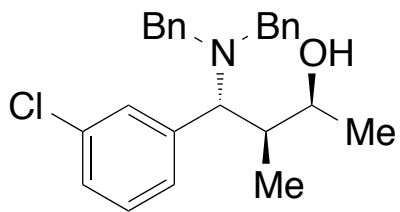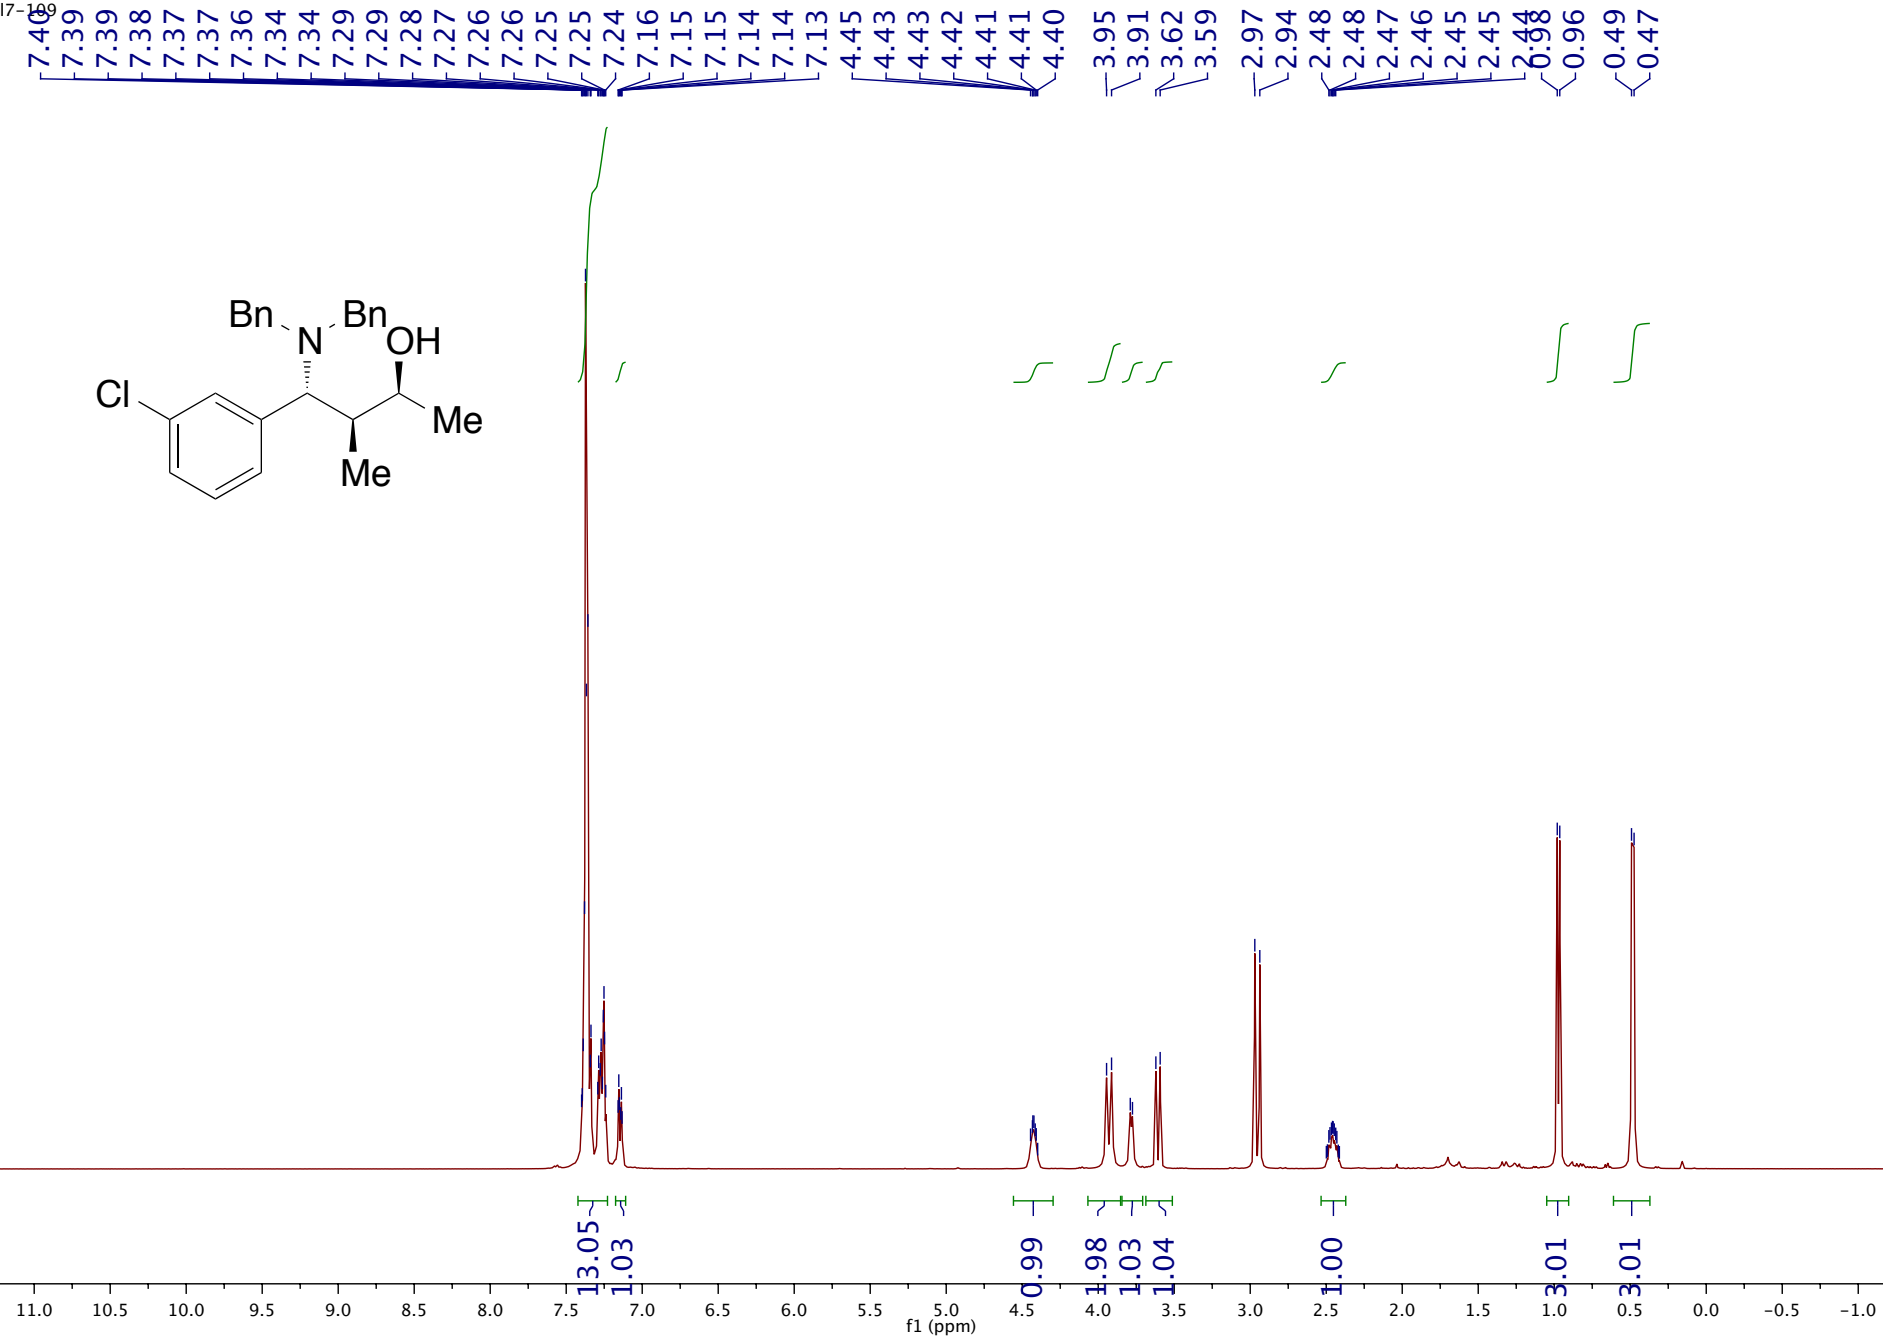

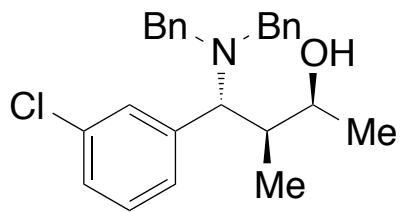

- 138.85
- 137.32
- 134.30
- 130.18
- 129.42
- 129.40
- 128.84
- 128.42
- 127.76
- 127.64
- 77.48 CDCl<sub>3</sub>
- 77.16 CDCl<sub>3</sub>
- 76.84 CDCl<sub>3</sub>
- 68.34
- 64.49
- 53.92
- 37.70
- 18.68
- 12.83

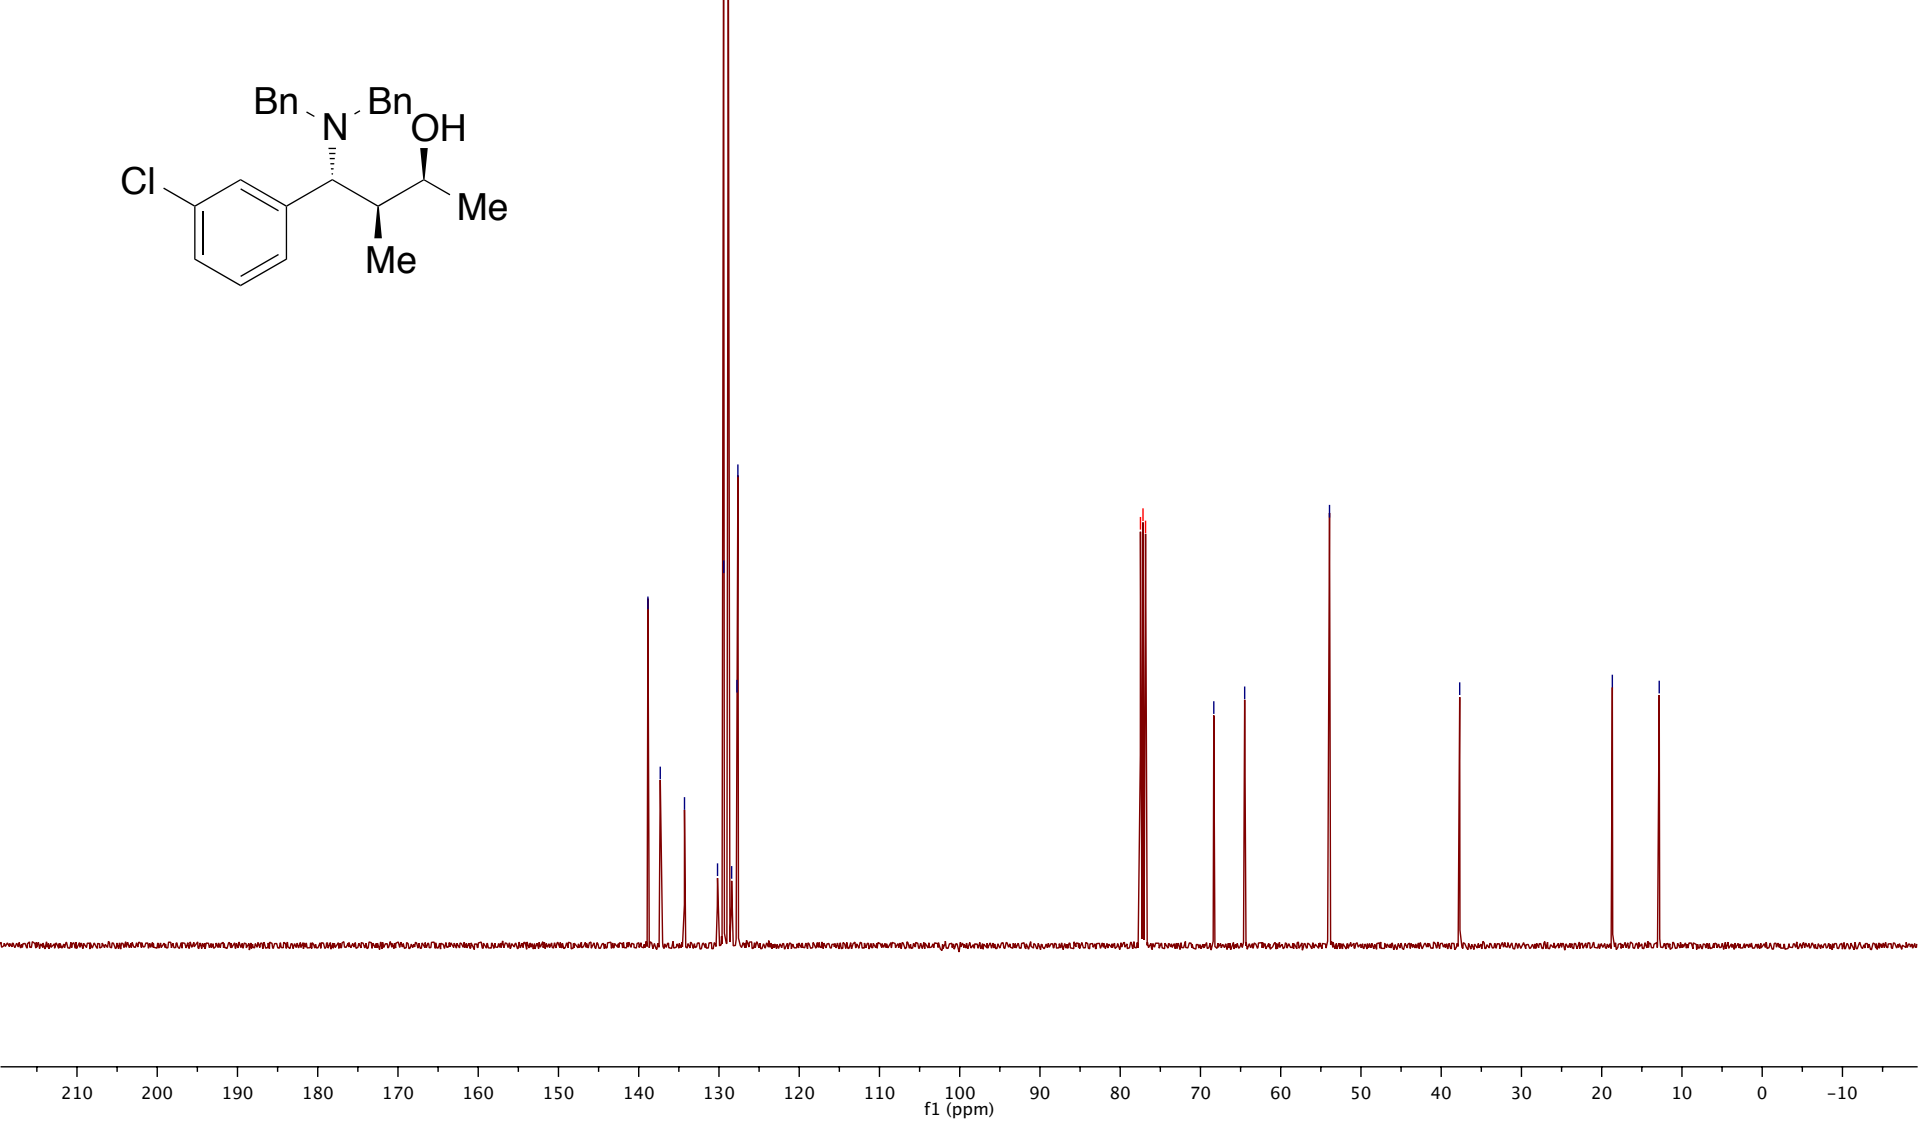

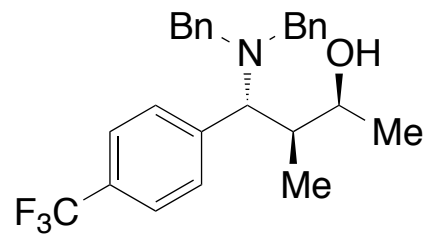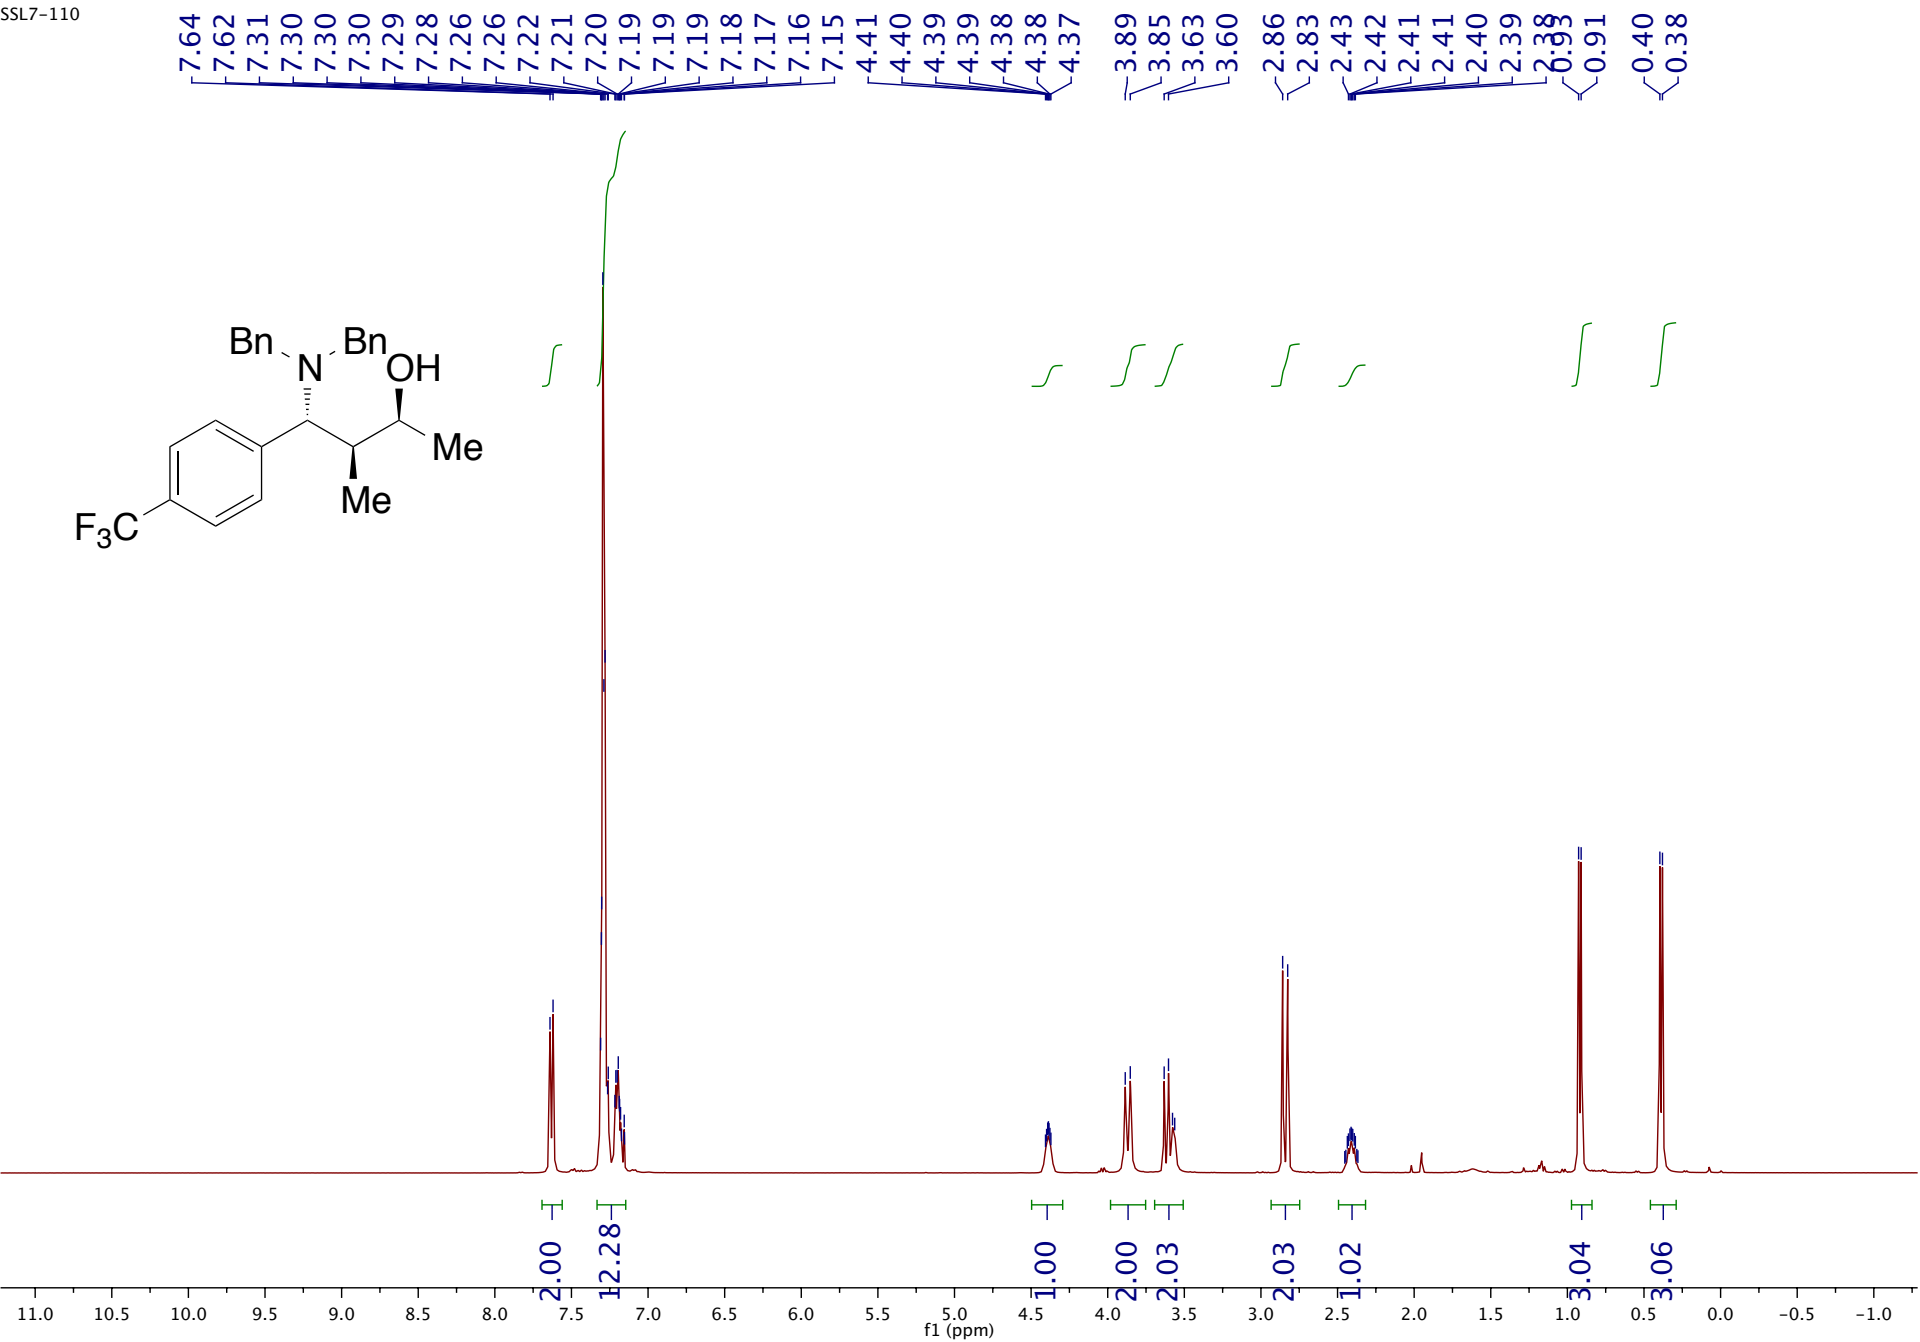

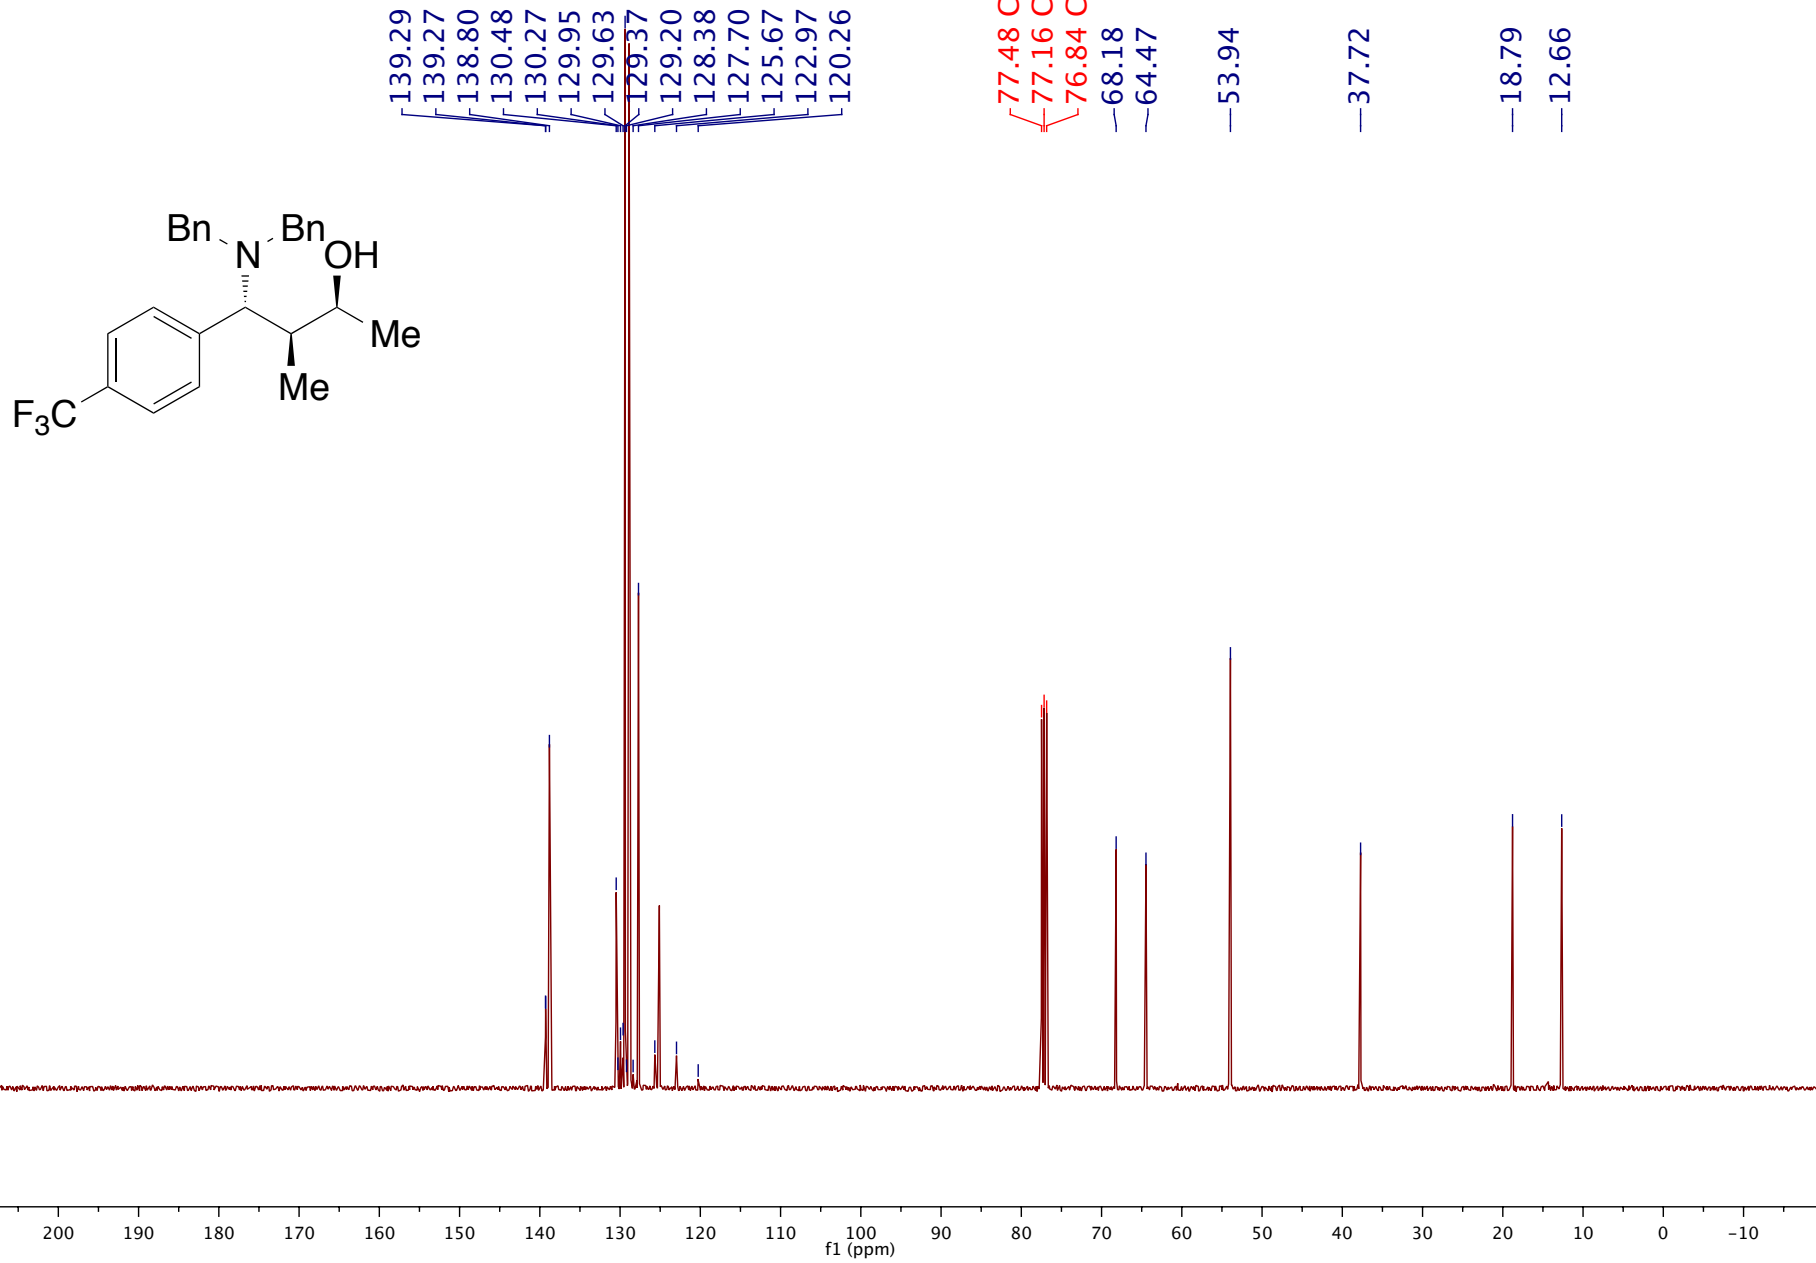

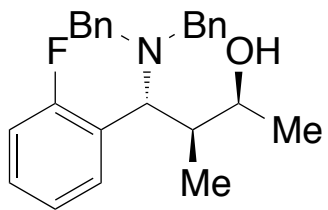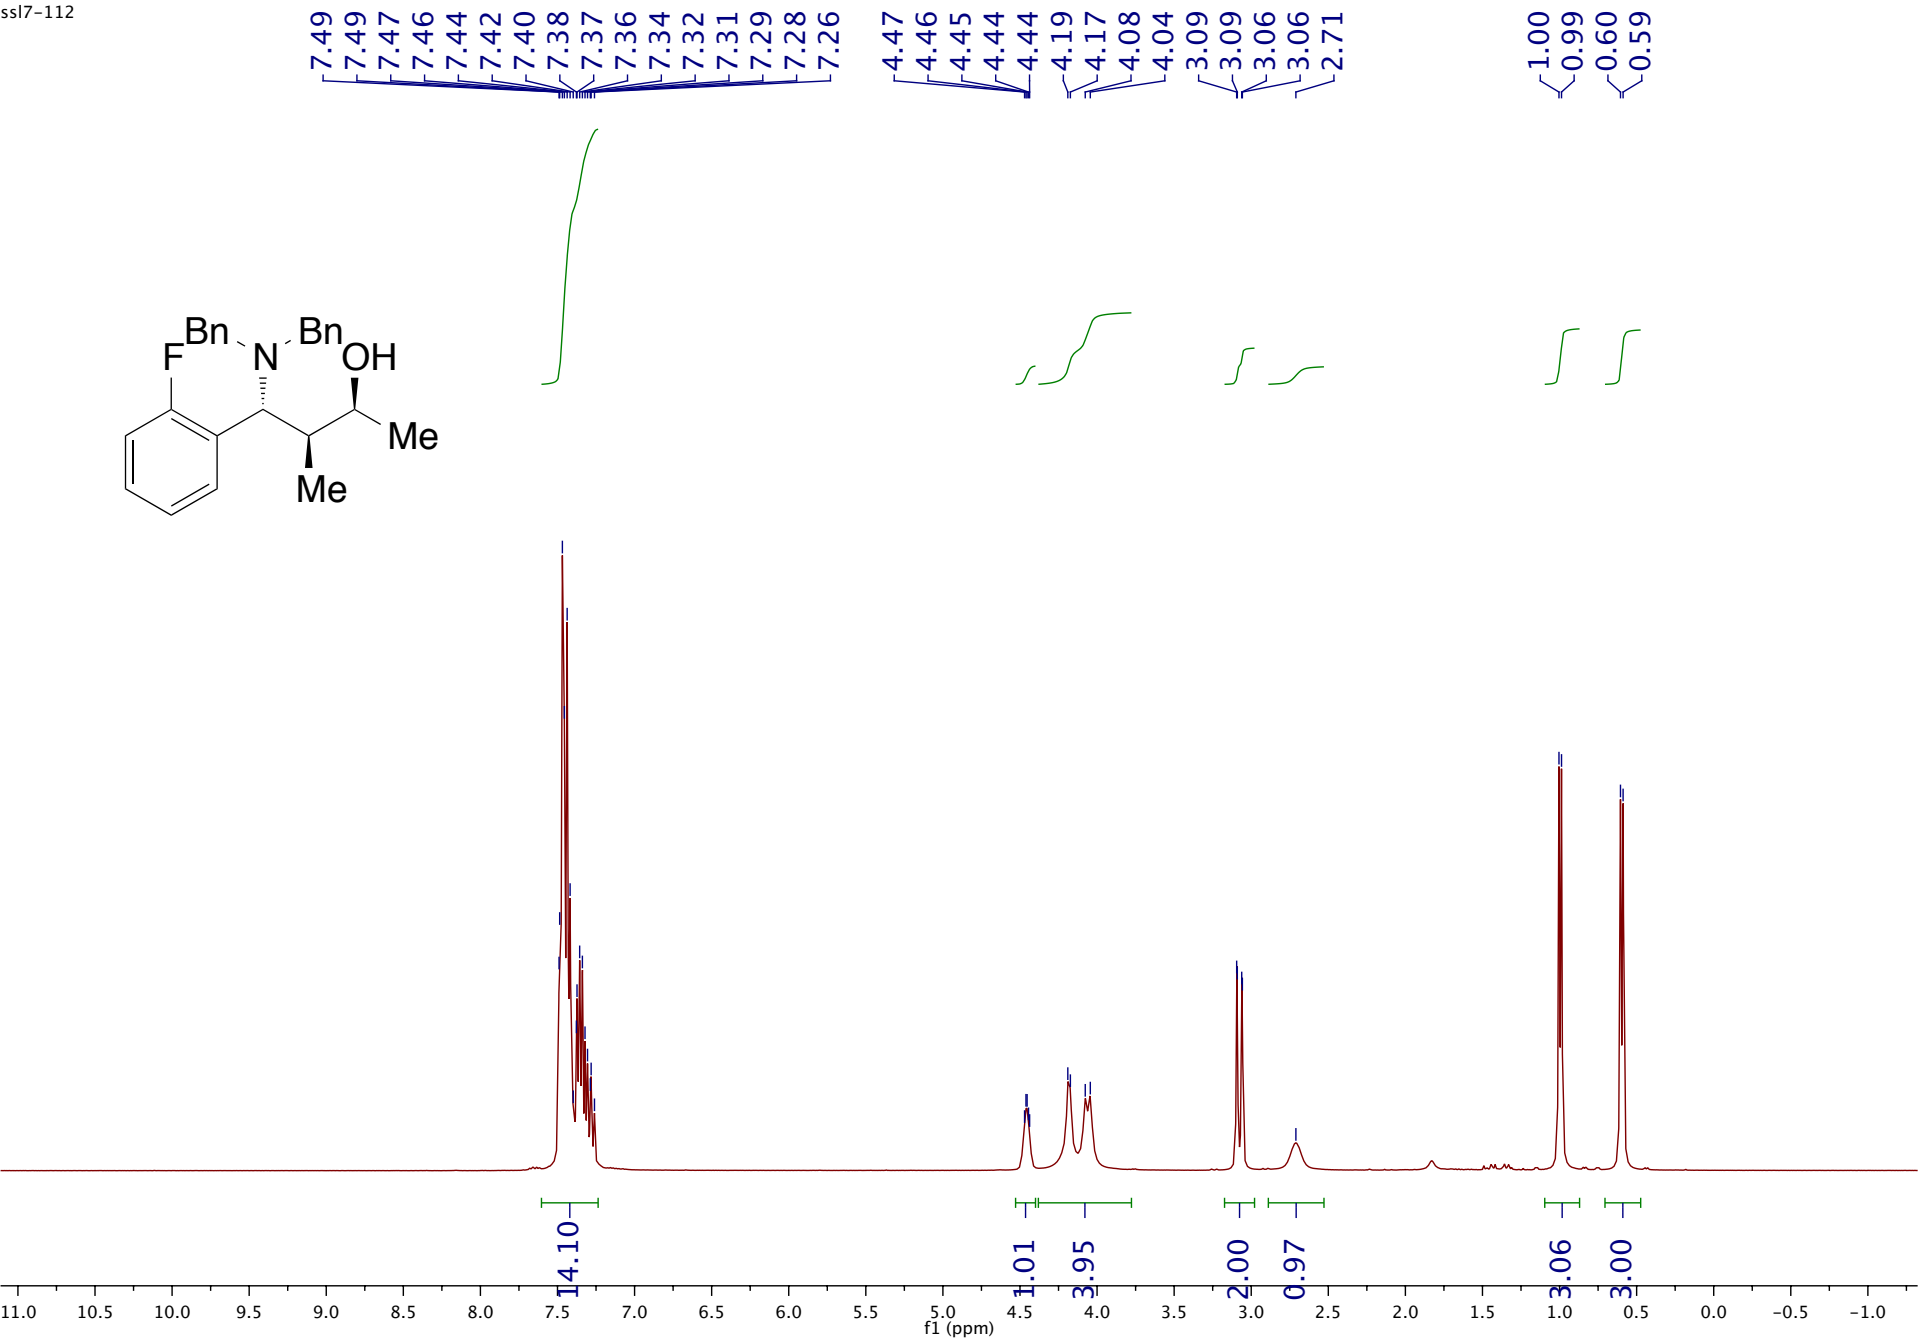



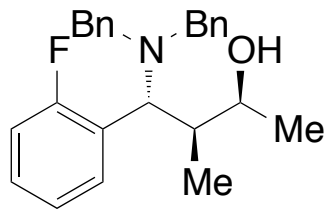

~163.22  
~160.79

—139.12  
—129.65  
—129.31  
—129.23  
—128.65  
—127.54  
—123.74  
—123.70  
—122.61  
—122.45  
—116.26  
—116.01

77.48 CDCI3  
77.16 CDCI3  
76.84 CDCI3  
69.10

—54.20

—37.47

—18.32  
—13.06

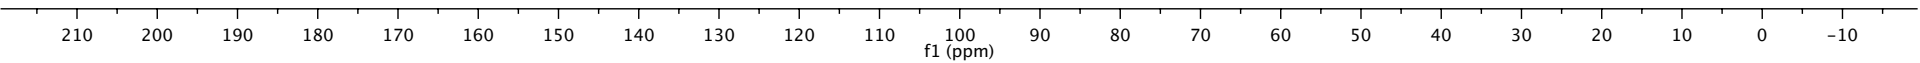

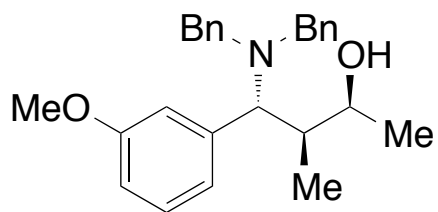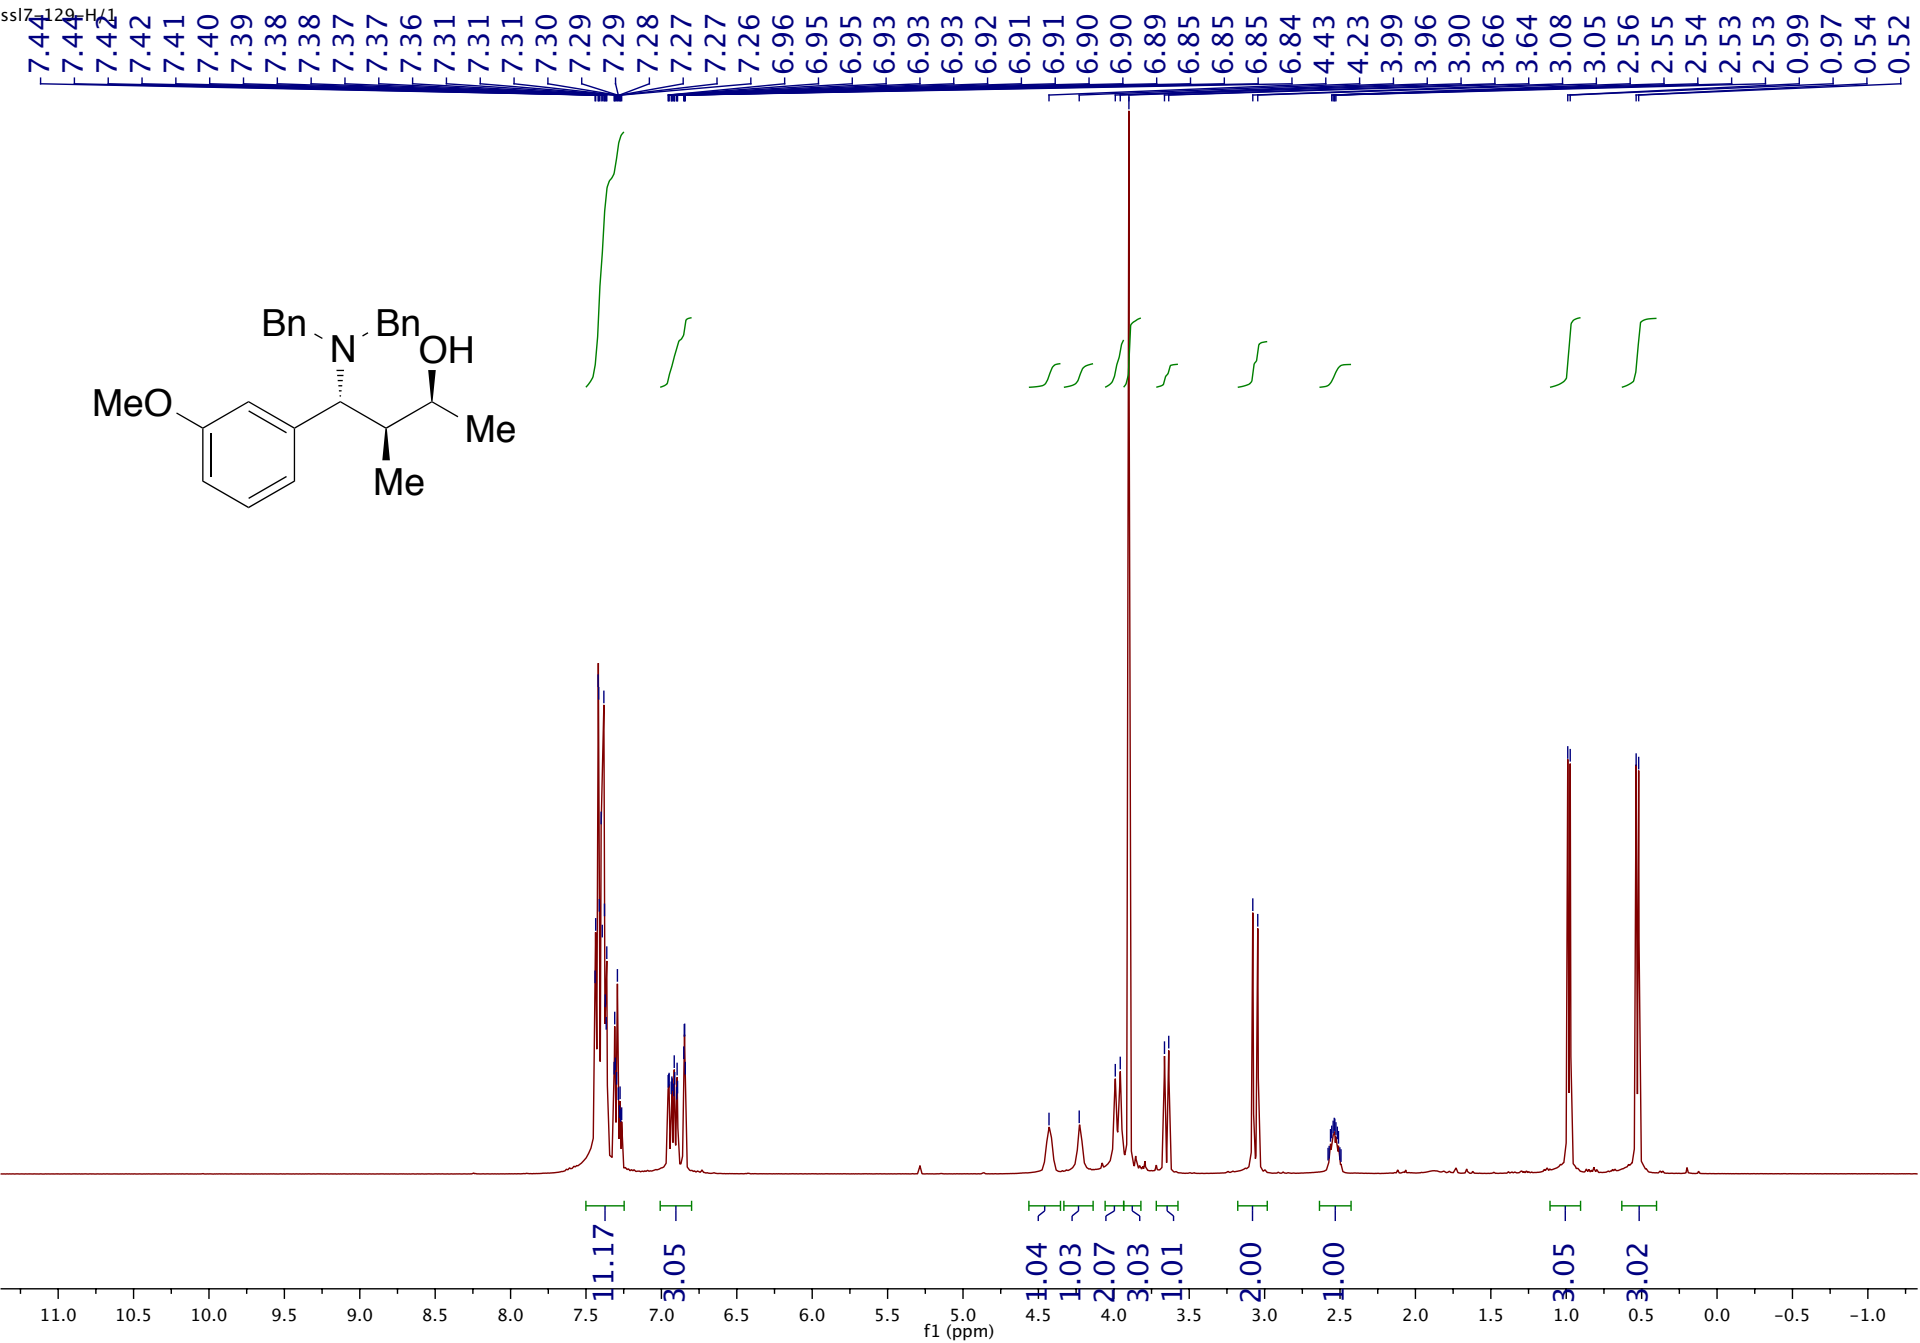

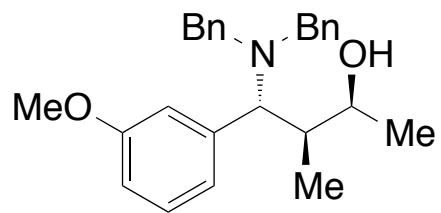

—159.42

139.11  
136.63  
129.47  
128.97  
128.72  
127.49  
122.76  
116.78  
112.12

77.48 CDCI3  
77.16 CDCI3  
76.84 CDCI3  
68.79  
64.76

55.31  
53.96

—37.59

—18.48

—13.10

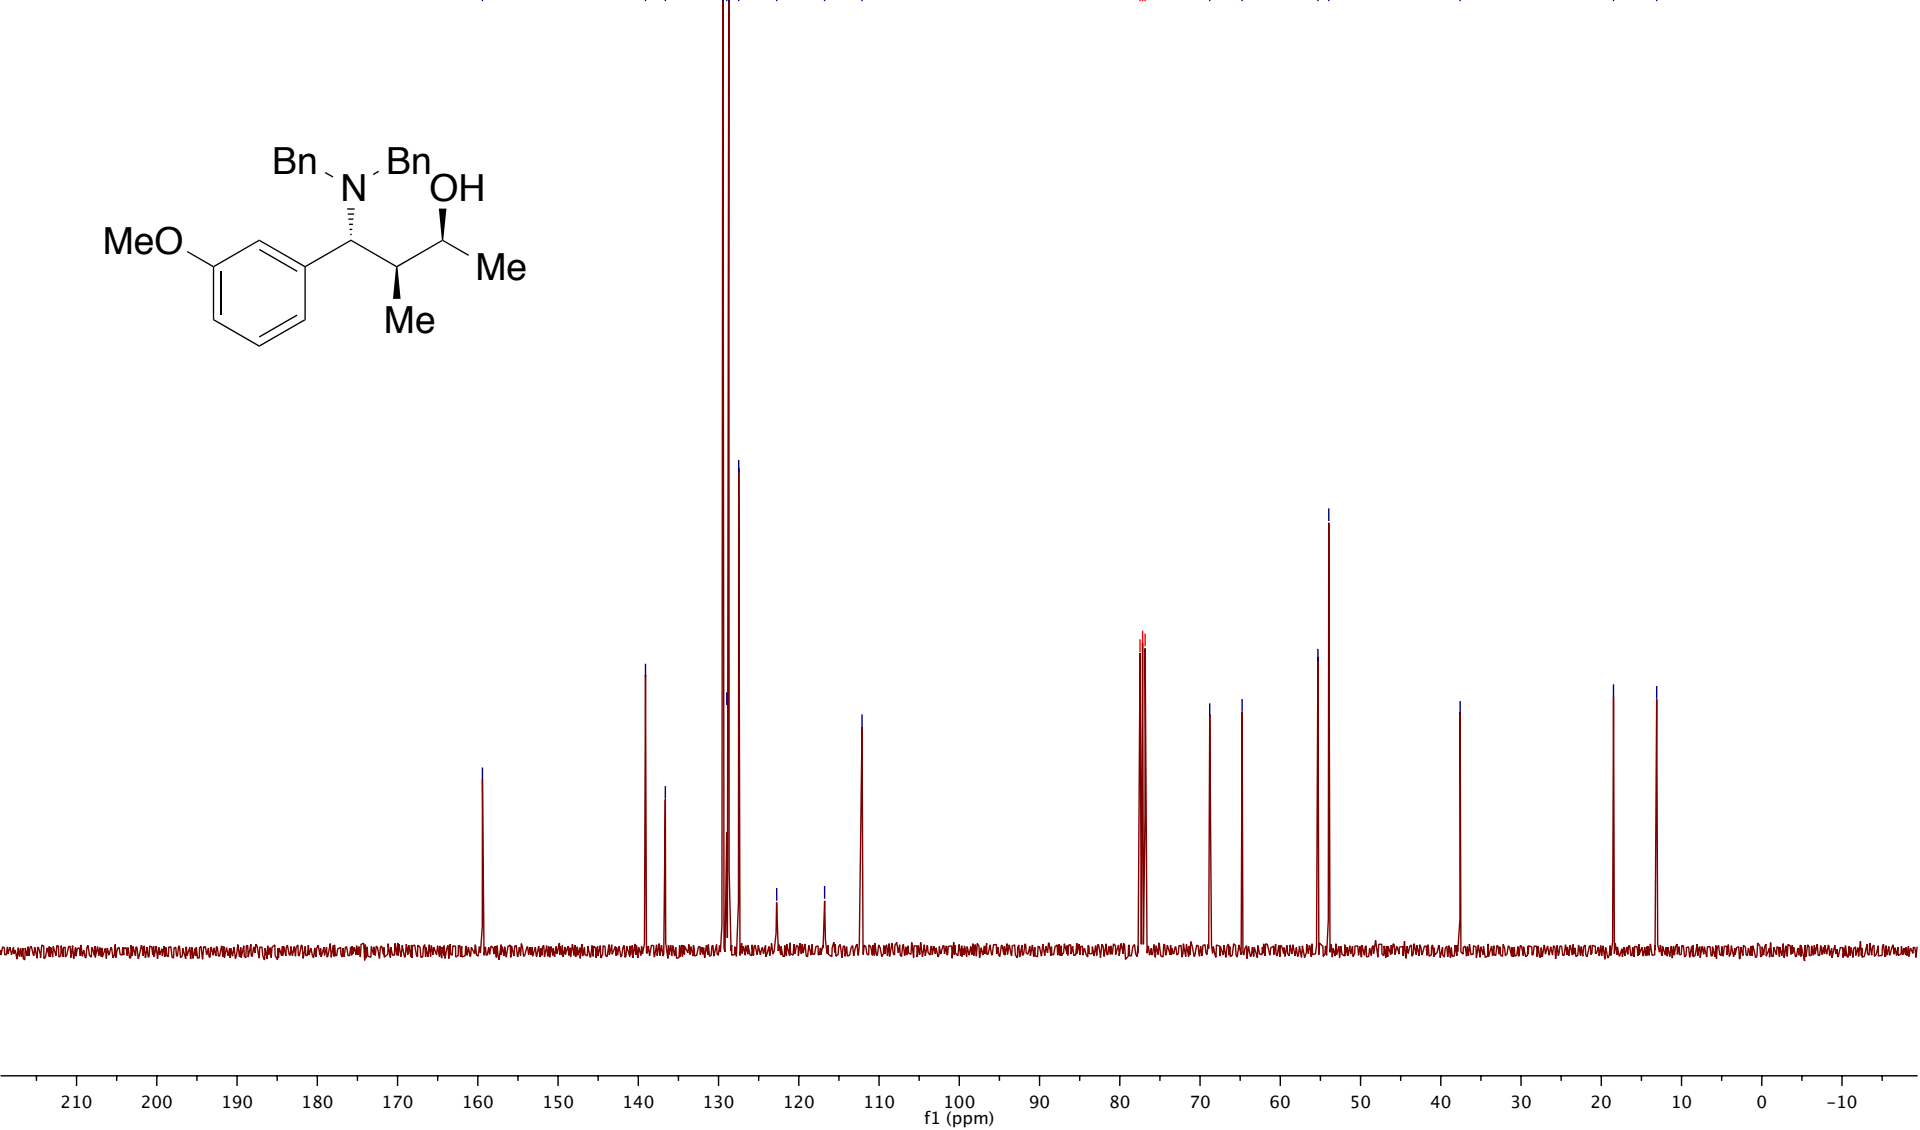

zlw2-34

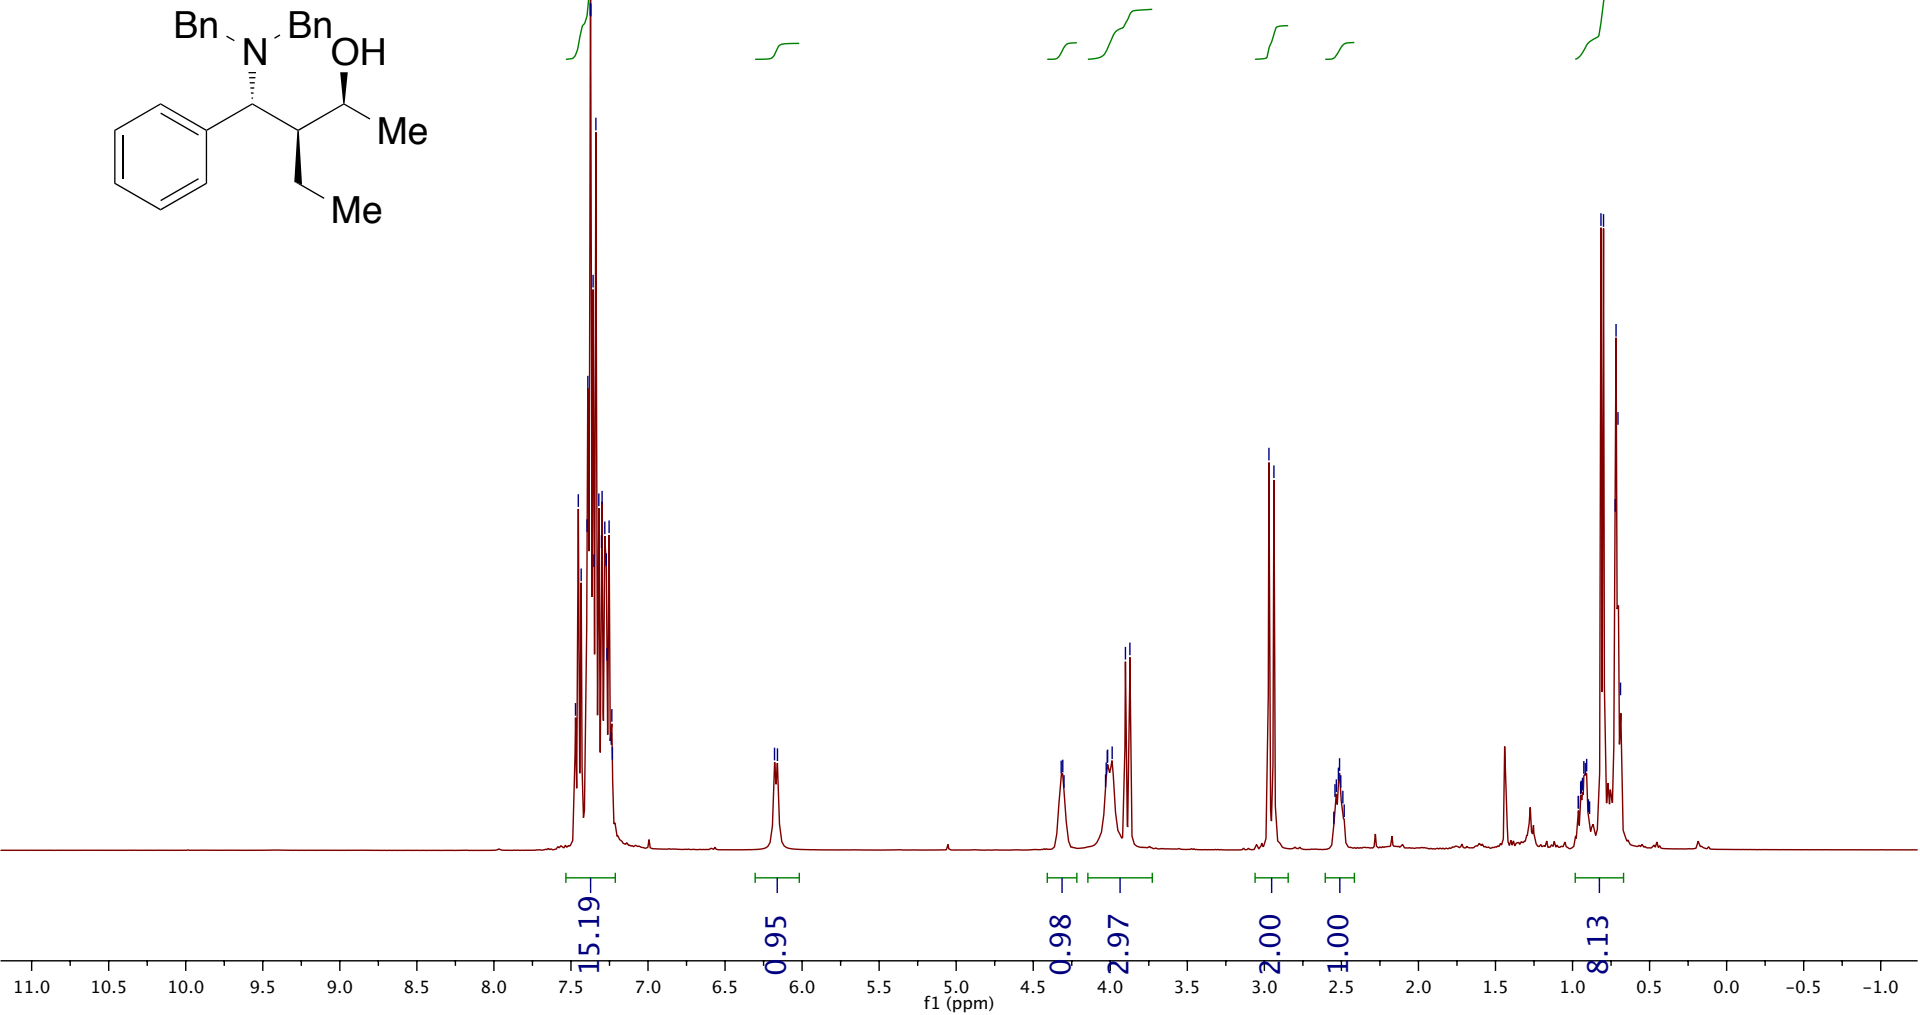

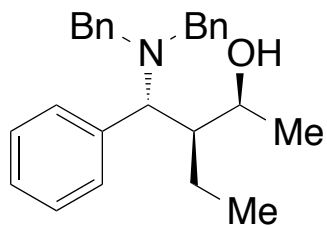

138.43  
133.93  
130.50  
129.78  
128.59  
128.01  
127.57  
127.46

77.48 CDCl<sub>3</sub>  
77.16 CDCl<sub>3</sub>  
76.84 CDCl<sub>3</sub>  
68.44  
64.25

53.80

42.61

22.01  
17.24  
12.37

210 200 190 180 170 160 150 140 130 120 110 100 90 80 70 60 50 40 30 20 10 0 -10  
f1 (ppm)

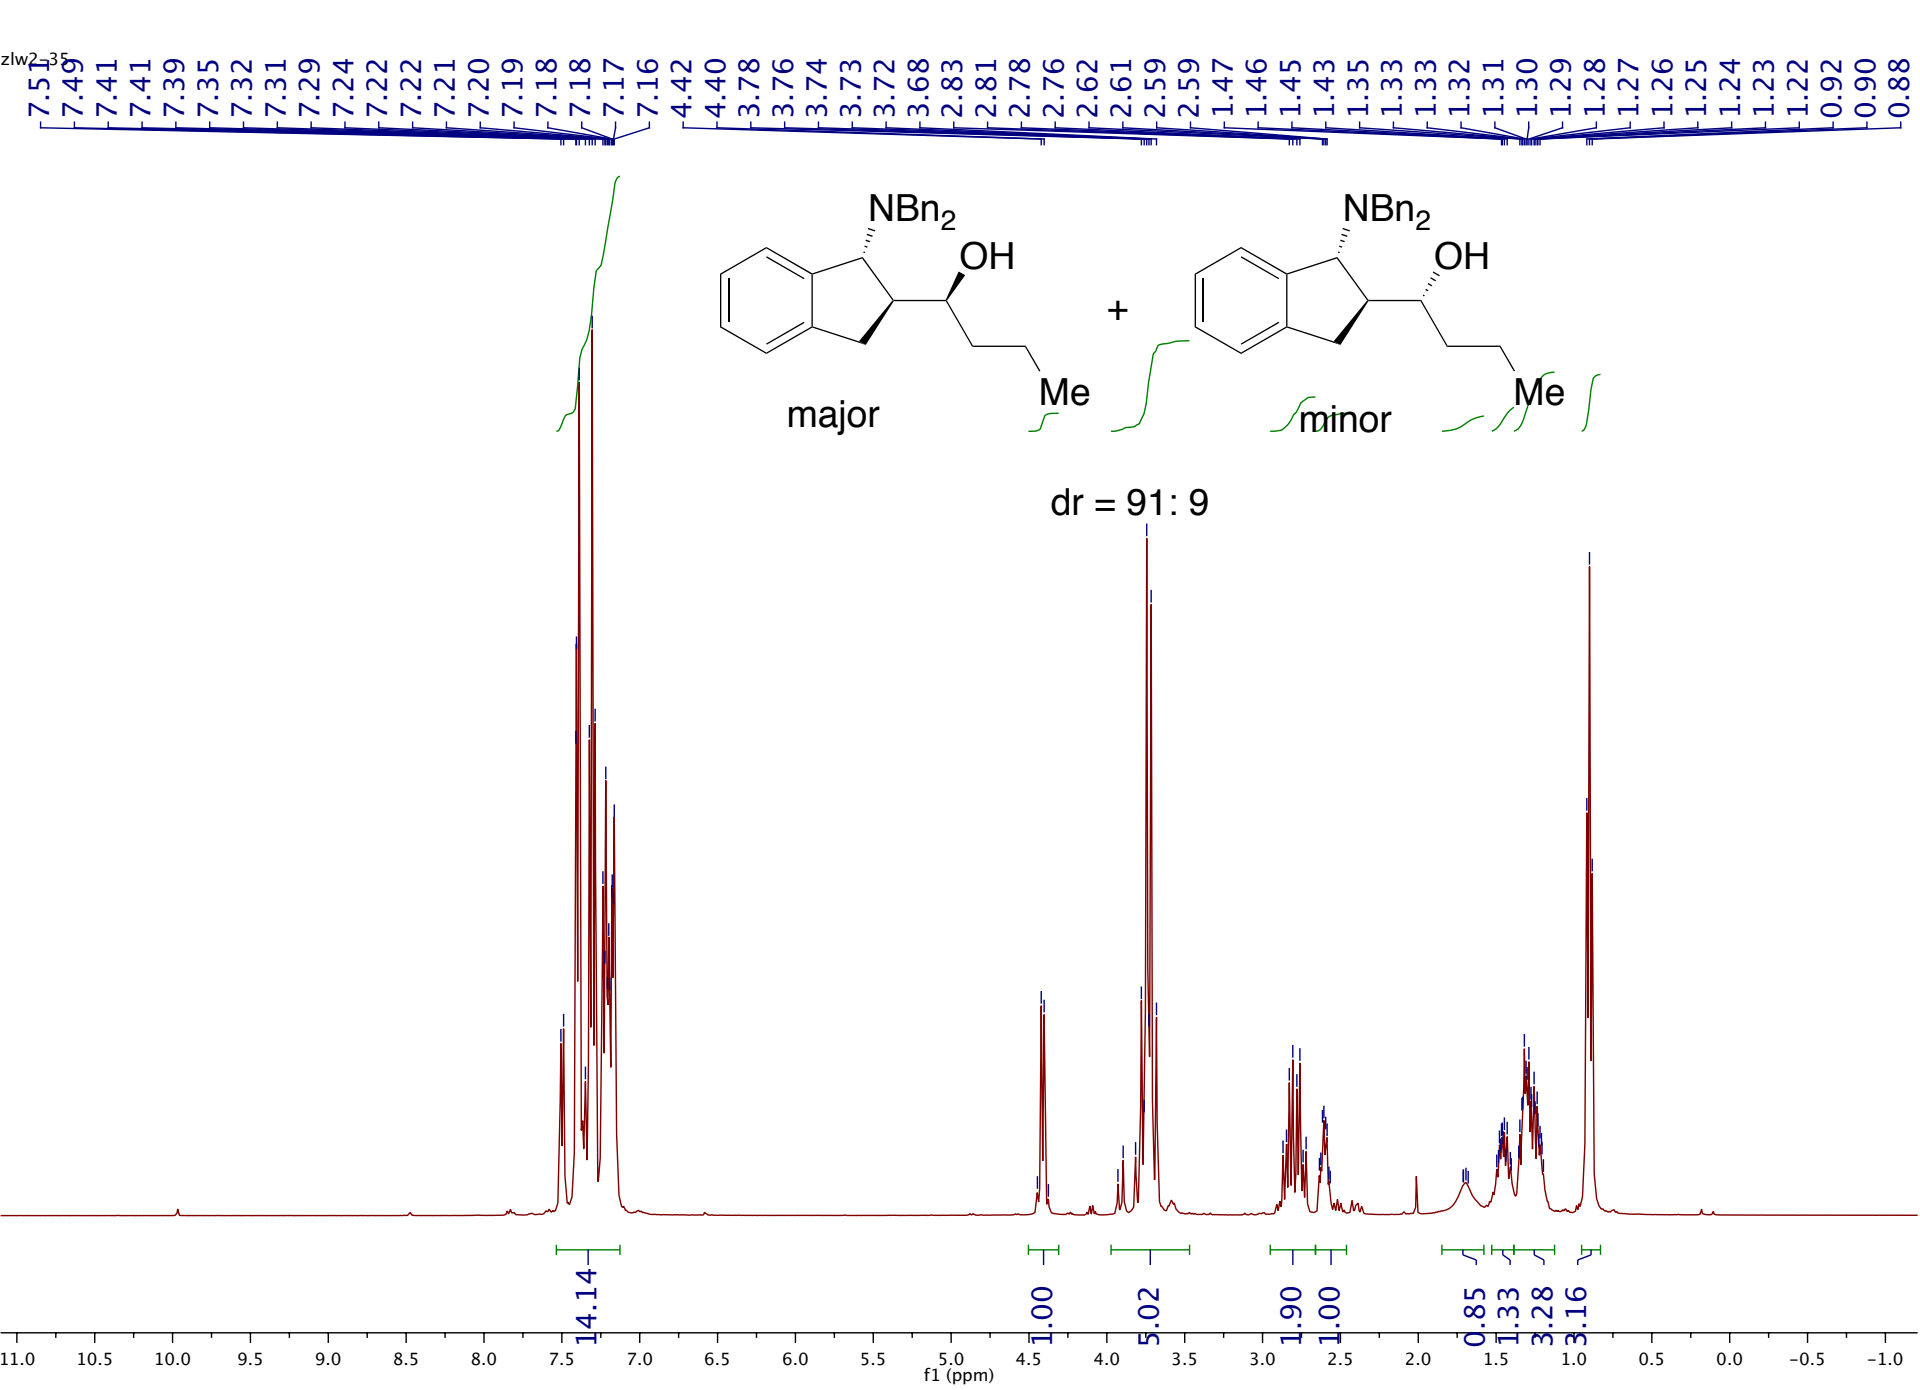

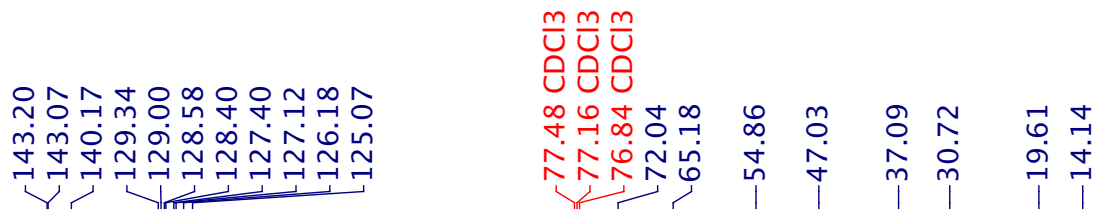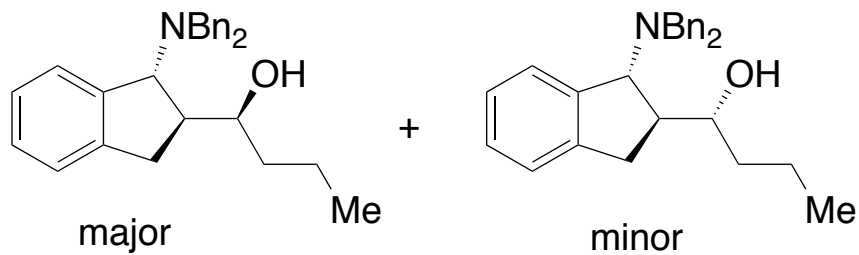

dr = 91:9

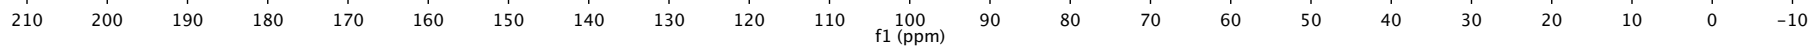

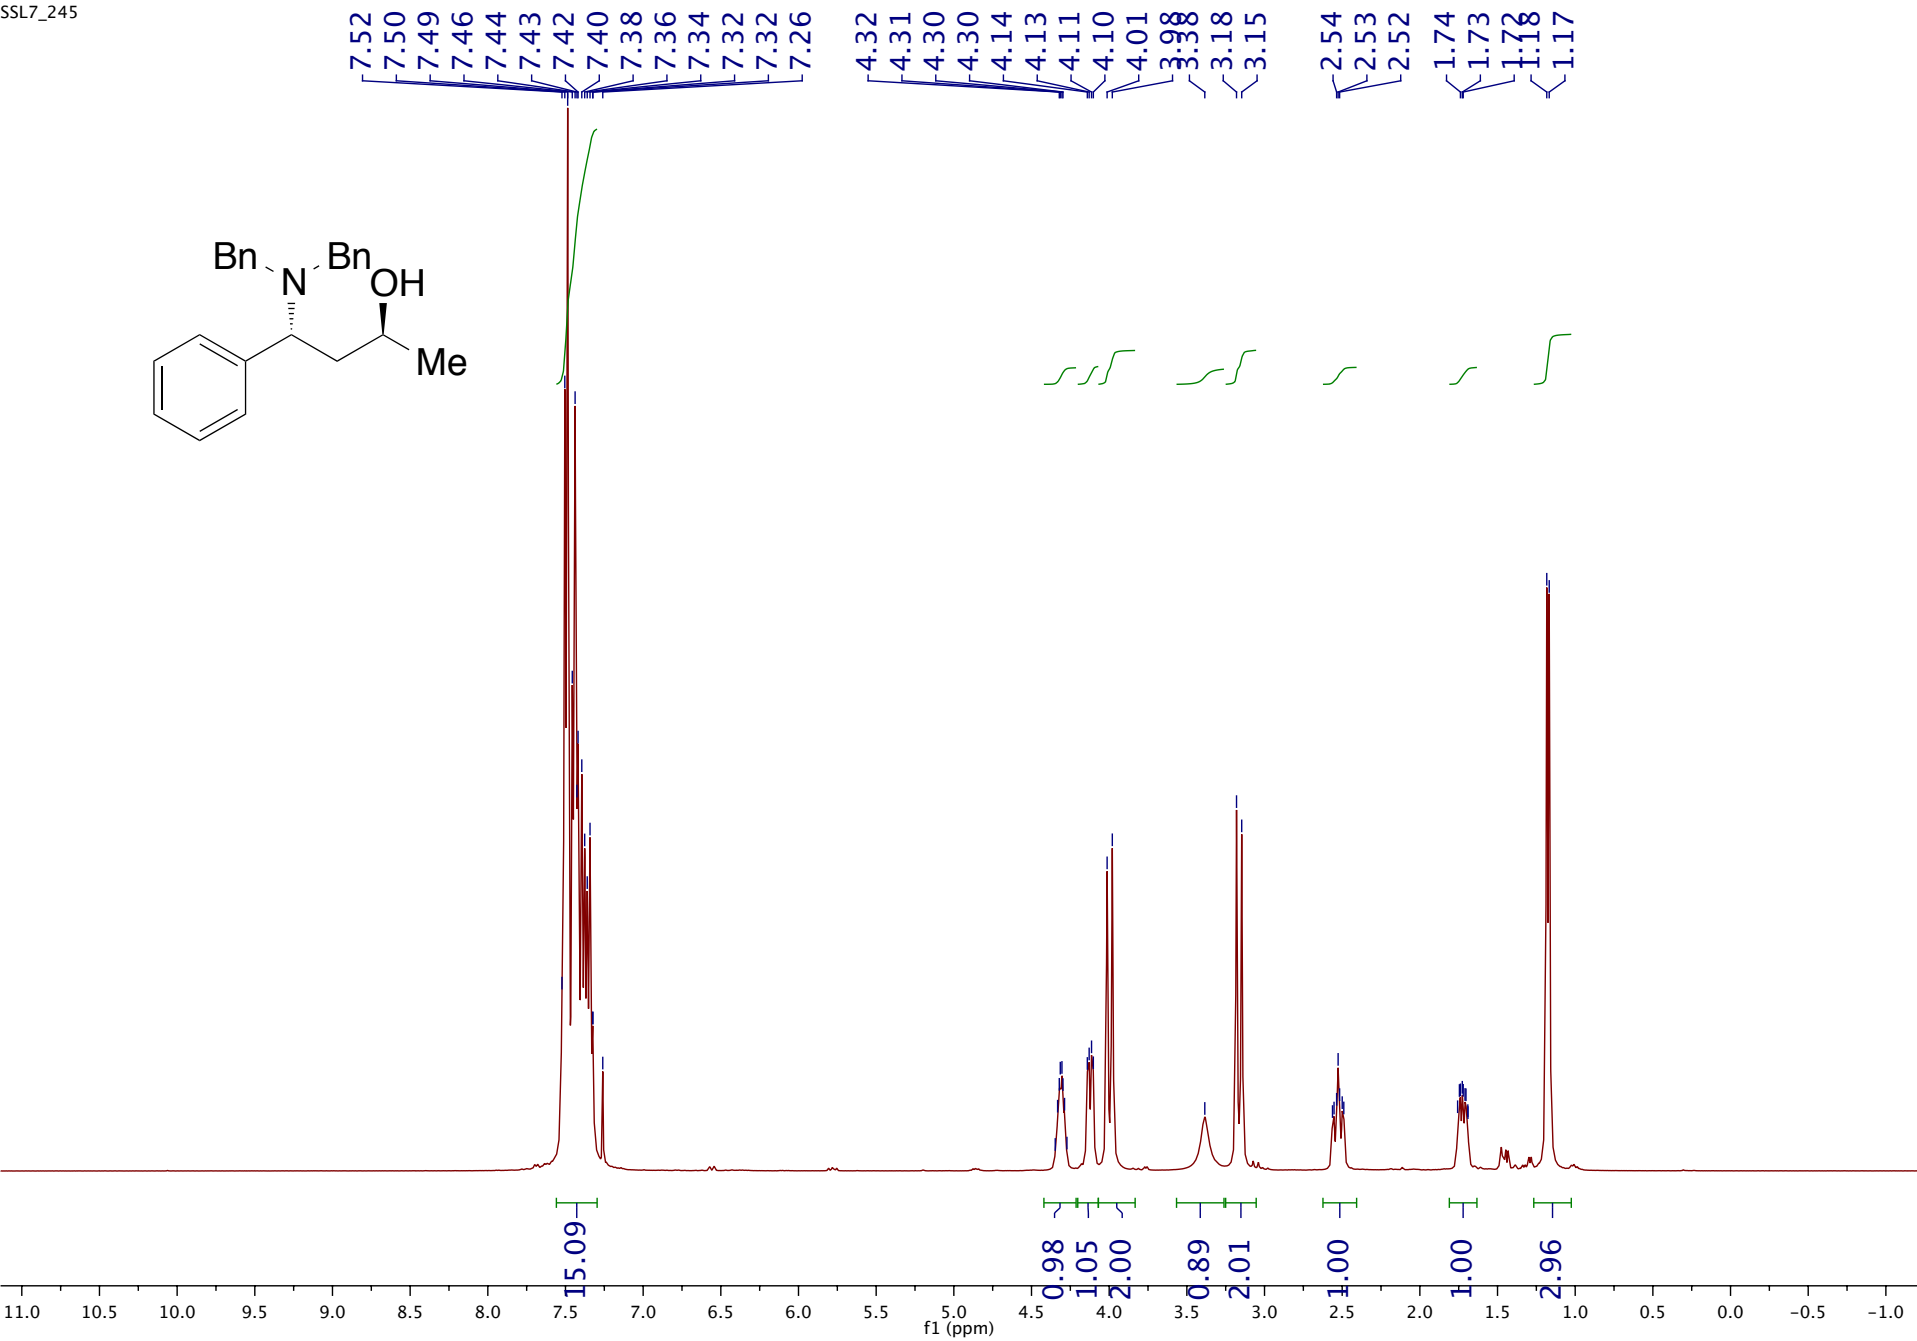



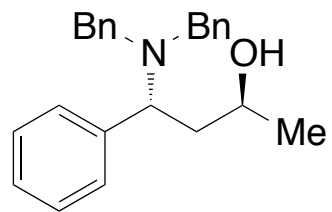

139.48  
137.20  
129.32  
129.12  
128.53  
128.09  
127.46  
127.23  
77.48 CDCl3  
77.16 CDCl3  
76.84 CDCl3  
65.36  
57.98  
53.55  
39.38  
22.72

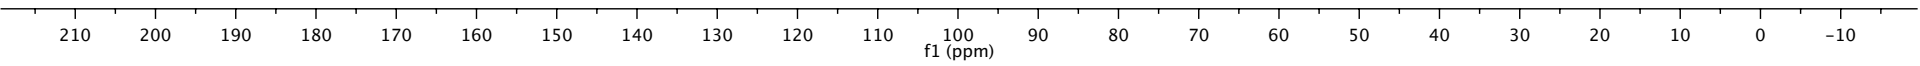

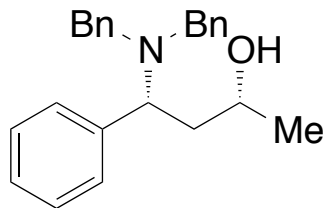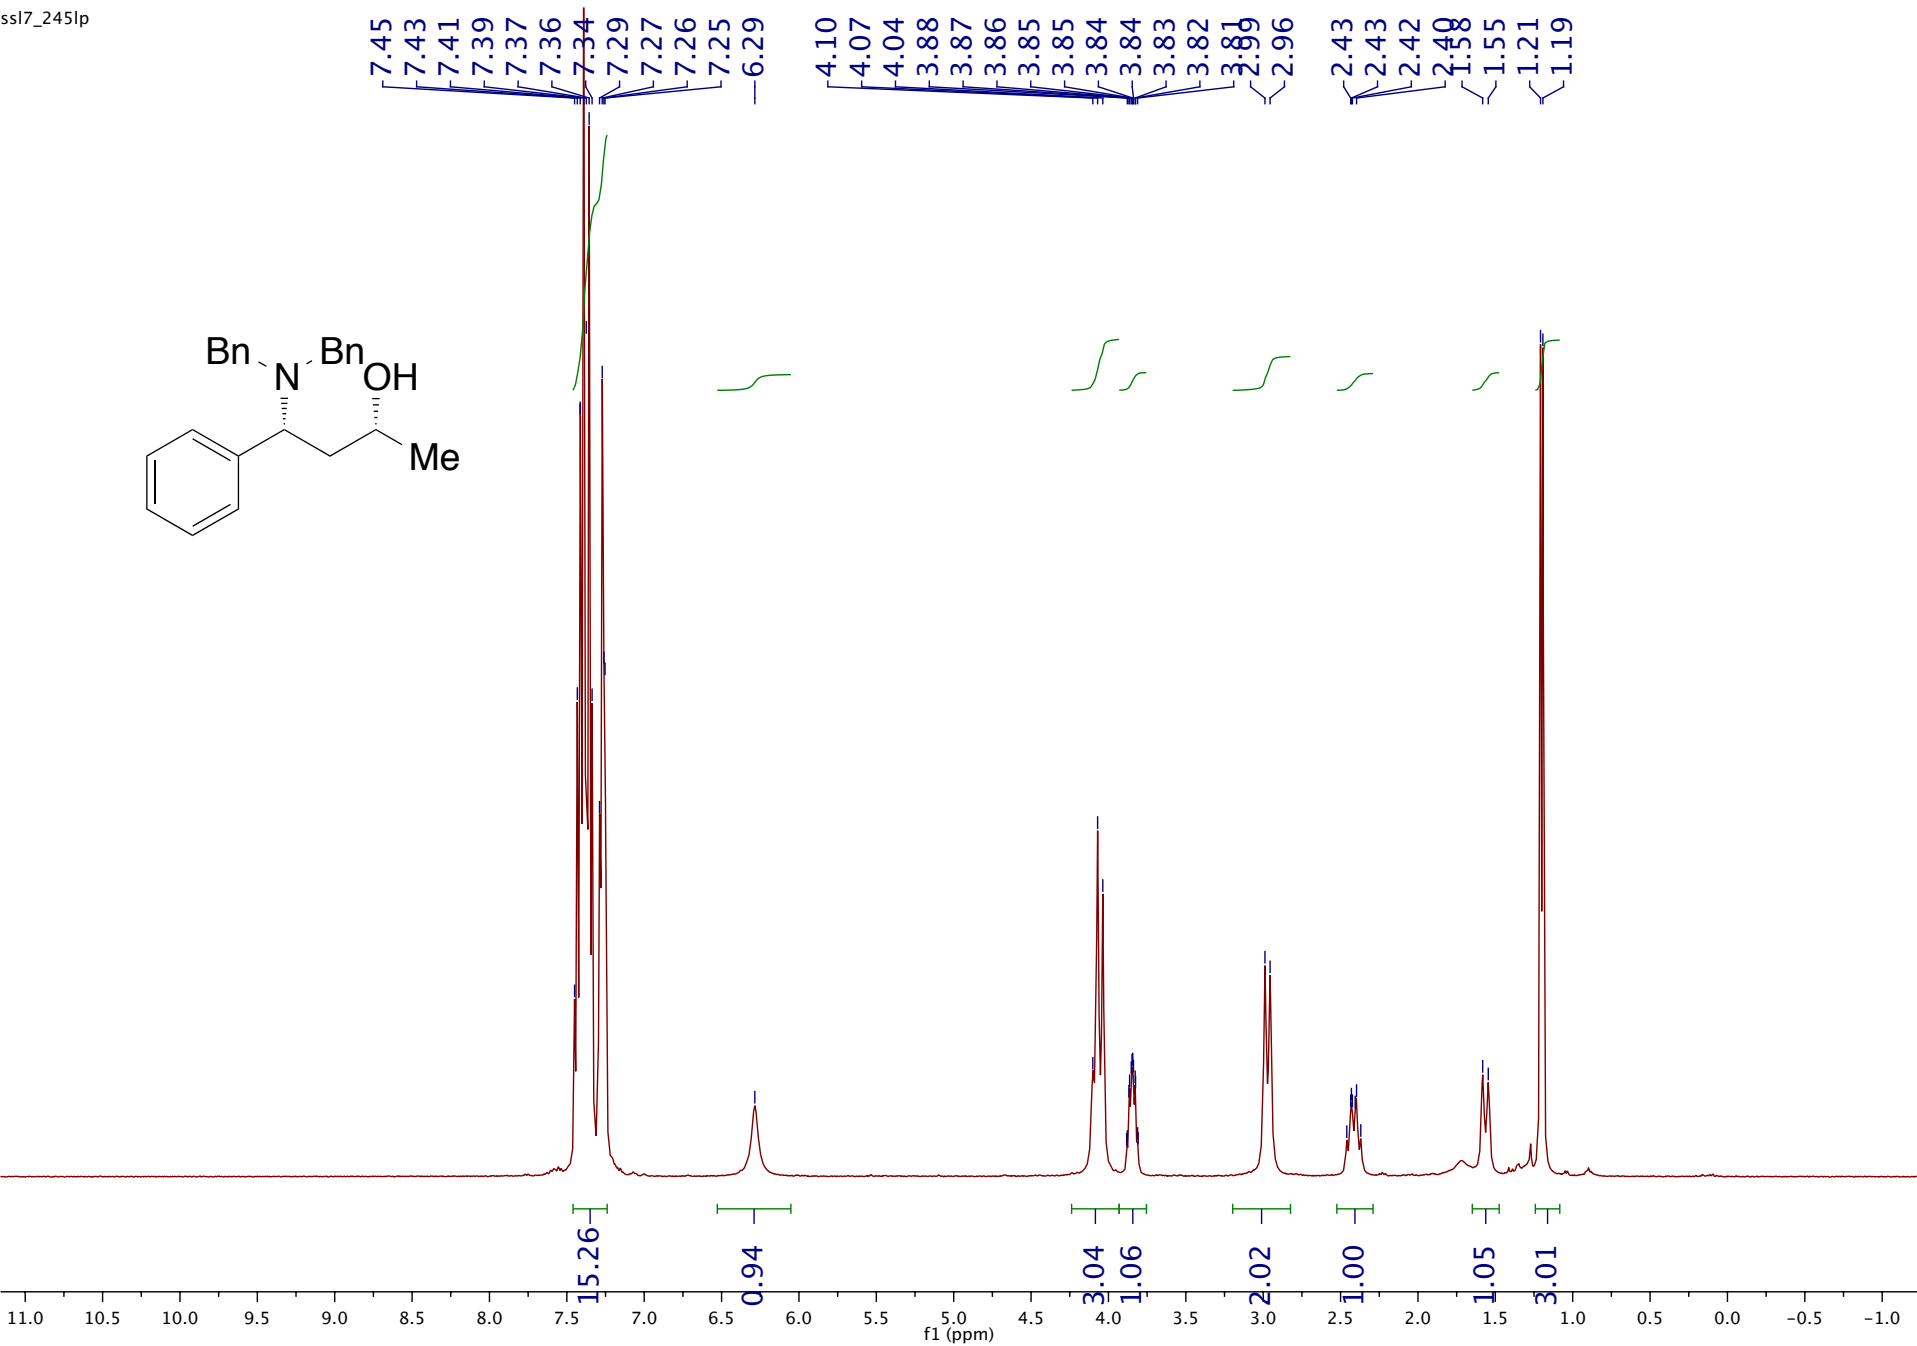

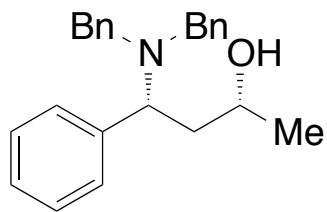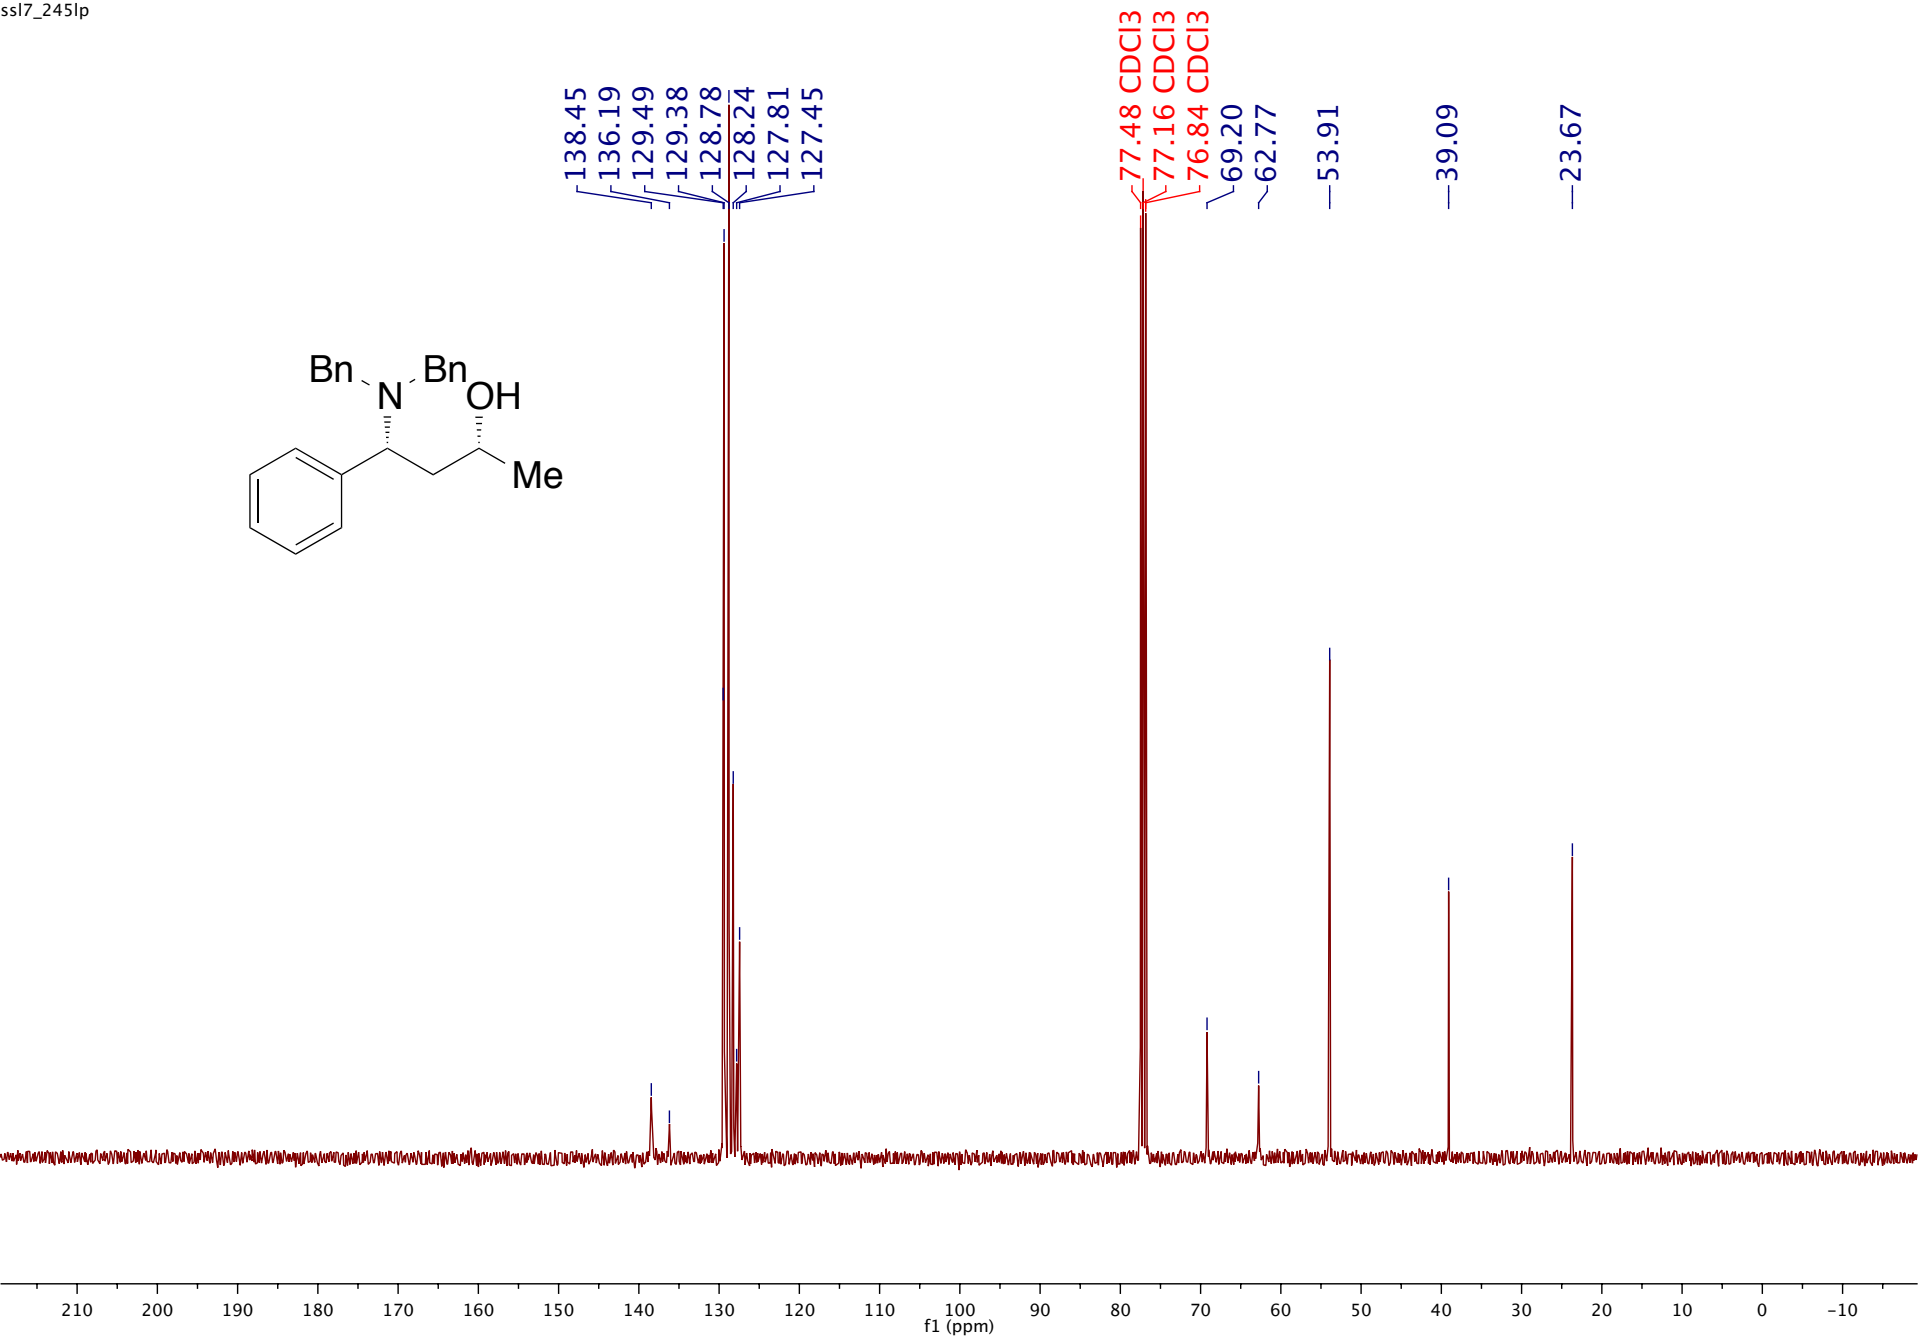

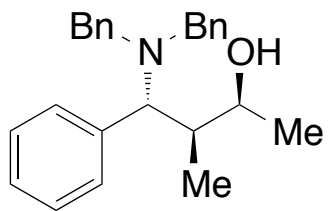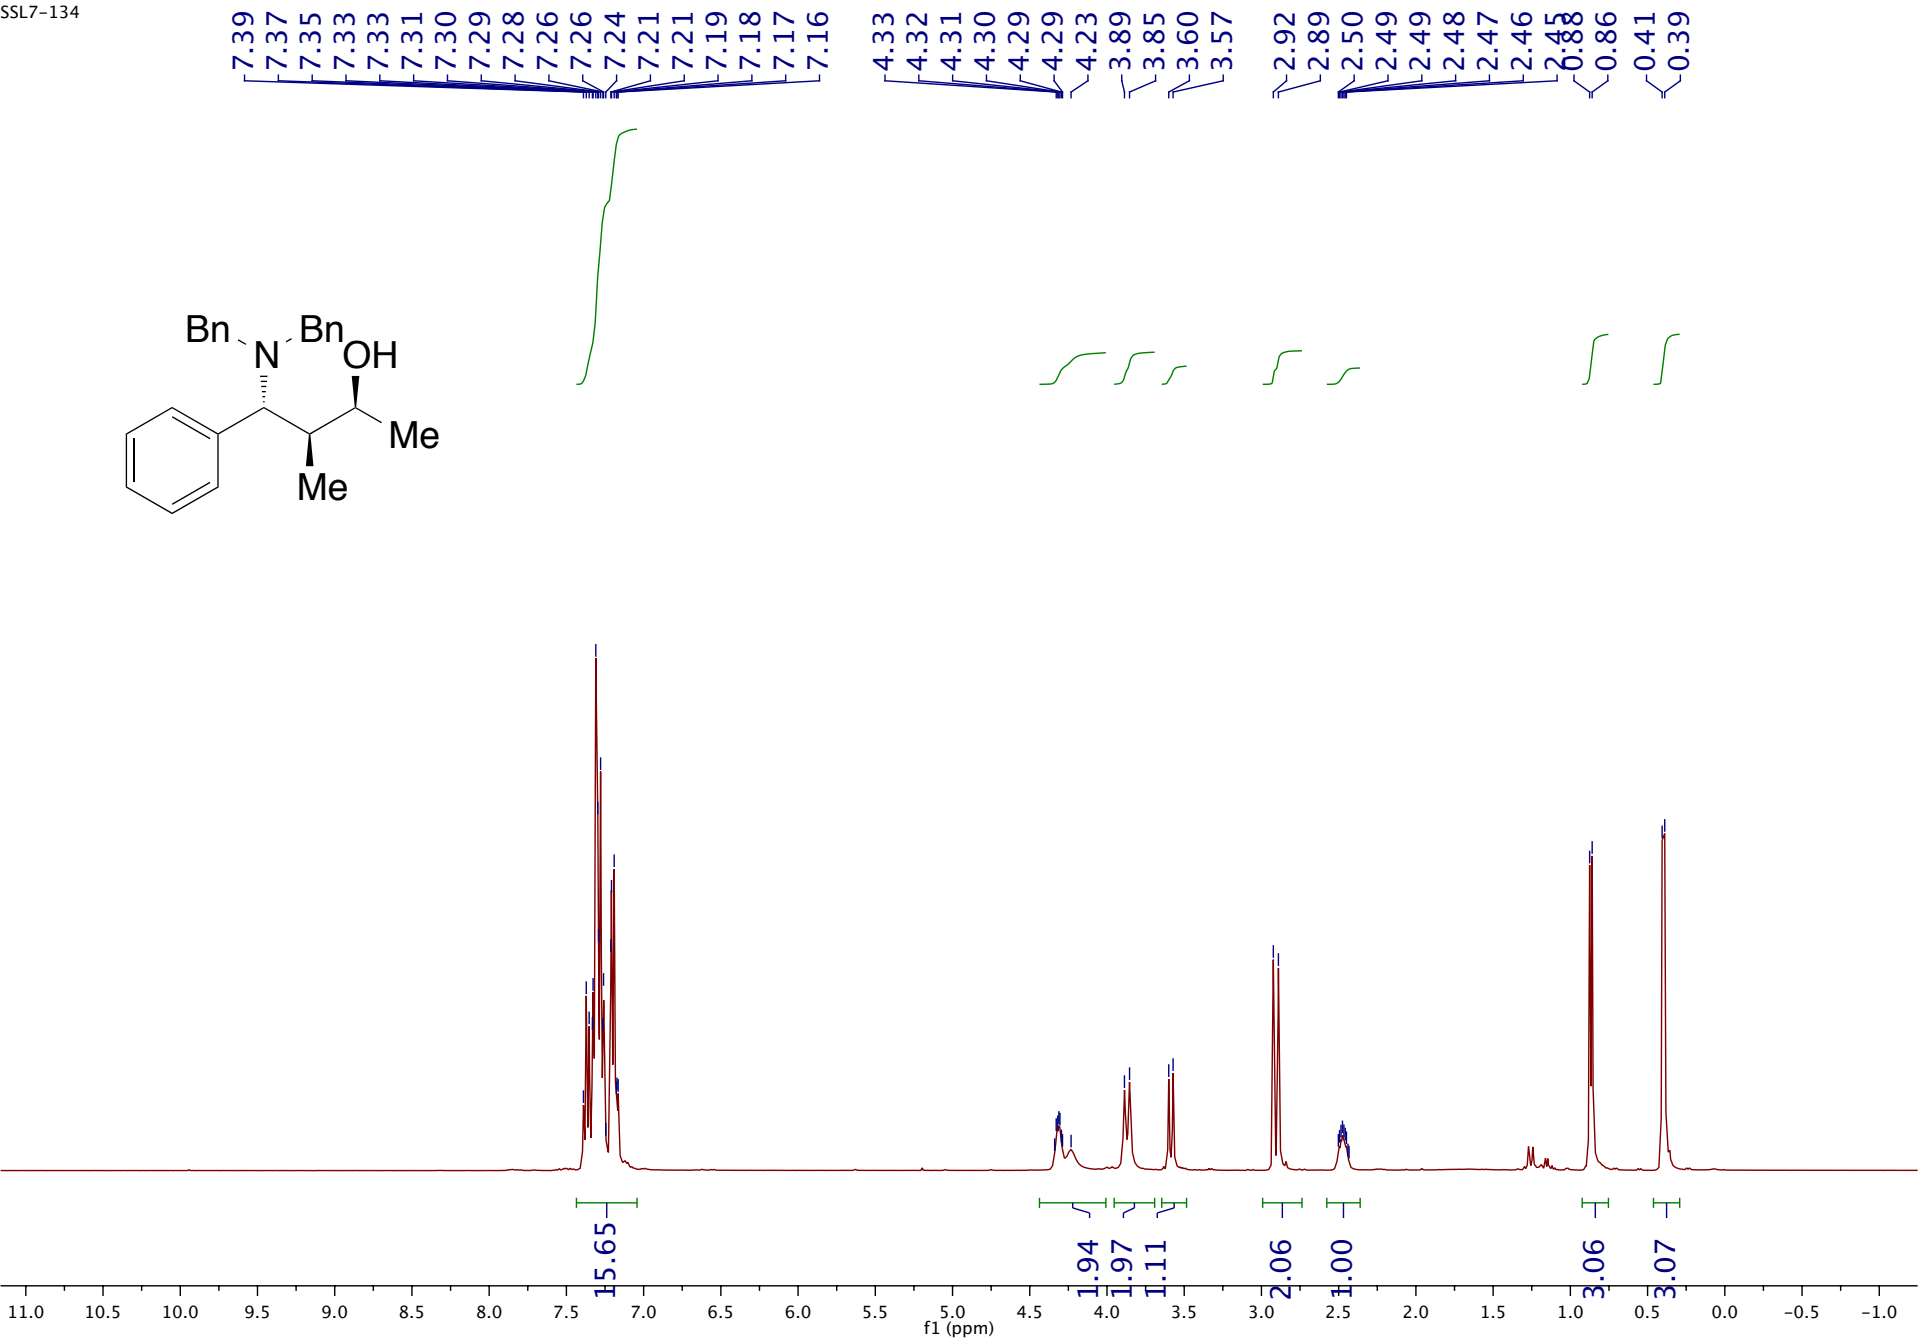



139.09  
134.95  
130.40  
129.54  
128.75  
128.12  
127.57  
127.53

77.48 CDCl<sub>3</sub>  
77.16 CDCl<sub>3</sub>  
76.84 CDCl<sub>3</sub>  
69.00  
64.80

53.94

37.52

18.43

13.31

210 200 190 180 170 160 150 140 130 120 110 100 90 80 70 60 50 40 30 20 10 0 -10

f1 (ppm)

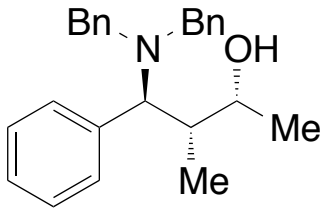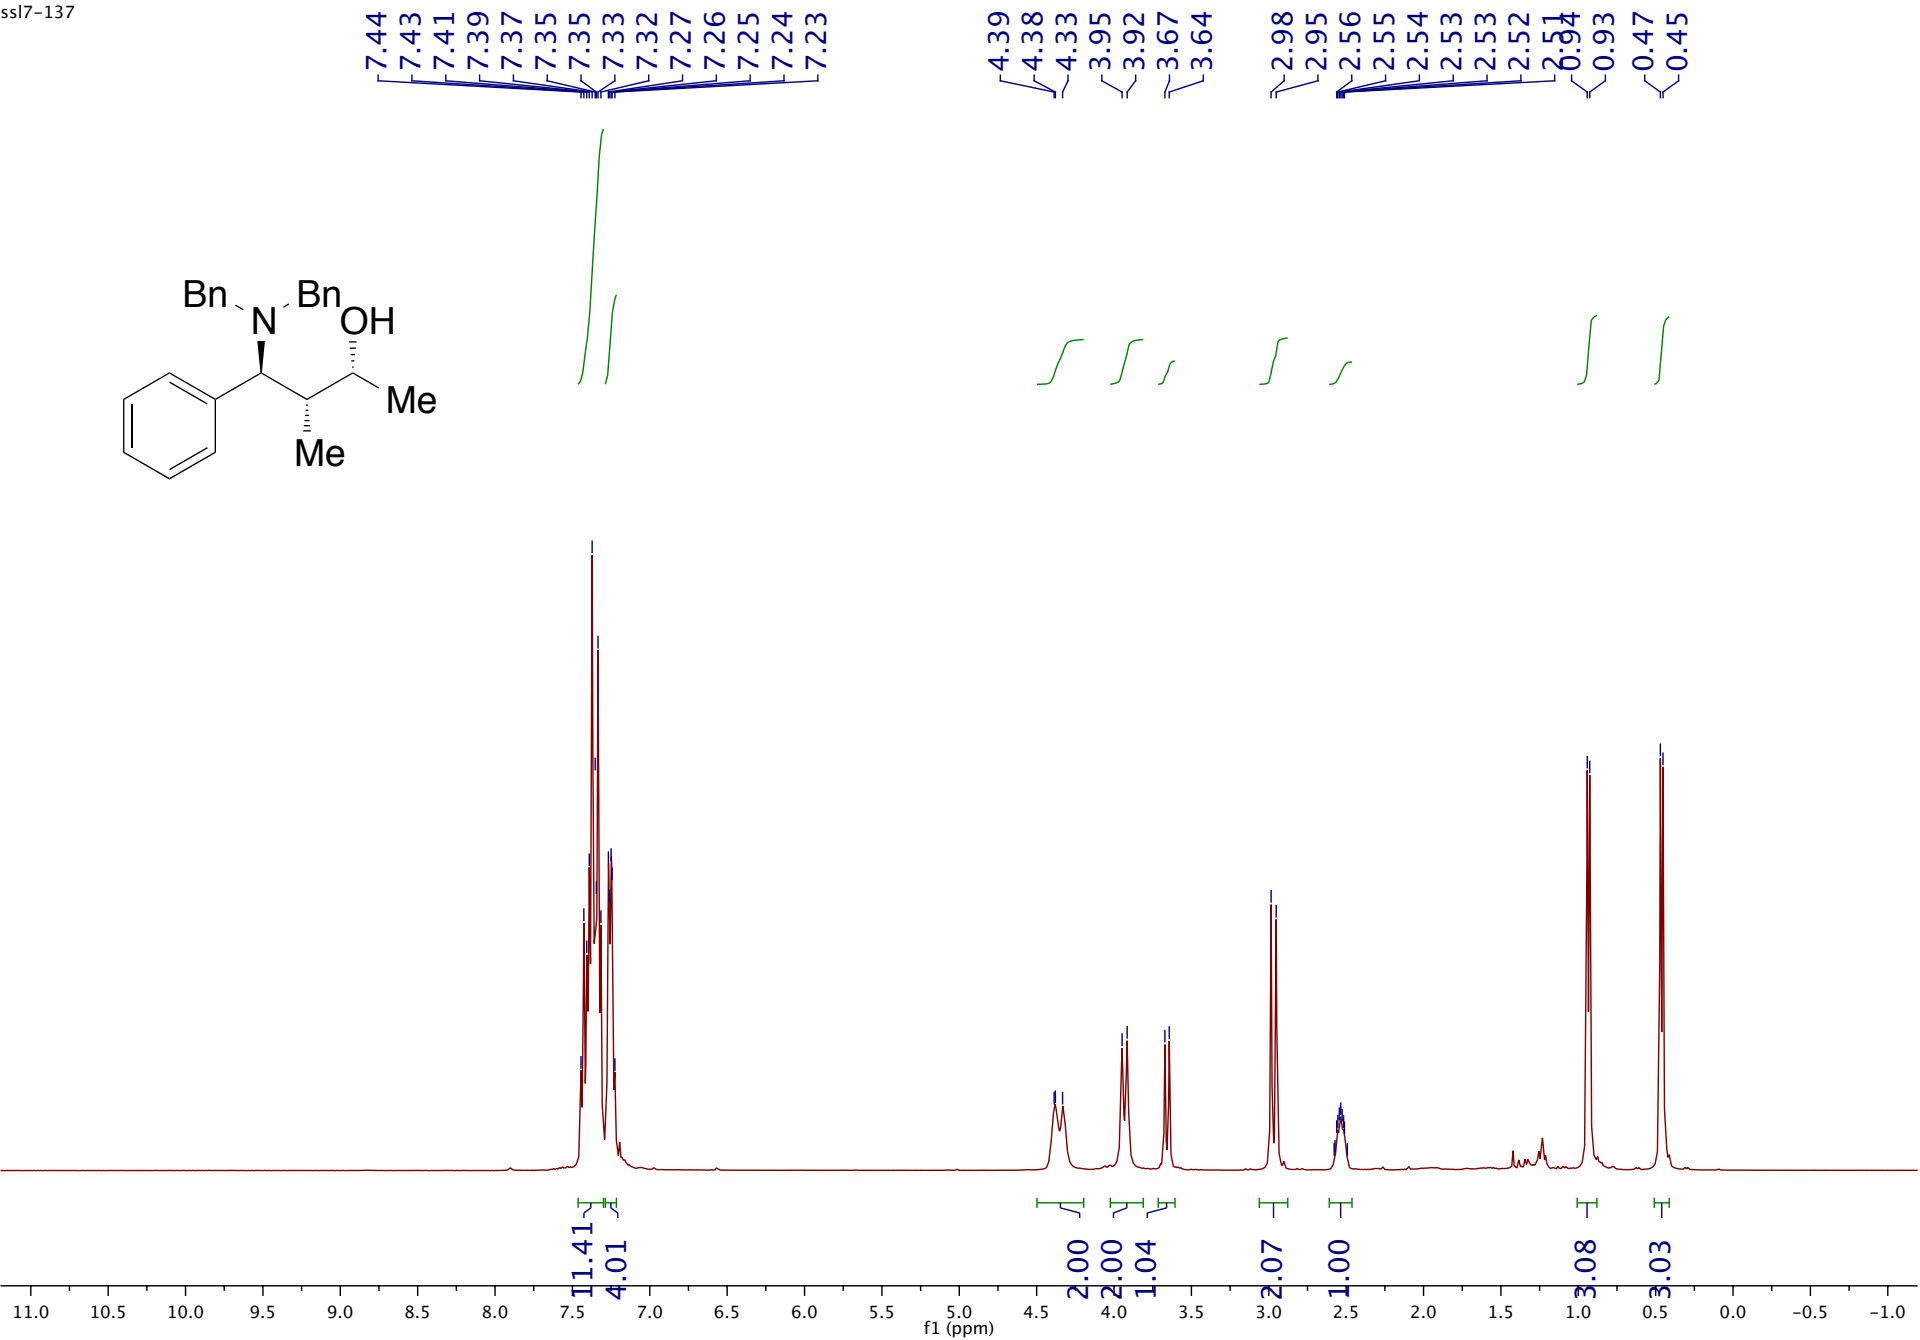

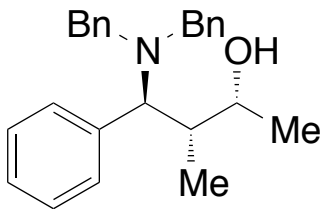

139.04  
 134.89  
 130.32  
 129.47  
 128.69  
 128.06  
 127.51  
 127.46

77.48 CDCl<sub>3</sub>  
 77.16 CDCl<sub>3</sub>  
 76.84 CDCl<sub>3</sub>  
 68.93  
 64.72

53.88

37.45

18.40  
 13.26

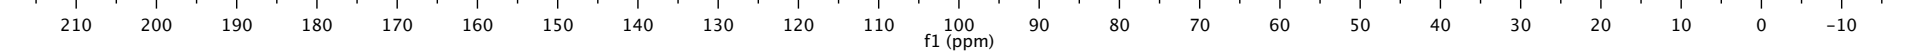

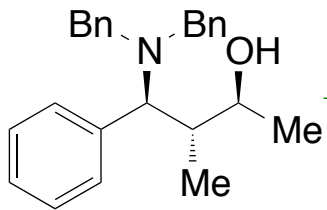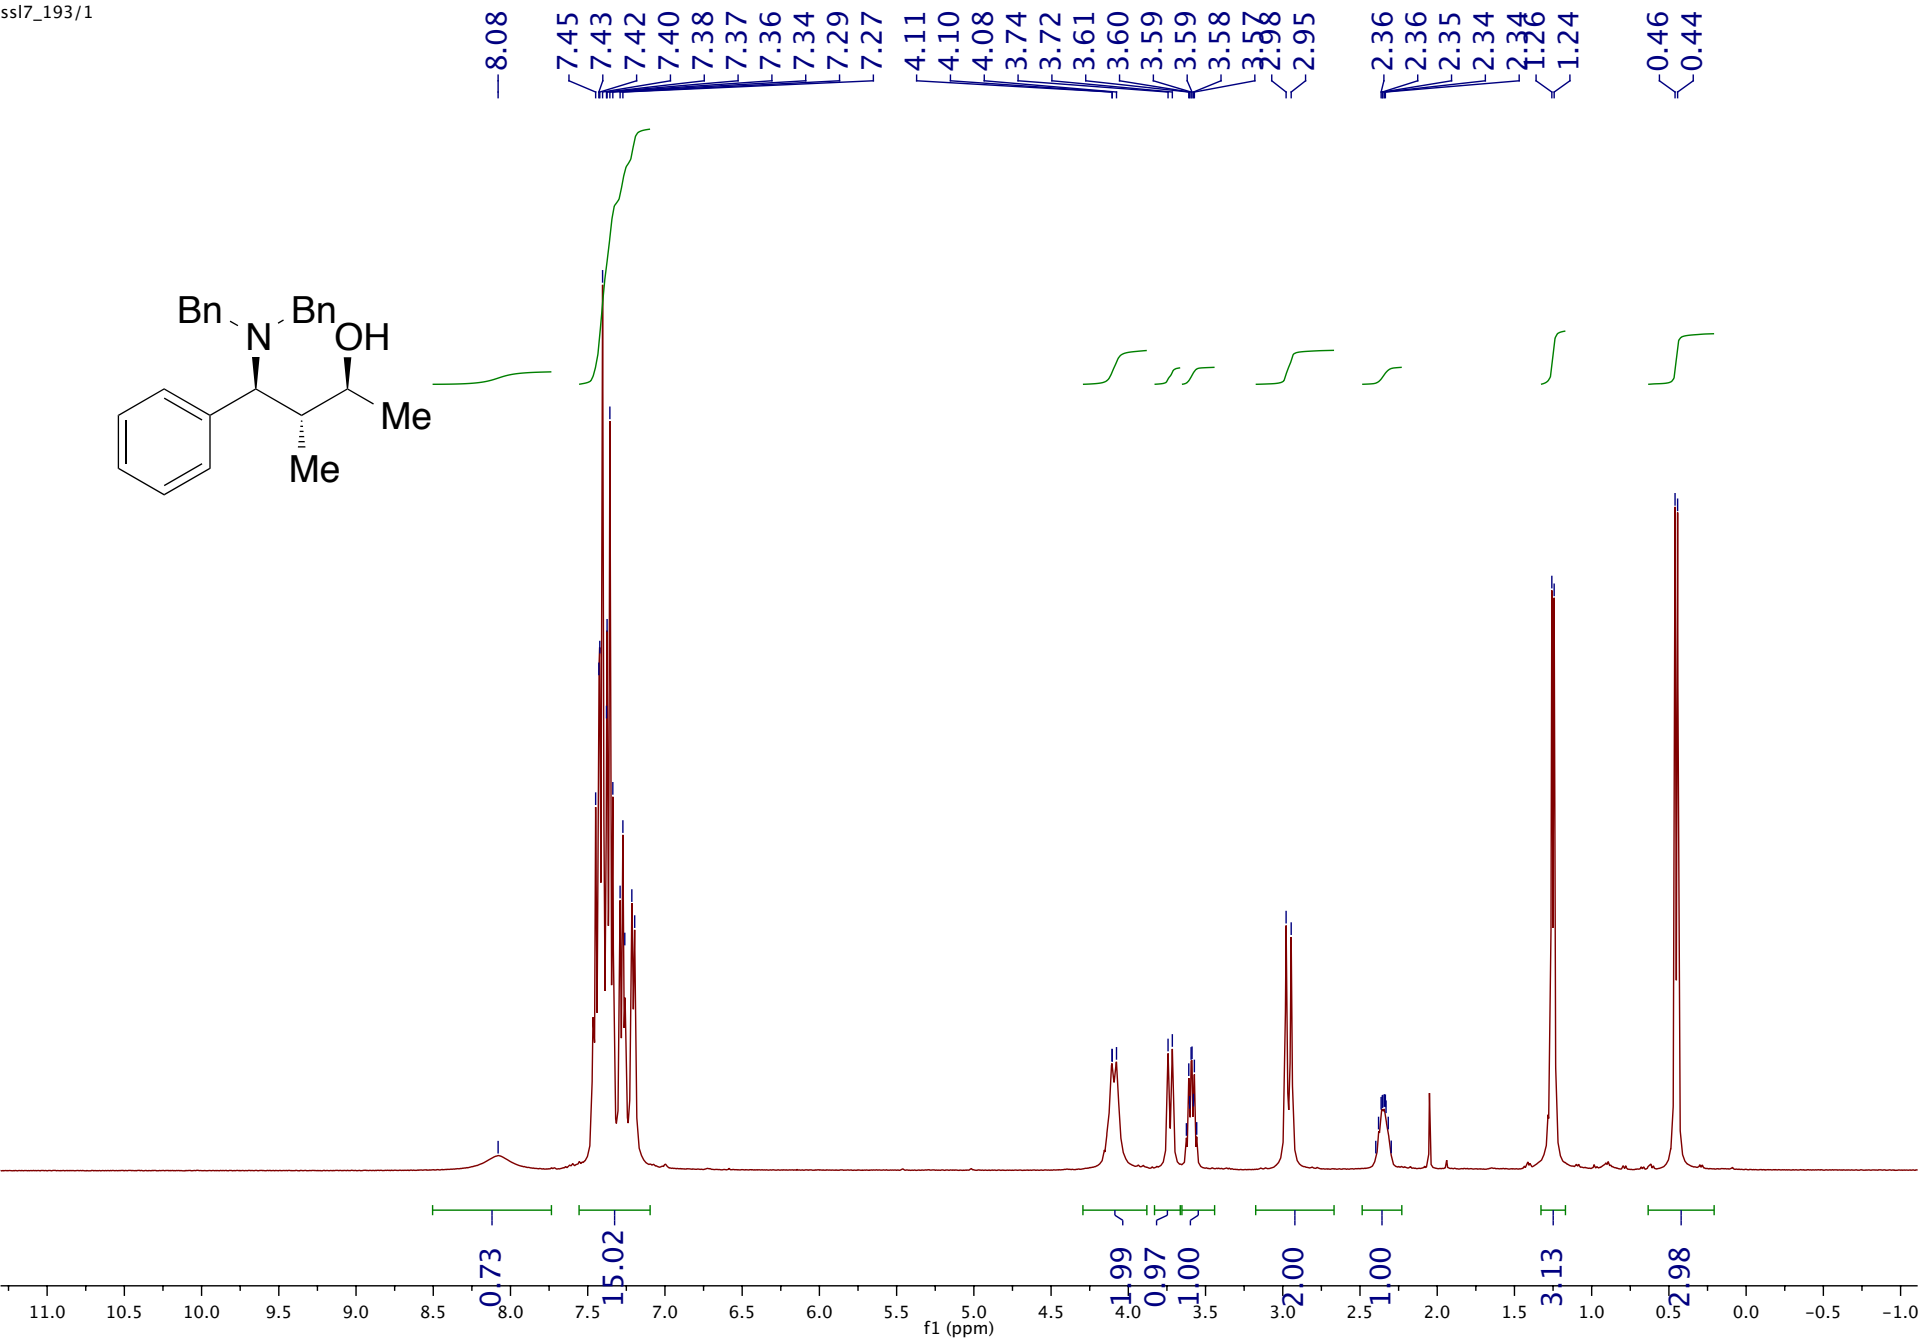



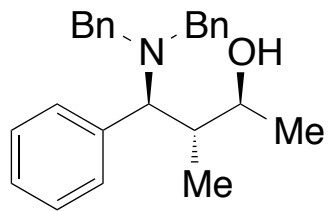

137.82  
 133.93  
 130.35  
 129.45  
 128.83  
 128.21  
 127.76  
 127.55

77.48 CDCl3  
 77.16 CDCl3  
 76.84 CDCl3  
 74.19  
 70.14

54.34

38.99

21.98

15.27

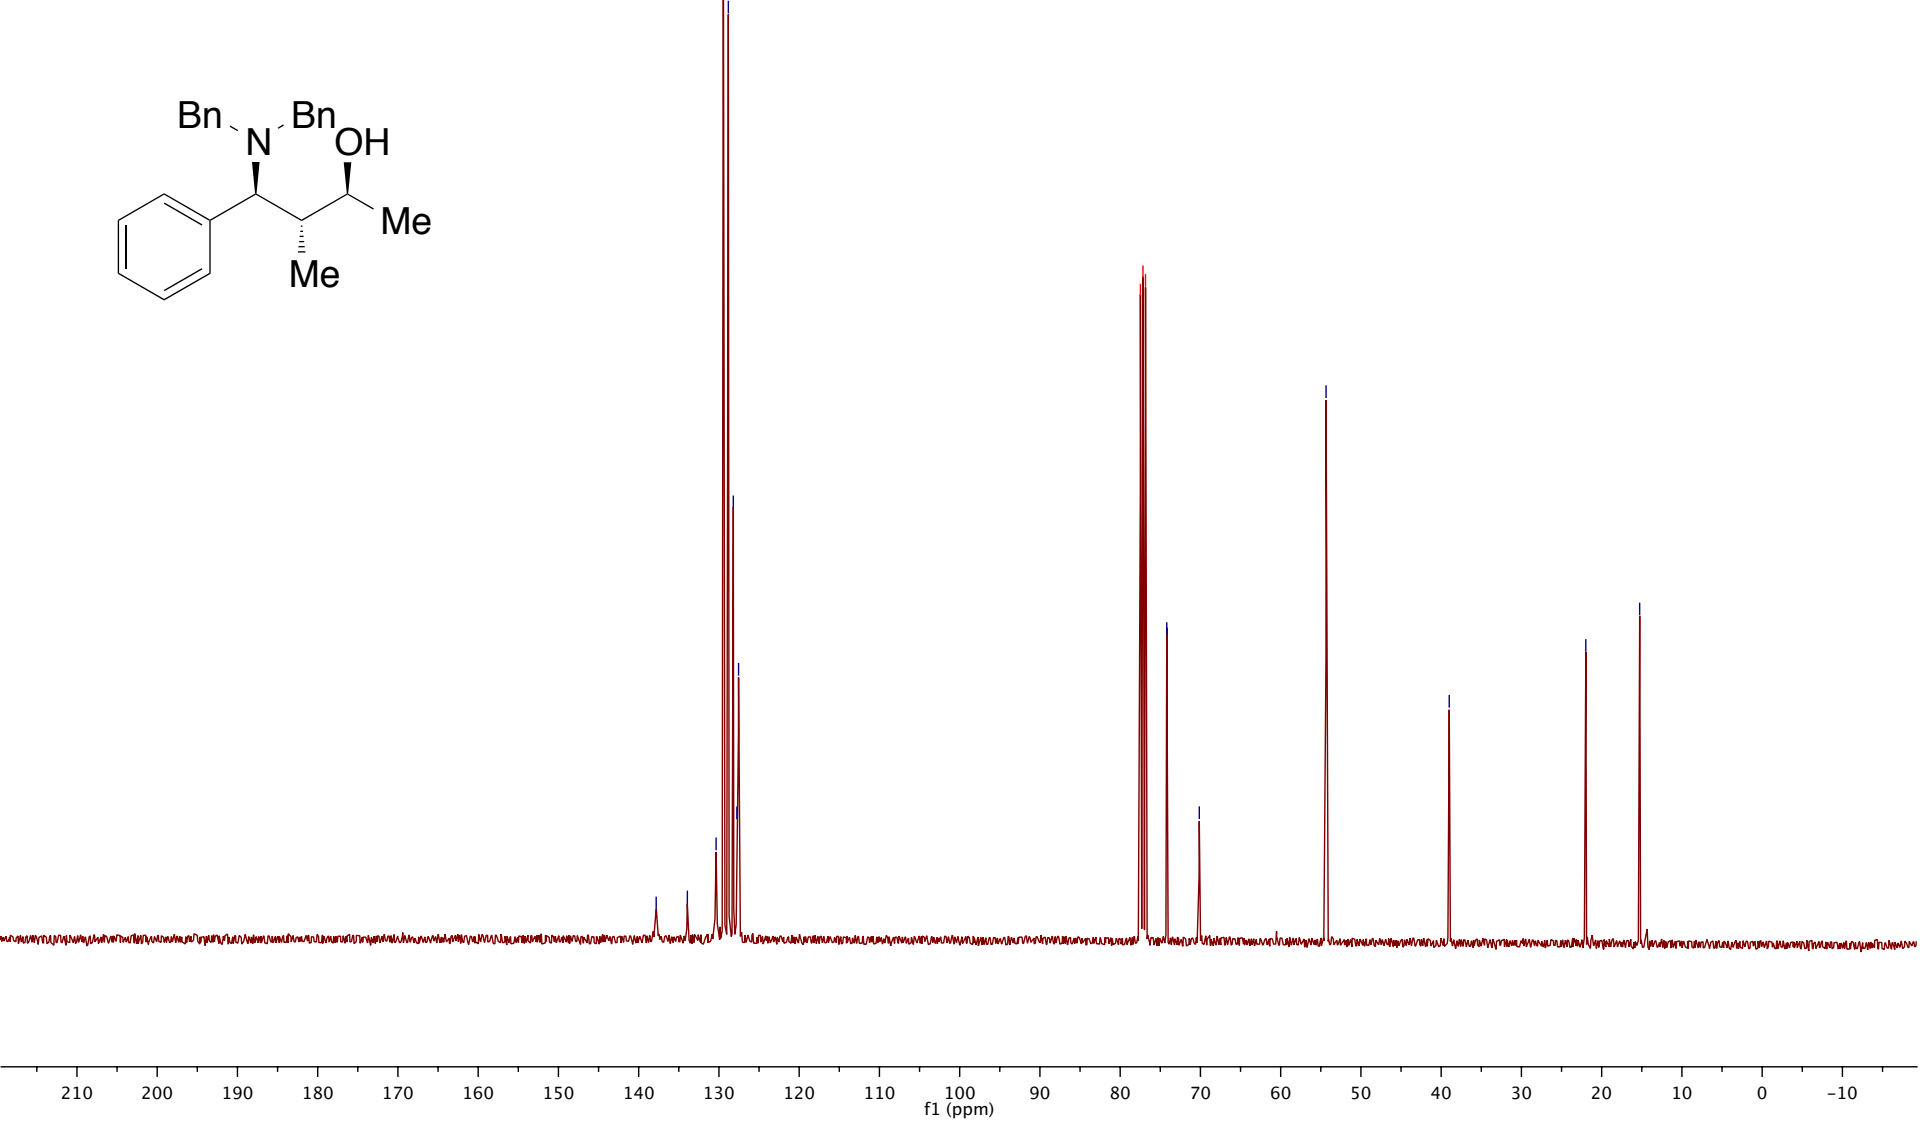

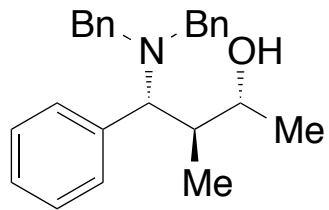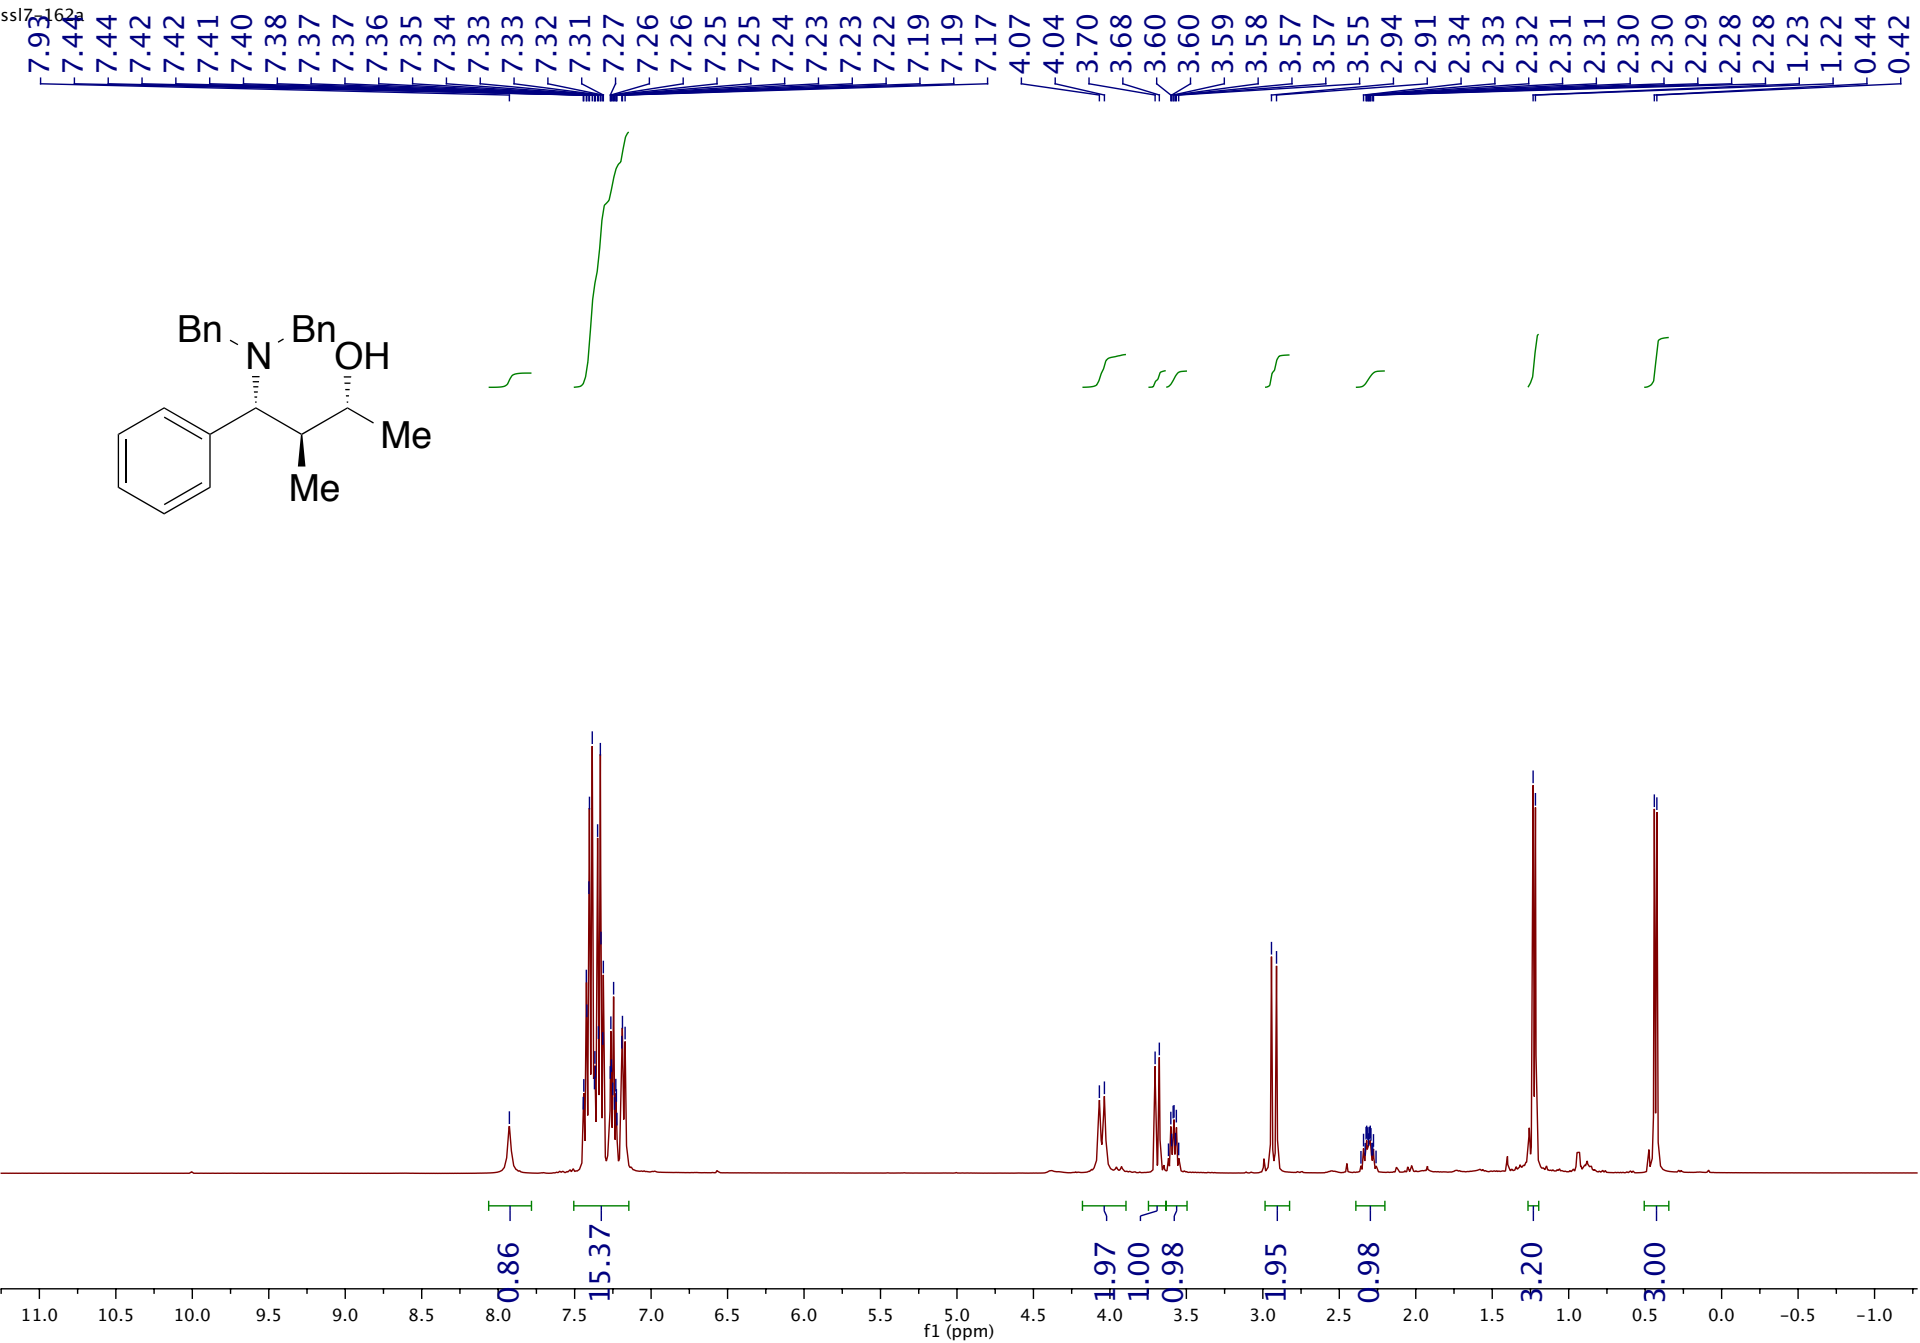

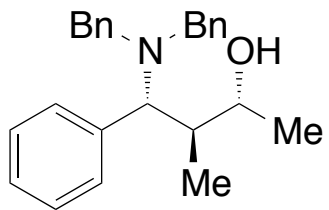

138.11  
134.12  
130.29  
129.41  
128.75  
128.13  
127.62  
127.43

77.48 CDCl3  
77.16 CDCl3  
76.84 CDCl3  
74.14  
69.99

54.32

39.03

21.91

15.22

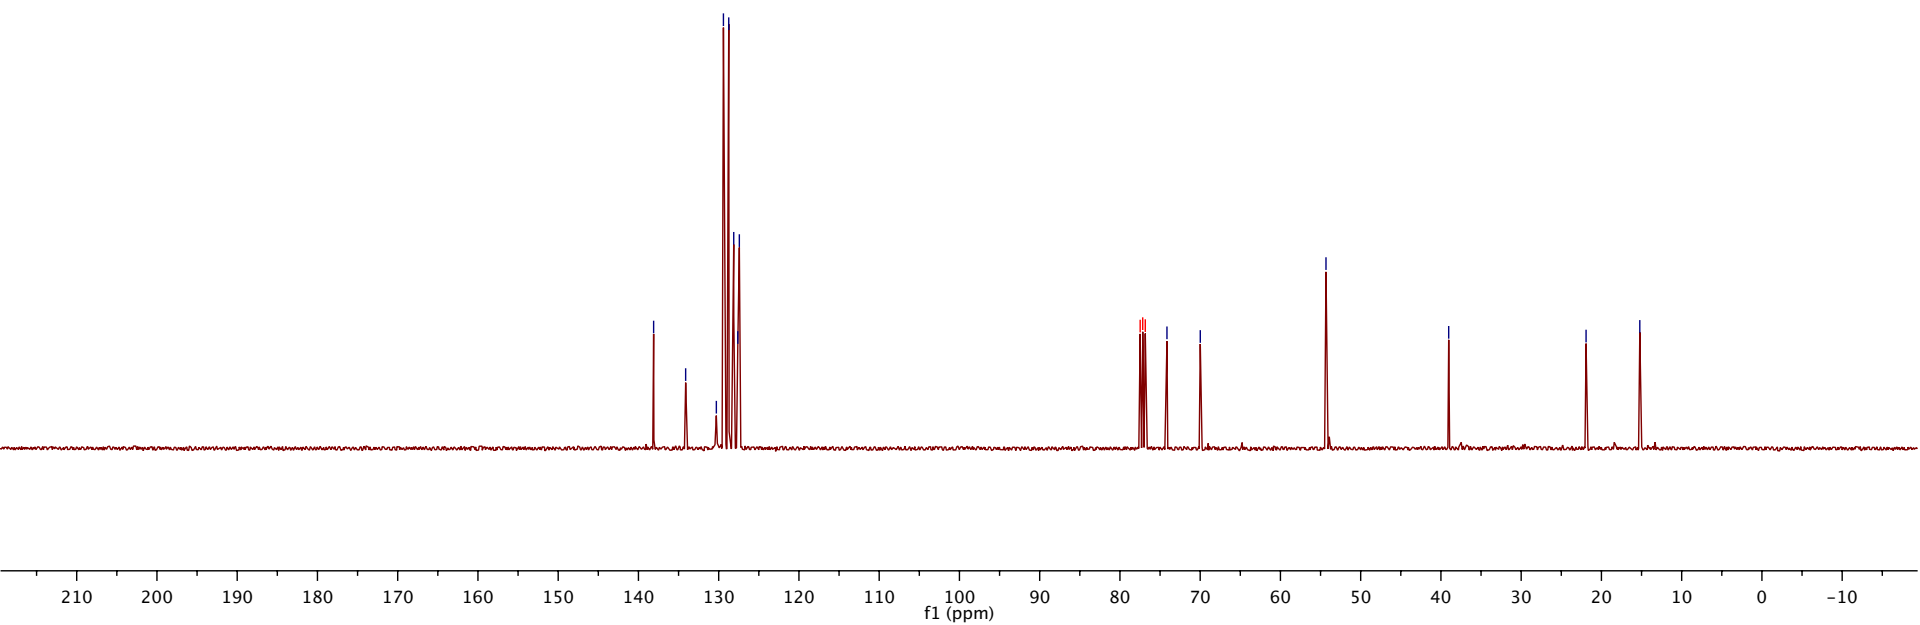

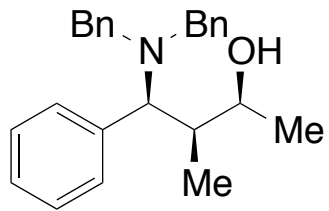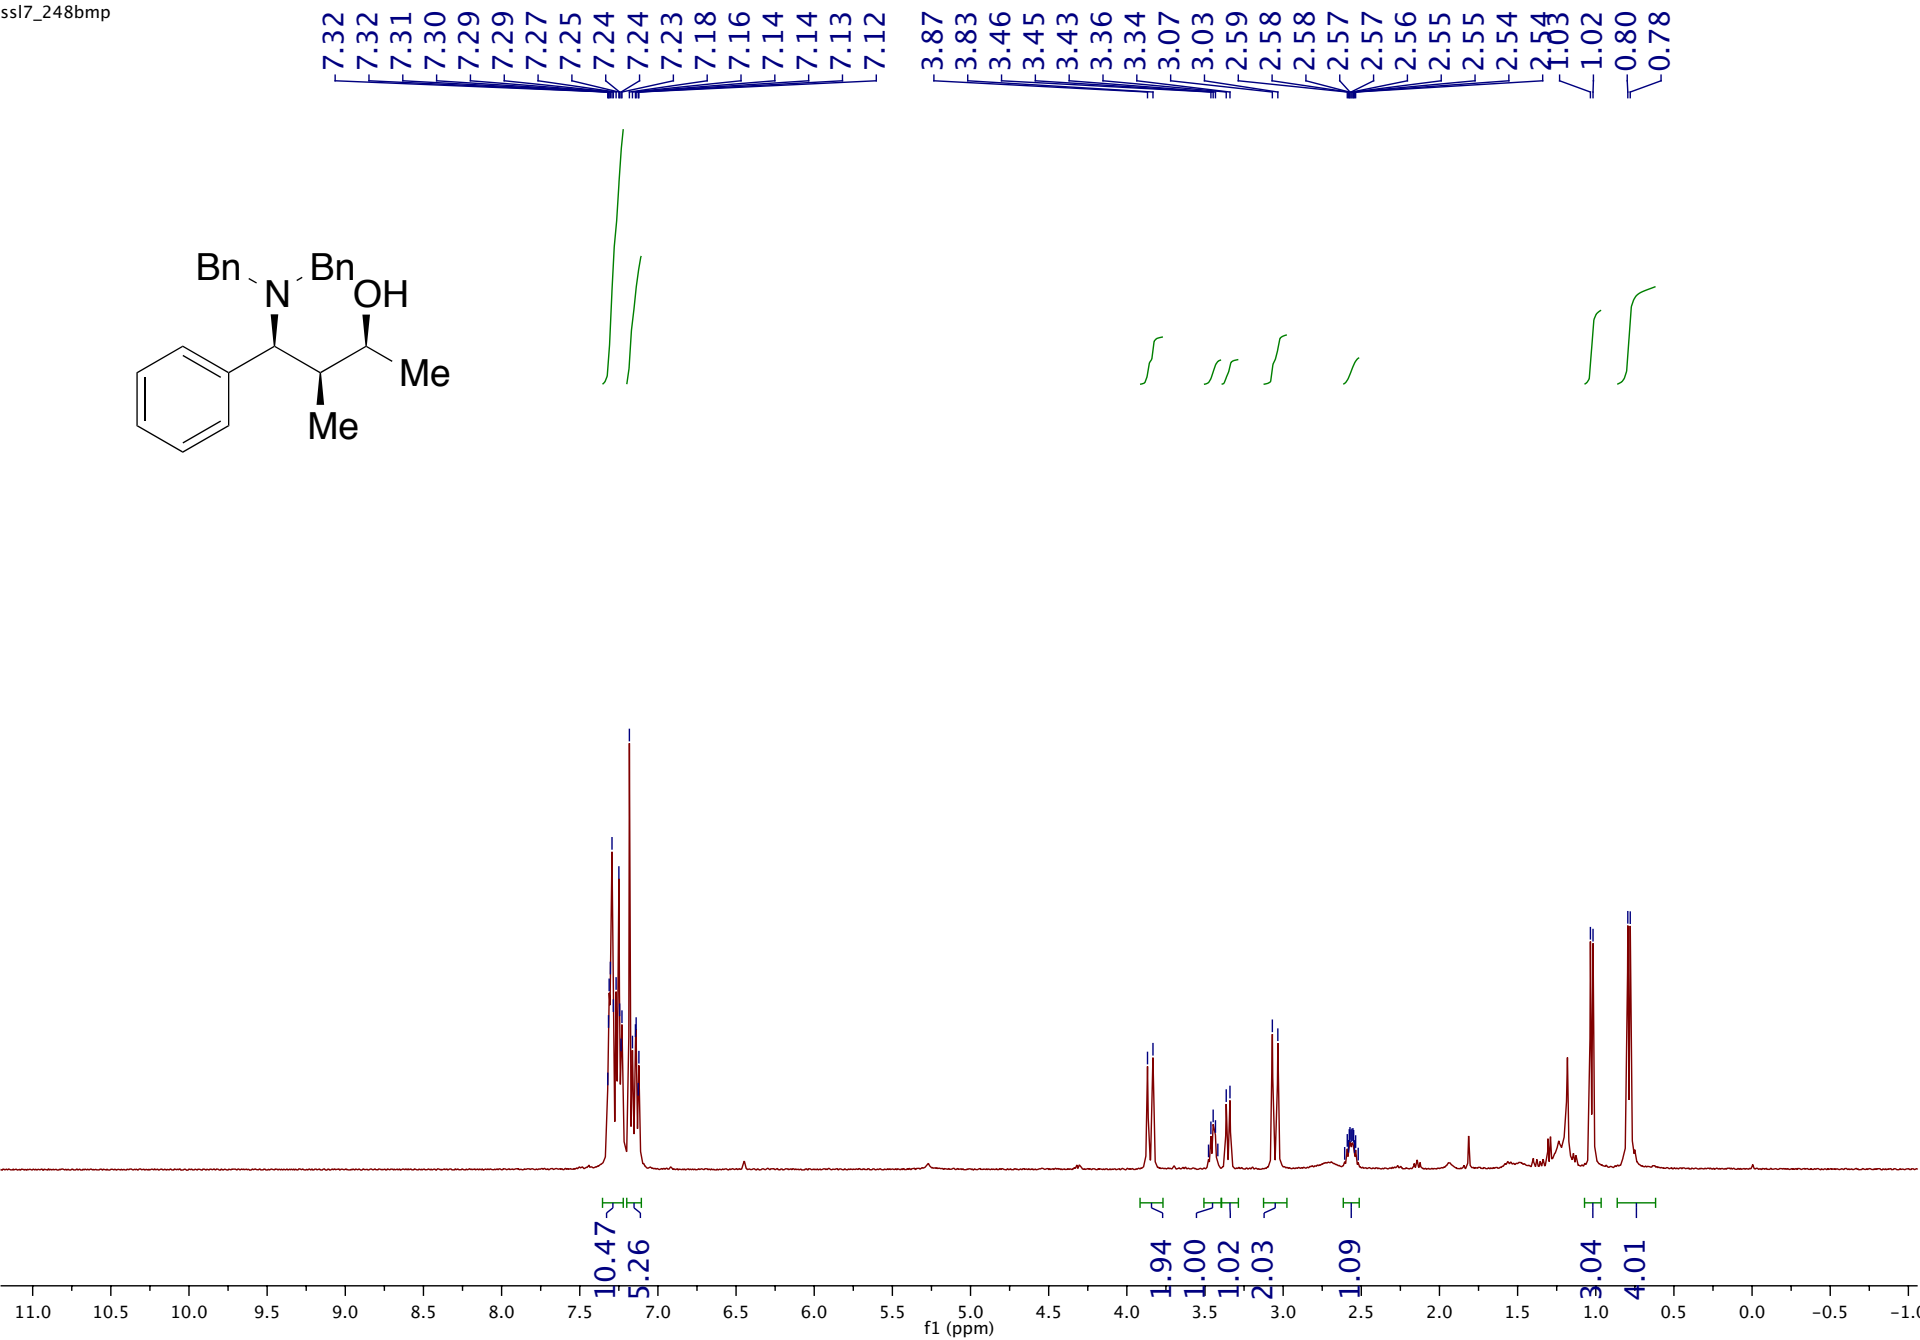

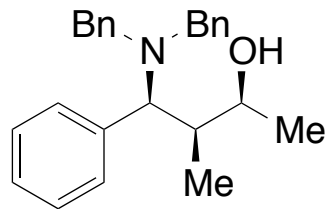

139.11  
135.91  
129.59  
128.91  
128.31  
128.10  
127.35  
126.90

~68.79  
~66.57

—53.28

—39.65

—17.76

—11.79

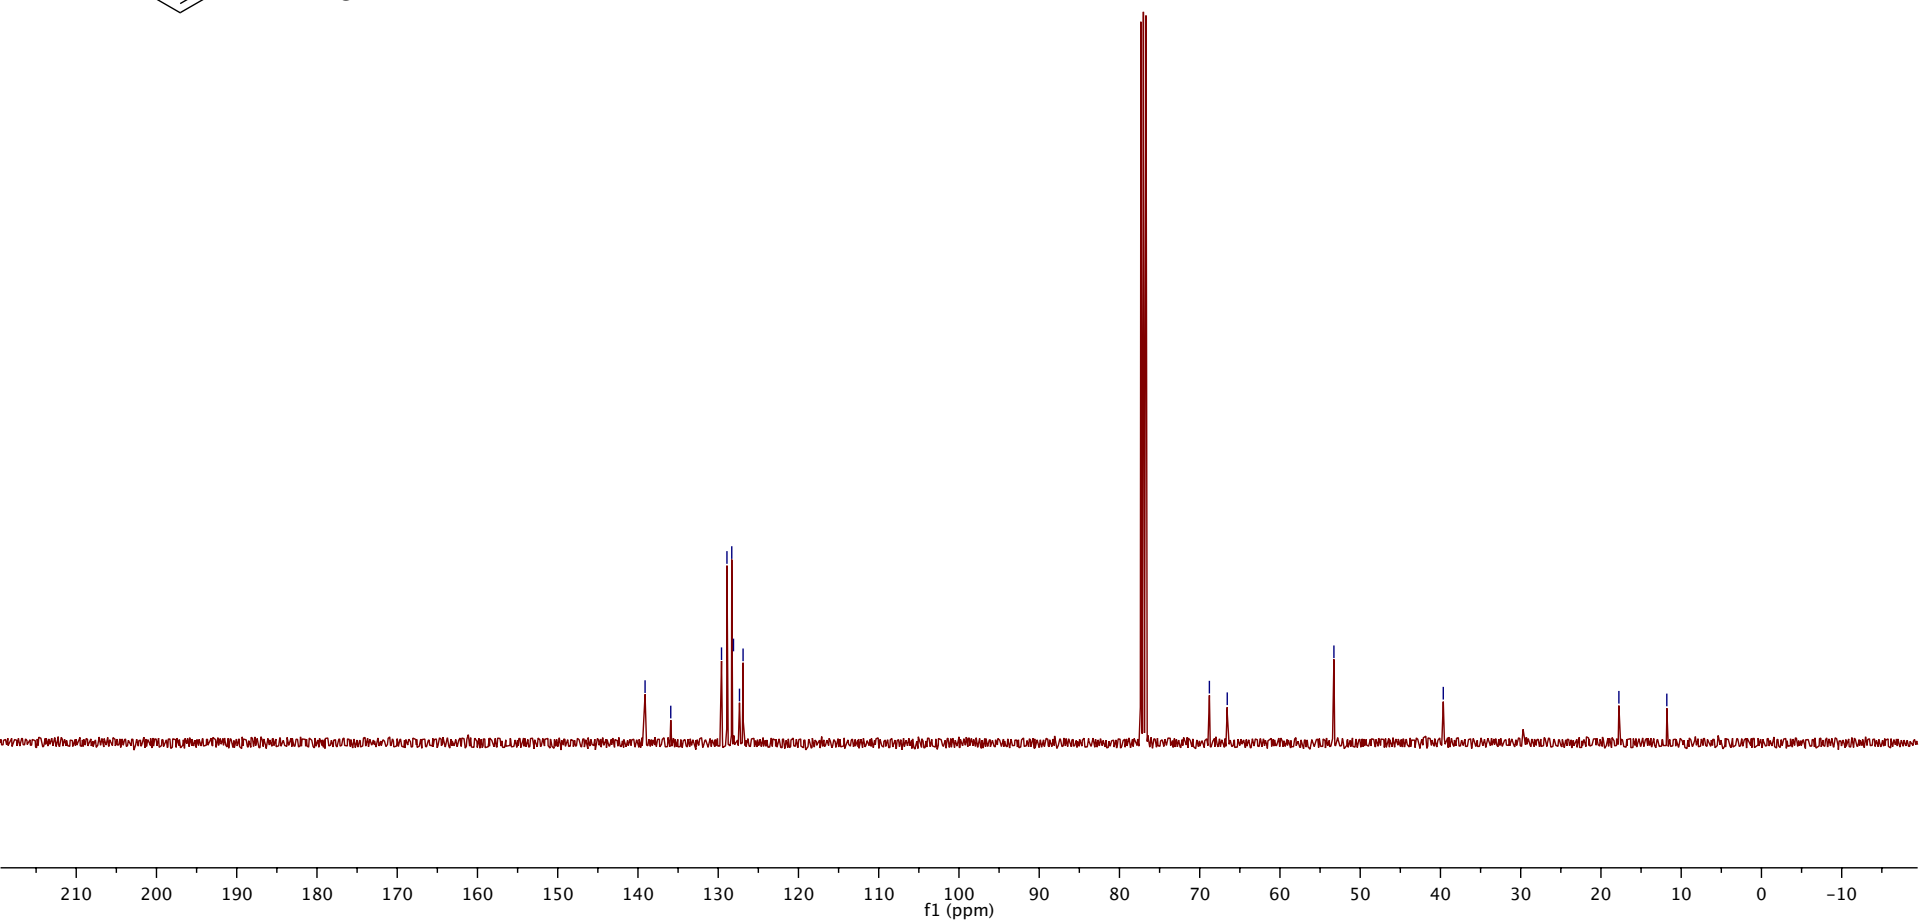

7.30  
7.30  
7.29  
7.29  
7.28  
7.27  
7.26  
7.25  
7.24  
7.24  
7.23  
7.23  
7.22  
7.21  
7.17  
7.15  
7.15  
7.13  
7.12  
7.12  
7.11  
7.10  
7.10

3.44  
3.43  
3.43  
3.42  
3.35  
3.32  
3.05  
3.02  
2.57  
2.56  
2.56  
2.55  
2.55  
2.54  
2.54  
2.53  
1.51  
1.02  
1.00  
0.78  
0.76

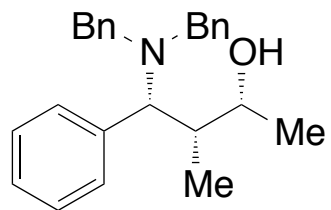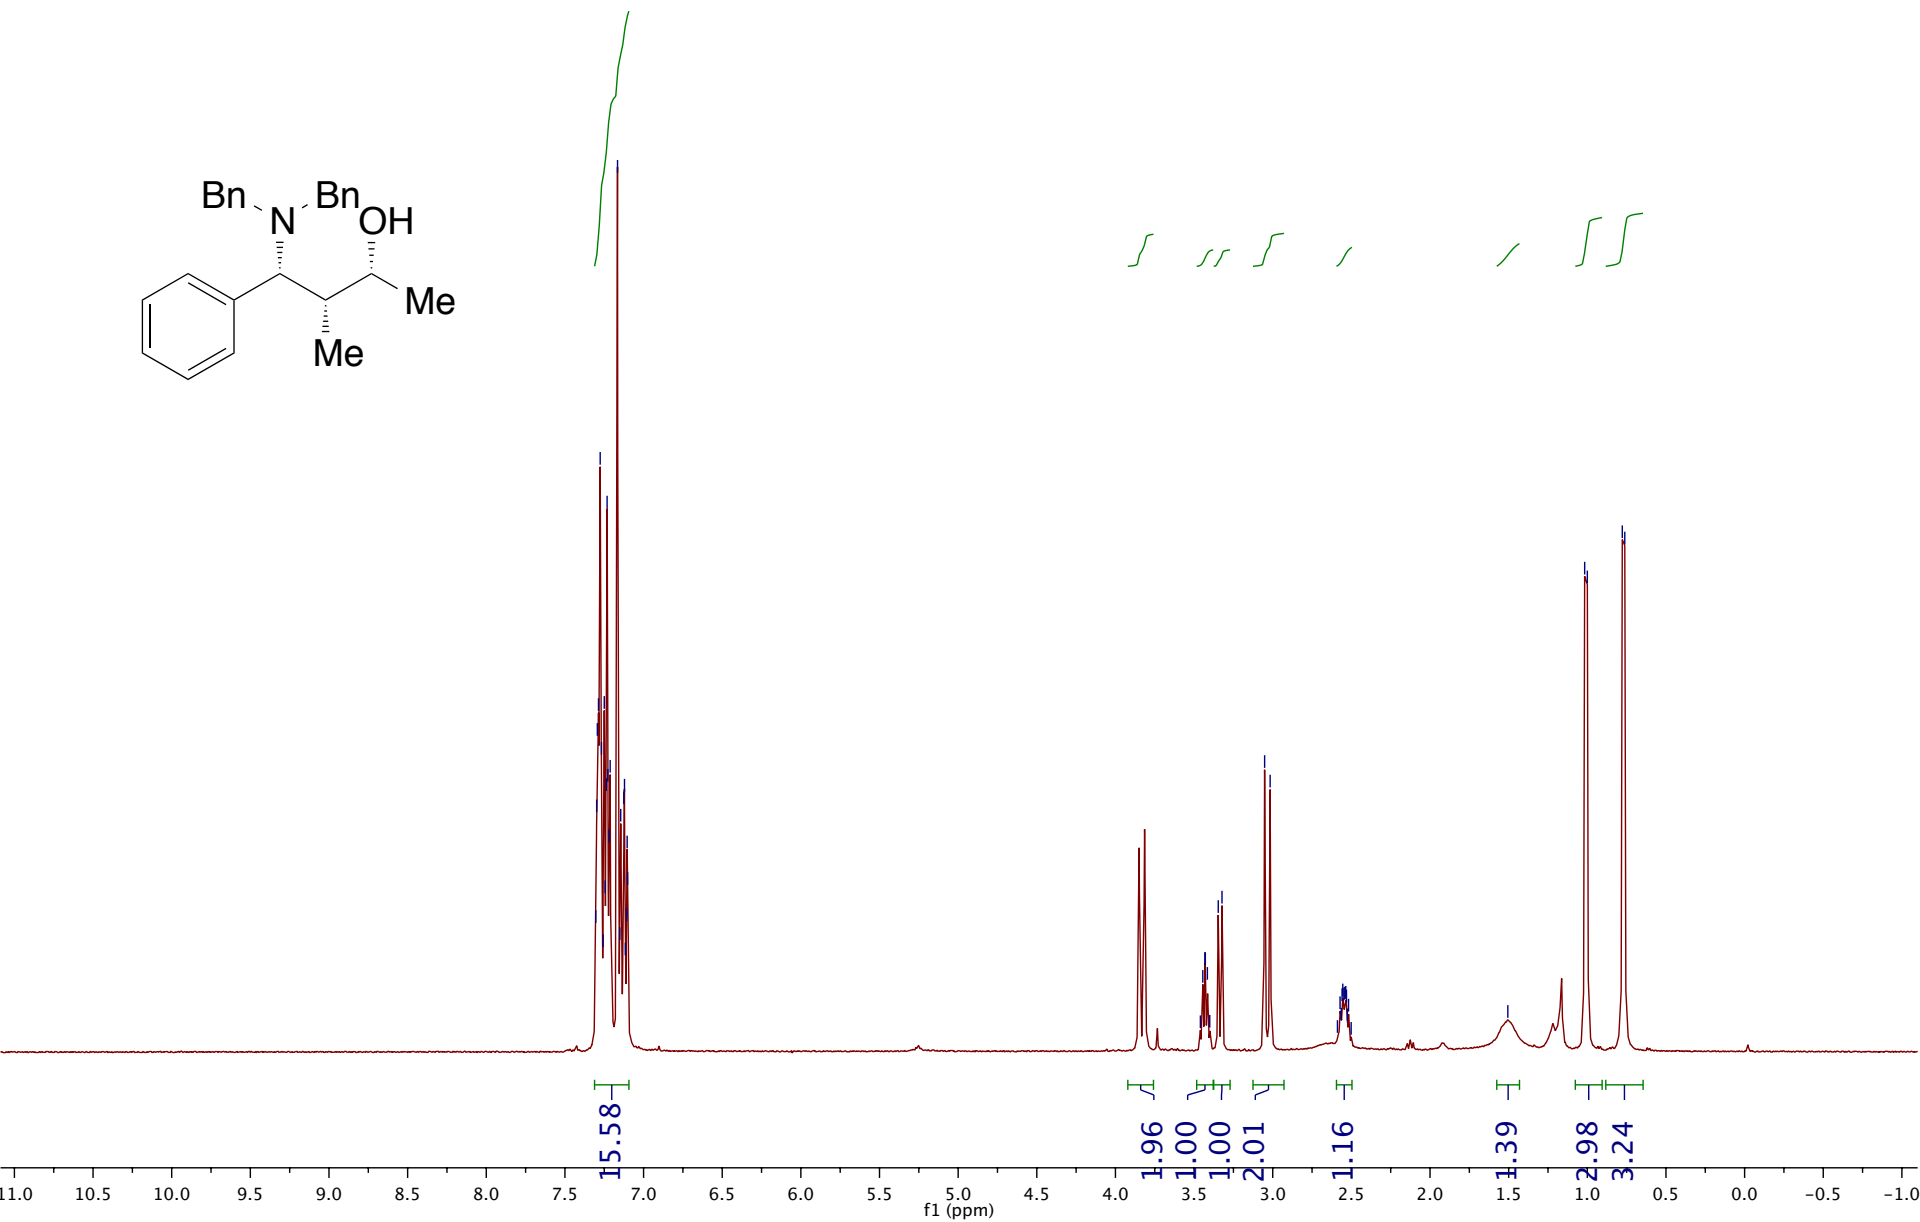

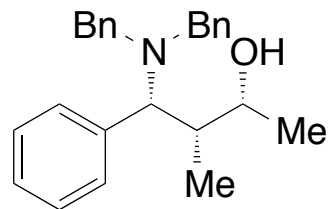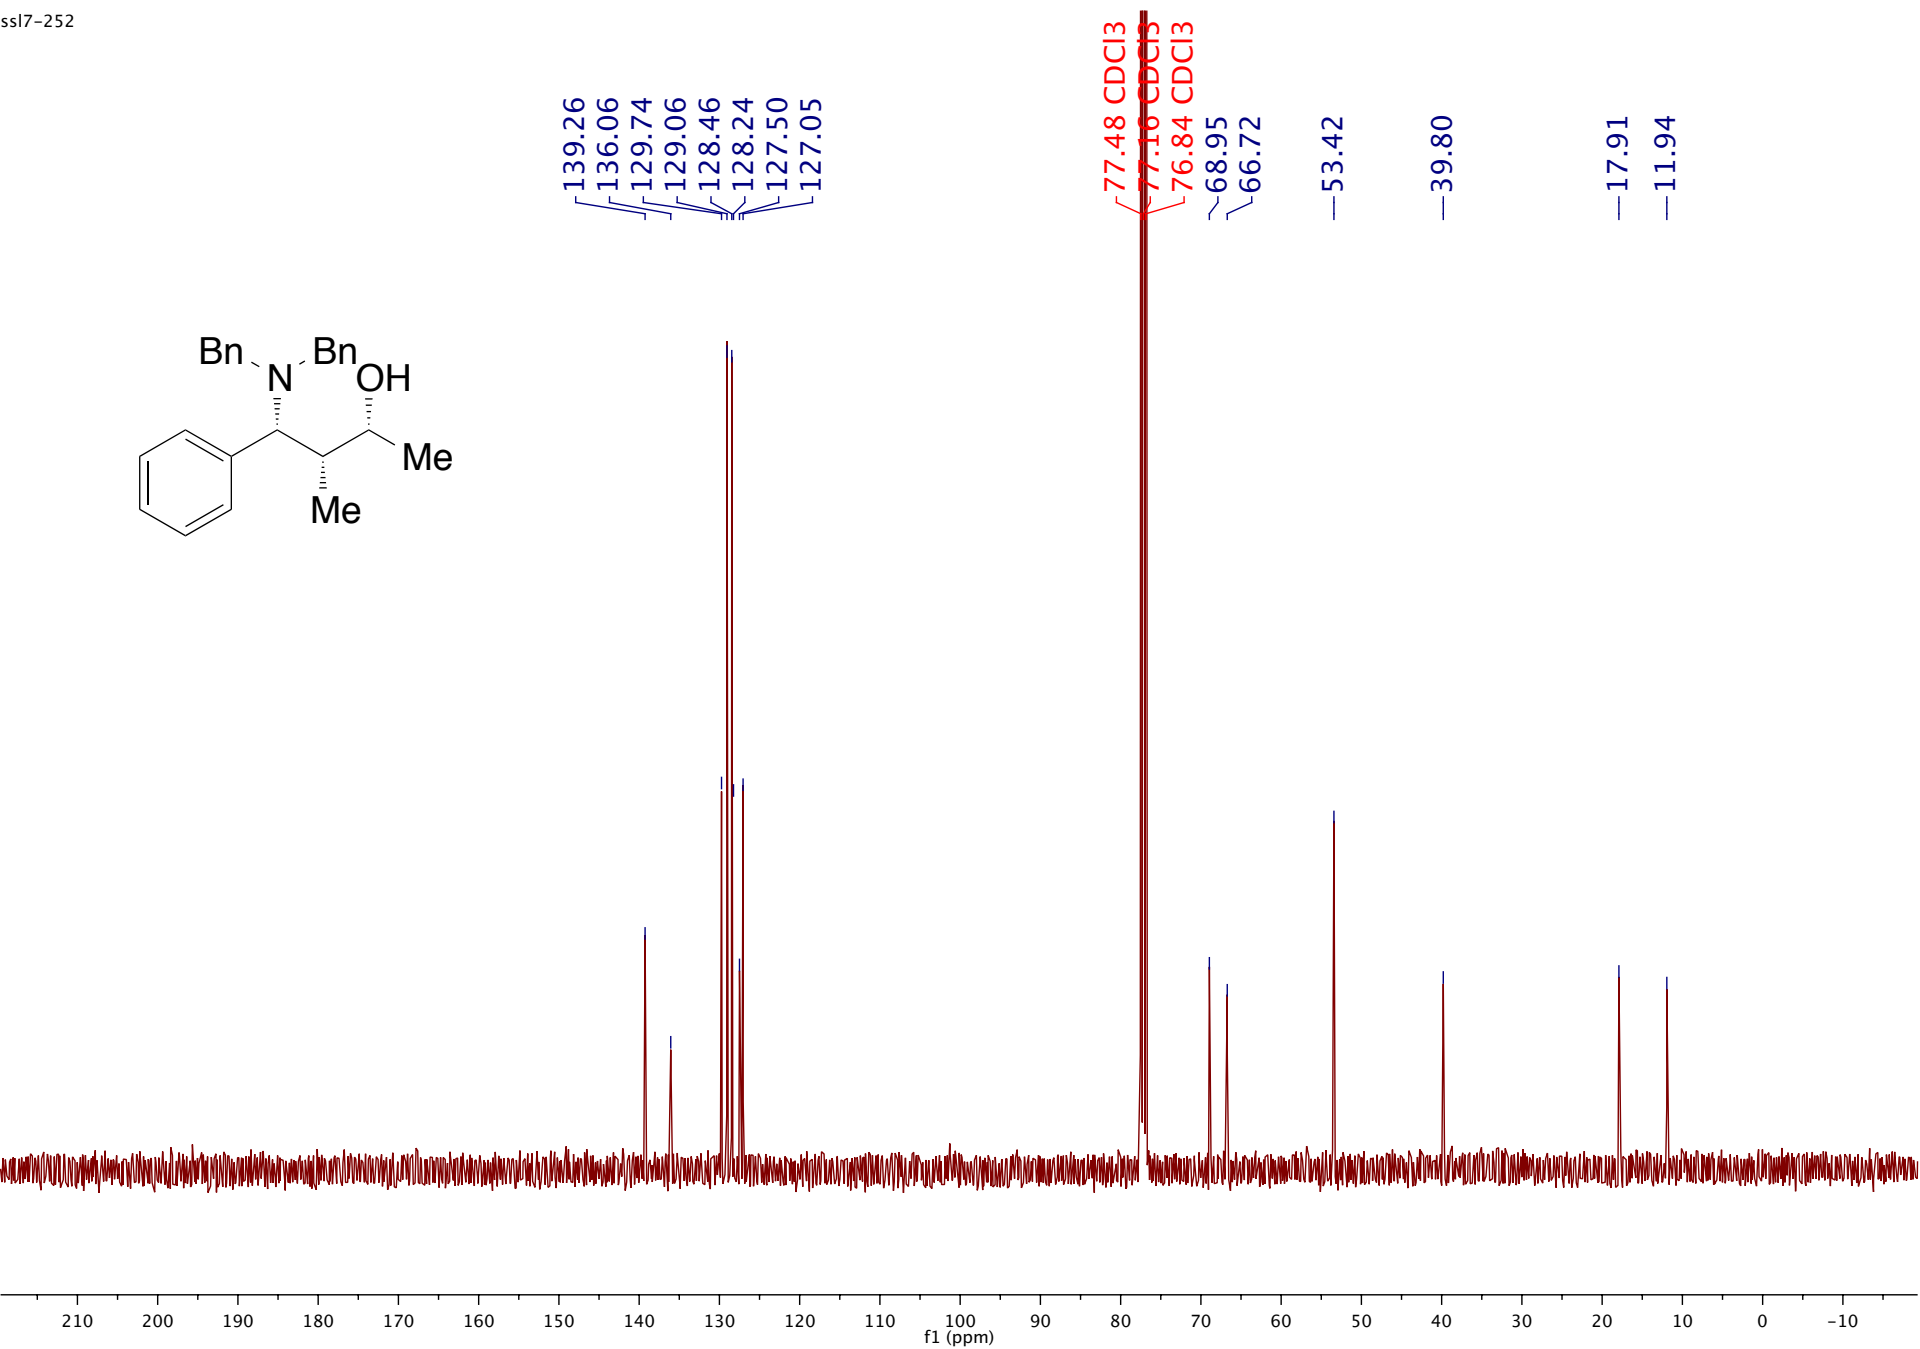

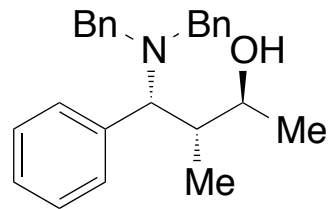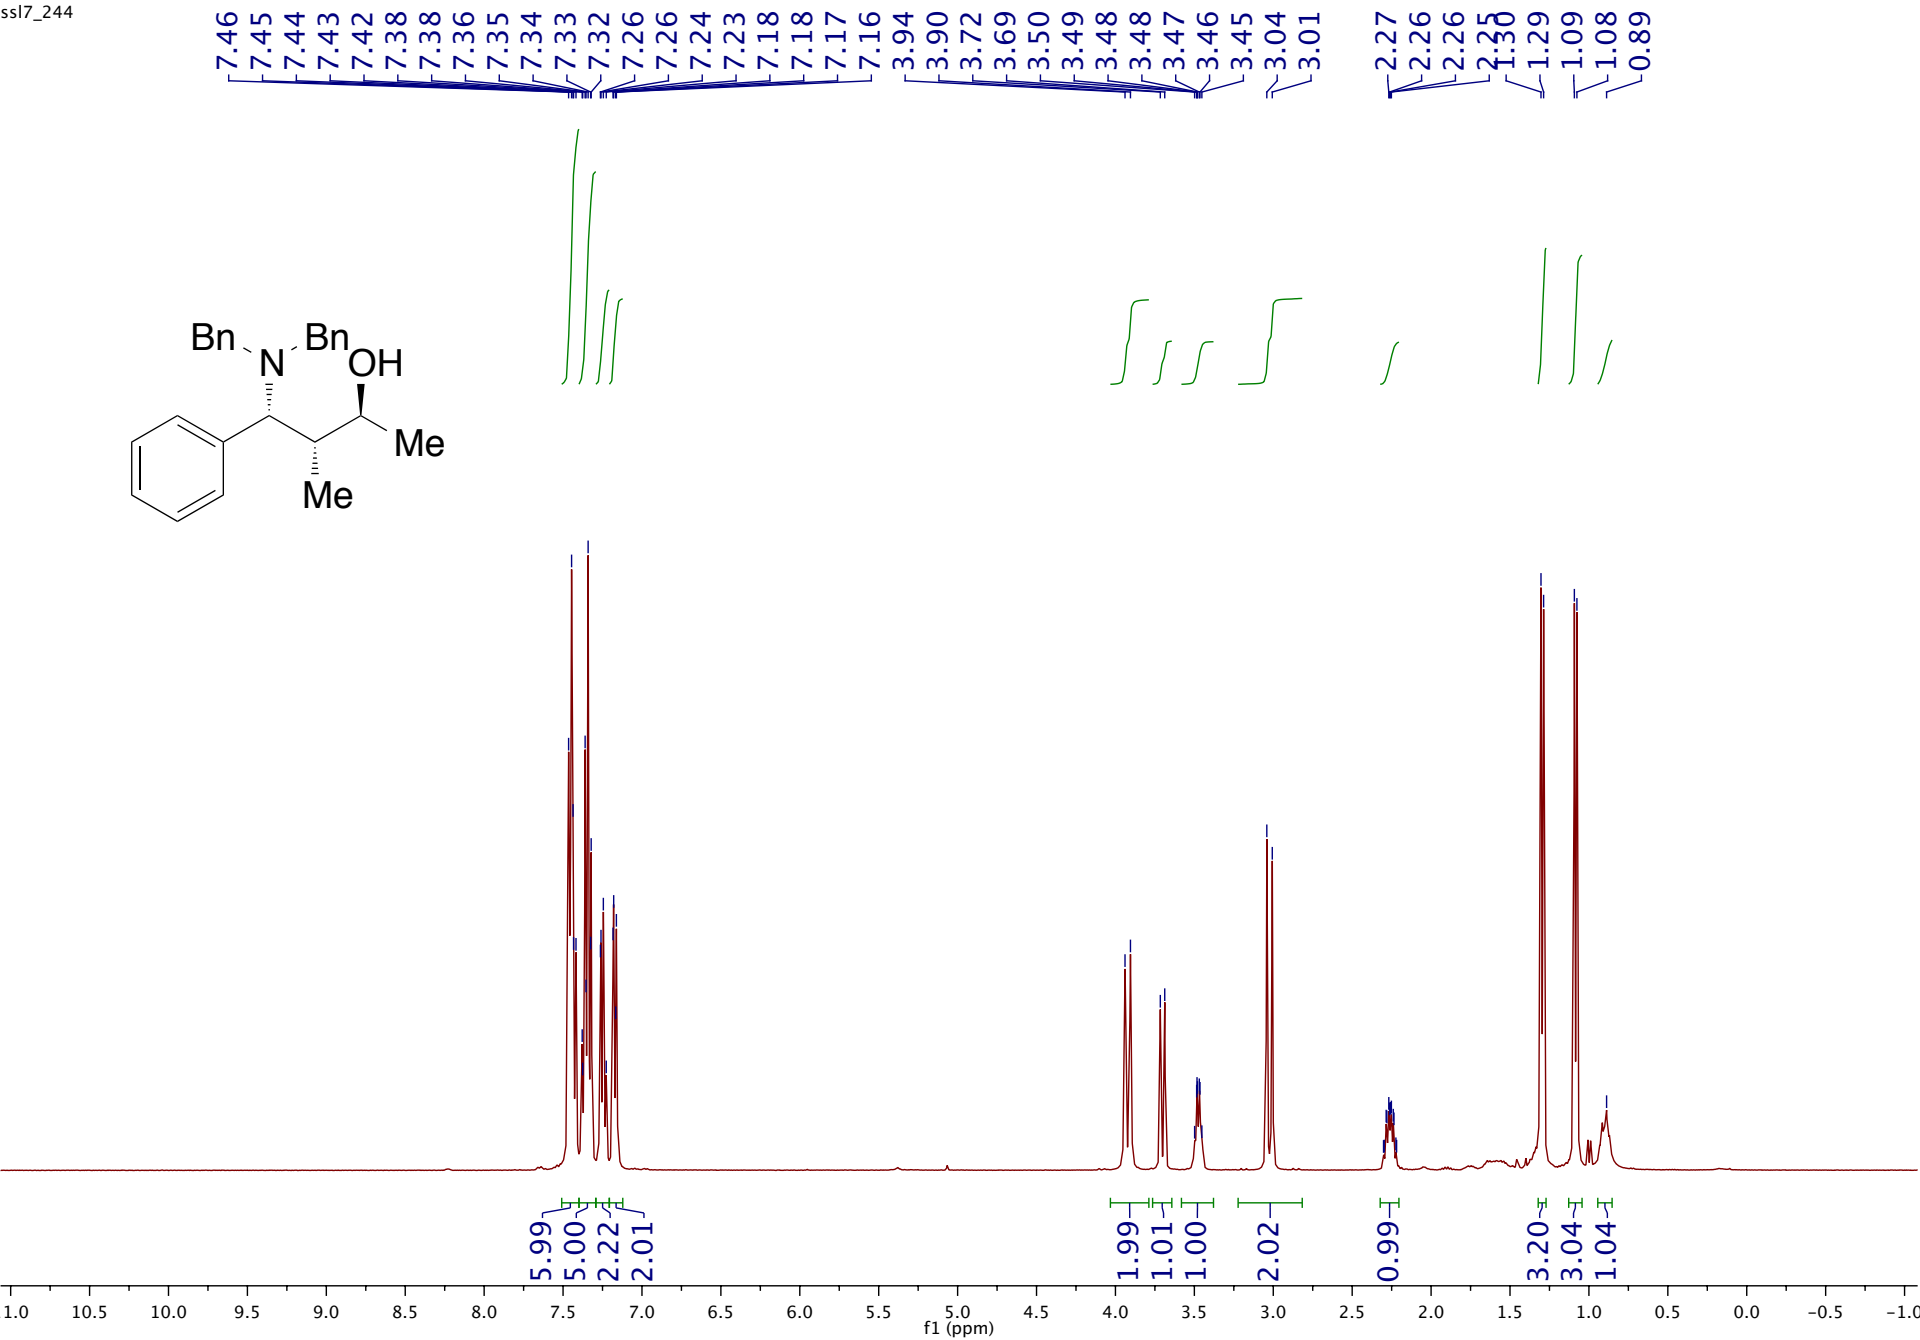



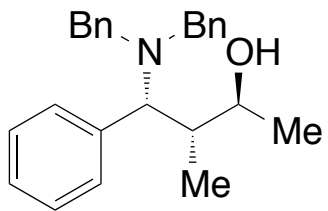

140.13  
 136.22  
 129.78  
 128.83  
 128.43  
 128.21  
 127.30  
 126.91

77.48 CDCl3  
 77.16 CDCl3  
 76.84 CDCl3  
 67.48  
 65.03

53.84

39.95

21.88

9.73

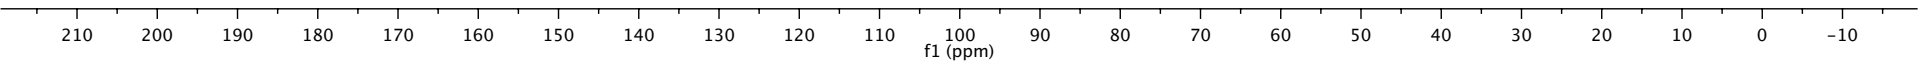

ss17\_196a

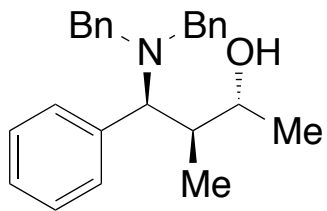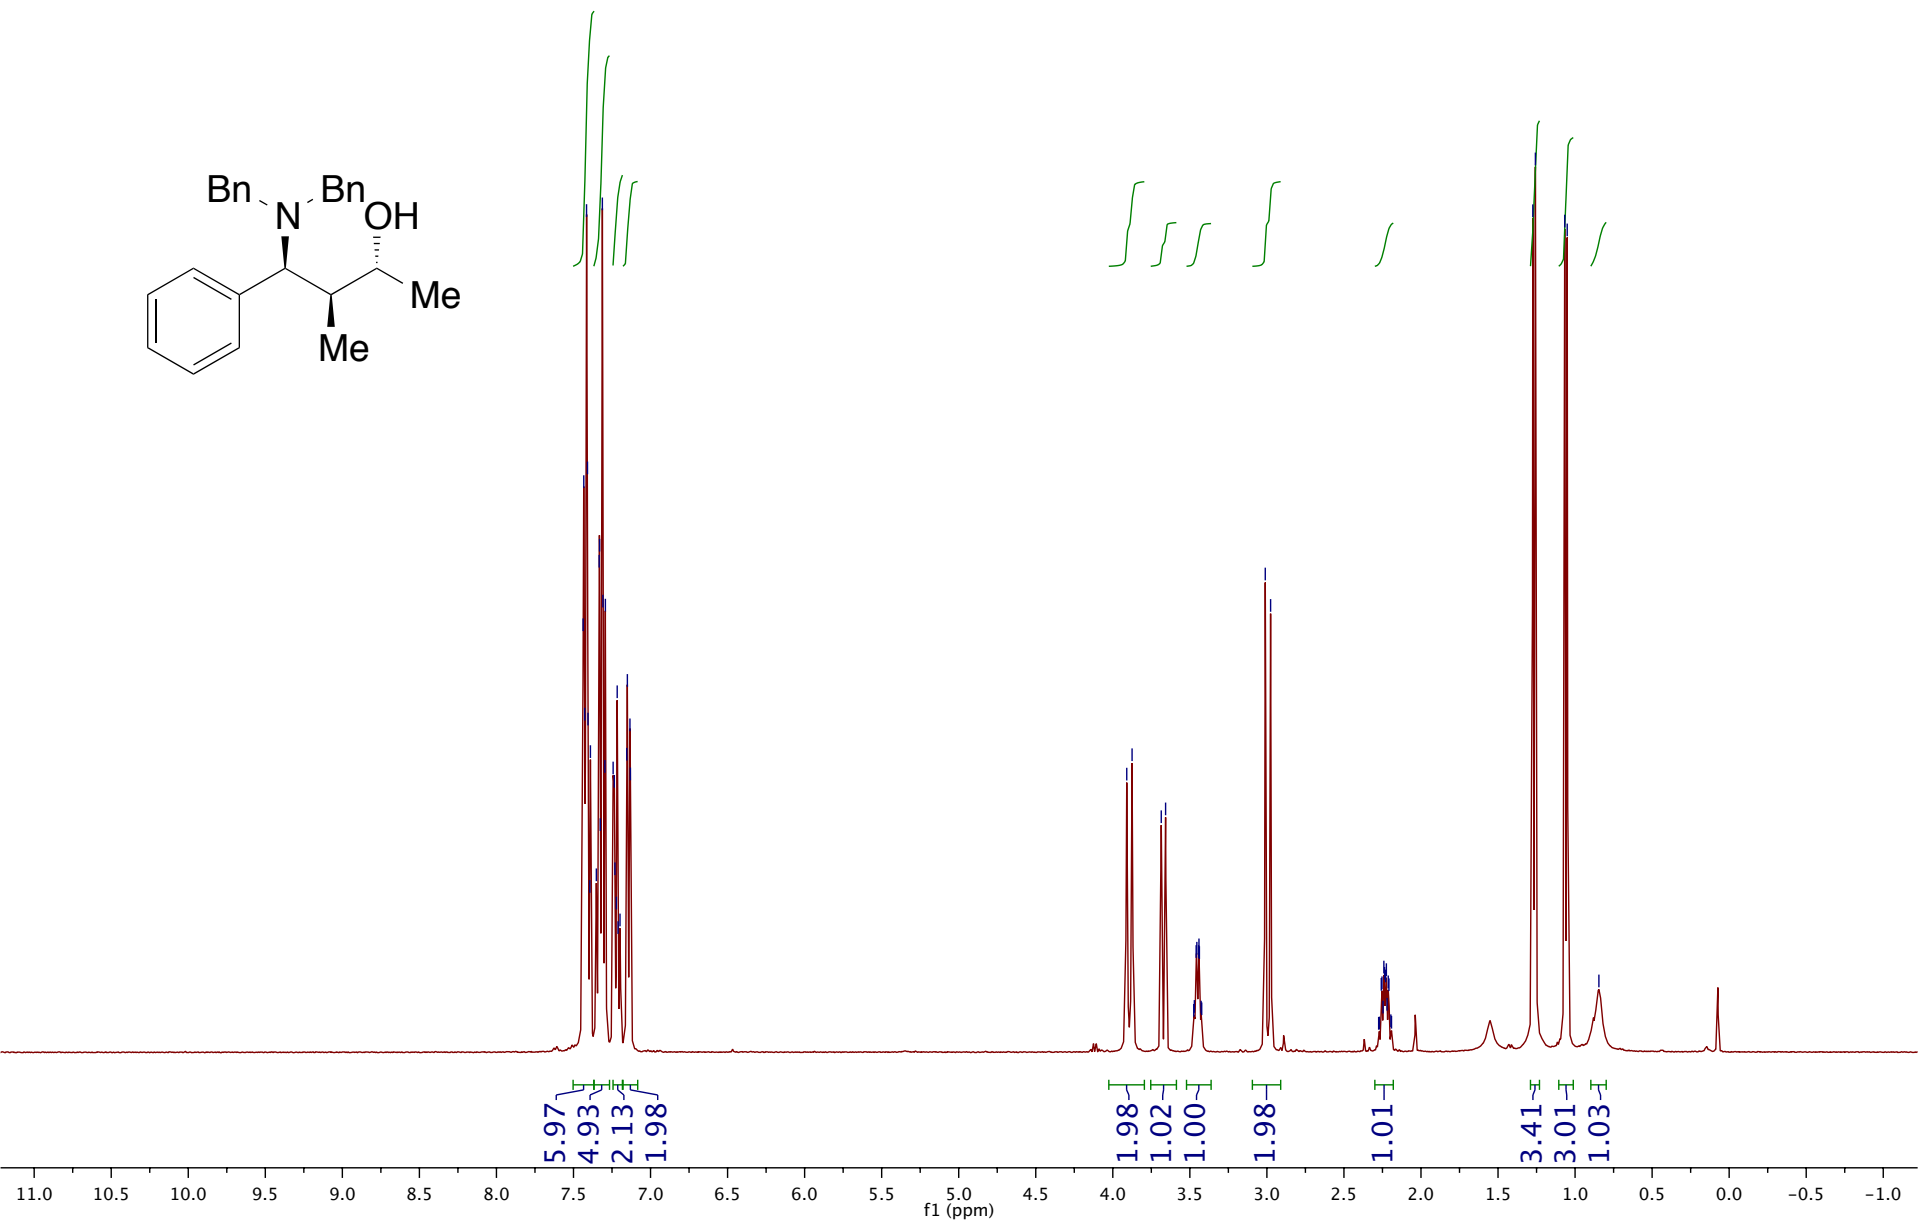

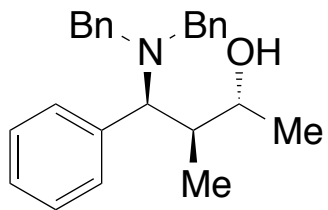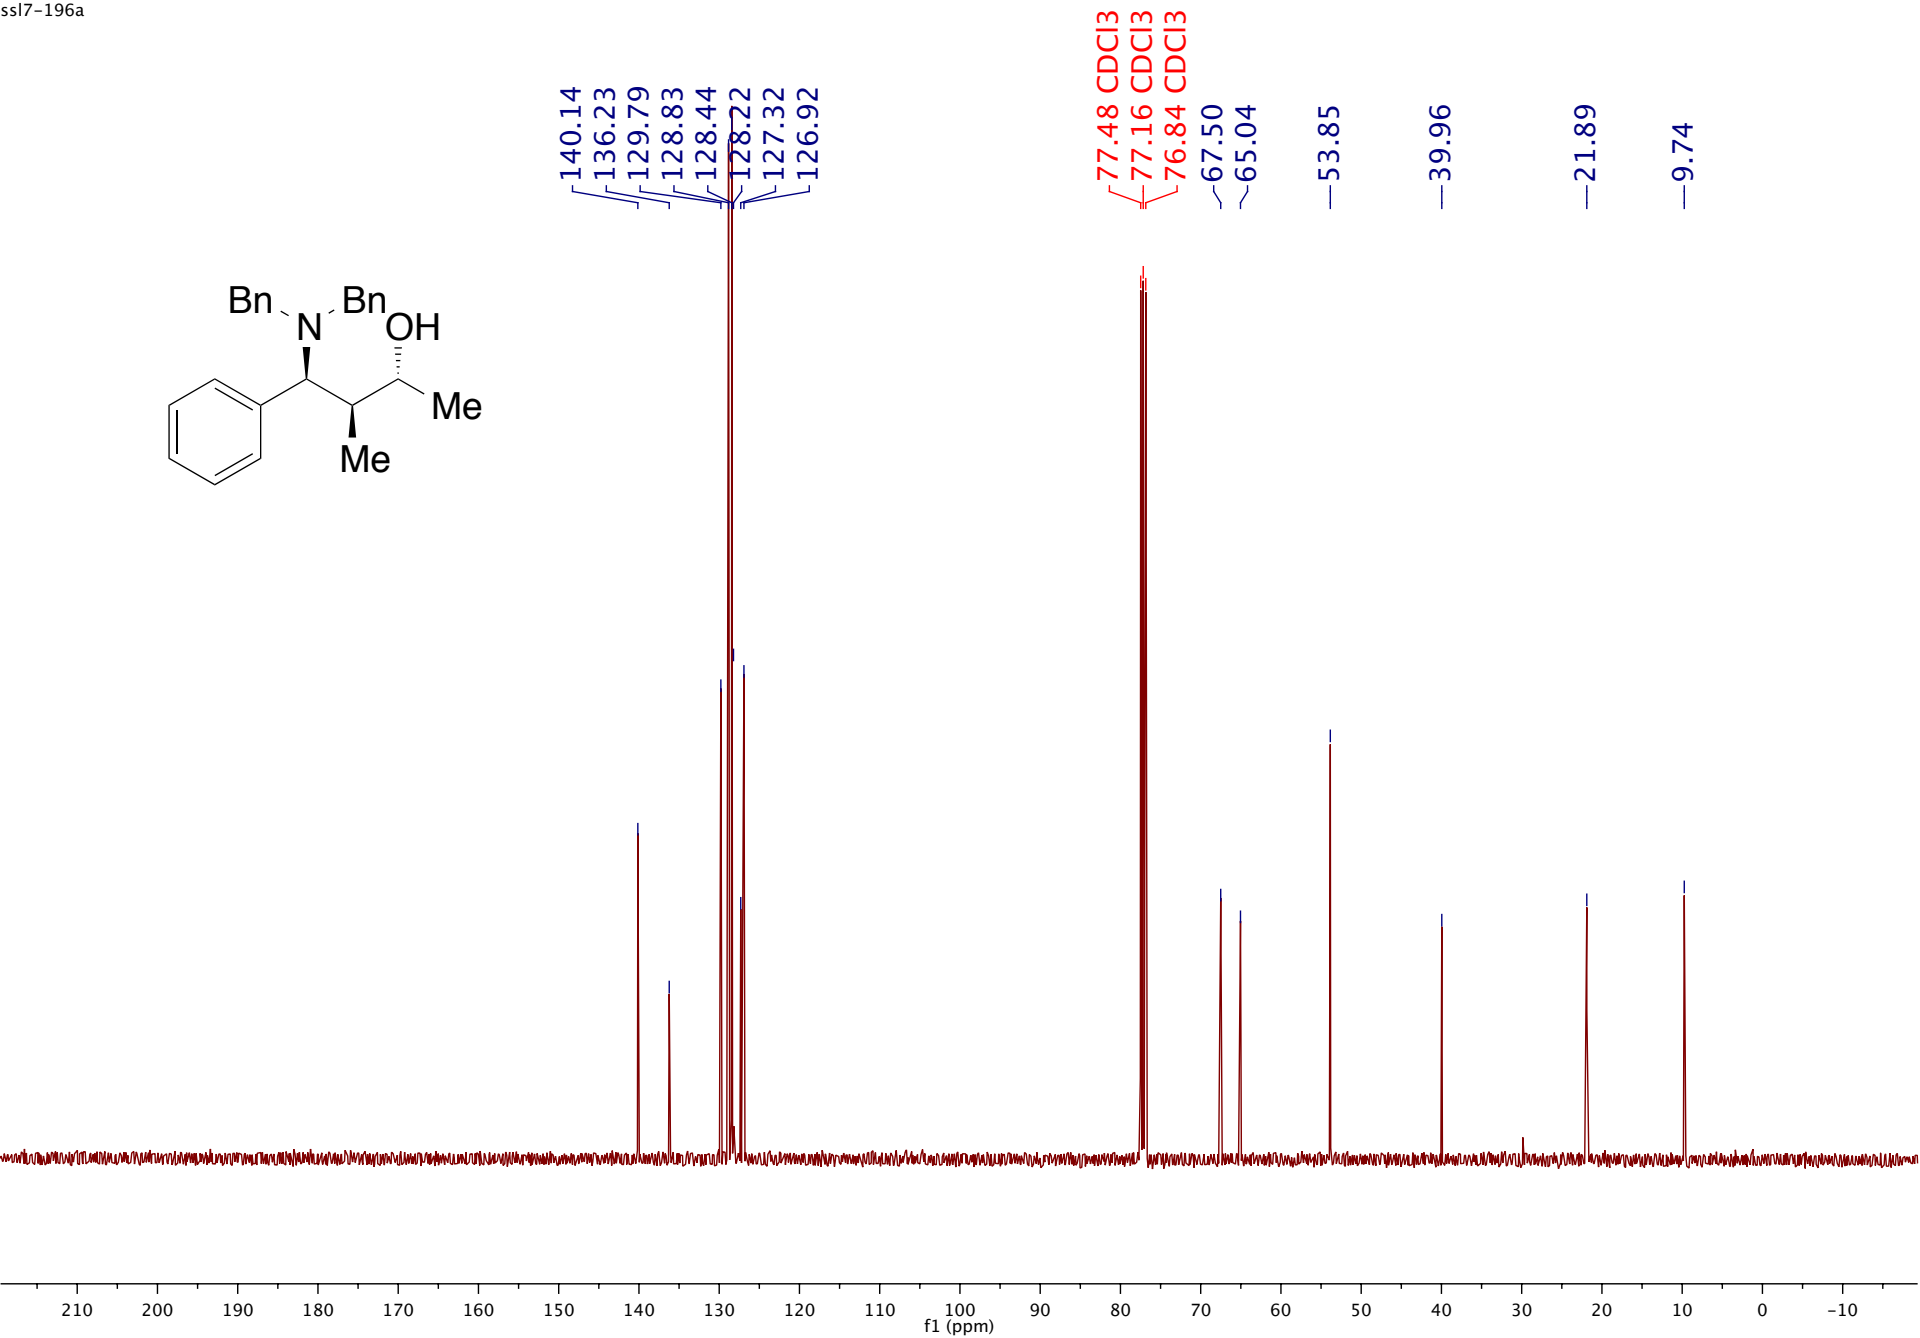

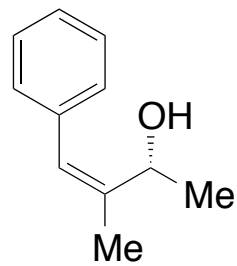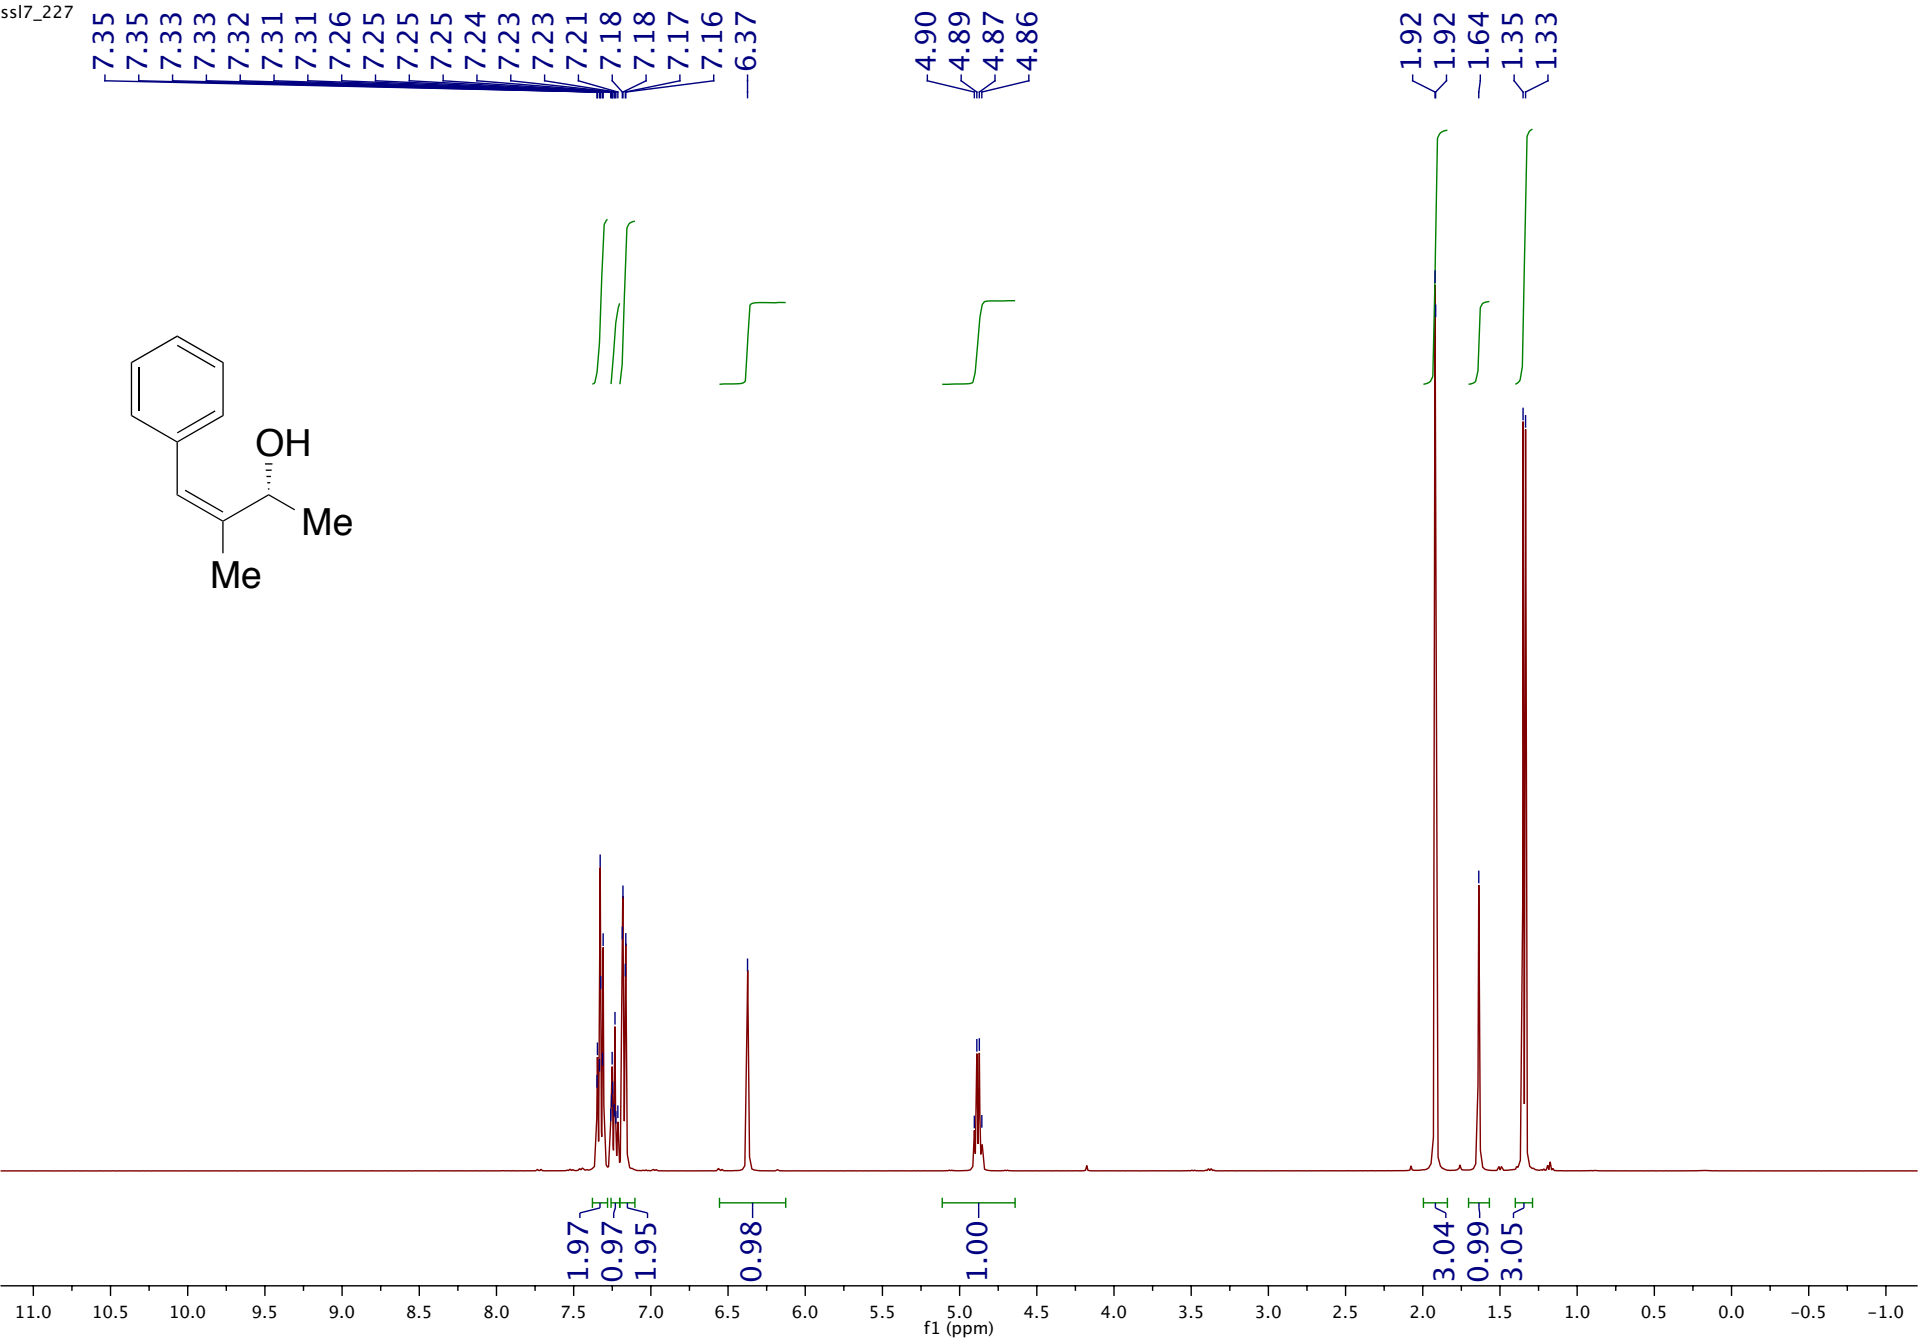

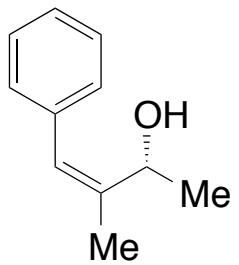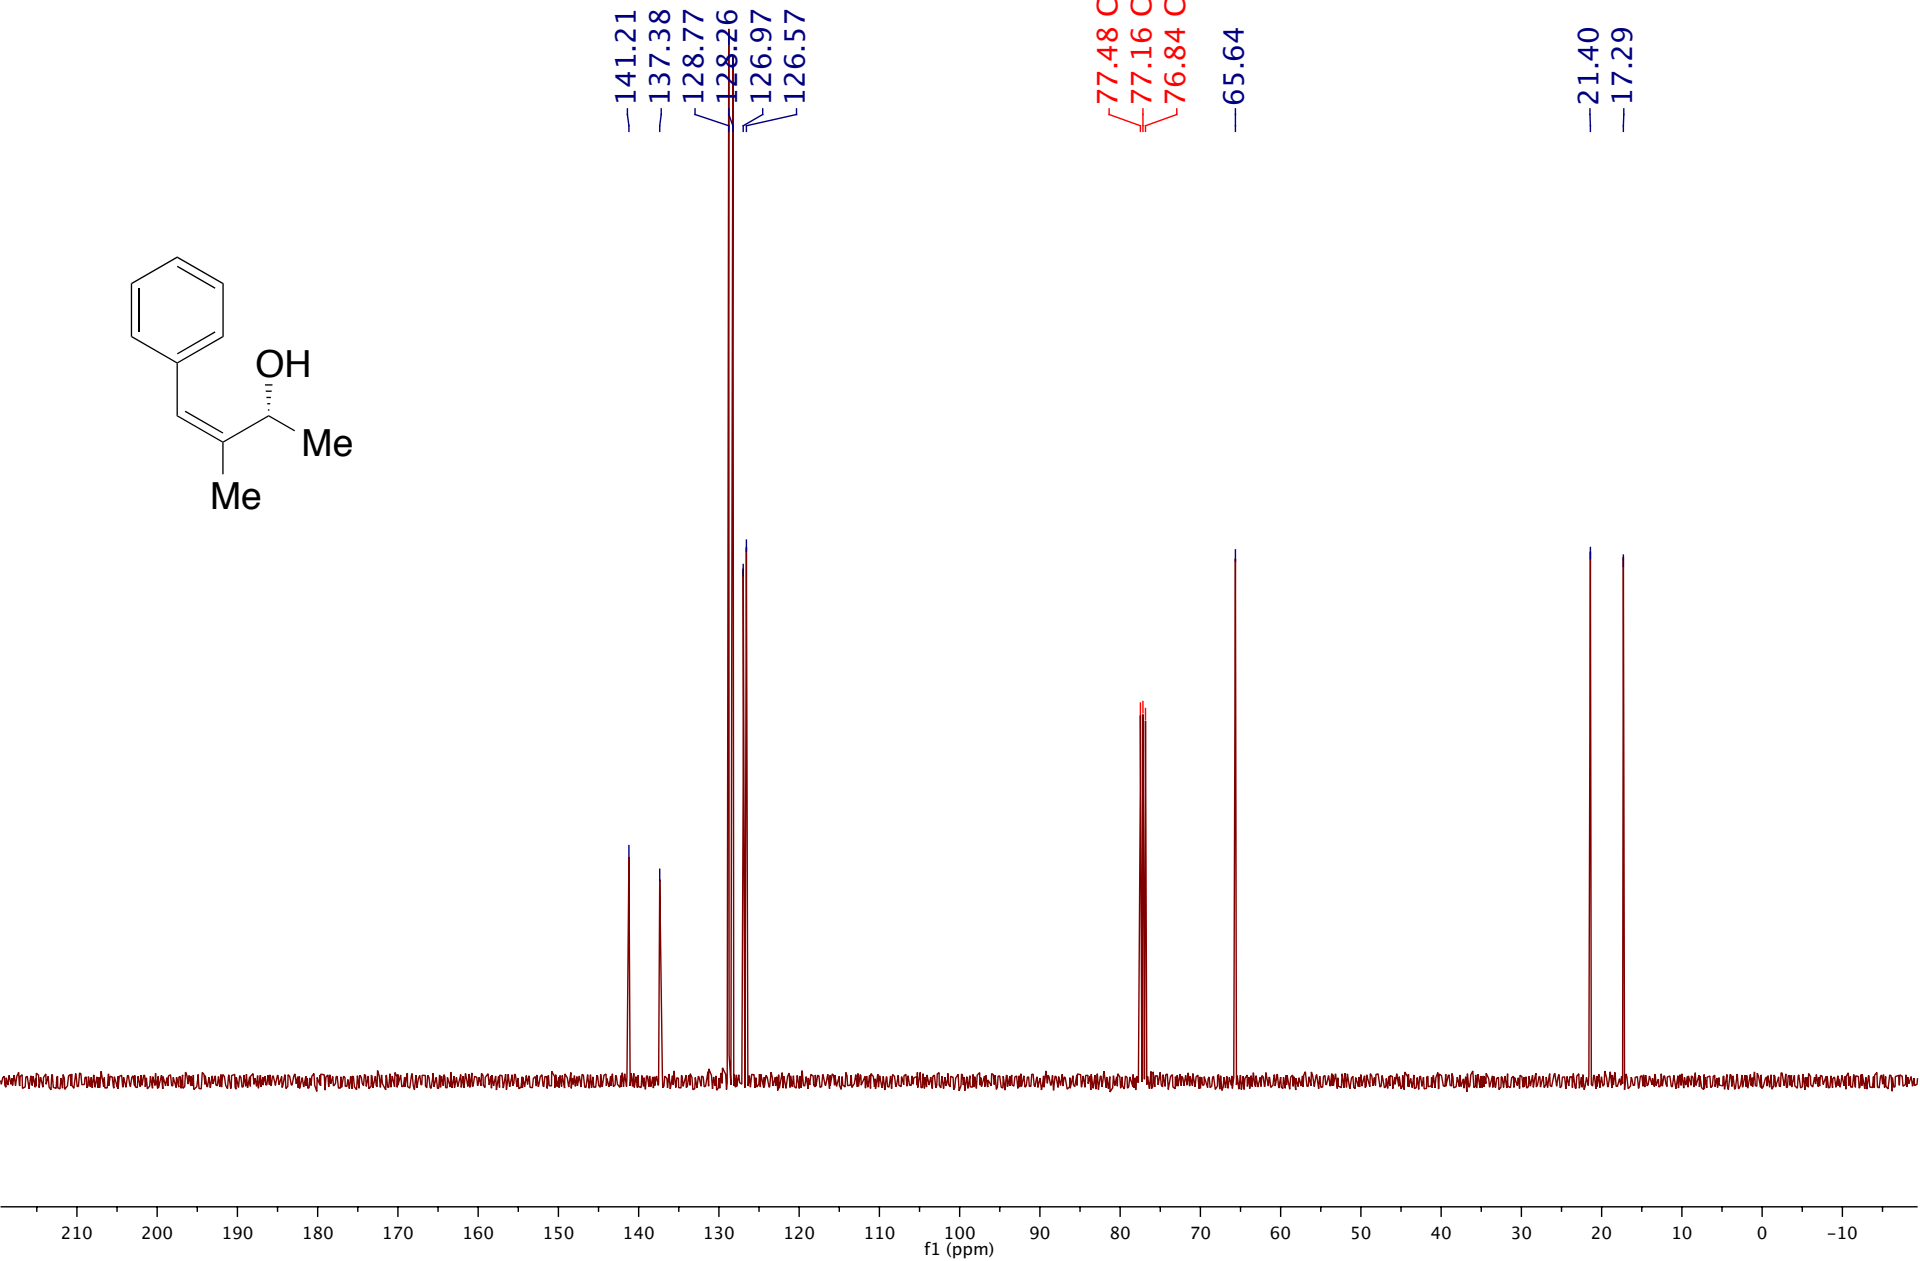

7.35  
7.33  
7.33  
7.32  
7.31  
7.31  
7.26  
7.25  
7.25  
7.25  
7.24  
7.23  
7.23  
7.22  
7.21  
7.19  
7.18  
7.16  
6.37

4.90  
4.89  
4.87  
4.86

1.92  
1.92  
1.73  
1.35  
1.33

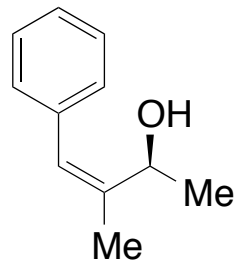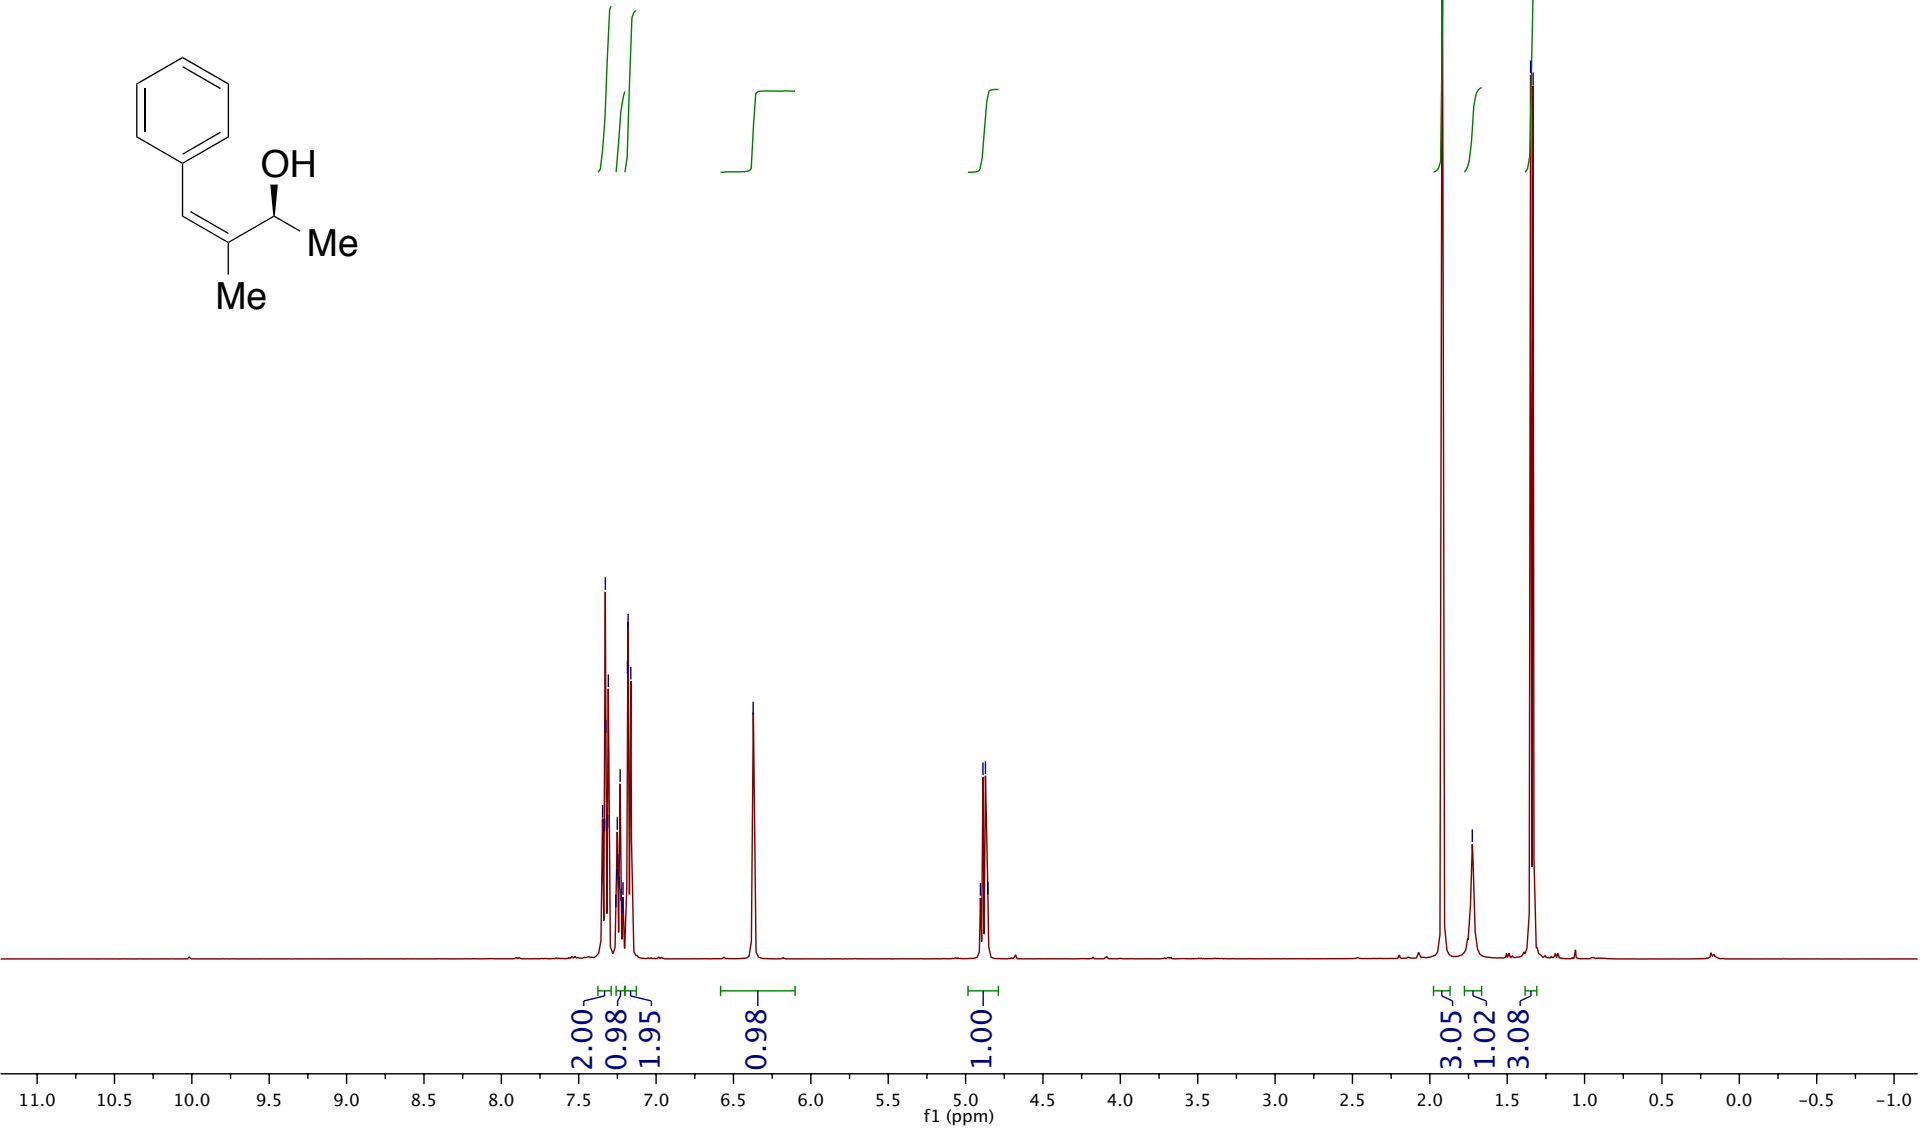

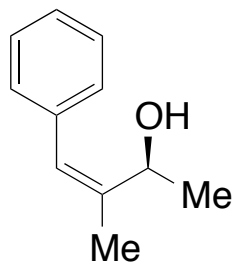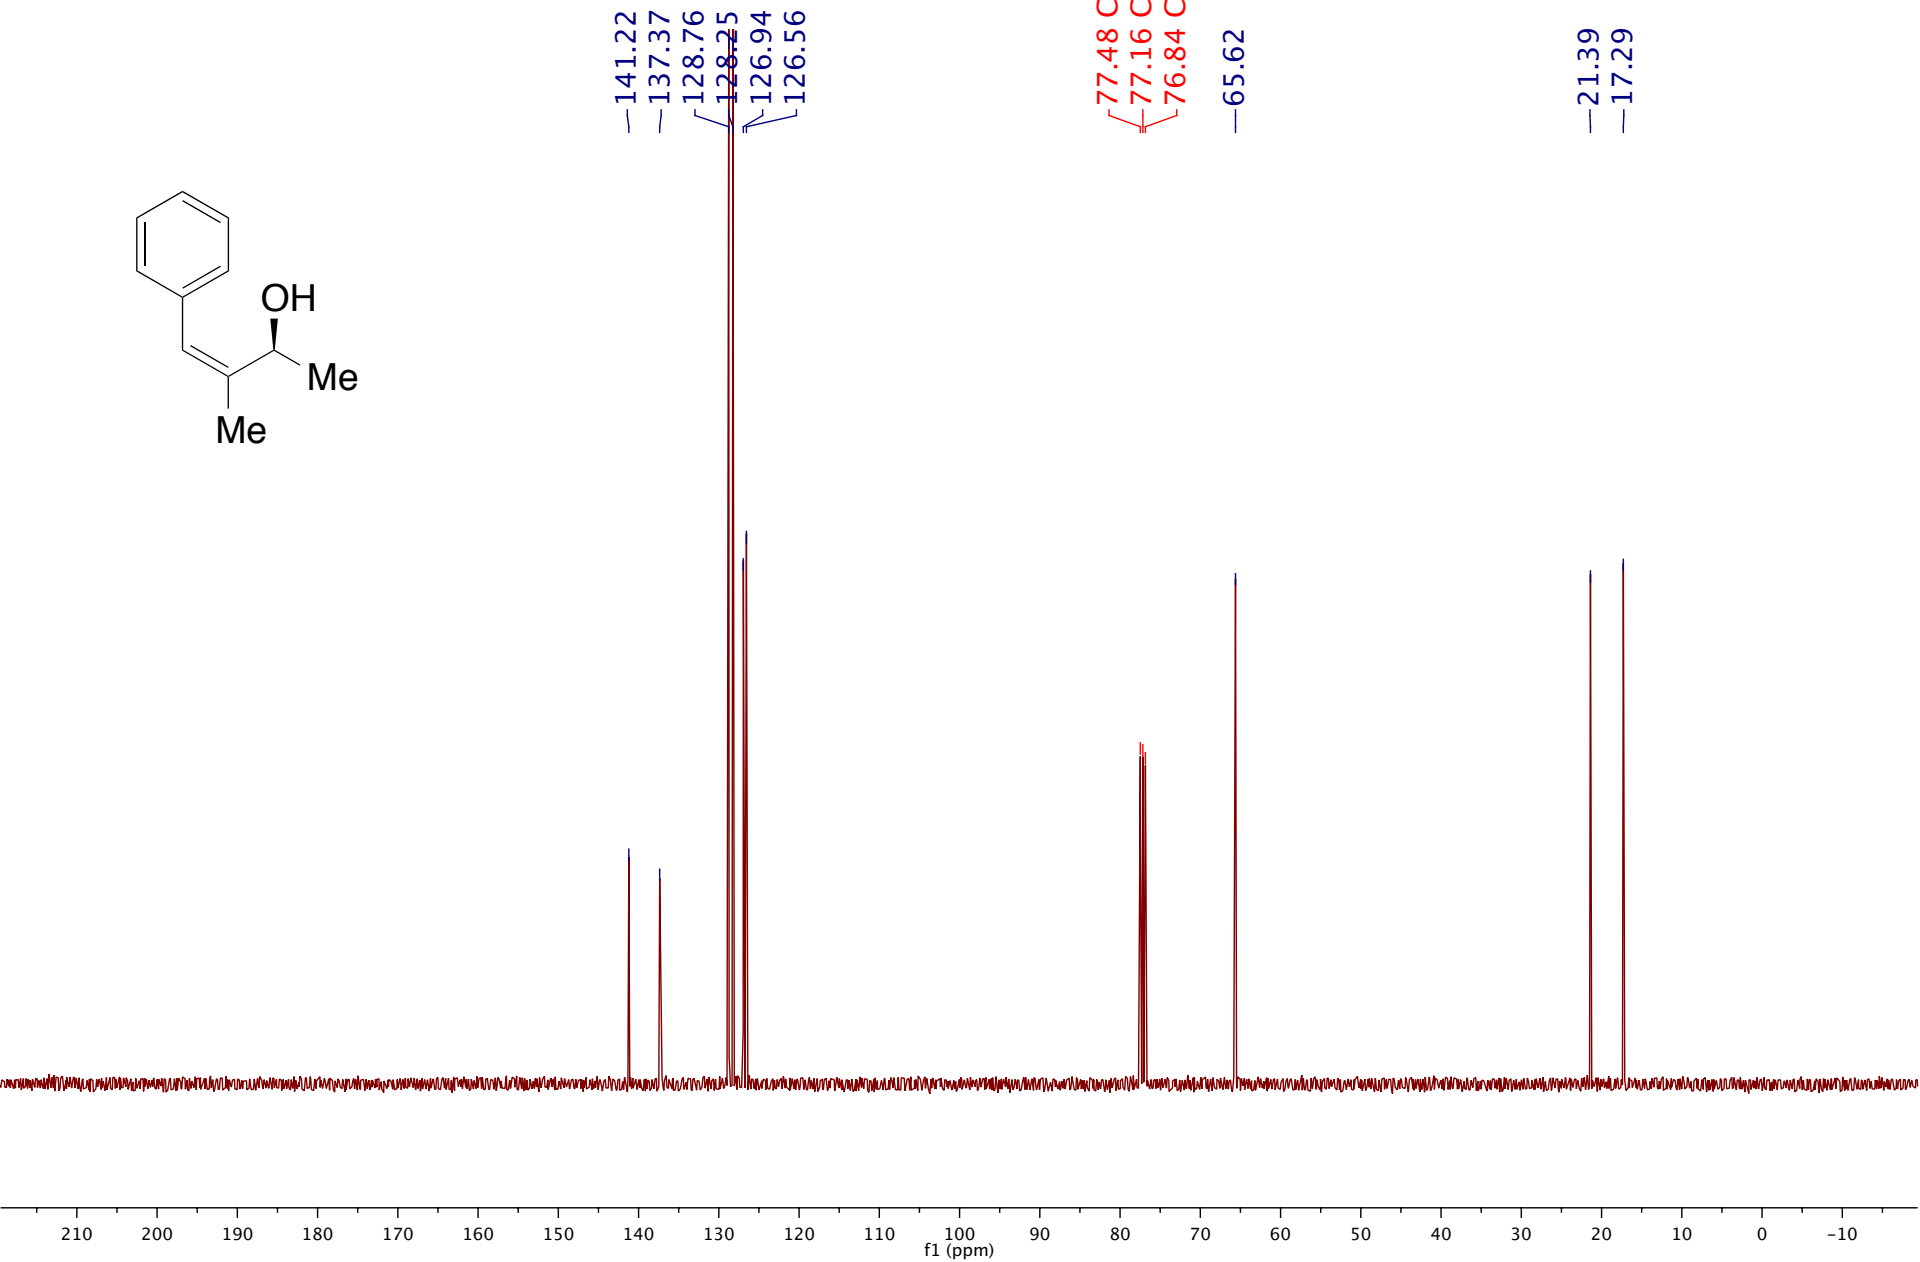

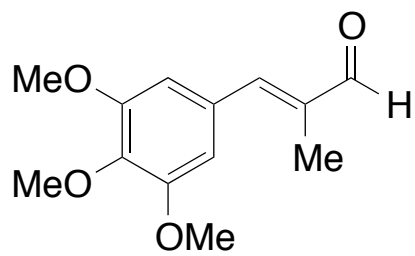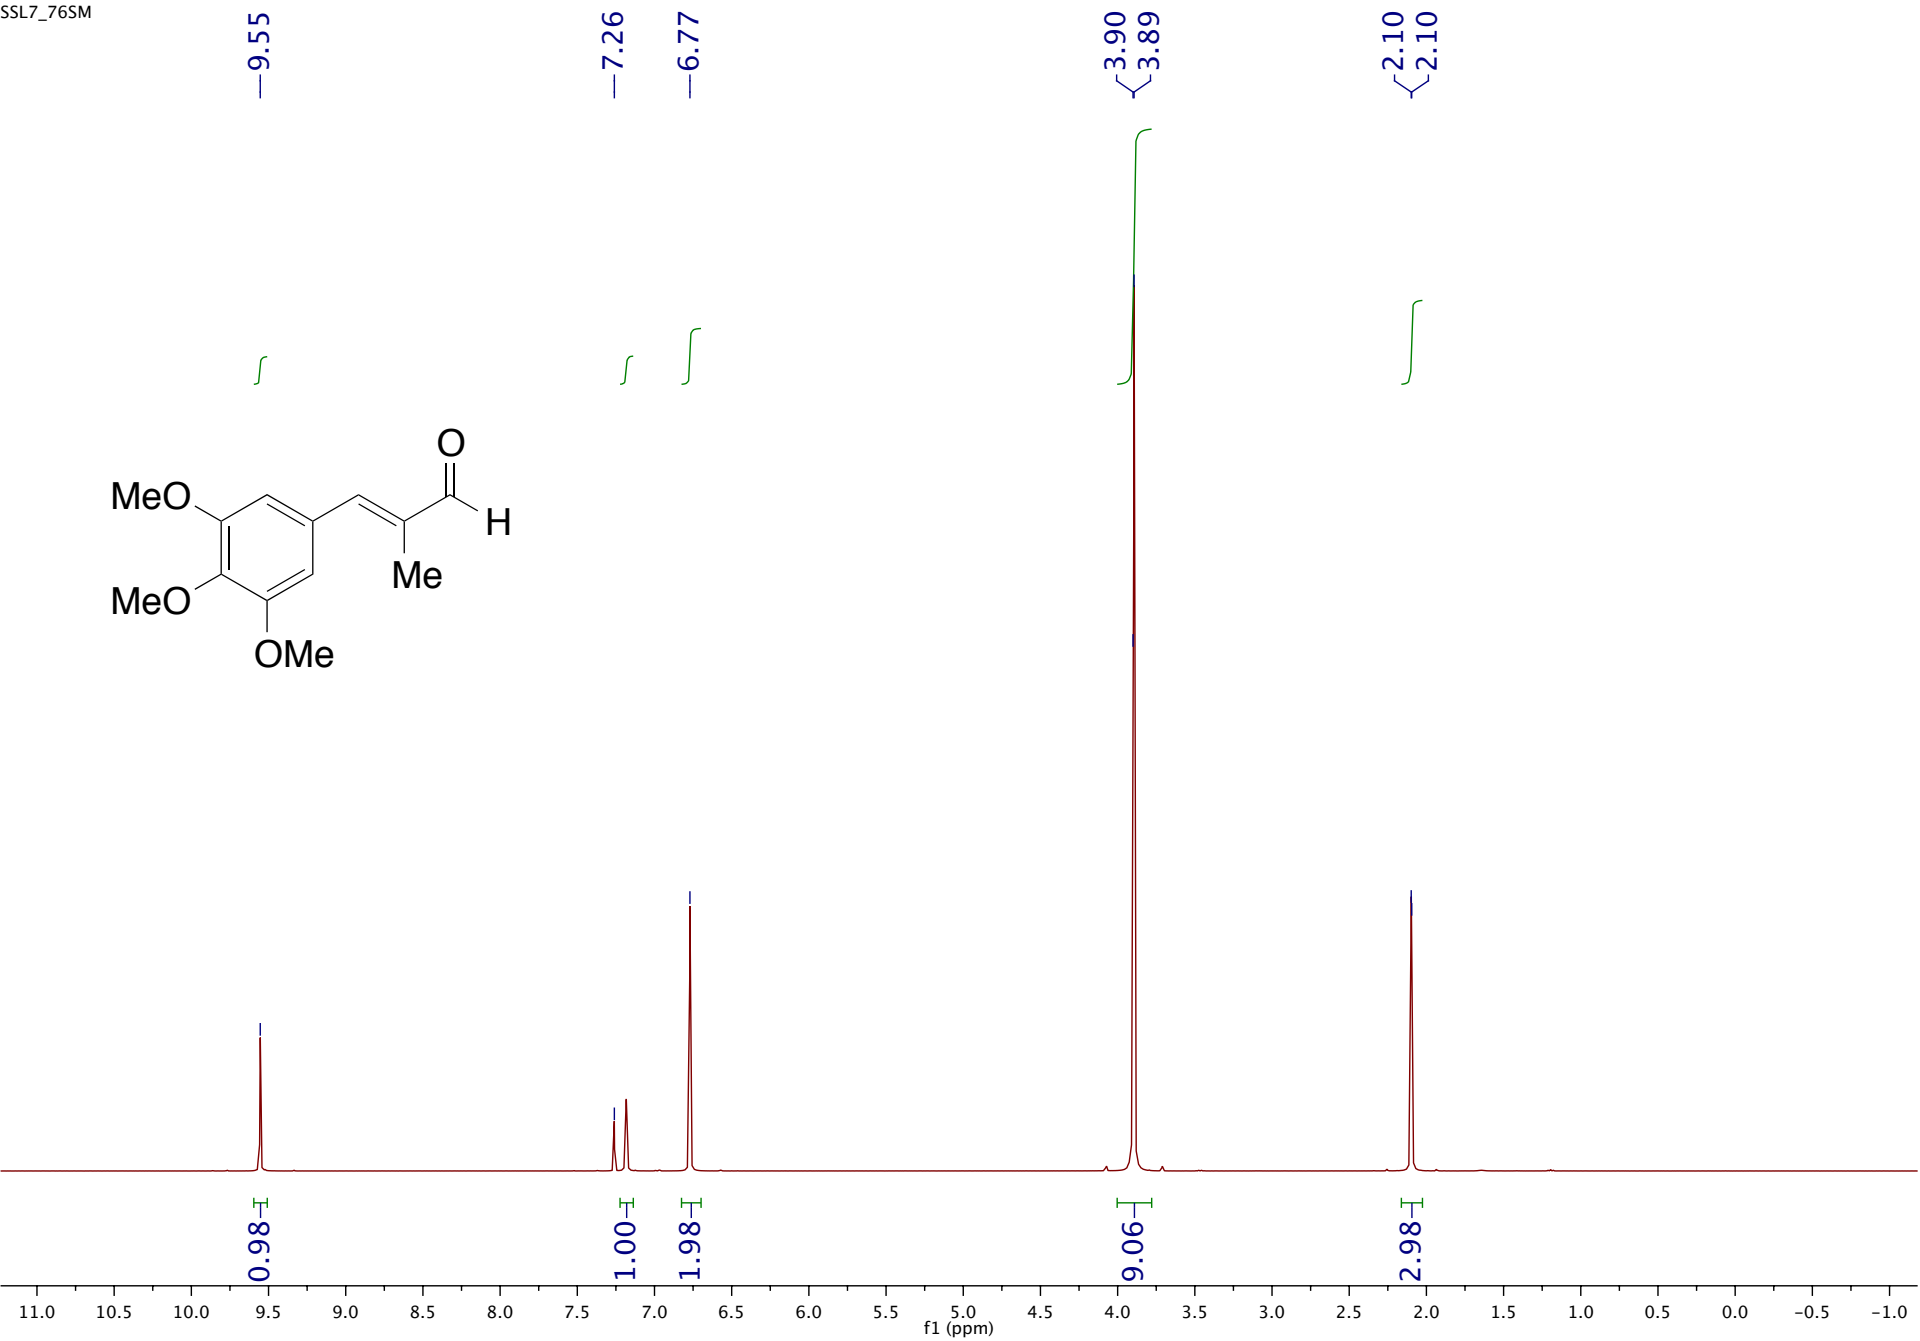



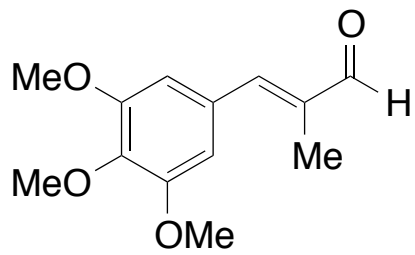

—195.44

~153.33

~150.04

~139.61

~137.65

~130.73

—107.70

77.48 CDCl<sub>3</sub>77.16 CDCl<sub>3</sub>76.84 CDCl<sub>3</sub>

—61.11

—56.34

—11.13

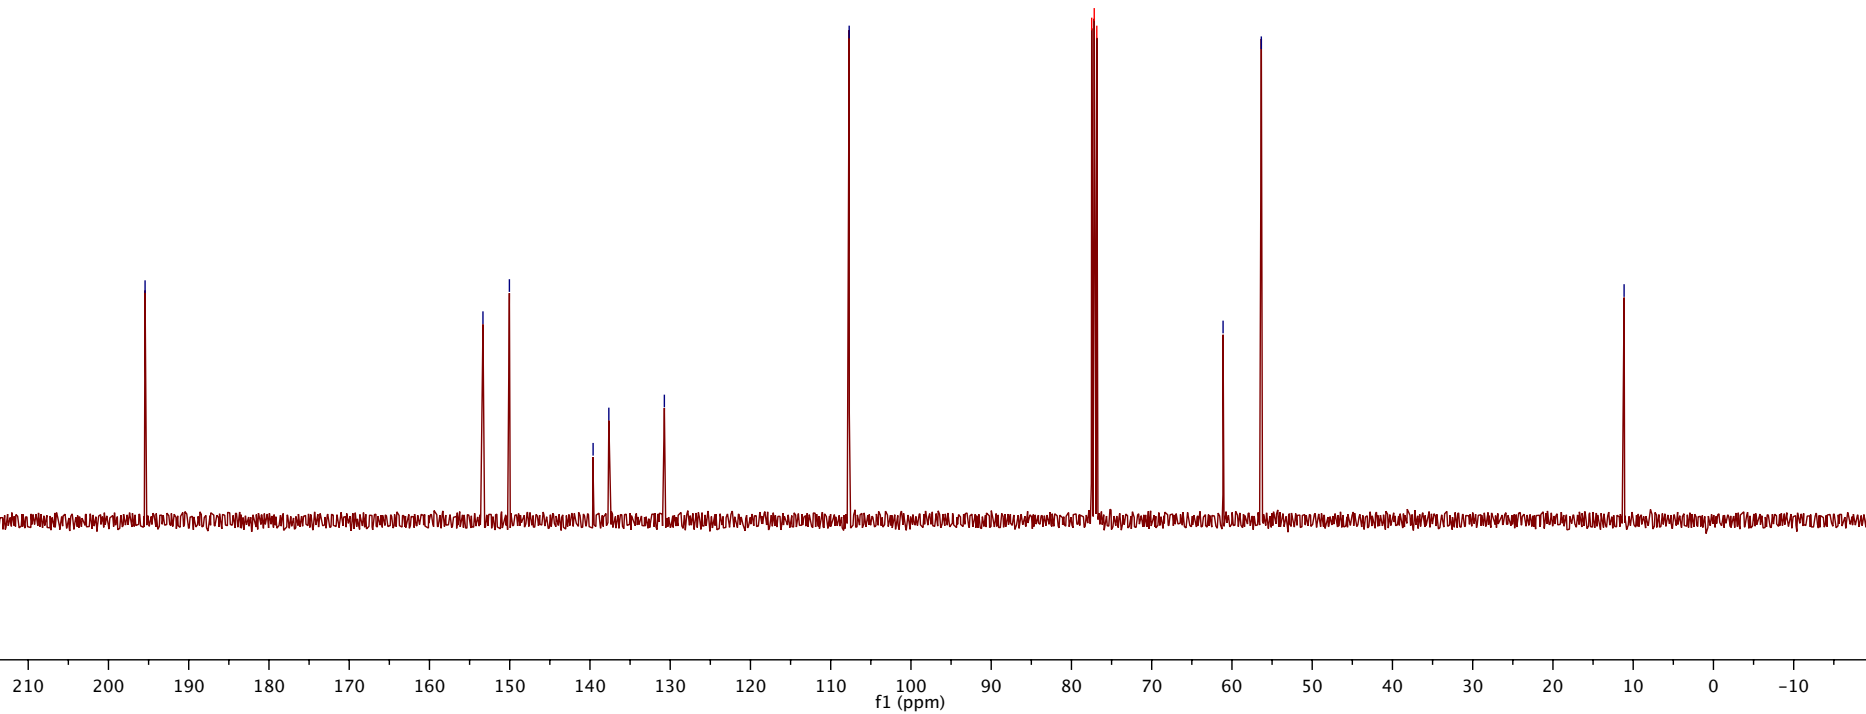

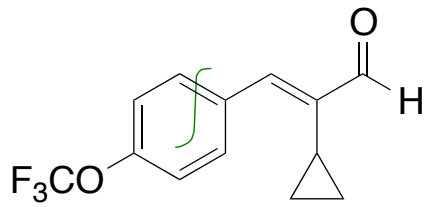

9.53  
9.53

7.70  
7.68  
7.29  
7.28  
7.26  
7.26  
7.24  
7.24  
7.24

1.70  
1.69  
1.68  
1.68  
1.67  
1.66  
1.66  
1.66  
1.65  
1.64  
1.64  
1.63  
1.62  
1.62

0.93  
0.92  
0.92  
0.91  
0.91  
0.90  
0.71  
0.70  
0.69  
0.69

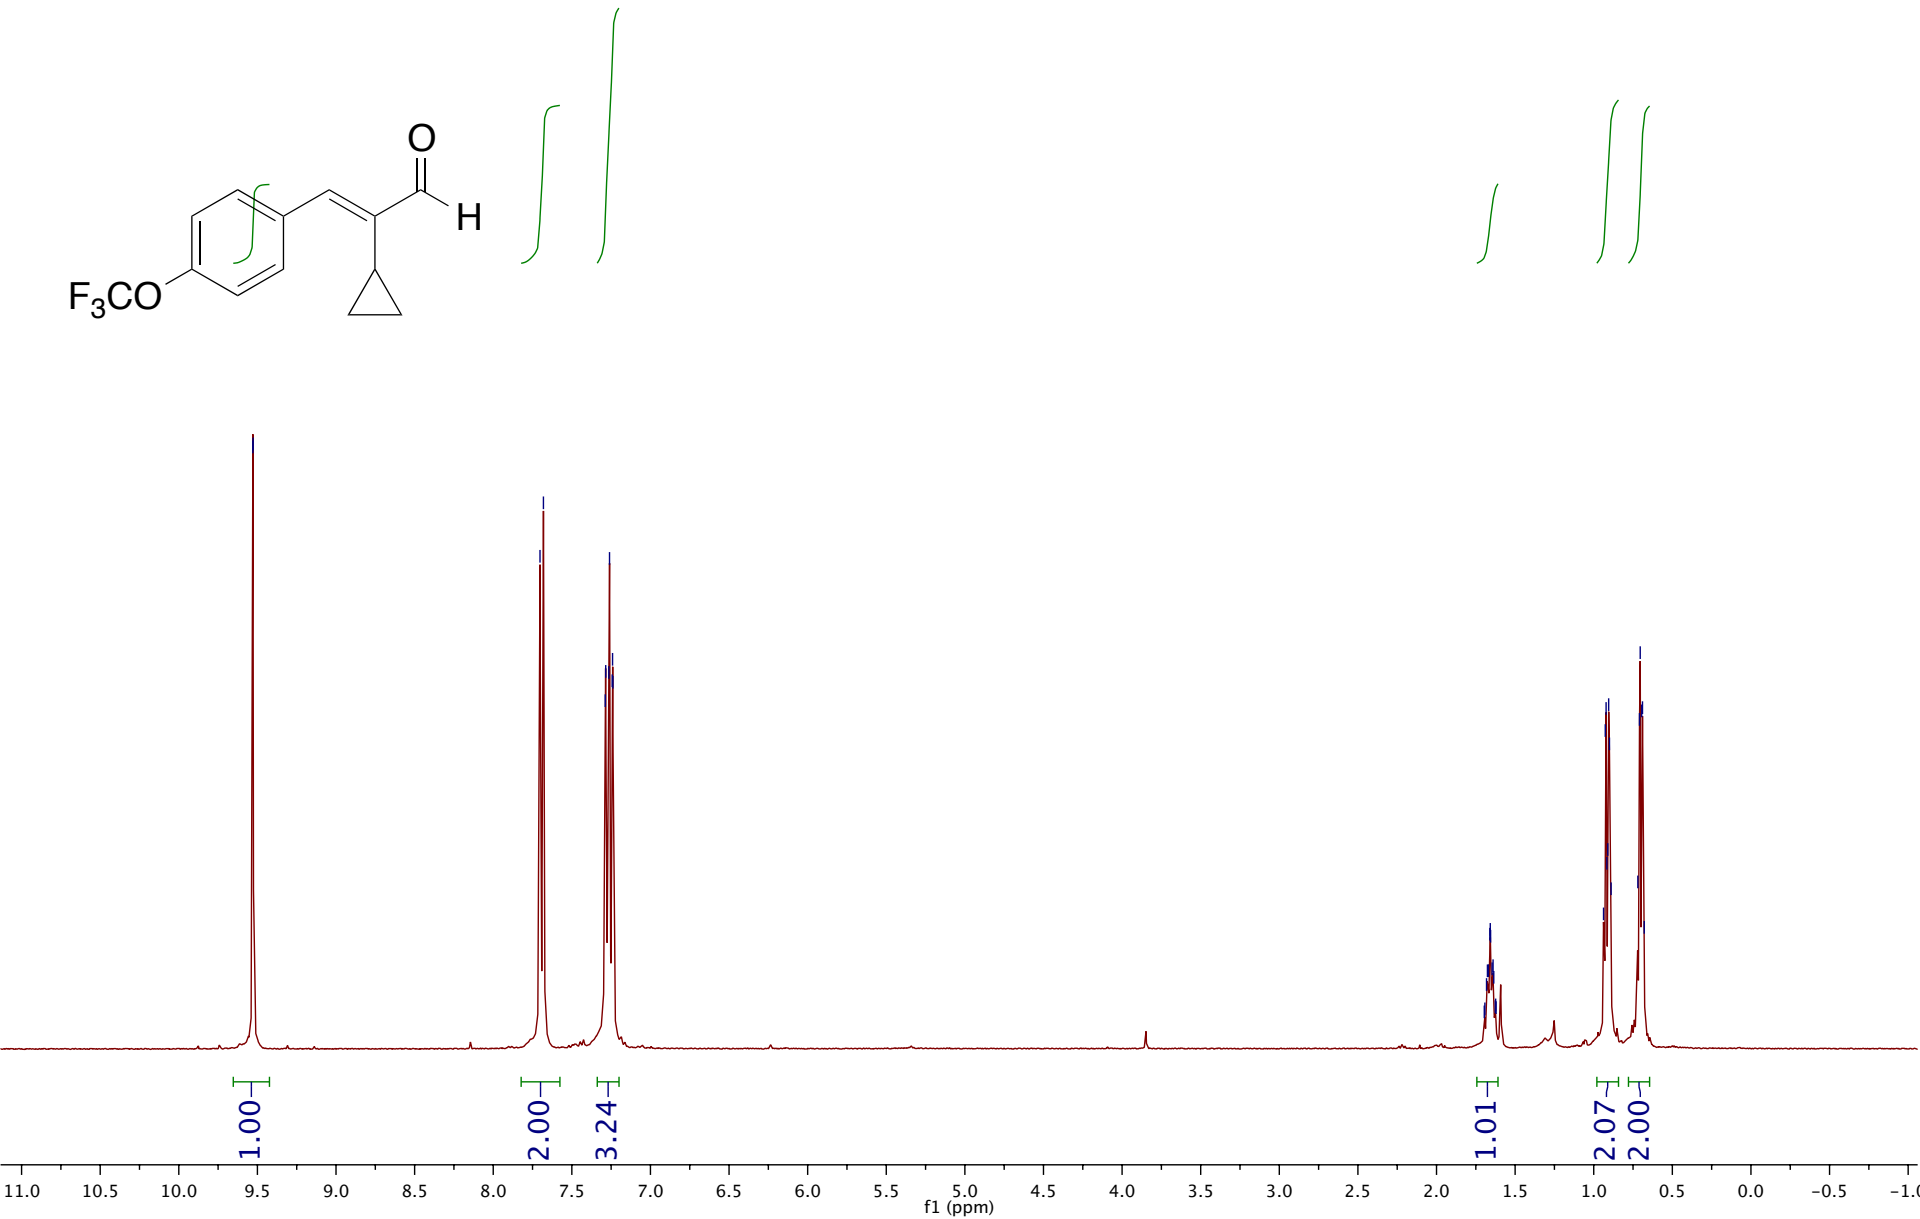

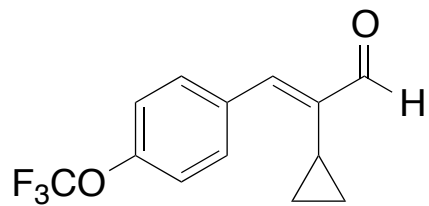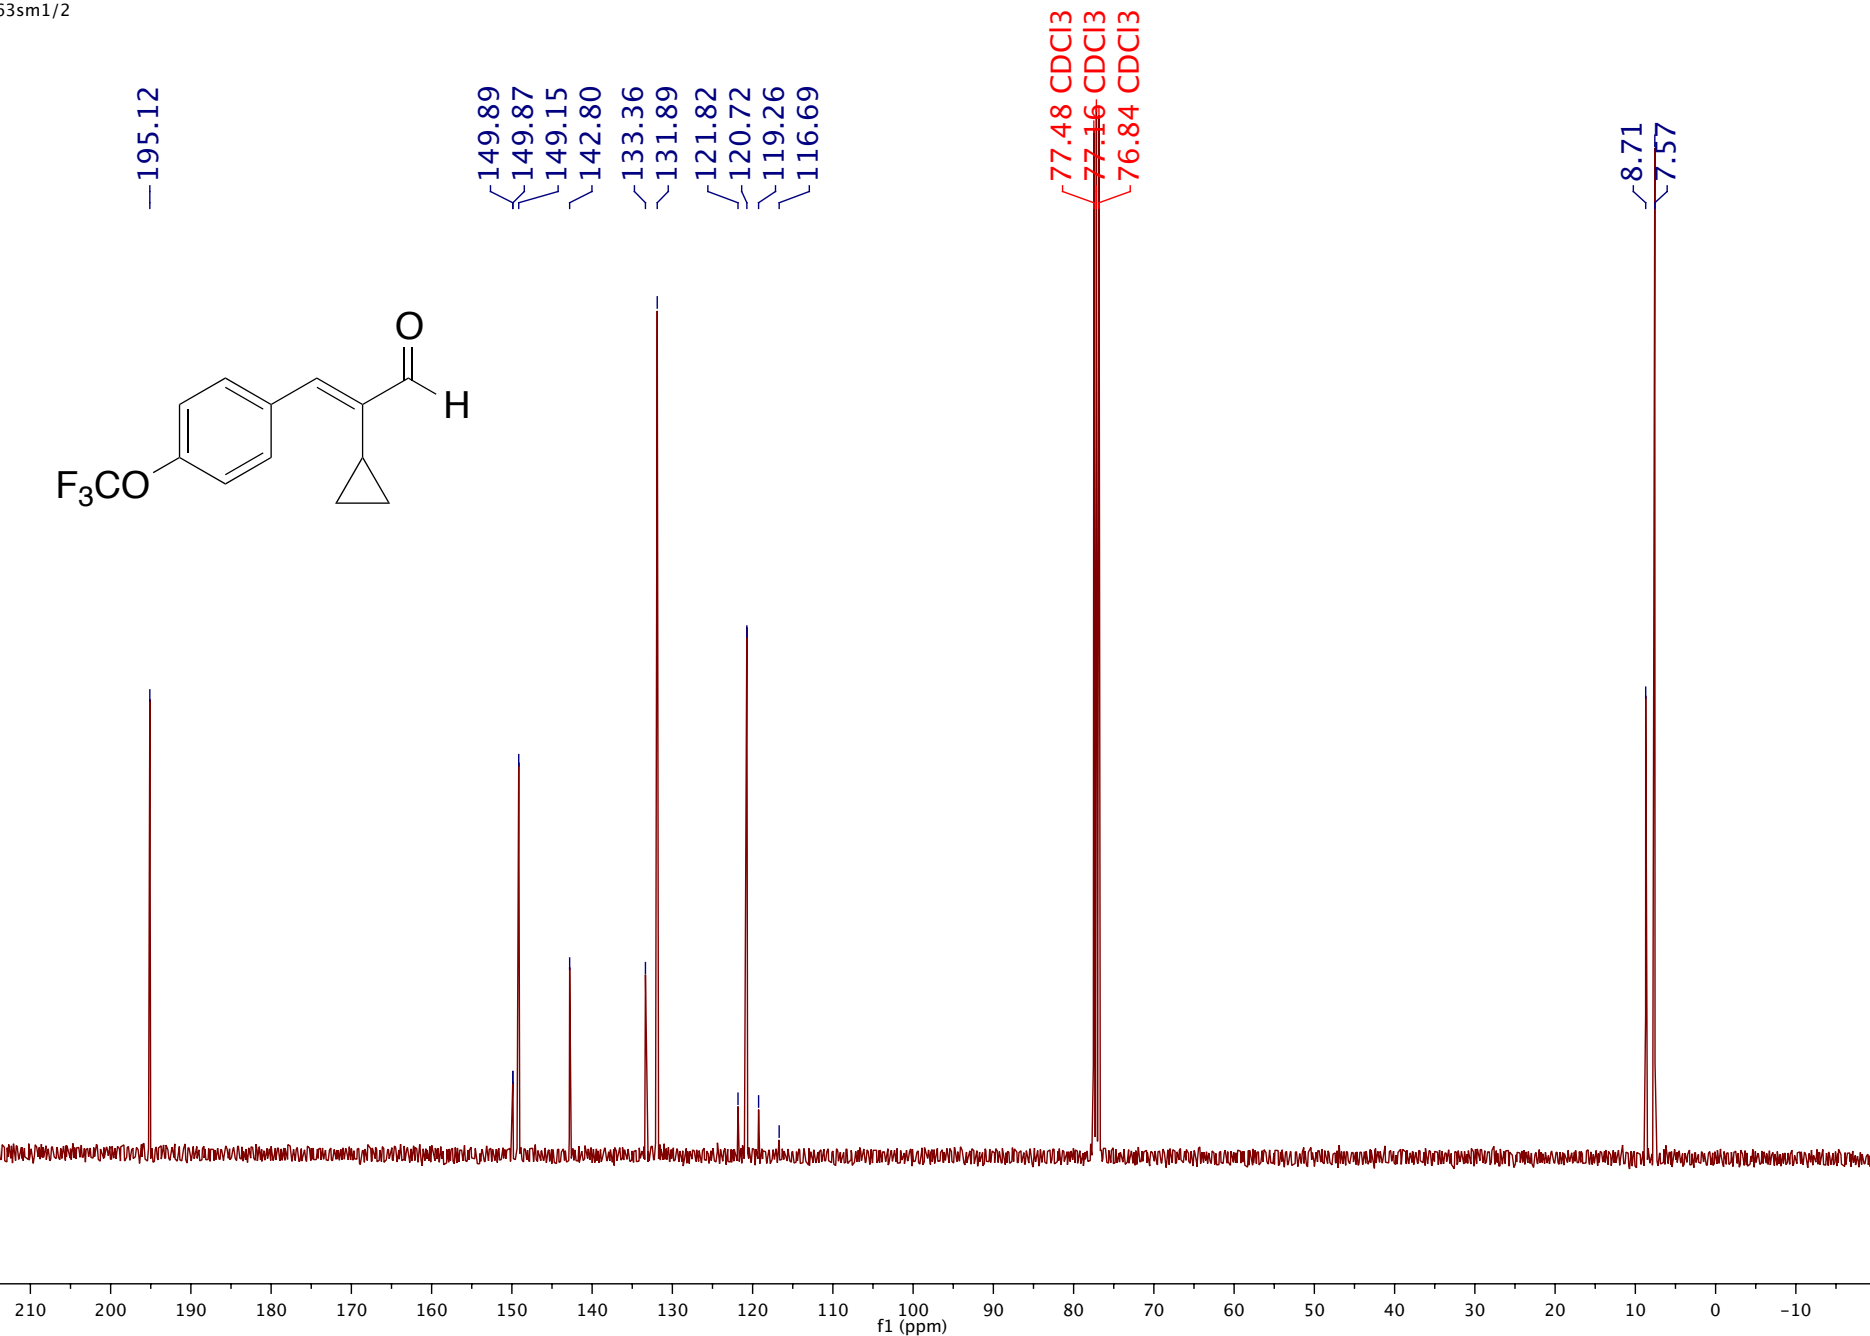

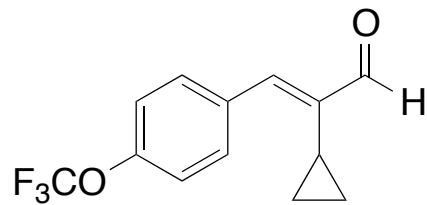

57.70

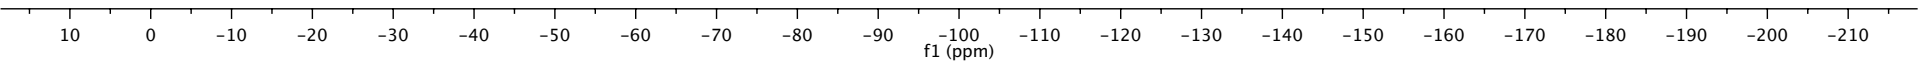

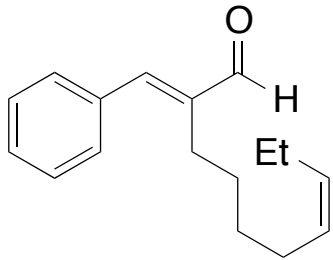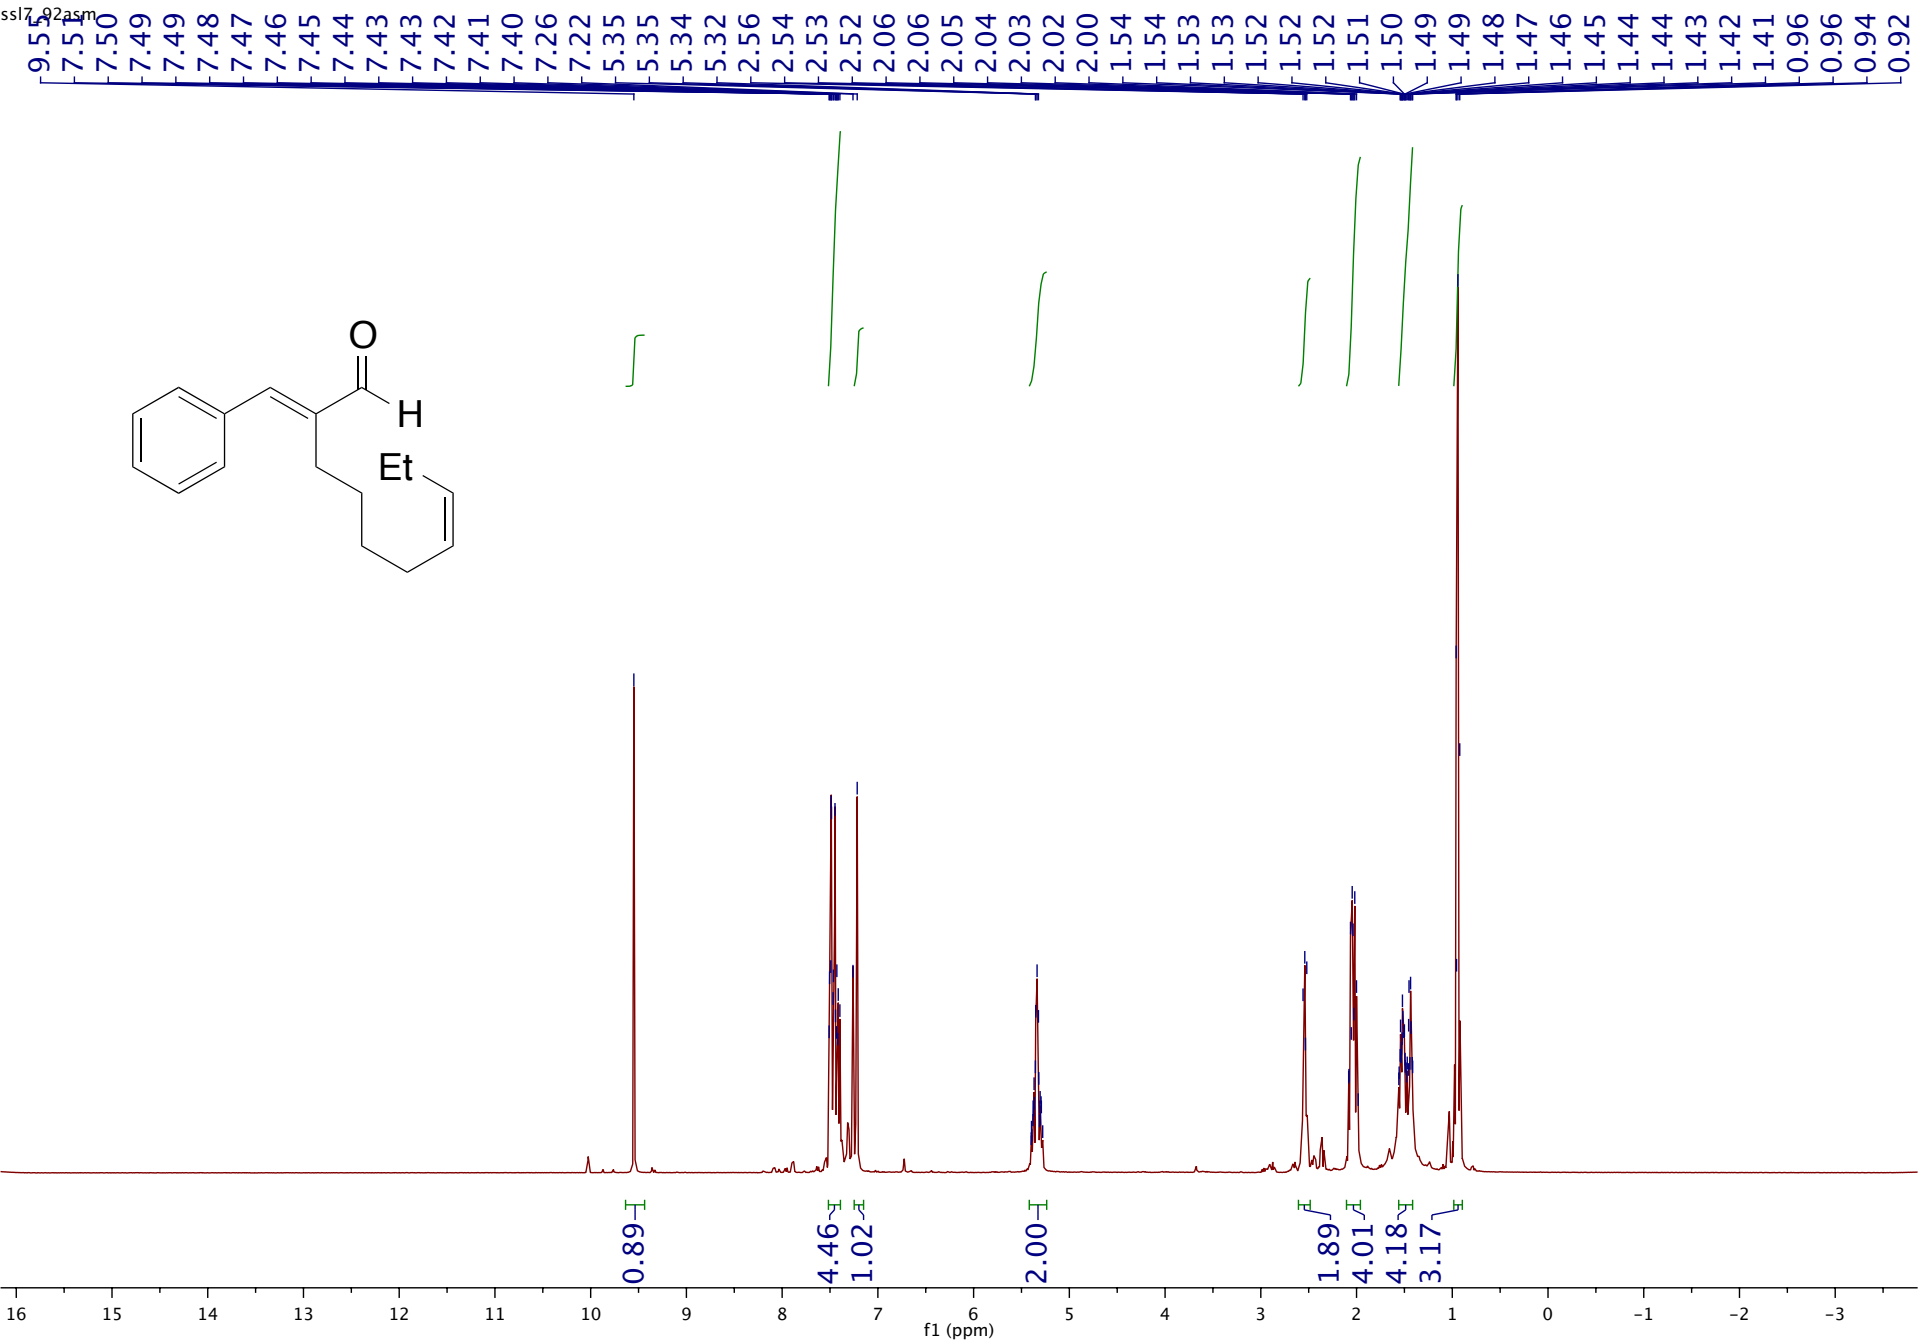

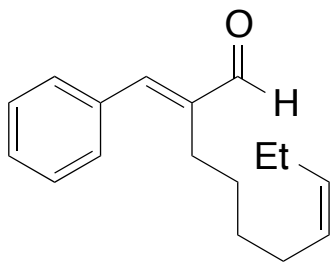

195.83

150.00  
143.34  
135.08  
132.01  
129.78  
129.68  
128.93

77.48 CDCI3  
77.16 CDCI3  
76.84 CDCI3

30.09  
28.04  
26.93  
24.82  
20.66  
14.49

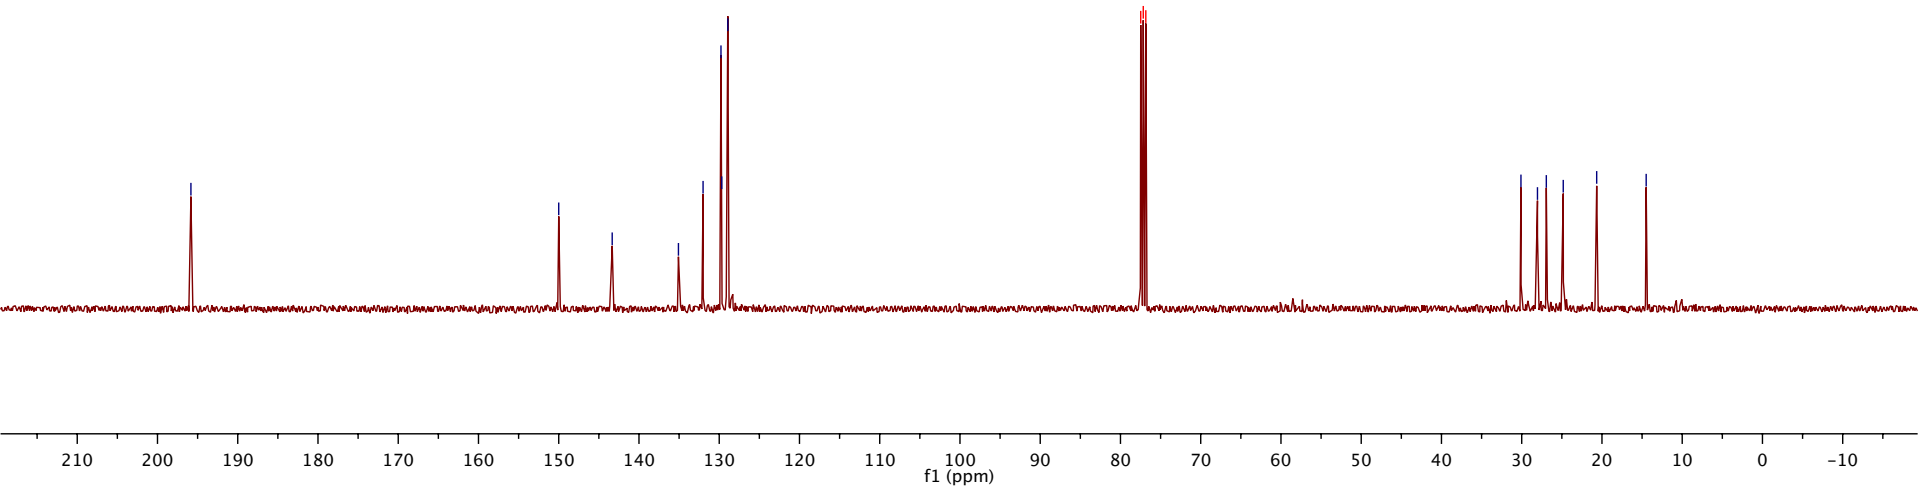

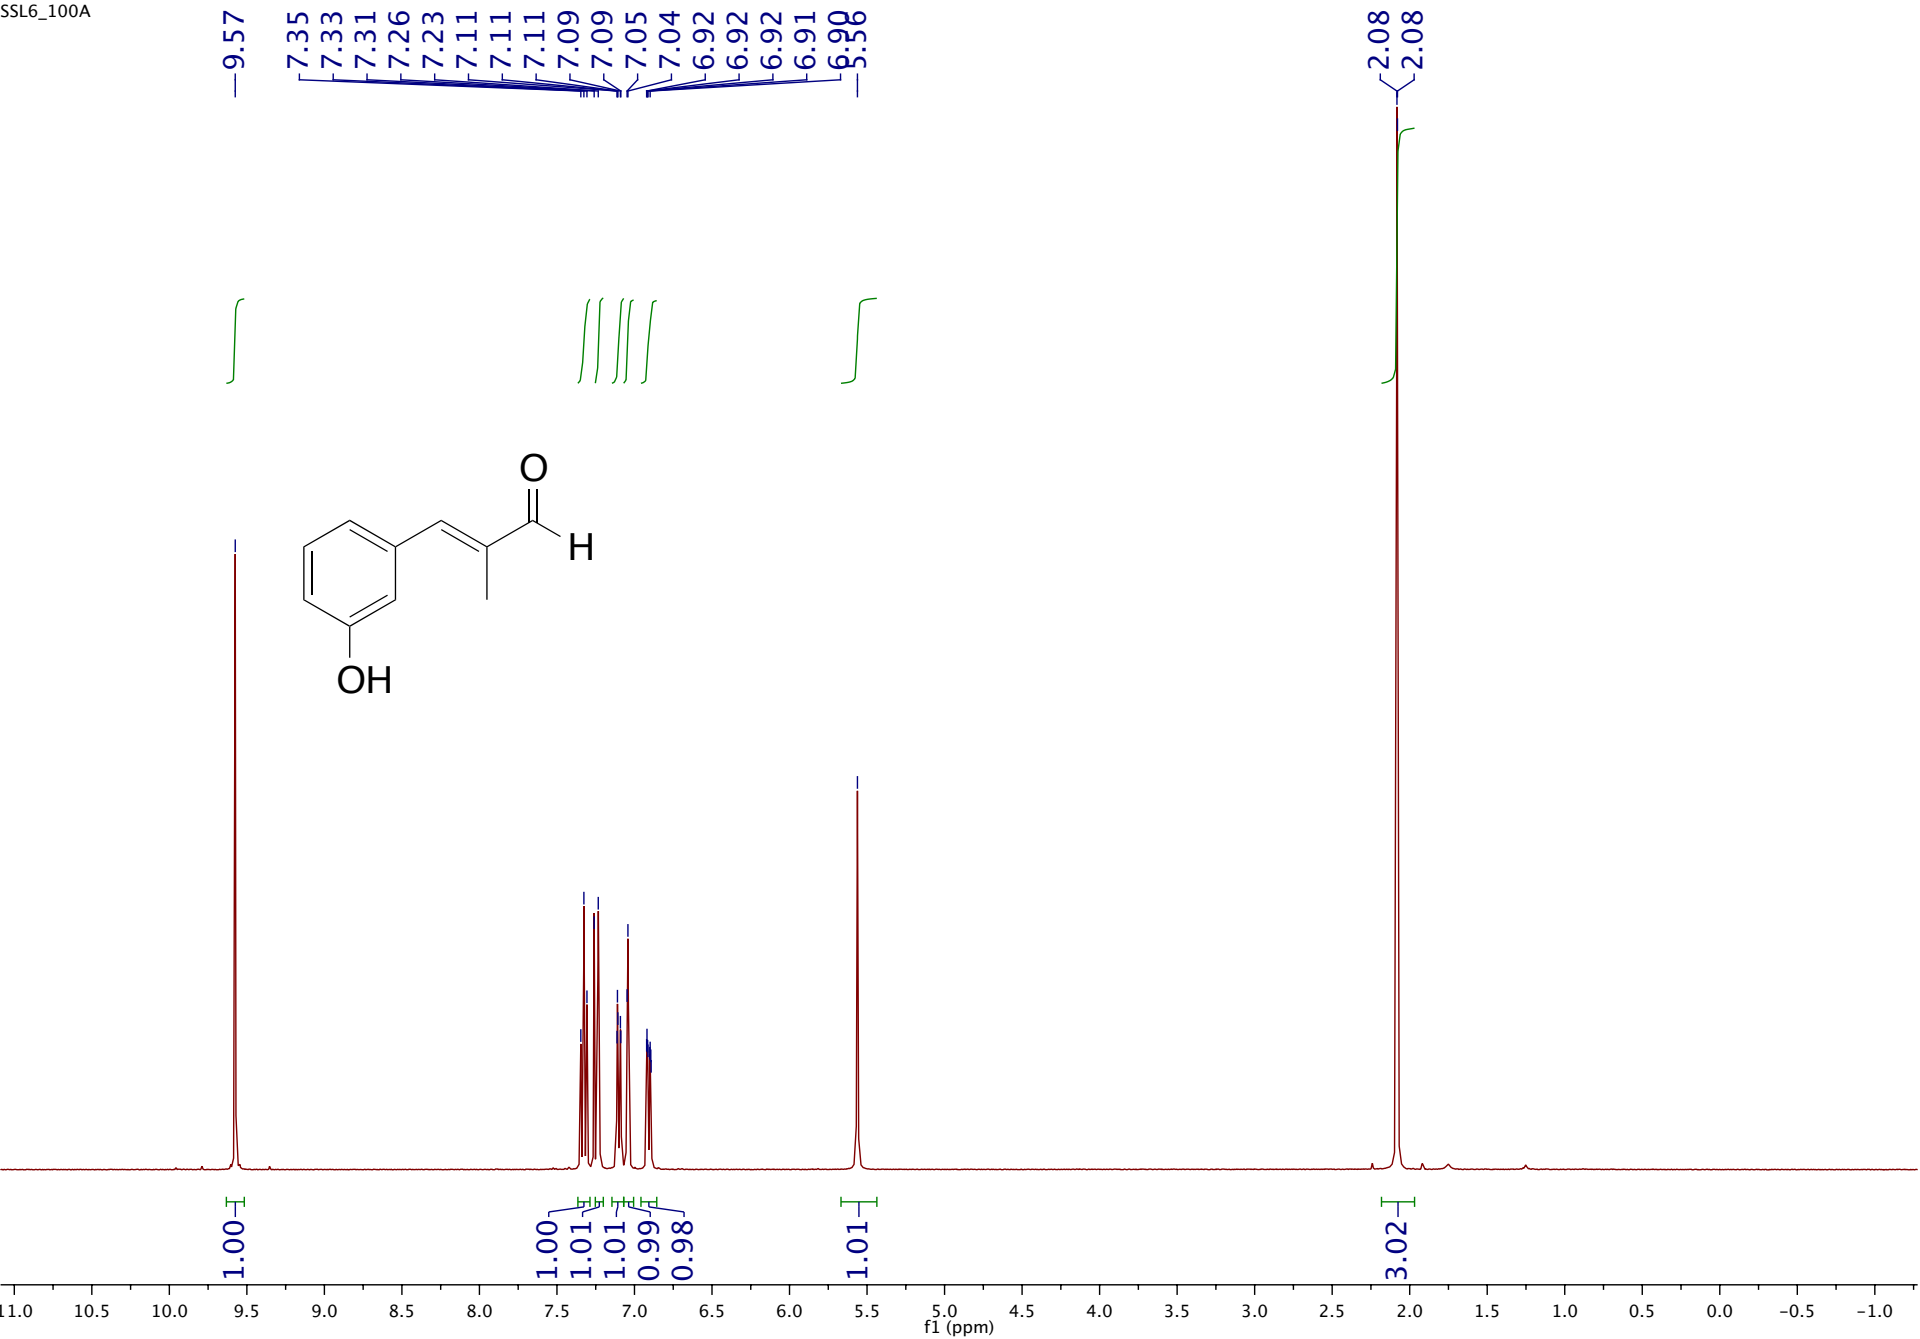

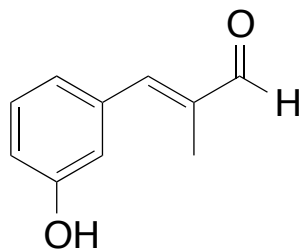

—196.14

—155.99

—150.12

~138.69

~136.70

~130.09

~122.88

~116.96

~116.74

77.48 CDCl3

77.16 CDCl3

76.84 CDCl3

—11.14

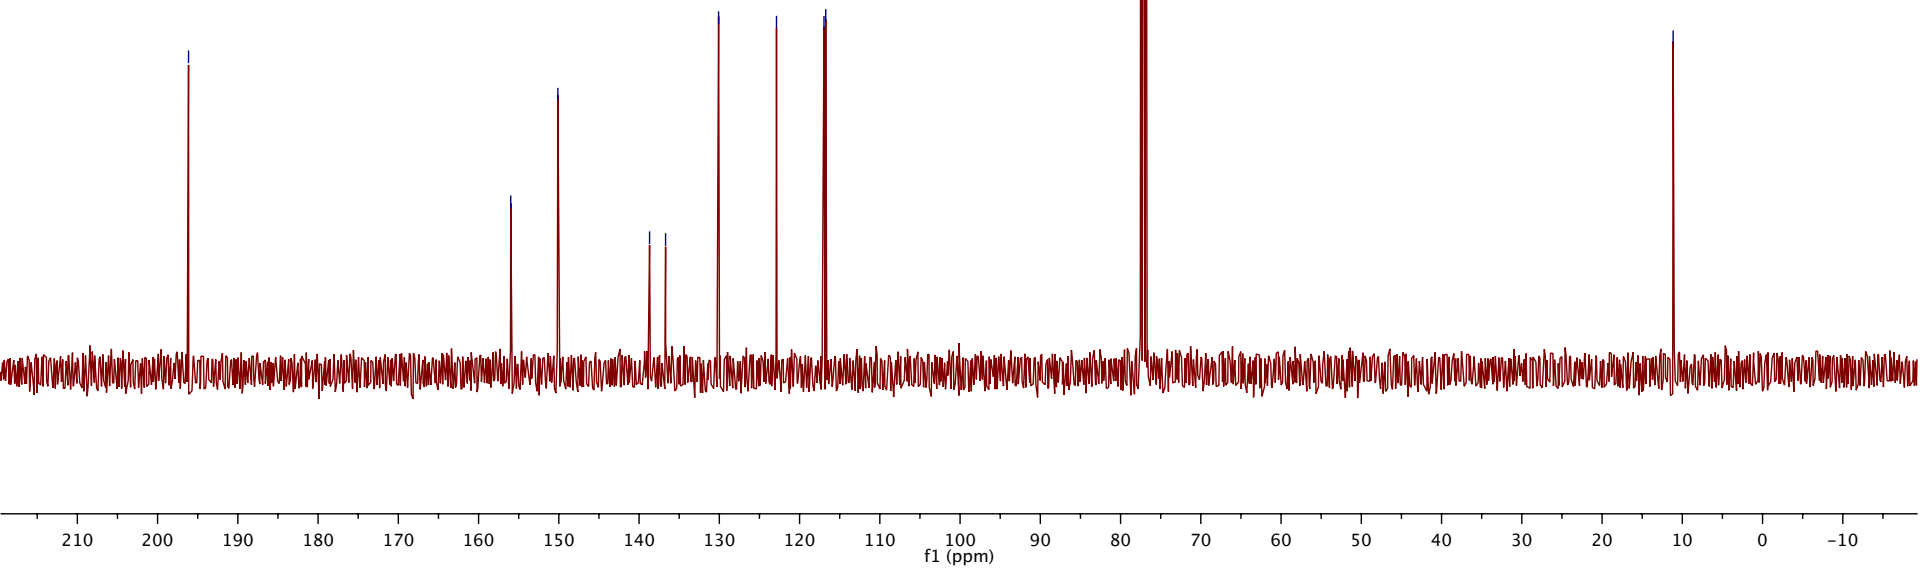



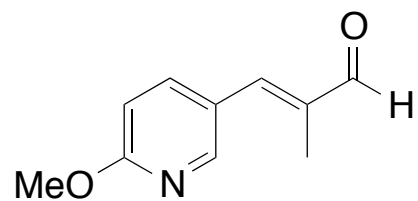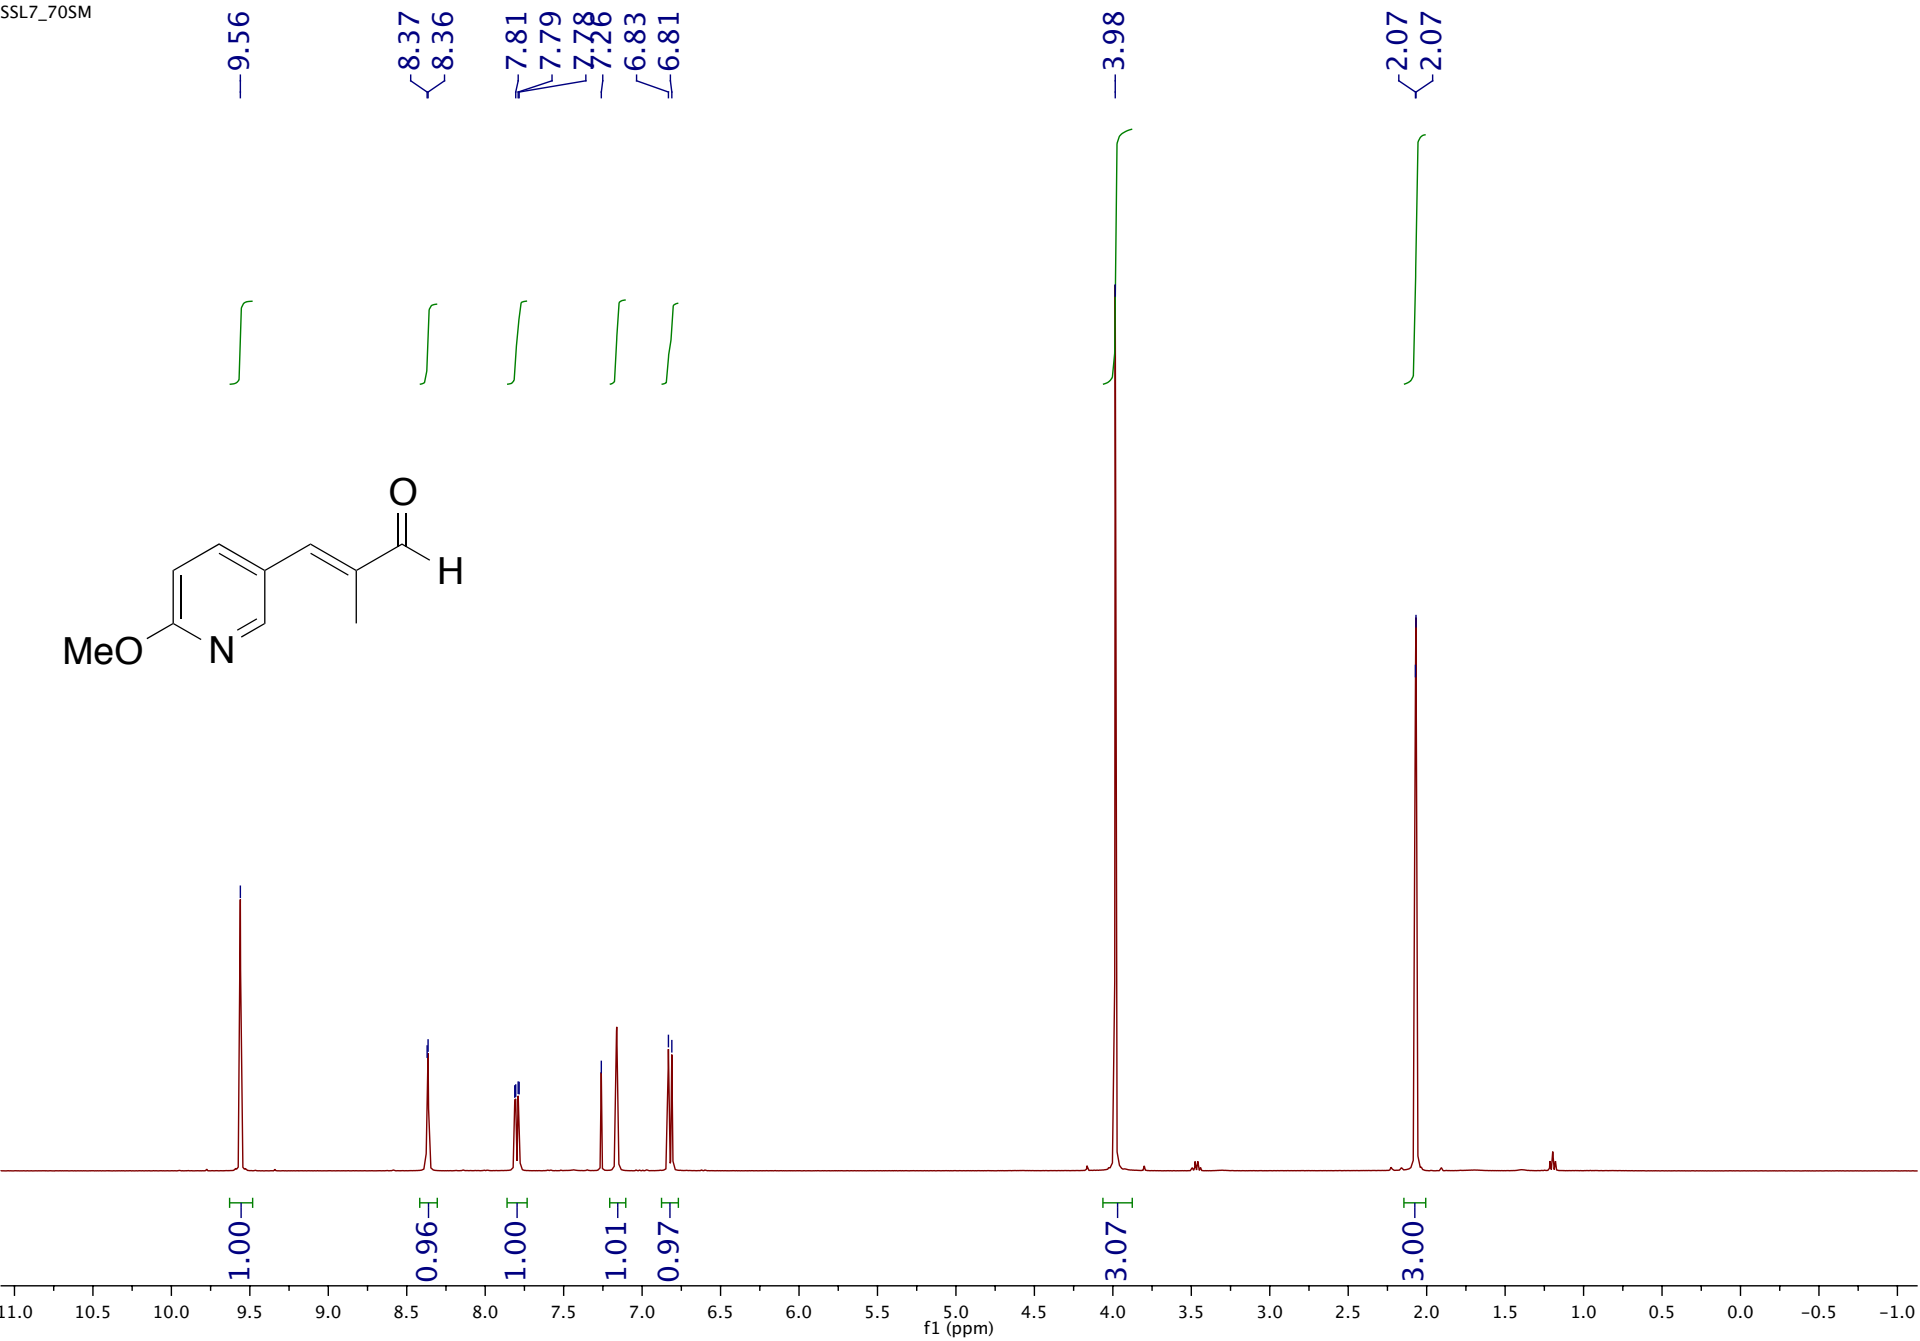

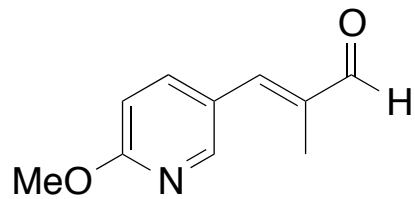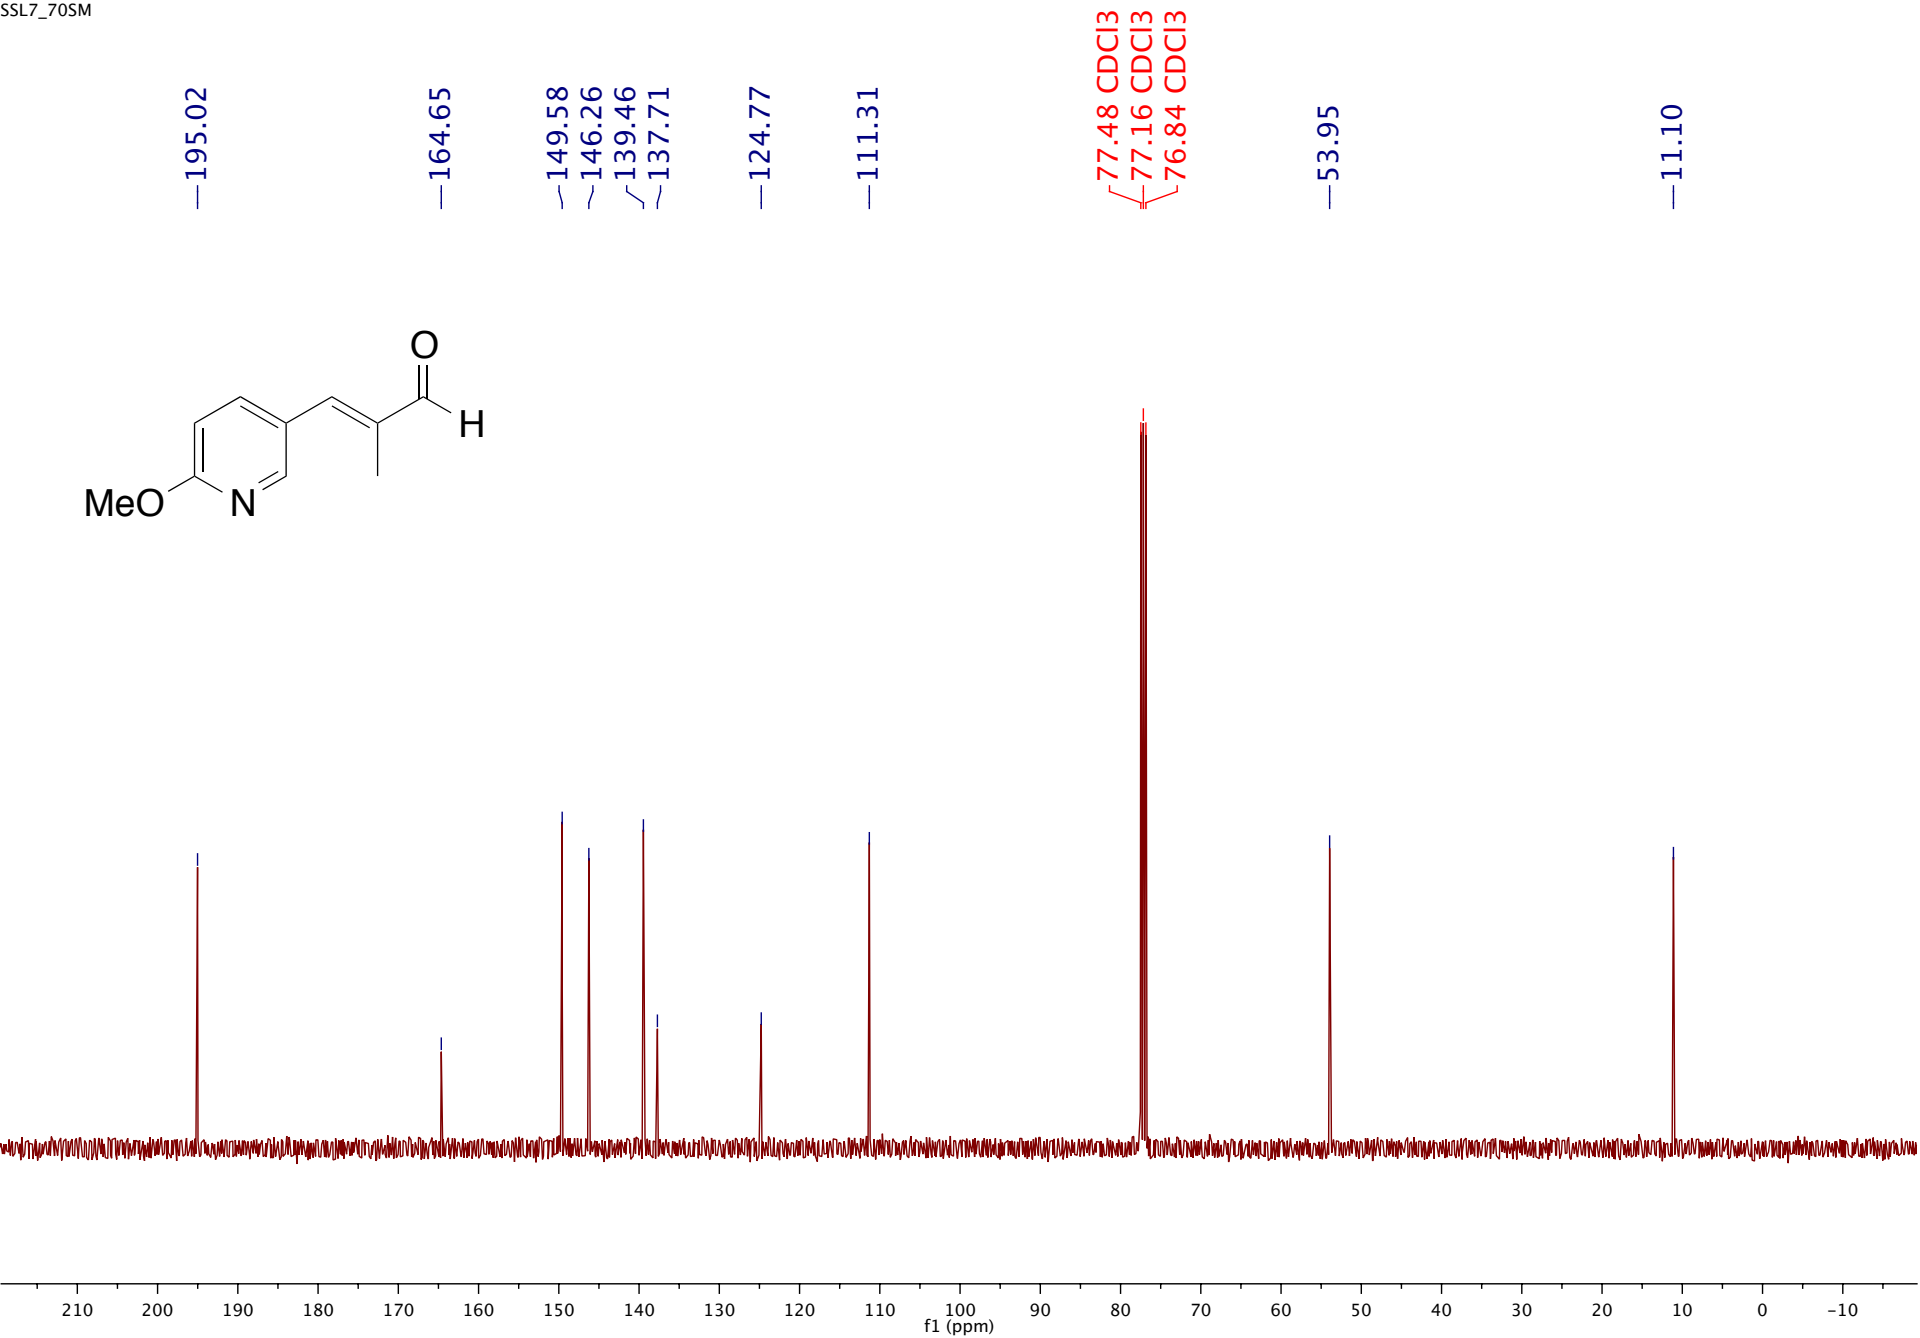

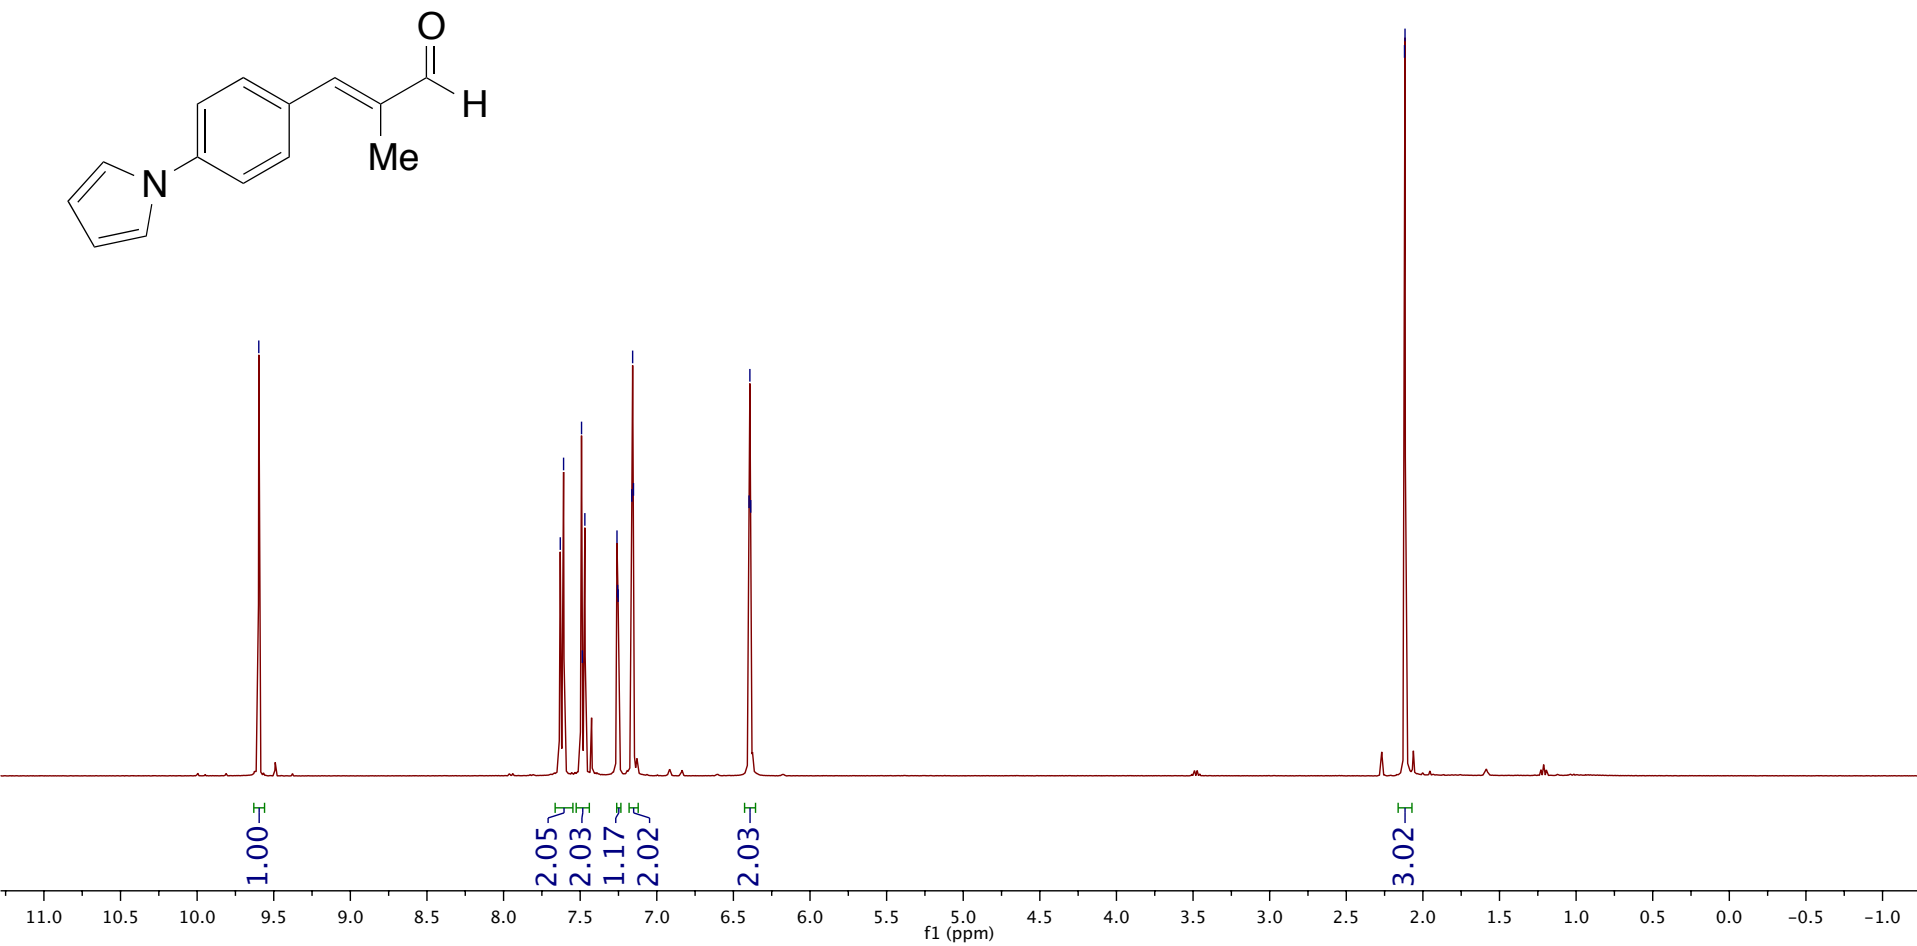

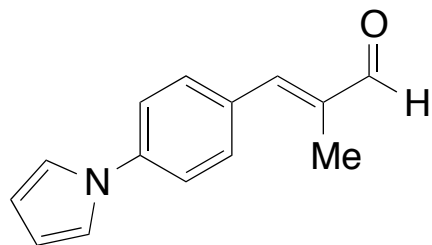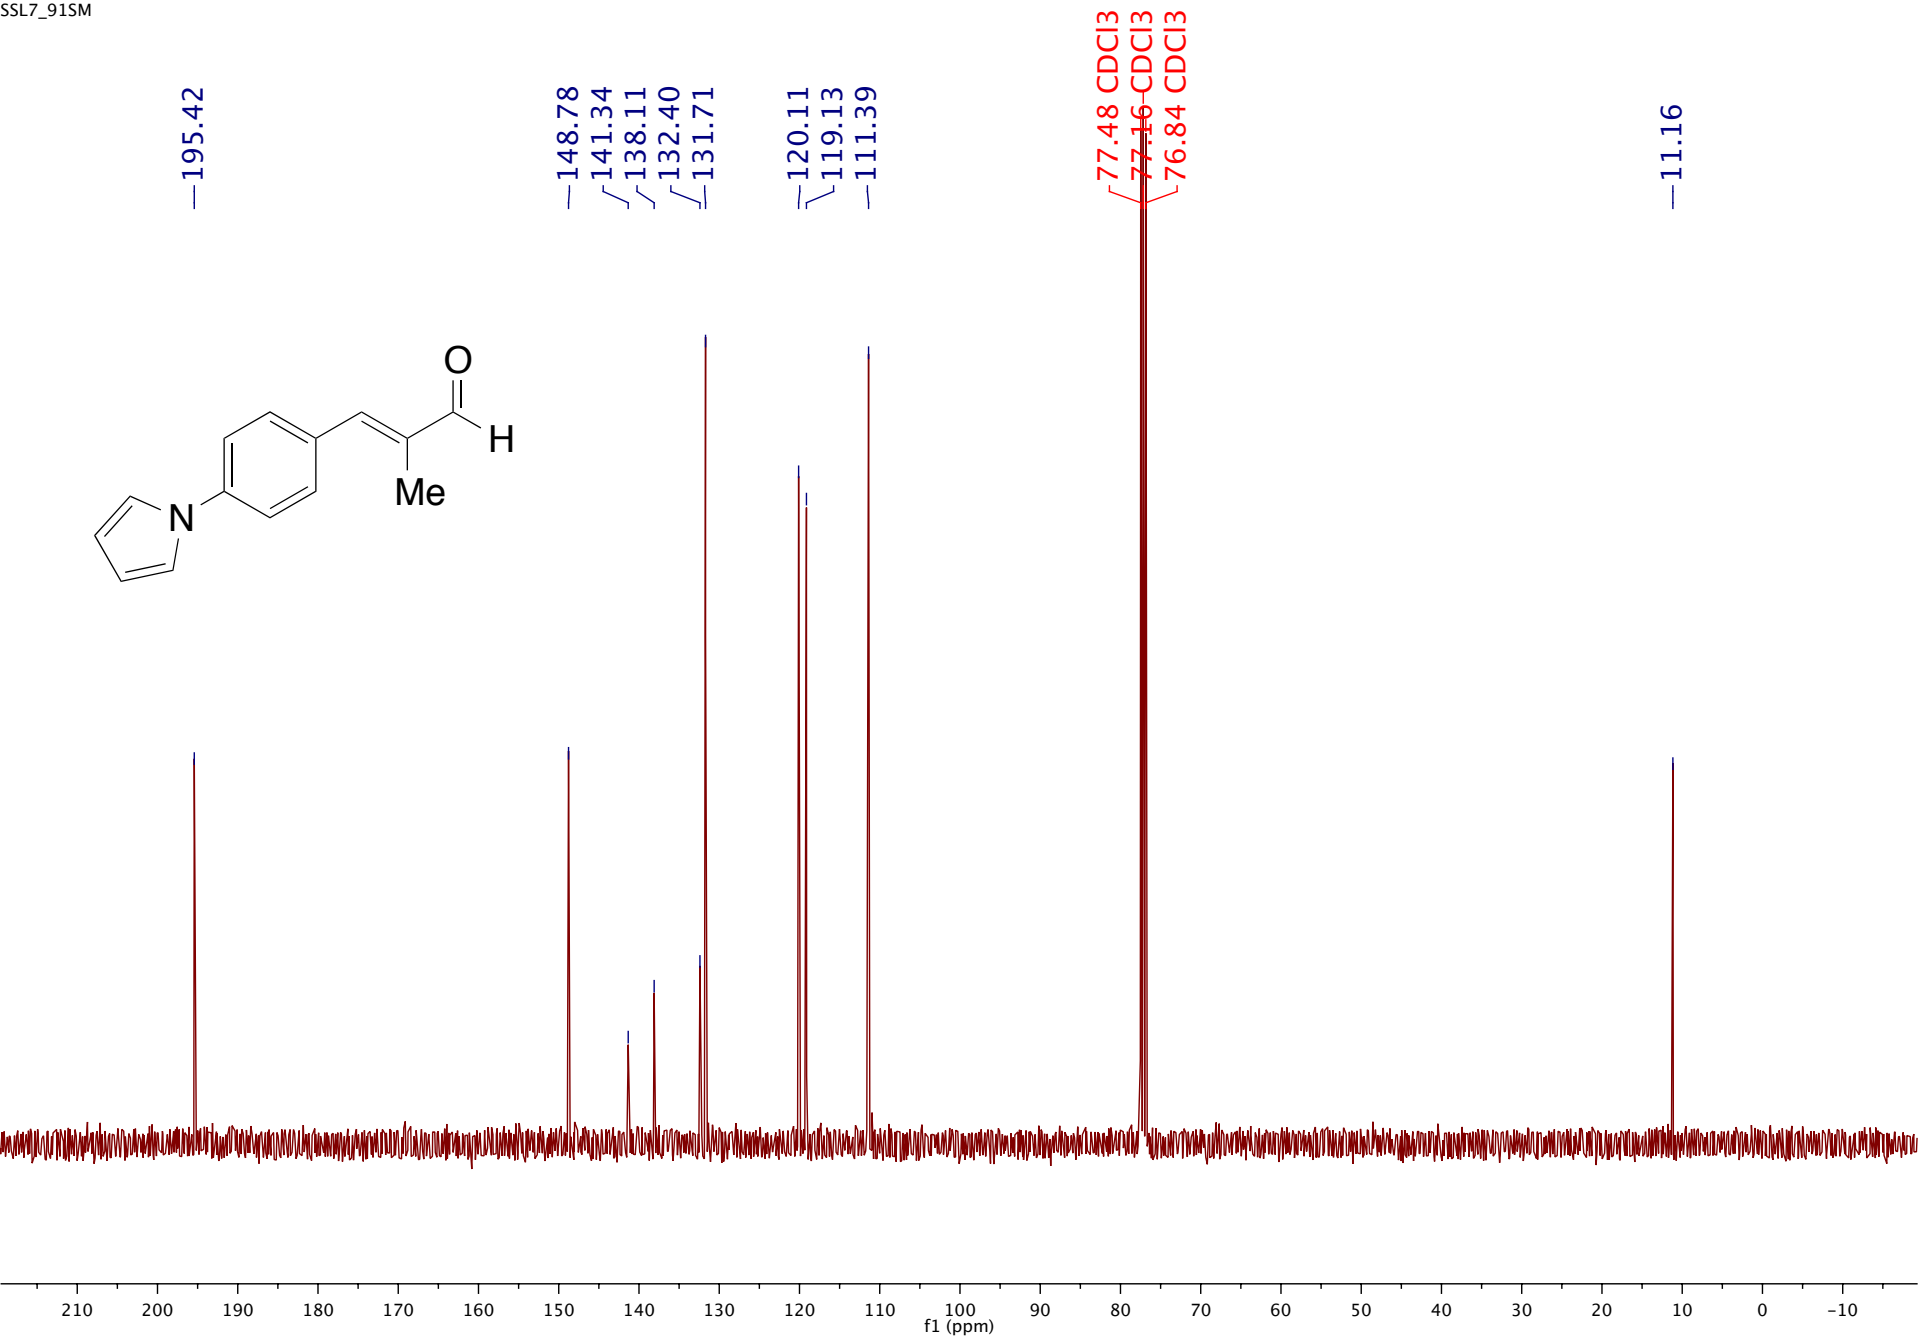

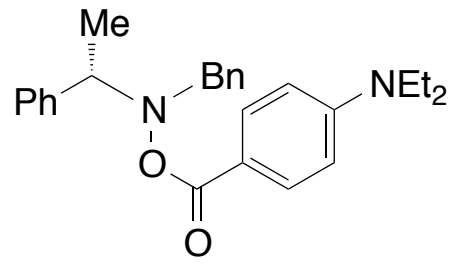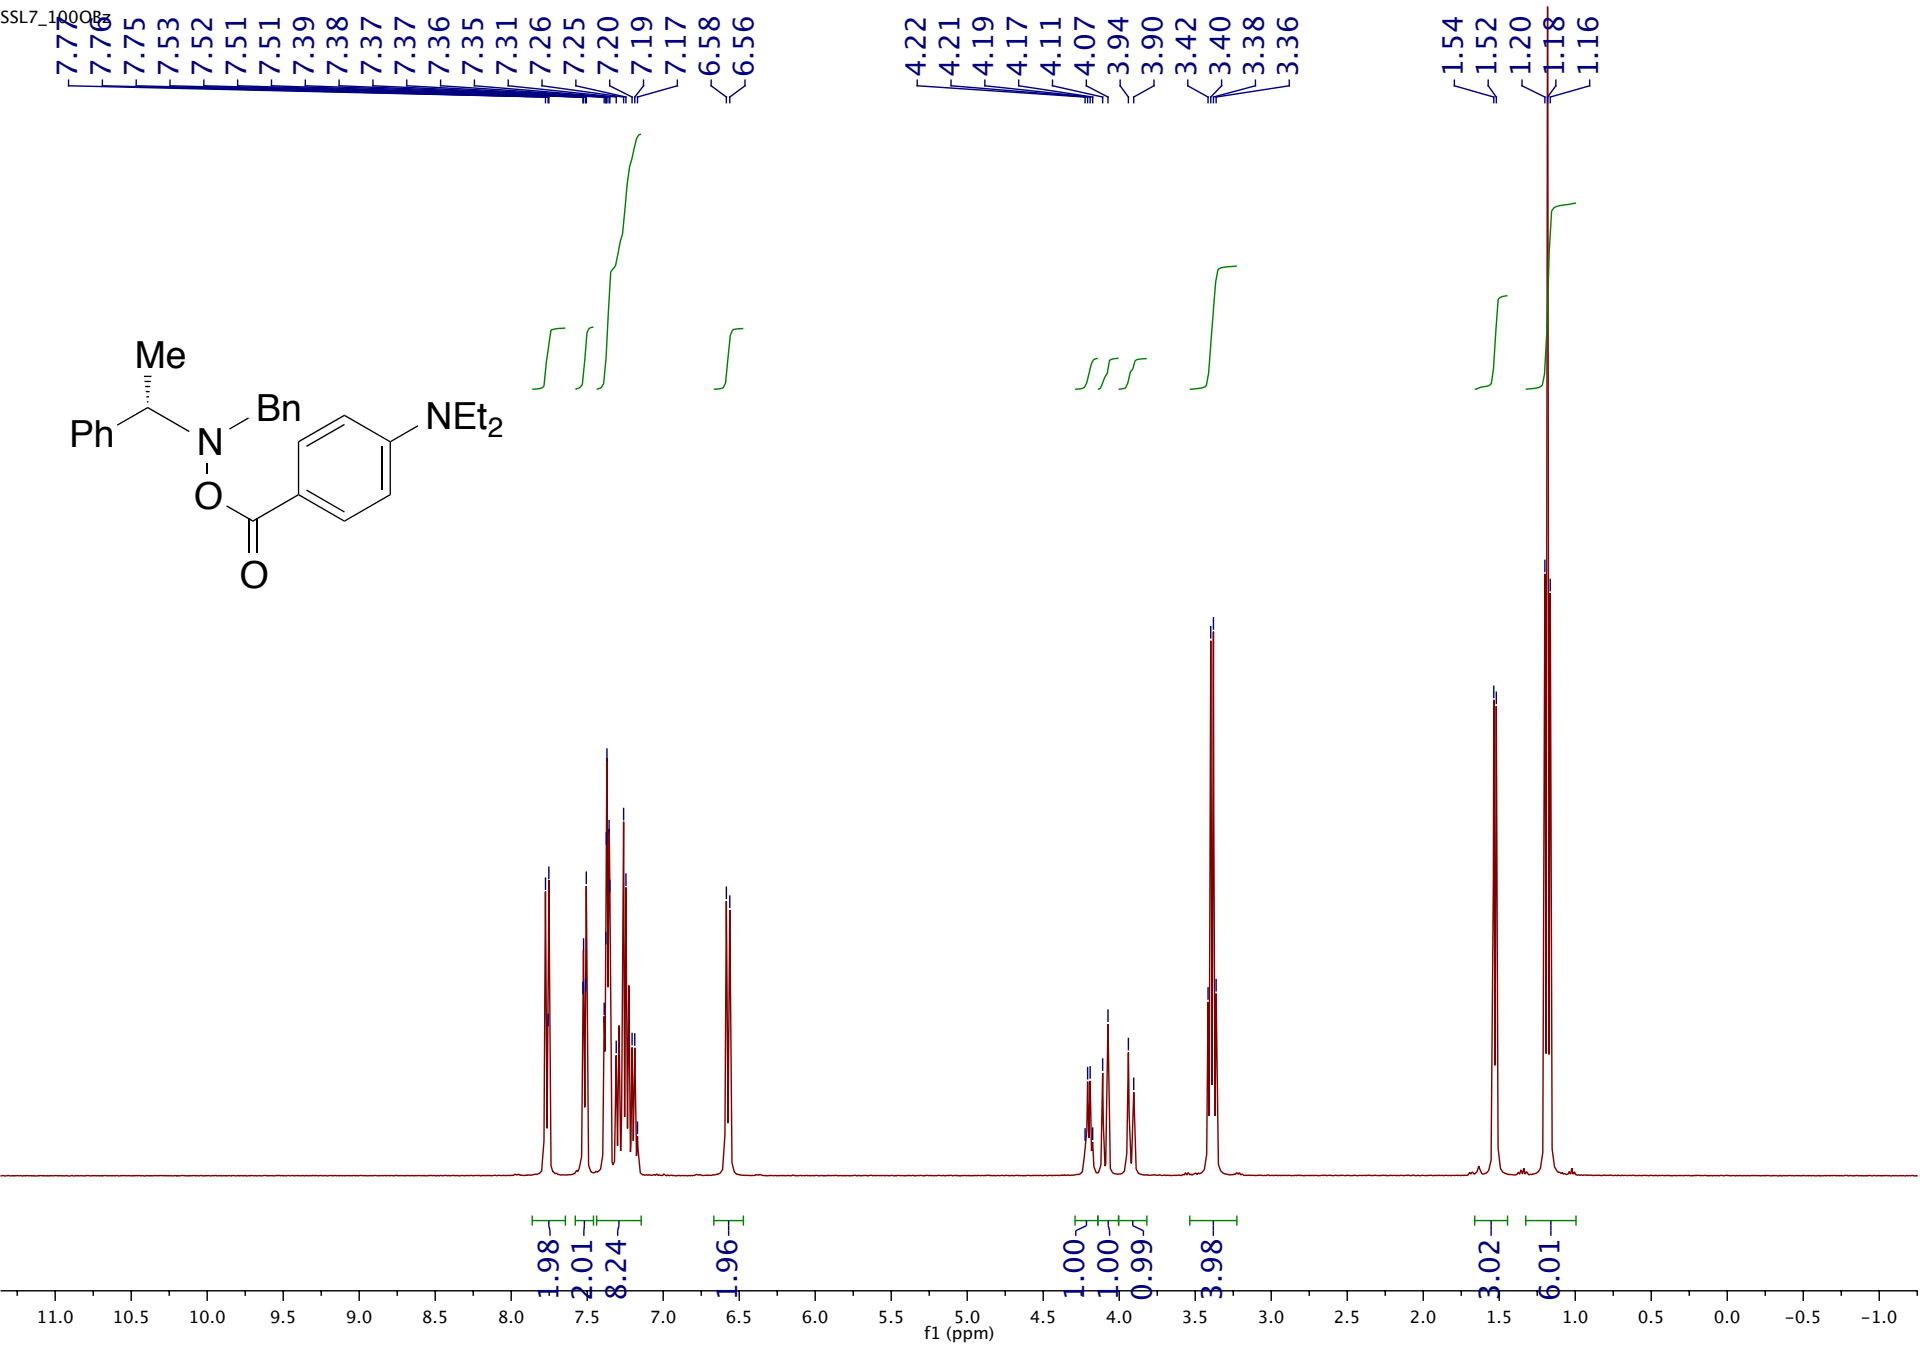

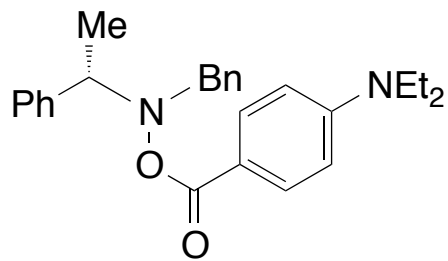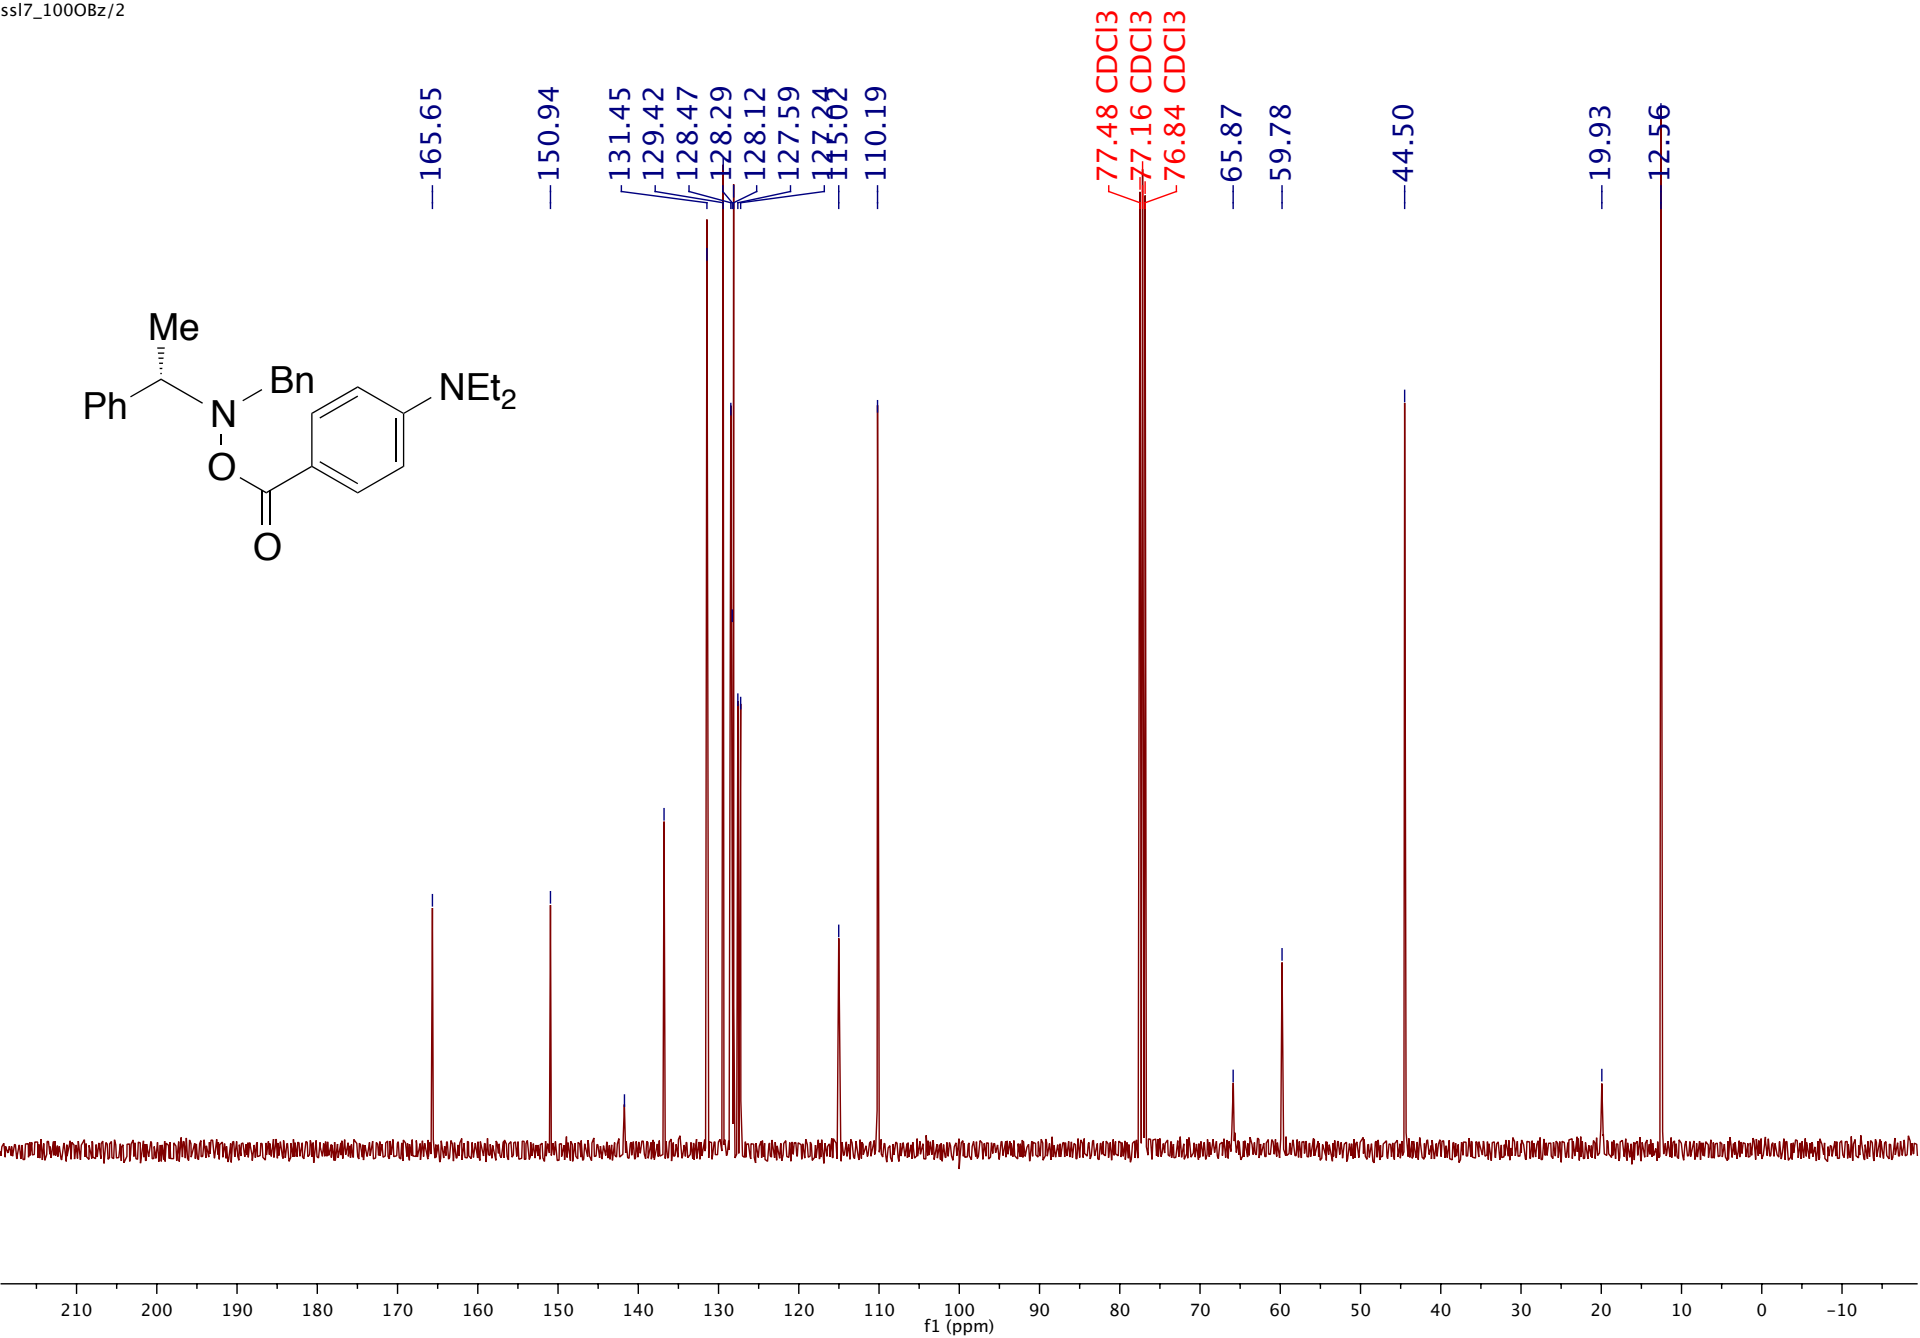

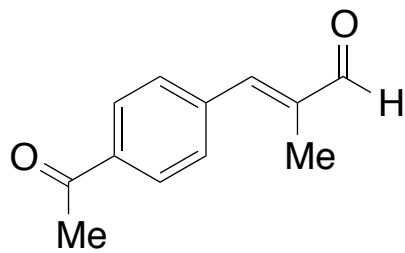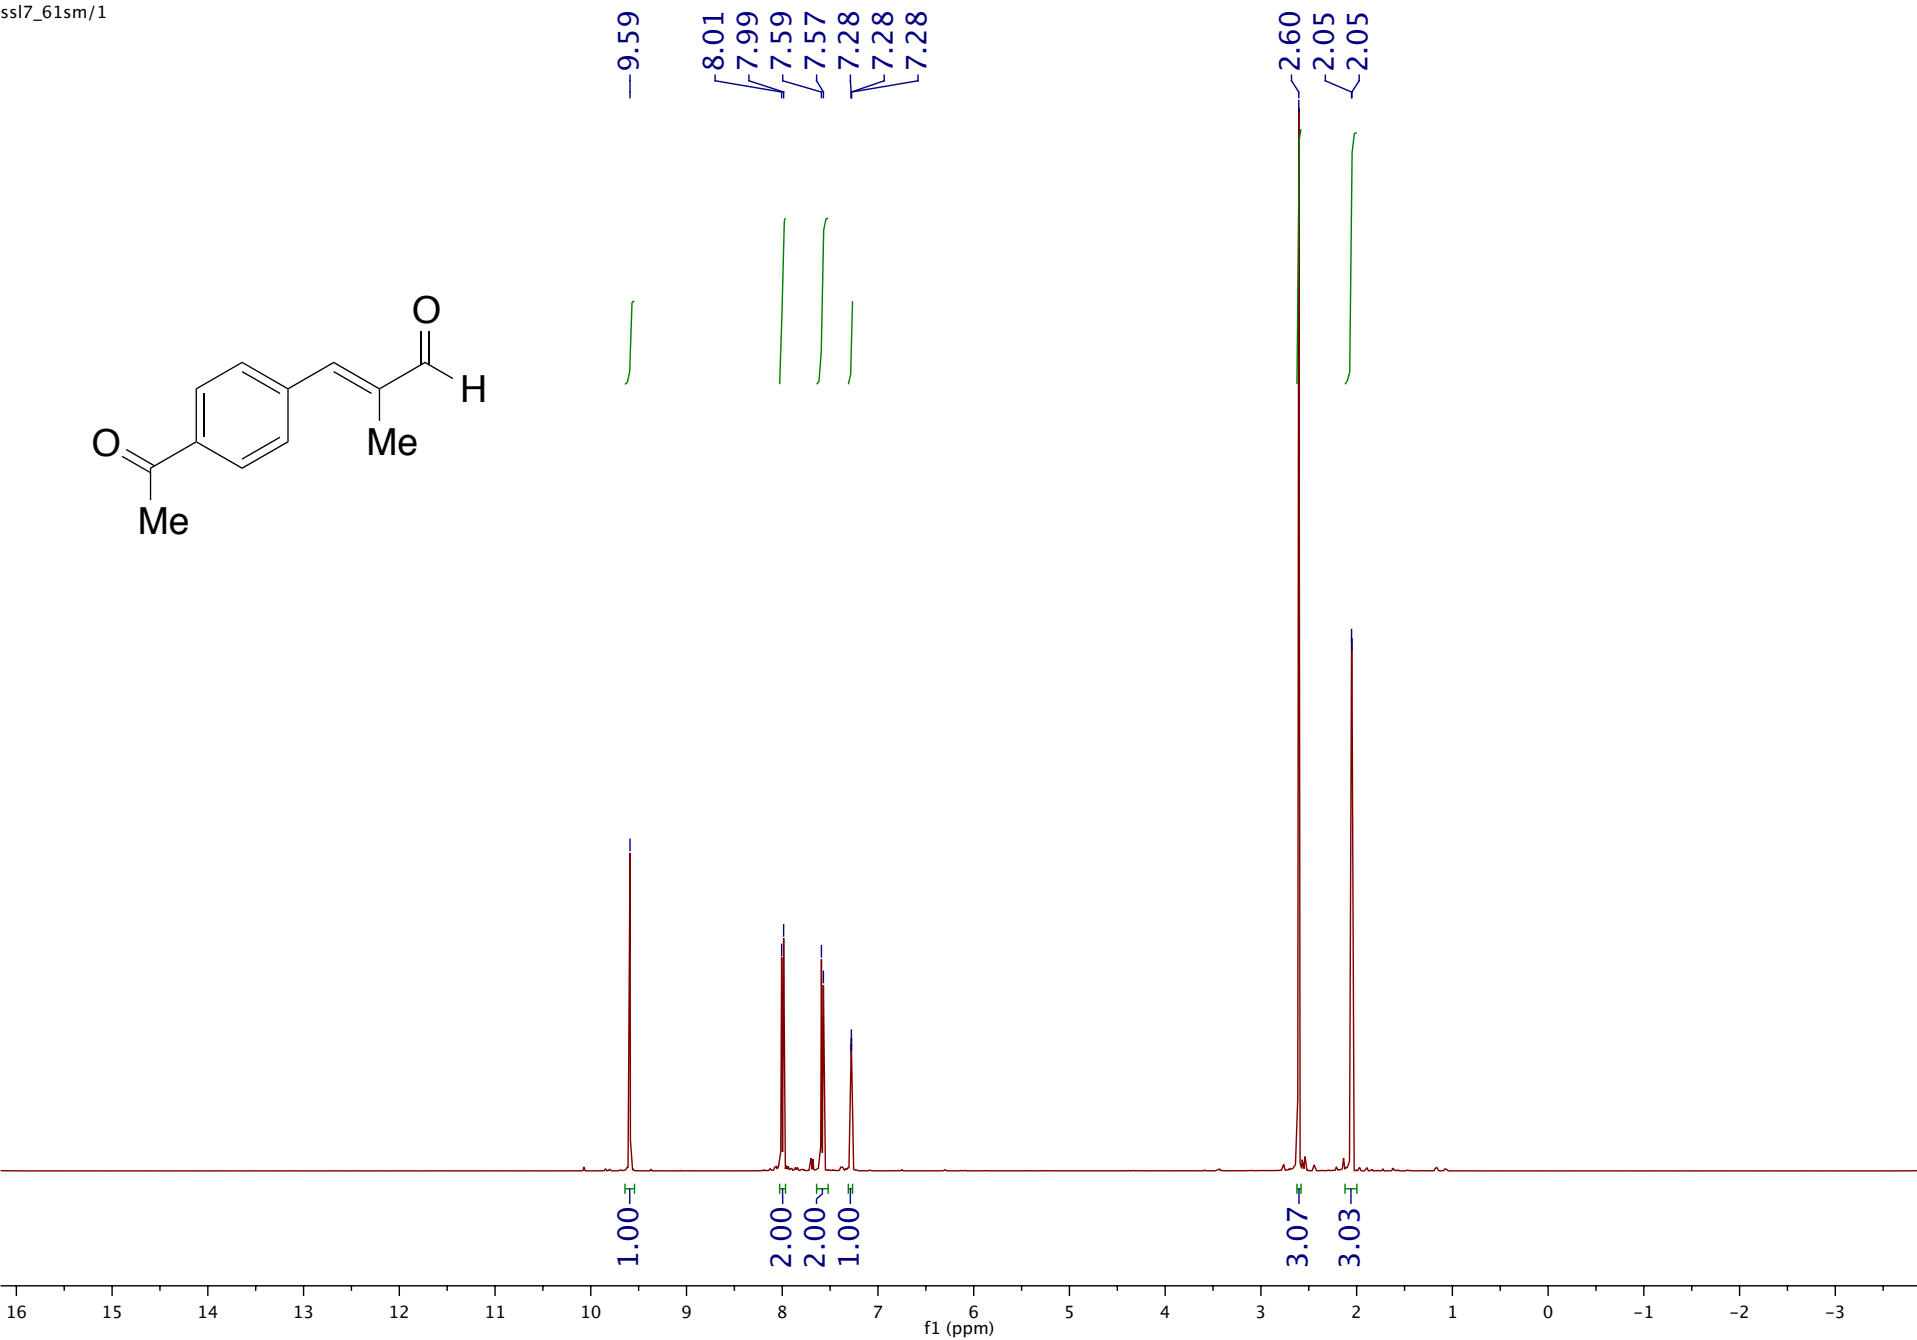

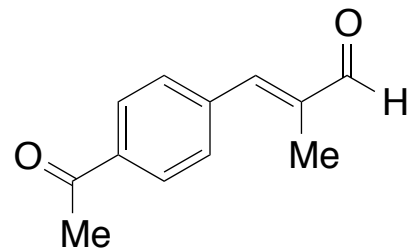

~197.39  
~195.18

~147.93  
~140.18  
~139.55  
~137.26  
~130.05  
~128.62

77.48 CDCl<sub>3</sub>  
77.16 CDCl<sub>3</sub>  
76.84 CDCl<sub>3</sub>

-26.74

-11.11

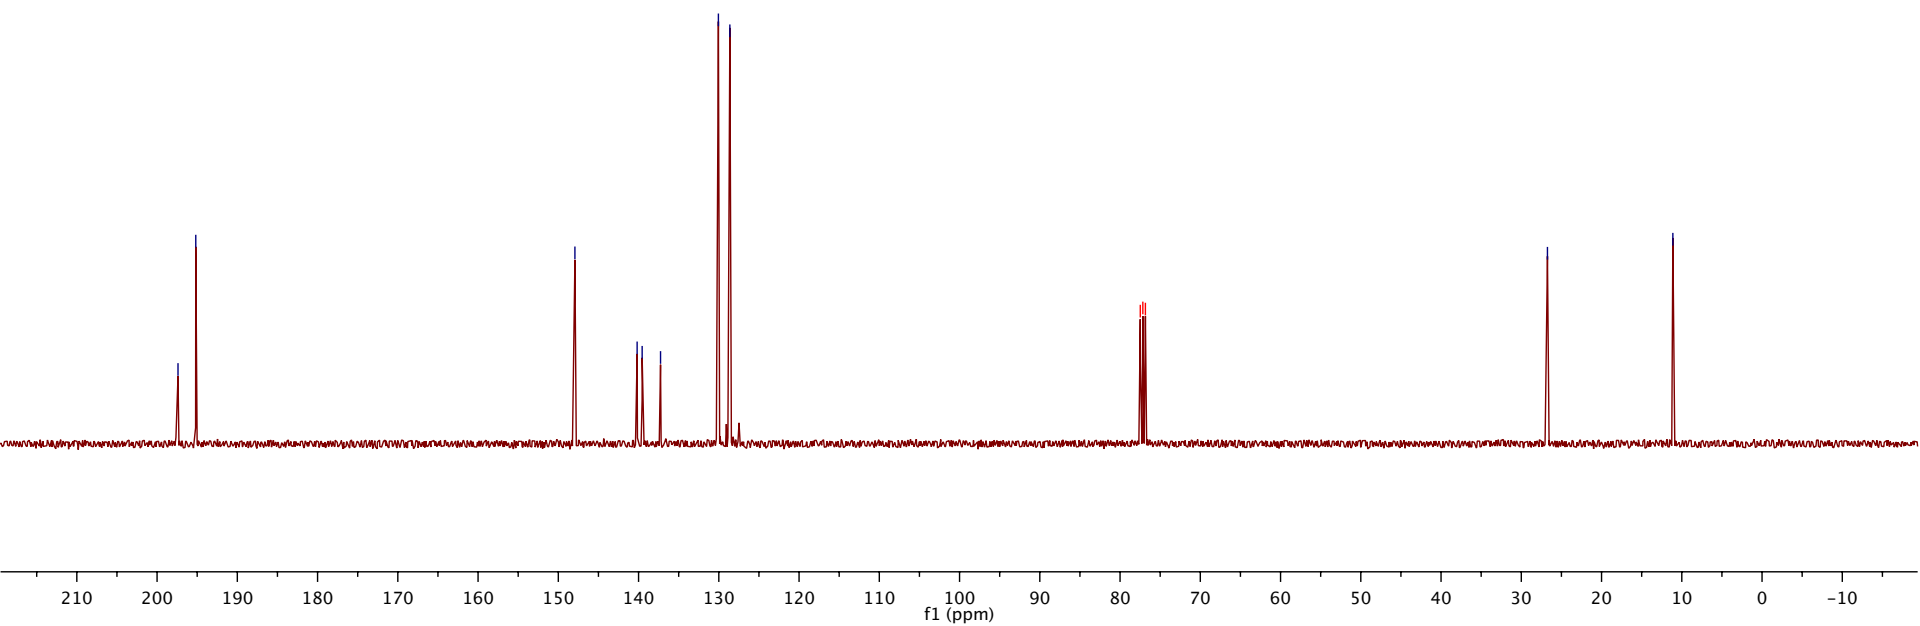



9.99  
7.74  
7.74  
7.73  
7.62  
7.62  
7.62  
7.61  
7.60  
7.57  
7.57  
7.56  
7.56  
7.55  
7.55  
7.55  
7.43  
7.42  
7.41  
7.41  
7.39  
7.39  
7.38  
7.37  
7.36  
7.35  
7.26  
3.67  
3.67

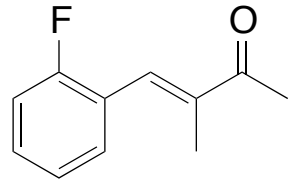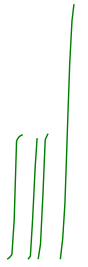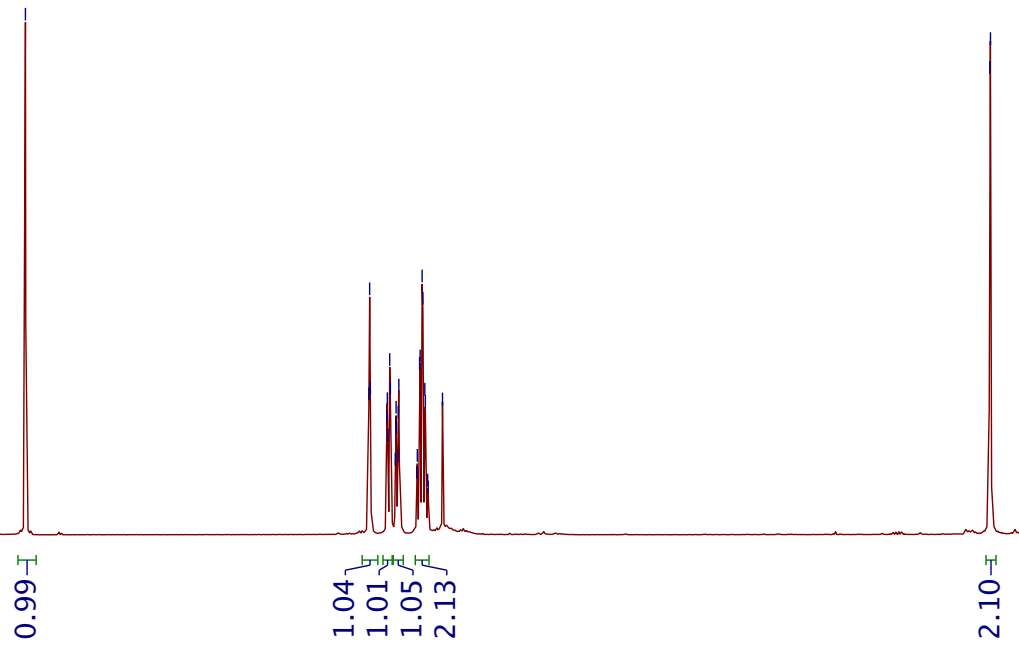

0.99

1.04  
1.01  
1.05  
2.13

2.10

11.0 10.5 10.0 9.5 9.0 8.5 8.0 7.5 7.0 6.5 6.0 5.5 5.0 4.5 4.0 3.5 3.0 2.5 2.0 1.5 1.0 0.5 0.0 -0.5 -1.0

f1 (ppm)

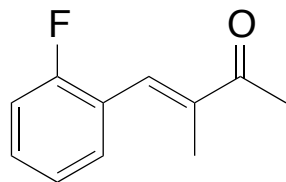

—188.39

147.93

147.21

145.22

142.38

129.05

127.31

124.98

124.41

77.48 CDCl3

77.16 CDCl3

76.84 CDCl3

—35.66

210 200 190 180 170 160 150 140 130 120 110 100 90 80 70 60 50 40 30 20 10 0 -10  
f1 (ppm)

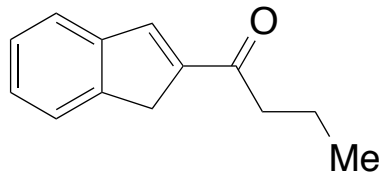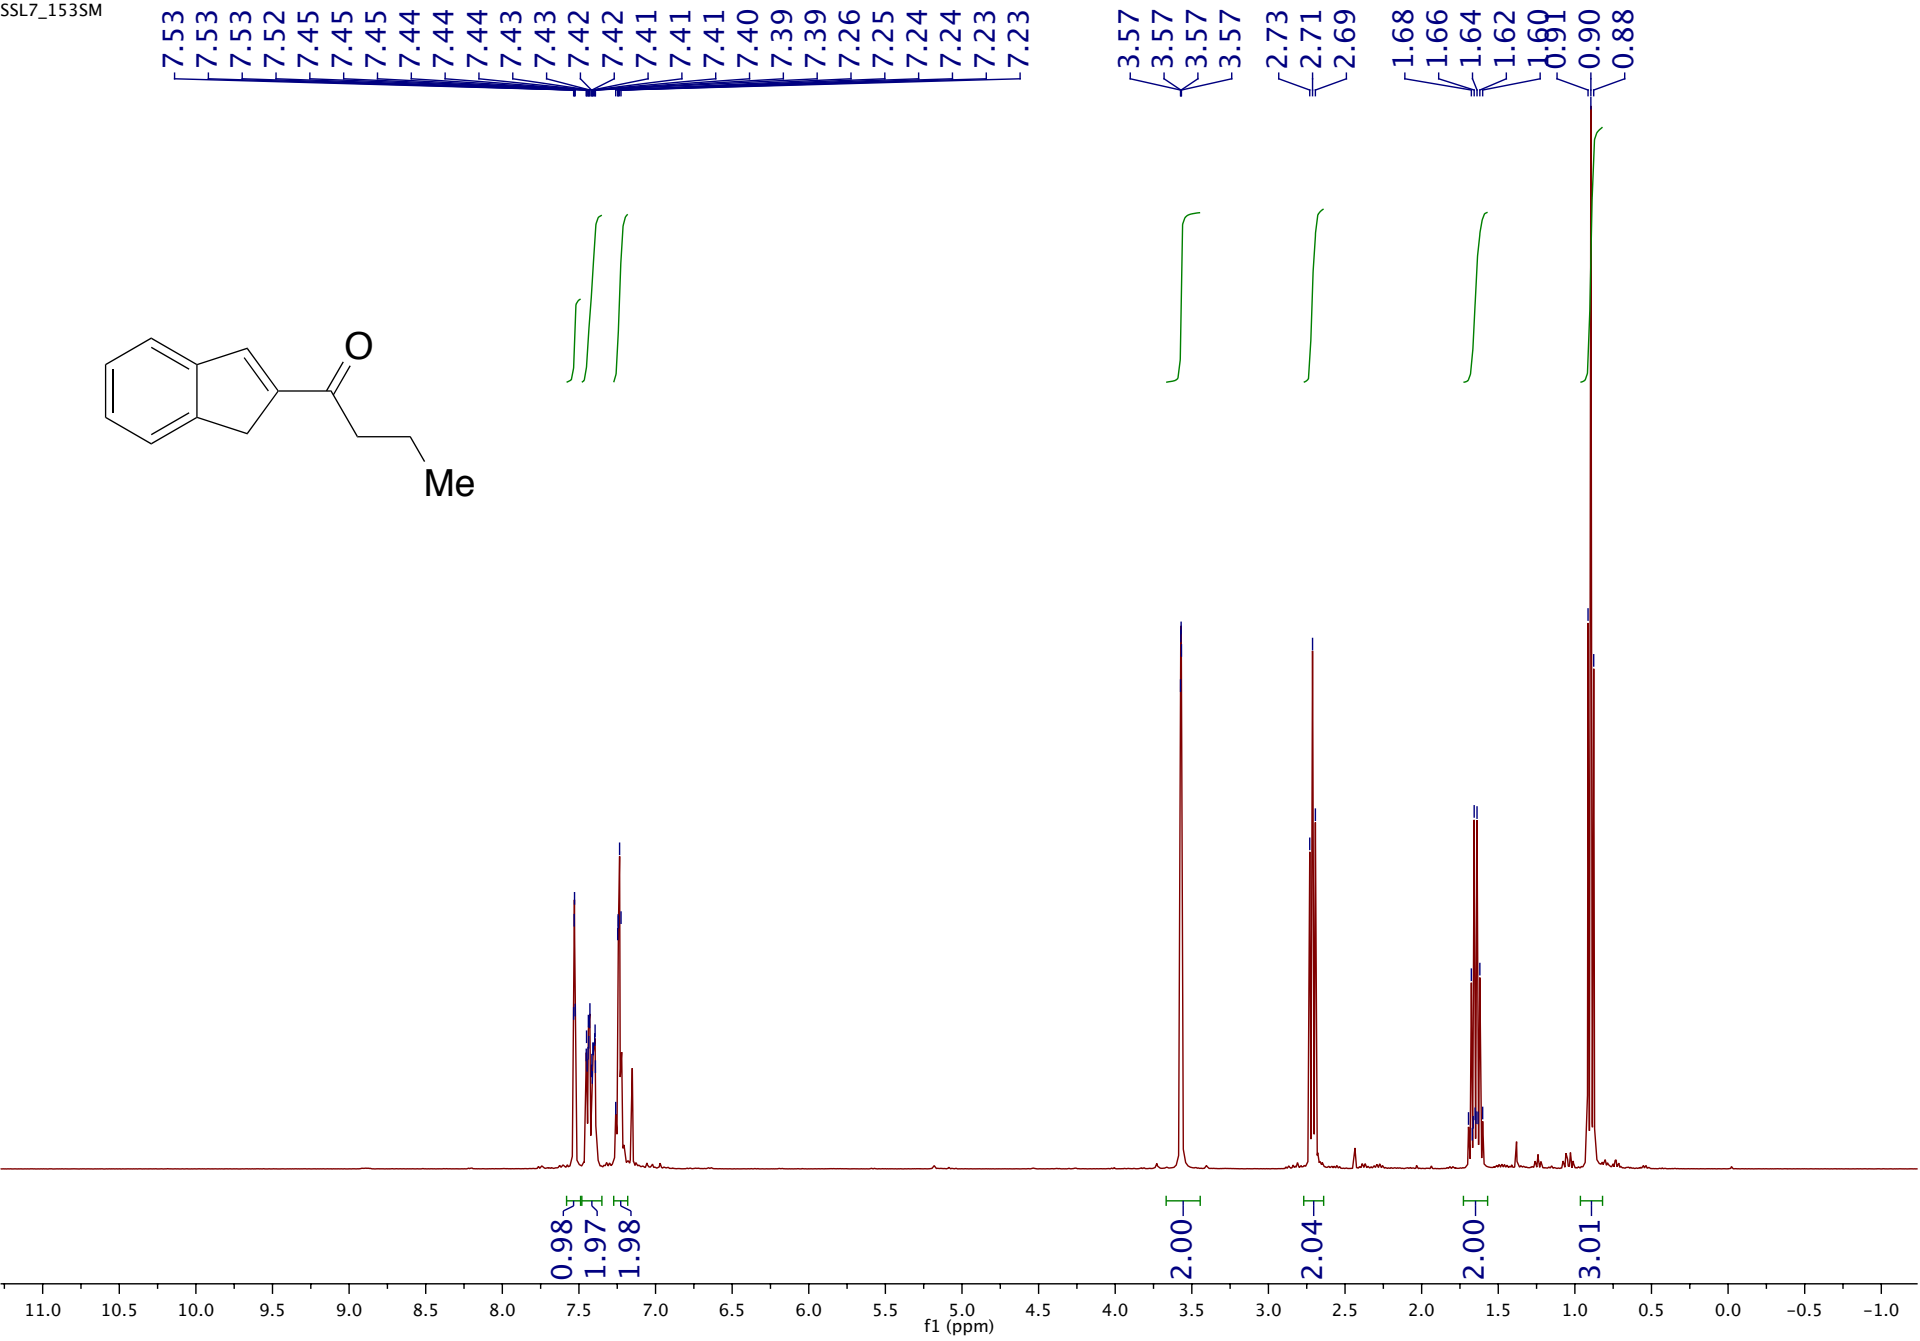

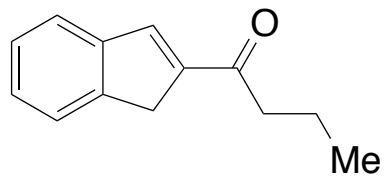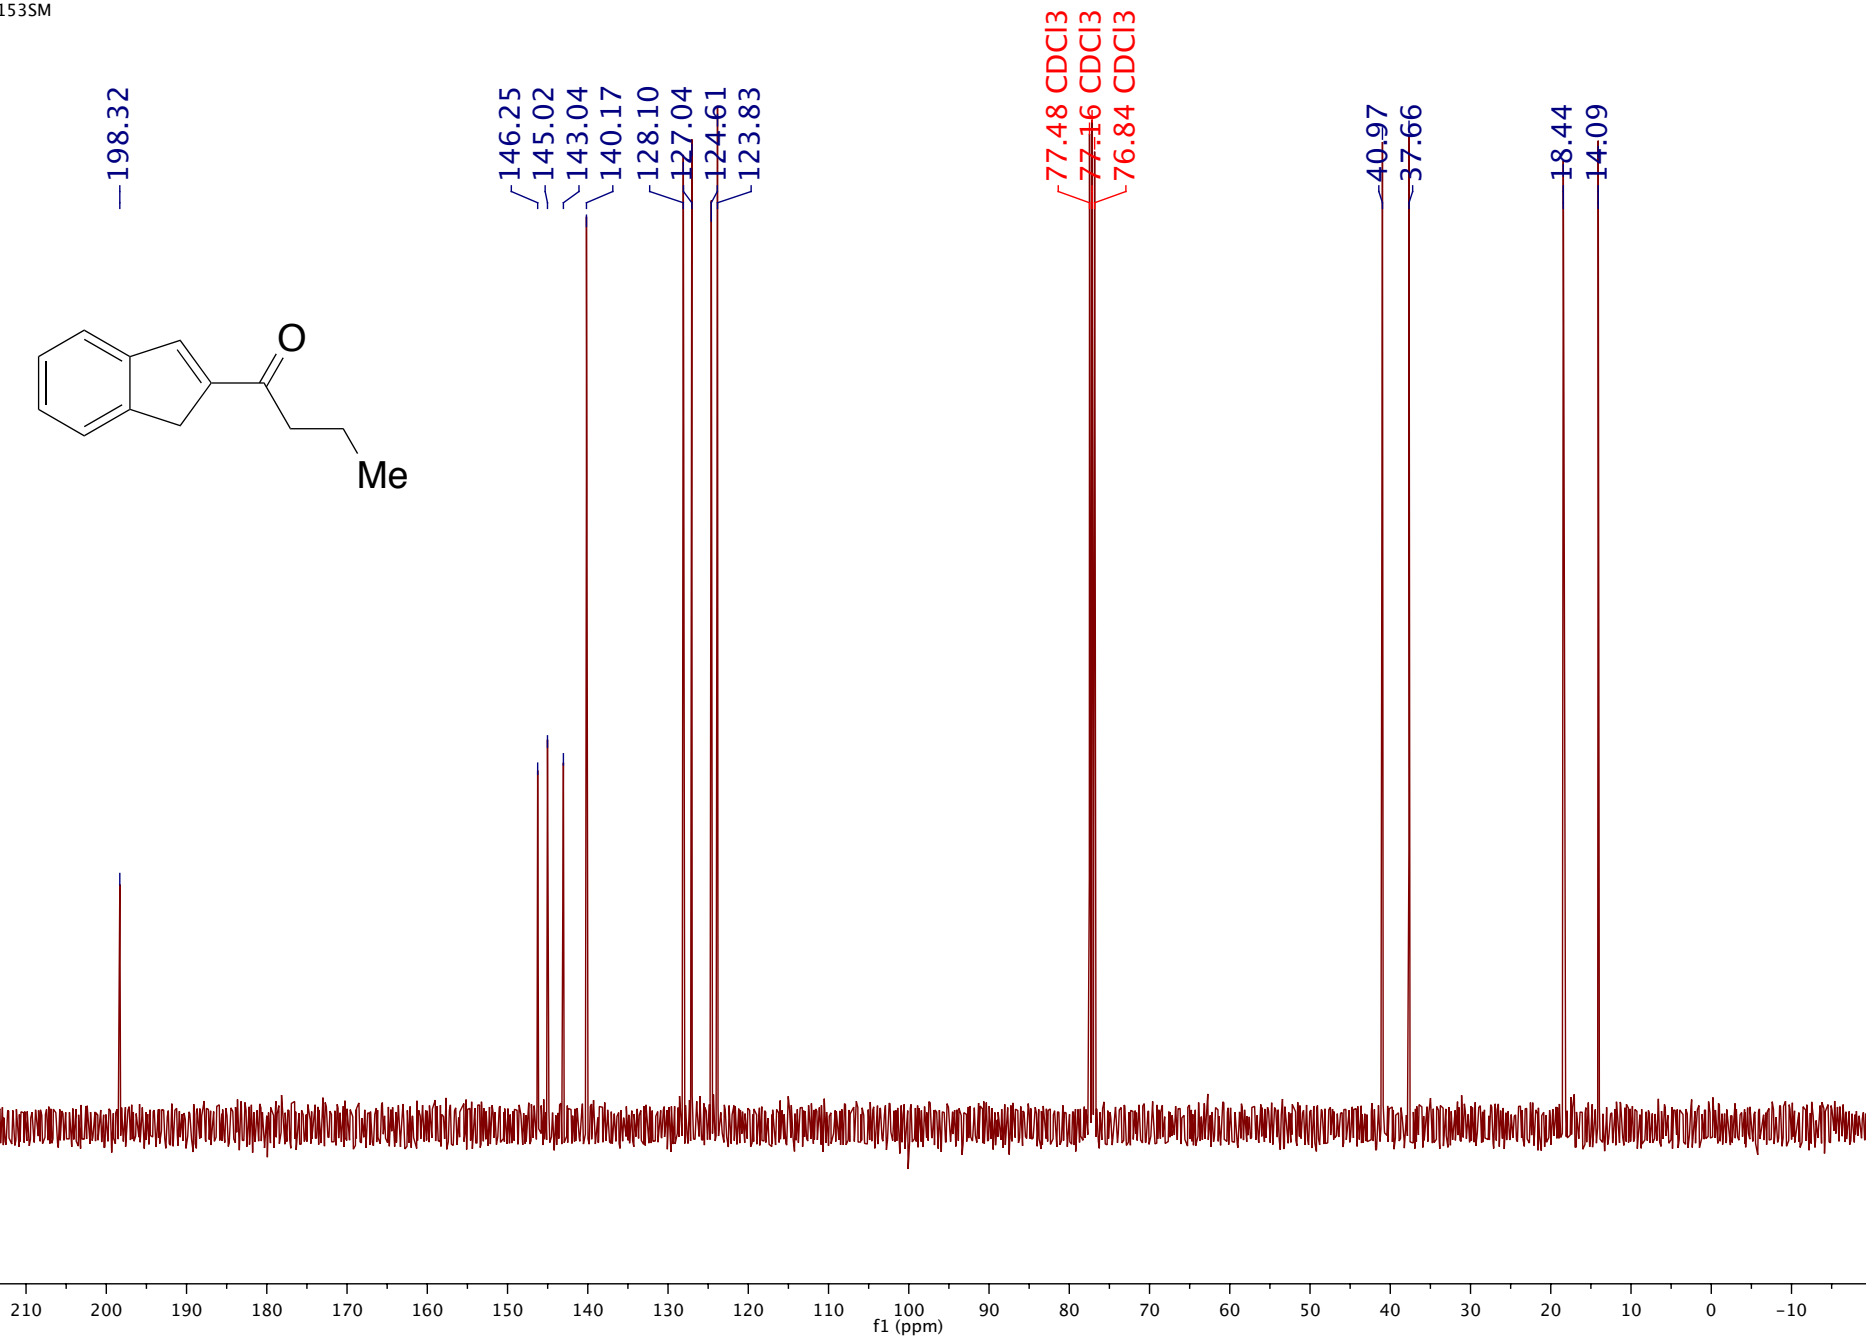

=====

|                                                                    |                    |
|--------------------------------------------------------------------|--------------------|
| Acq. Operator : SSL                                                | Seq. Line : 1      |
| Acq. Instrument : Instrument 1                                     | Location : Vial 21 |
| Injection Date : 8/13/2015 5:48:51 PM                              | Inj : 1            |
|                                                                    | Inj Volume : 5 µl  |
| Different Inj Volume from Sequence ! Actual Inj Volume : 0.6 µl    |                    |
| Acq. Method : C:\CHEM32\1\DATA\SSL\ATP 2015-08-13 17-47-32\02-30.M |                    |
| Last changed : 8/13/2015 6:32:55 PM by SSL                         |                    |
| (modified after loading)                                           |                    |
| Analysis Method : C:\CHEM32\1\METHODS\MTP-02IPA-06ML-MIN-30MIN.M   |                    |

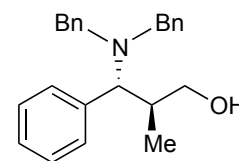

Racemic

DAD1 D, Sig=220,2 Ref=360,100 (SSLATP 2015-08-13 17-47-32SSL7-176-IC.D)

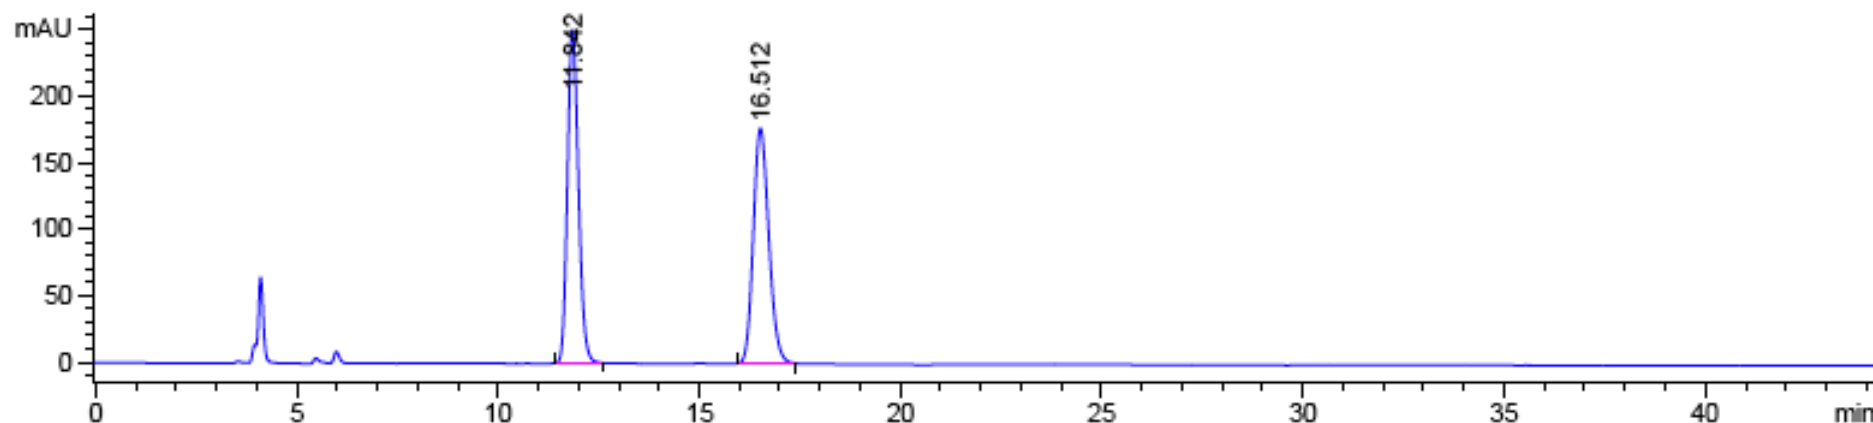

Signal 3: DAD1 C, Sig=210,8 Ref=360,100

| Peak # | RetTime [min] | Type | Width [min] | Area [mAU*s] | Height [mAU] | Area %  |
|--------|---------------|------|-------------|--------------|--------------|---------|
| 1      | 11.842        | BB   | 0.2965      | 1.07895e4    | 565.74426    | 50.1928 |
| 2      | 16.512        | BB   | 0.4168      | 1.07067e4    | 399.35028    | 49.8072 |

Totals : 2.14962e4 965.09454

Sample Name: SSL7-160

```

=====
Acq. Operator   : SSL                               Seq. Line :    1
Acq. Instrument : Instrument 1                       Location  : Vial 21
Injection Date  : 8/13/2015 7:11:21 PM             Inj       :    1
                                                    Inj Volume: 5 µl
Different Inj Volume from Sequence !      Actual Inj Volume : 1 µl
Acq. Method    : C:\CHEM32\1\DATA\SSL\ATP 2015-08-13 19-10-01\02-30.M
Last changed   : 8/13/2015 7:09:59 PM by SSL
Analysis Method: C:\CHEM32\1\METHODS\MTP-02IPA-06ML-MIN-30MIN.M
  
```

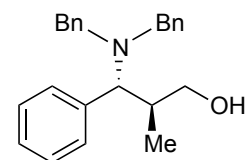

DAD1 D, Sig=220,2 Ref=360,100 (SSLATP 2015-08-13 19-10-01\SSL7-160-IC.D)

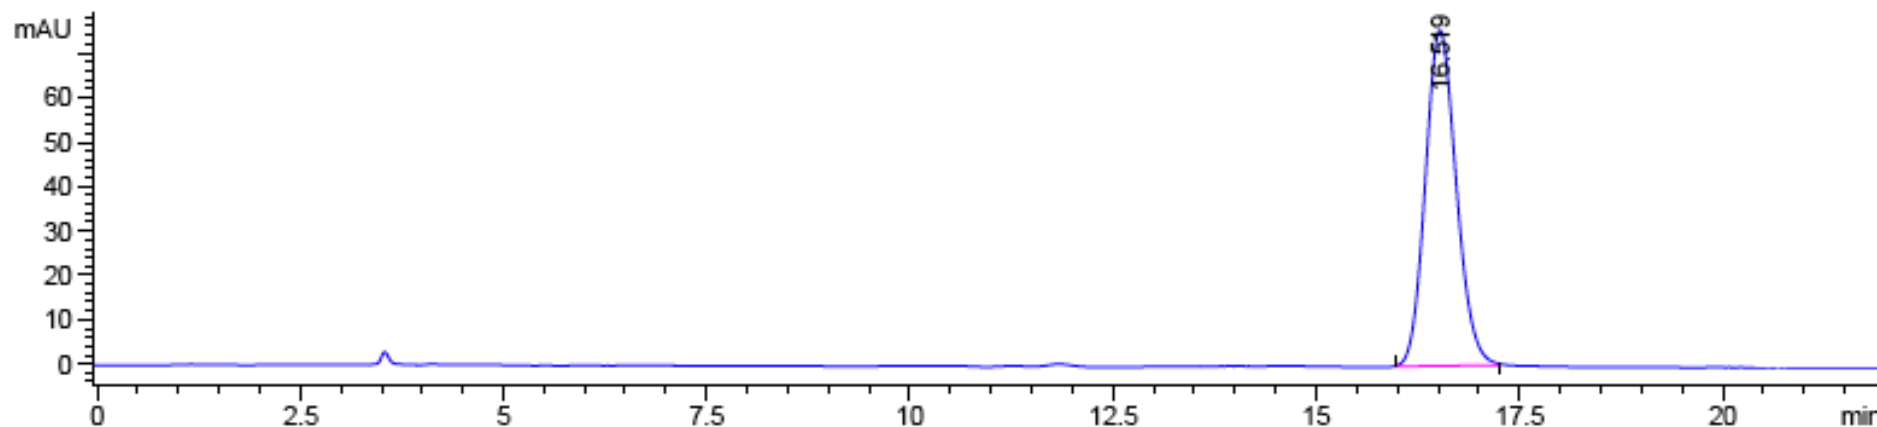

Signal 4: DAD1 D, Sig=220,2 Ref=360,100

| Peak # | RetTime [min] | Type | Width [min] | Area [mAU*s] | Height [mAU] | Area %   |
|--------|---------------|------|-------------|--------------|--------------|----------|
| 1      | 16.519        | BB   | 0.4094      | 2003.53064   | 75.55466     | 100.0000 |

Totals :                      2003.53064    75.55466

Sample Name: SSL7-34C

```

=====
Acq. Operator   : SSL                      Seq. Line :    1
Acq. Instrument : Instrument 1              Location  : Vial 21
Injection Date  : 5/12/2015 11:48:41 PM   Inj       :    1
                                           Inj Volume: 5 µl
Acq. Method    : C:\CHEM32\1\DATA\SSL\NAOYUKI_LC 2015-05-12 23-46-17\20-50.M
Last changed   : 5/12/2015 11:46:16 PM by SSL
Analysis Method: C:\CHEM32\1\METHODS\03-30.M
  
```

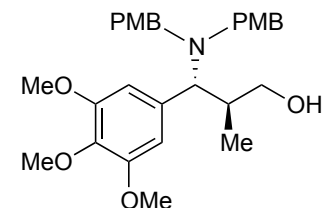

Racemic

DAD1 C, Sig=210,8 Ref=360,100 (C:\CHEM32\1\DATA\SSL\NAOYUKI\_LC 2015-05-12 23-46-17\SSL7-34C.D)

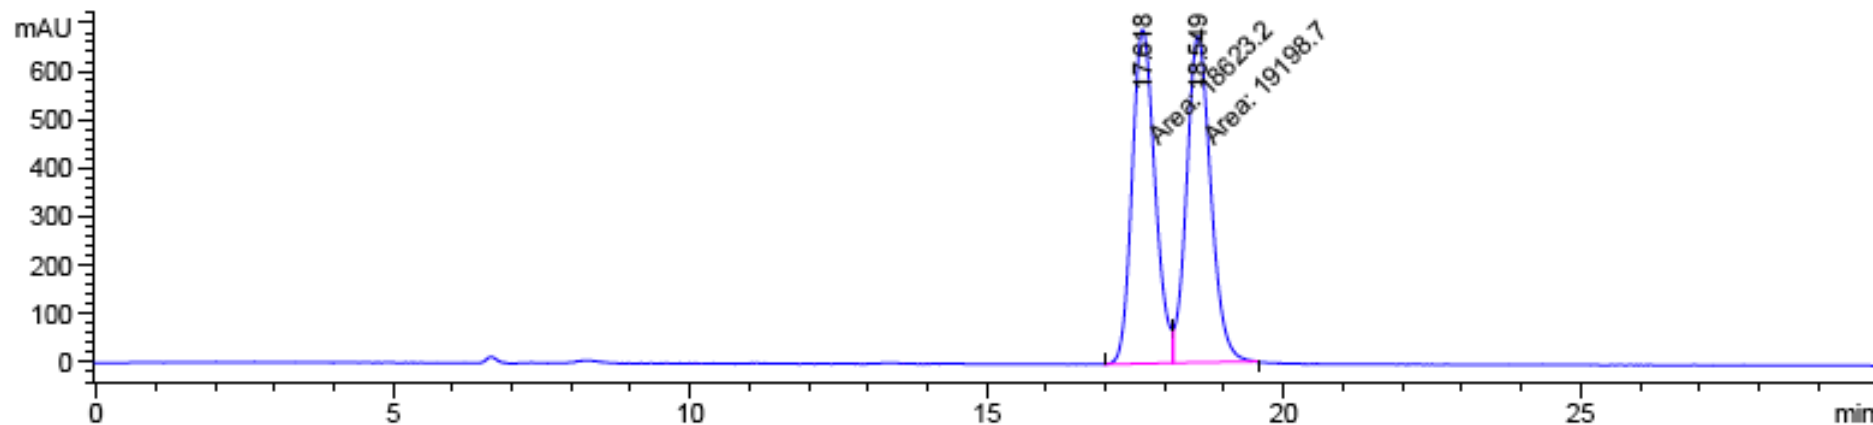

Signal 4: DAD1 D, Sig=220,2 Ref=360,100

| Peak # | RetTime [min] | Type | Width [min] | Area [mAU*s] | Height [mAU] | Area %  |
|--------|---------------|------|-------------|--------------|--------------|---------|
| 1      | 17.620        | MF   | 0.4446      | 1.18444e4    | 444.01517    | 49.5189 |
| 2      | 18.551        | FM   | 0.4647      | 1.20745e4    | 433.03336    | 50.4811 |

Sample Name: SSL7-35

```

=====
Acq. Operator   : SSL                      Seq. Line :    1
Acq. Instrument : Instrument 1              Location  : Vial 21
Injection Date  : 5/13/2015 10:03:06 AM   Inj       :    1
                                           Inj Volume: 5 µl
Different Inj Volume from Sequence !      Actual Inj Volume : 1 µl
Acq. Method    : C:\CHEM32\1\DATA\SSL\NAOYUKI_LC 2015-05-13 10-00-47\20-50.M
Last changed   : 5/12/2015 11:46:16 PM by SSL
Analysis Method : C:\CHEM32\1\METHODS\03-30.M

```

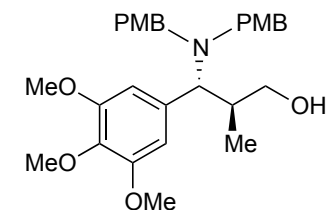

DAD1 C, Sig=210,8 Ref=360,100 (C:\CHEM32\1\DATA\SSL\NAOYUKI\_LC 2015-05-13 10-00-47\SSL7-35-IA.D)

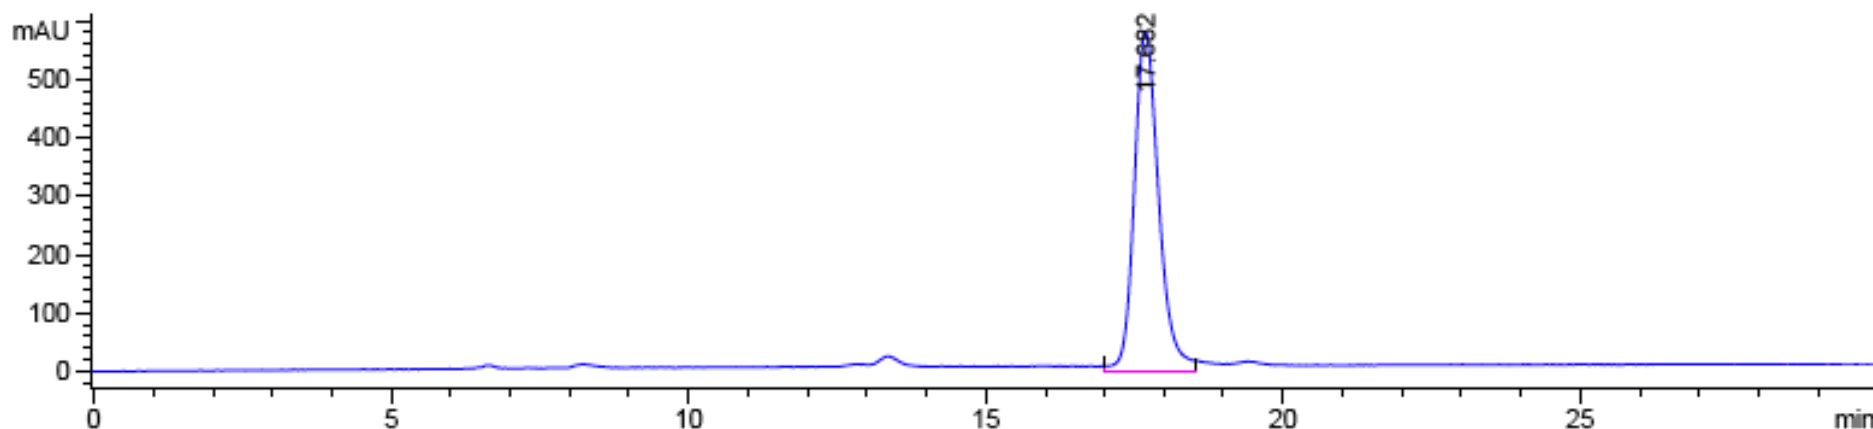

Signal 3: DAD1 C, Sig=210,8 Ref=360,100

| Peak # | RetTime [min] | Type | Width [min] | Area [mAU*s] | Height [mAU] | Area %   |
|--------|---------------|------|-------------|--------------|--------------|----------|
| 1      | 17.682        | VV   | 0.4367      | 1.66994e4    | 582.14197    | 100.0000 |

Totals : 1.66994e4 582.14197



Sample Name: SSL7-93BF2

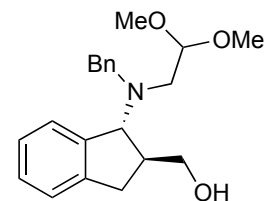

Racemic

```

=====
Acq. Operator   : SSL                      Seq. Line :    1
Acq. Instrument : Instrument 1              Location  : Vial 61
Injection Date  : 7/10/2015 6:26:21 PM    Inj       :    1
                                           Inj Volume: 5 µl
Different Inj Volume from Sequence !      Actual Inj Volume : 3 µl
Acq. Method     : C:\CHEM32\1\DATA\SSL\HPLC 2015-07-10 18-24-57\04-30.M
Last changed    : 7/10/2015 6:24:55 PM by SSL
Analysis Method : C:\CHEM32\1\METHODS\10-30.M
  
```

DAD1 C, Sig=210,8 Ref=360,100 (SSLHPLC 2015-07-10 18-24-57\SSL7-93BF2-OJH.D)

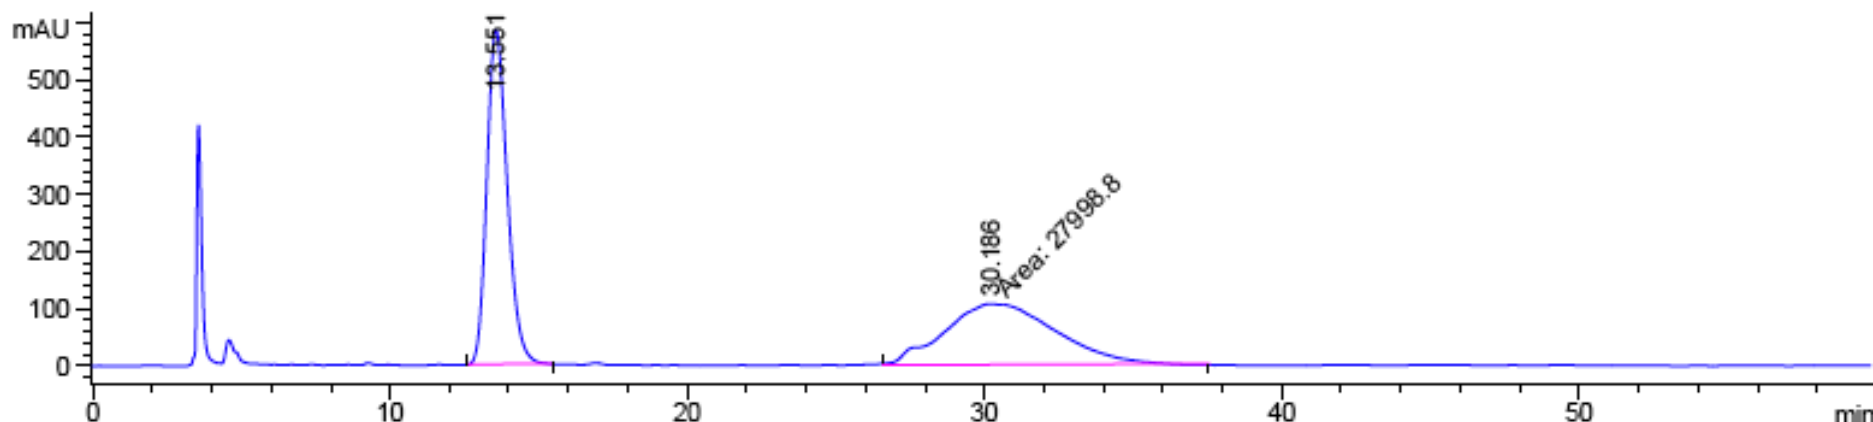

Signal 3: DAD1 C, Sig=210,8 Ref=360,100

| Peak # | RetTime [min] | Type | Width [min] | Area [mAU*s] | Height [mAU] | Area %  |
|--------|---------------|------|-------------|--------------|--------------|---------|
| 1      | 13.551        | BB   | 0.7389      | 2.80583e4    | 585.69757    | 50.0530 |
| 2      | 30.186        | MM   | 4.3487      | 2.79988e4    | 107.30796    | 49.9470 |

Totals : 5.60571e4 693.00553

S157

Sample Name: SSL7-122

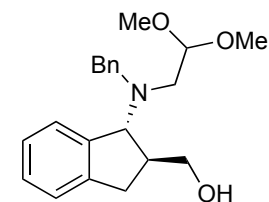

```

=====
Acq. Operator   : SSL                      Seq. Line :    1
Acq. Instrument : Instrument 1              Location  : Vial 51
Injection Date  : 7/18/2015 4:59:23 PM     Inj       :    1
                                           Inj Volume: 5 µl
Acq. Method     : C:\CHEM32\1\DATA\SSL\NAOYUKI_LC 2015-07-18 16-56-59\04-30.M
Last changed    : 7/16/2015 9:47:24 PM by SSL
Analysis Method : C:\CHEM32\1\METHODS\10-30.M
DAD1 D, Sig=220,4 Ref=360,100 (SSLNAOYUKI_LC 2015-07-18 16-56-59\SSL7-122.D)
  
```

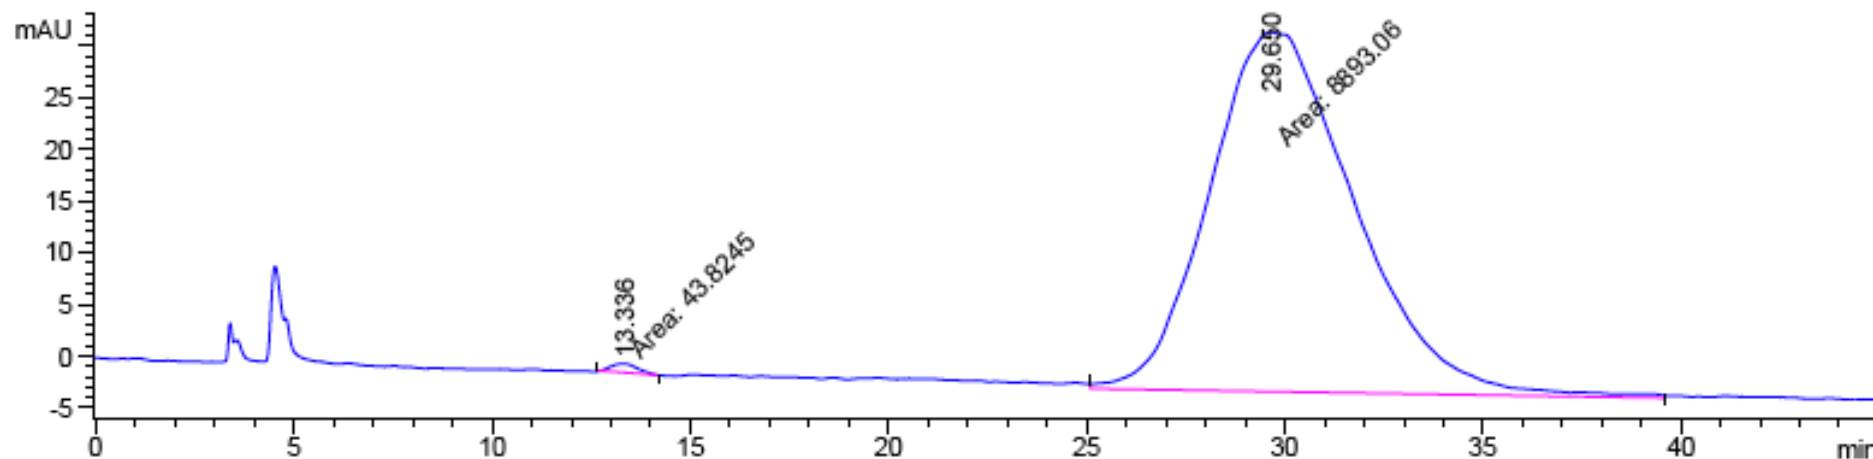

Signal 4: DAD1 D, Sig=220,4 Ref=360,100

| Peak # | RetTime [min] | Type | Width [min] | Area [mAU*s] | Height [mAU] | Area %  |
|--------|---------------|------|-------------|--------------|--------------|---------|
| 1      | 13.336        | MM   | 0.8056      | 43.82453     | 9.06692e-1   | 0.4904  |
| 2      | 29.650        | MM   | 4.2573      | 8893.06250   | 34.81514     | 99.5096 |

Totals :                      8936.88703      35.72184

Sample Name: SSL7-25C

```

=====
Acq. Operator   : SSL                      Seq. Line :    1
Acq. Instrument : Instrument 2              Location  : Vial 31
Injection Date  : 5/22/2015 7:24:37 PM    Inj       :    1
                                           Inj Volume: 5 µl
Different Inj Volume from Sequence !      Actual Inj Volume : 4 µl
Acq. Method     : C:\CHEM32\2\DATA\SSL\HPLC 2015-05-22 19-22-55\20IPA30.M
Last changed    : 5/22/2015 7:43:12 PM by SSL
                 (modified after loading)
Analysis Method : C:\CHEM32\2\METHODS\3IPA30_8.M

```

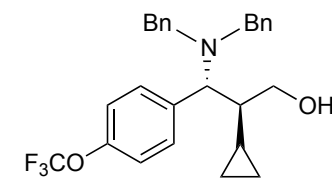

Racemic

DAD1 B, Sig=230,8 Ref=360,100 (C:\CHEM32\2\DATA\SSL\HPLC 2015-05-22 19-22-55\SSL7-25C-ODH.D)

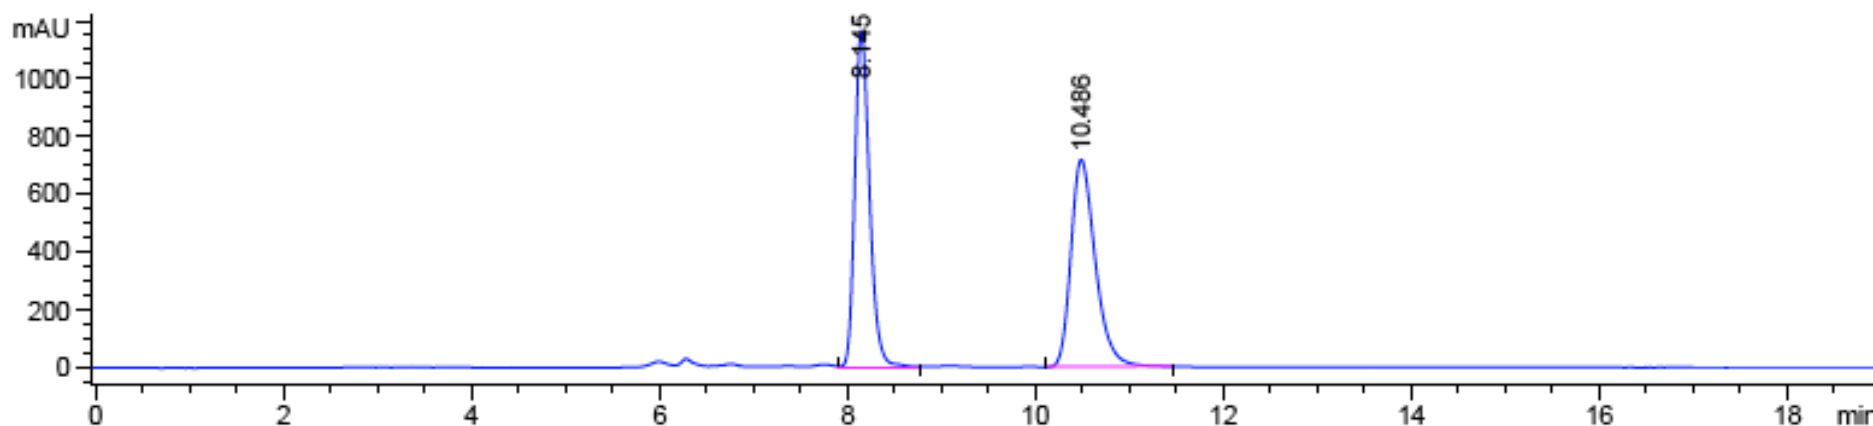

Signal 2: DAD1 B, Sig=230,8 Ref=360,100

| Peak # | RetTime [min] | Type | Width [min] | Area [mAU*s] | Height [mAU] | Area %  |
|--------|---------------|------|-------------|--------------|--------------|---------|
| 1      | 8.145         | VB   | 0.1697      | 1.27462e4    | 1164.87134   | 49.5817 |
| 2      | 10.486        | VB   | 0.2748      | 1.29613e4    | 717.34186    | 50.4183 |

Totals : 2.57076e4 1882.21320

S159

Sample Name: SSL7-63

```

=====
Acq. Operator   : SSL                      Seq. Line :    1
Acq. Instrument : Instrument 1              Location  : Vial 21
Injection Date  : 6/1/2015 8:38:19 PM      Inj       :    1
                                           Inj Volume: 5 µl
Acq. Method     : C:\CHEM32\1\DATA\SSL\NAOYUKI_LC 2015-06-01 20-35-17\20-30.M
Last changed    : 6/1/2015 7:06:36 PM by SSL
Analysis Method : C:\CHEM32\1\METHODS\MTP-HEX-1ML-MIN-90MIN.M

```

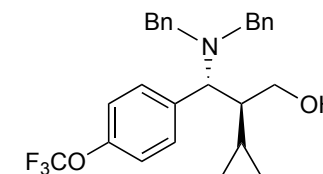

DAD1 C, Sig=210,8 Ref=360,100 (C:\CHEM32\1\DATA\SSL\NAOYUKI\_LC 2015-06-01 20-35-17\SSL7-63-ODH.D)

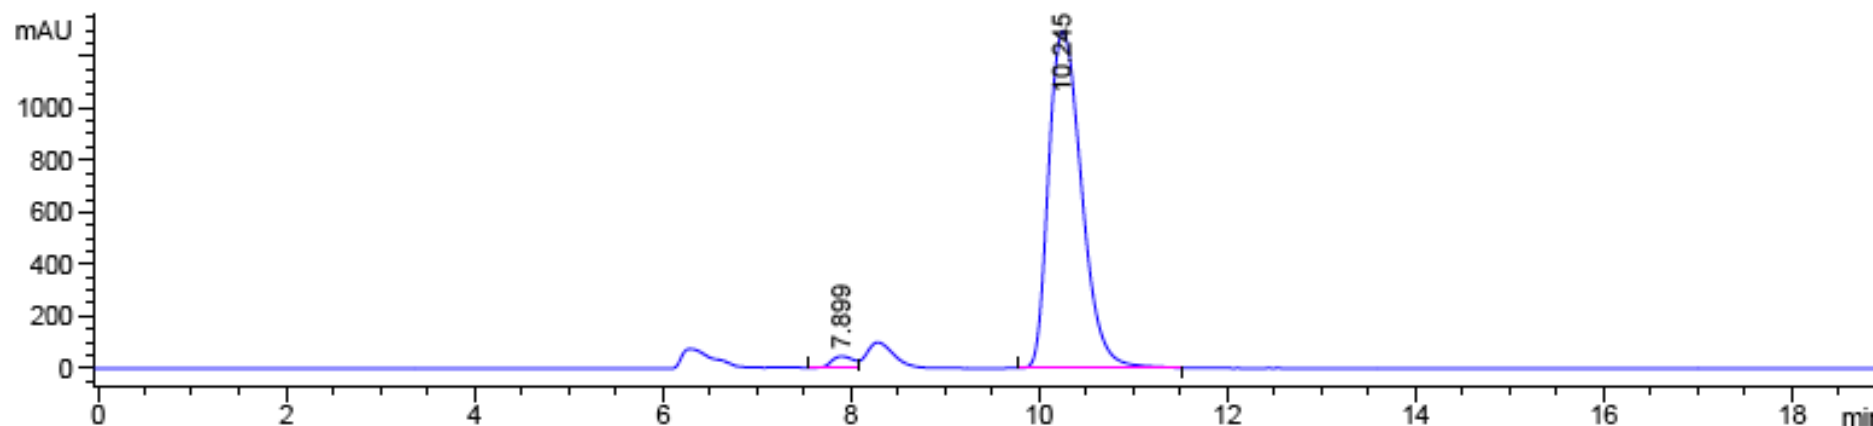

Signal 3: DAD1 C, Sig=210,8 Ref=360,100

| Peak # | RetTime [min] | Type | Width [min] | Area [mAU*s] | Height [mAU] | Area %  |
|--------|---------------|------|-------------|--------------|--------------|---------|
| 1      | 7.899         | VV   | 0.2462      | 815.64081    | 47.54229     | 2.4956  |
| 2      | 10.245        | VV   | 0.3763      | 3.18681e4    | 1298.72766   | 97.5044 |

Totals : 3.26838e4 1346.26995

S160

Sample Name: SSL-7-94

```

=====
Acq. Operator   : ZLW                               Seq. Line :    1
Acq. Instrument : Instrument 1                       Location  : Vial 31
Injection Date  : 8/24/2015 9:28:51 PM              Inj       :    1
                                                    Inj Volume: 5 µl
Acq. Method    : C:\CHEM32\1\DATA\ZLW\ATP 2015-08-24 21-27-04\20-30.M
Last changed   : 8/24/2015 8:45:47 PM by ZLW
Analysis Method: C:\CHEM32\1\METHODS\MTP-02IPA-06ML-MIN-15MIN.M
  
```

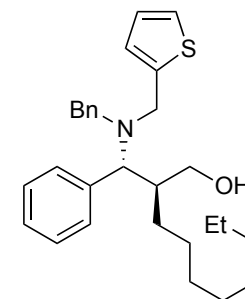

Racemic

DAD1 D, Sig=220,2 Ref=360,100 (ZLW\ATP 2015-08-24 21-27-04\SSL-7-94.D)

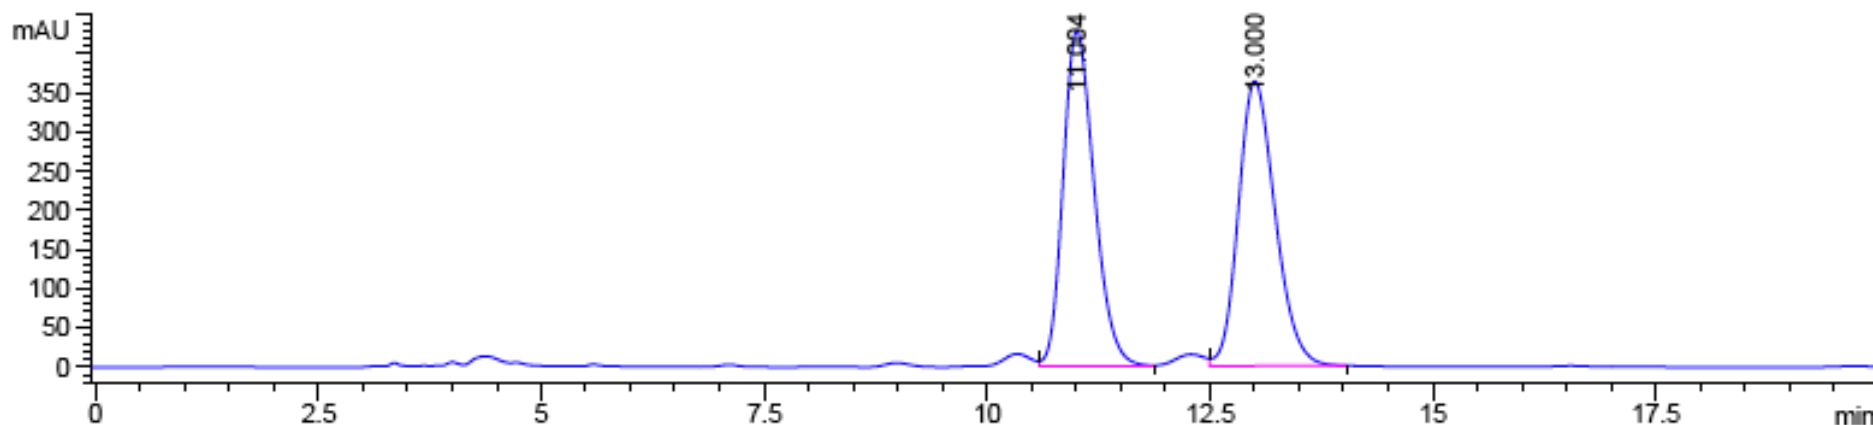

Signal 4: DAD1 D, Sig=220,2 Ref=360,100

| Peak # | RetTime [min] | Type | Width [min] | Area [mAU*s] | Height [mAU] | Area %  |
|--------|---------------|------|-------------|--------------|--------------|---------|
| 1      | 11.004        | VB   | 0.3780      | 1.04491e4    | 429.25430    | 49.9881 |
| 2      | 13.000        | VB   | 0.4428      | 1.04541e4    | 364.27774    | 50.0119 |

Sample Name: SSL7-92A

```

=====
Acq. Operator   : SSL                               Seq. Line :    1
Acq. Instrument : Instrument 1                     Location  : Vial 61
Injection Date  : 11/17/2015 12:03:52 AM          Inj       :    1
                                                    Inj Volume: 5 µl
Different Inj Volume from Sequence !      Actual Inj Volume : 2 µl
Acq. Method     : C:\CHEM32\1\DATA\SSL\NAOYUKI_LC 2015-11-17 00-02-31\02-30.M
Last changed    : 11/17/2015 12:02:45 AM by SSL

```

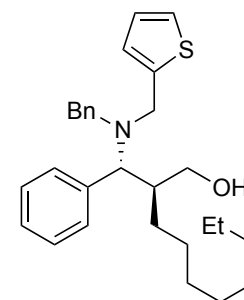

DAD1 D, Sig=220,2 Ref=360,100 (SSLNAOYUKI\_LC 2015-11-17 00-02-31\SSL7-92A.D)

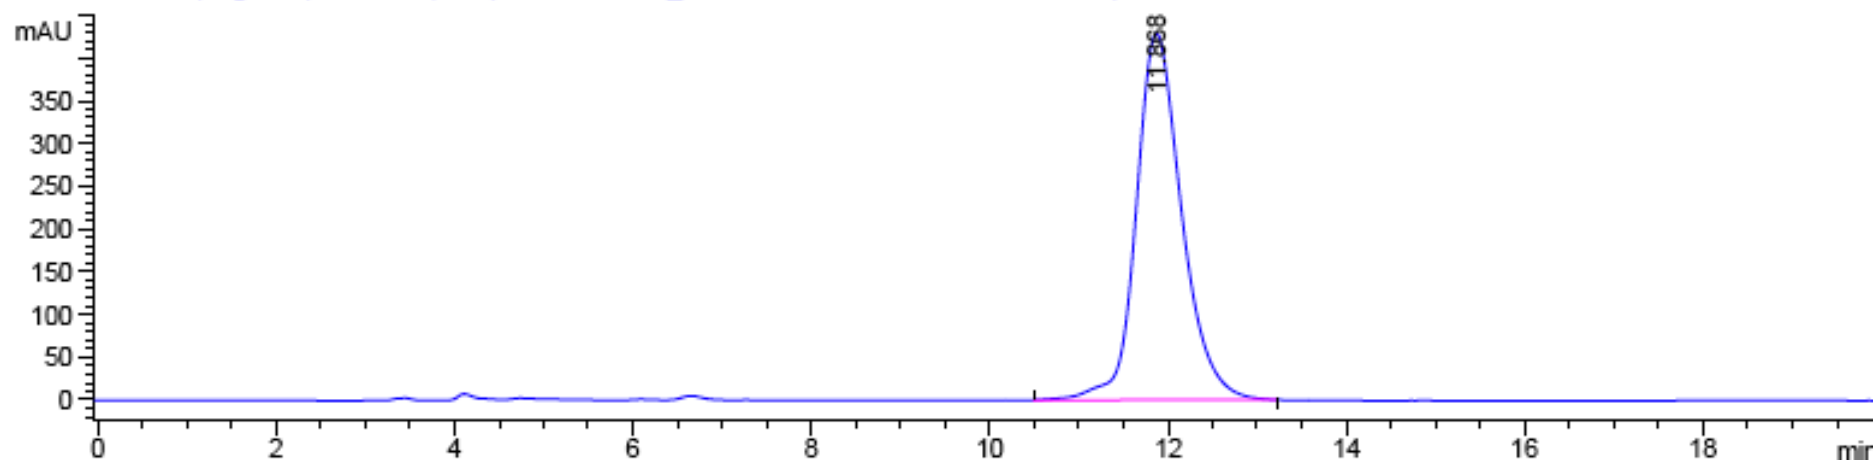

Signal 4: DAD1 D, Sig=220,2 Ref=360,100

| Peak # | RetTime [min] | Type | Width [min] | Area [mAU*s] | Height [mAU] | Area %   |
|--------|---------------|------|-------------|--------------|--------------|----------|
| 1      | 11.868        | BB   | 0.5414      | 1.52809e4    | 429.18539    | 100.0000 |

Totals :                      1.52809e4    429.18539

Sample Name: SSL7-45B

```

=====
Acq. Operator   : SSL                               Seq. Line :    1
Acq. Instrument : Instrument 1                       Location  : Vial 21
Injection Date  : 5/22/2015 5:30:00 PM             Inj       :    1
                                                    Inj Volume: 5 µl
Different Inj Volume from Sequence !      Actual Inj Volume : 2 µl
Acq. Method    : C:\CHEM32\1\DATA\SSL\NAOYUKI_LC 2015-05-22 17-27-47\20-50.M
Last changed   : 5/22/2015 5:37:09 PM by SSL
                (modified after loading)
Analysis Method : C:\CHEM32\1\METHODS\03-30.M
  
```

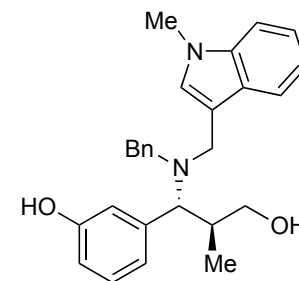

Racemic

DAD1 D, Sig=220,2 Ref=360,100 (C:\CHEM32\1\DATA\SSL\NAOYUKI\_LC 2015-05-22 17-27-47\SSL7-45B-IA.D)

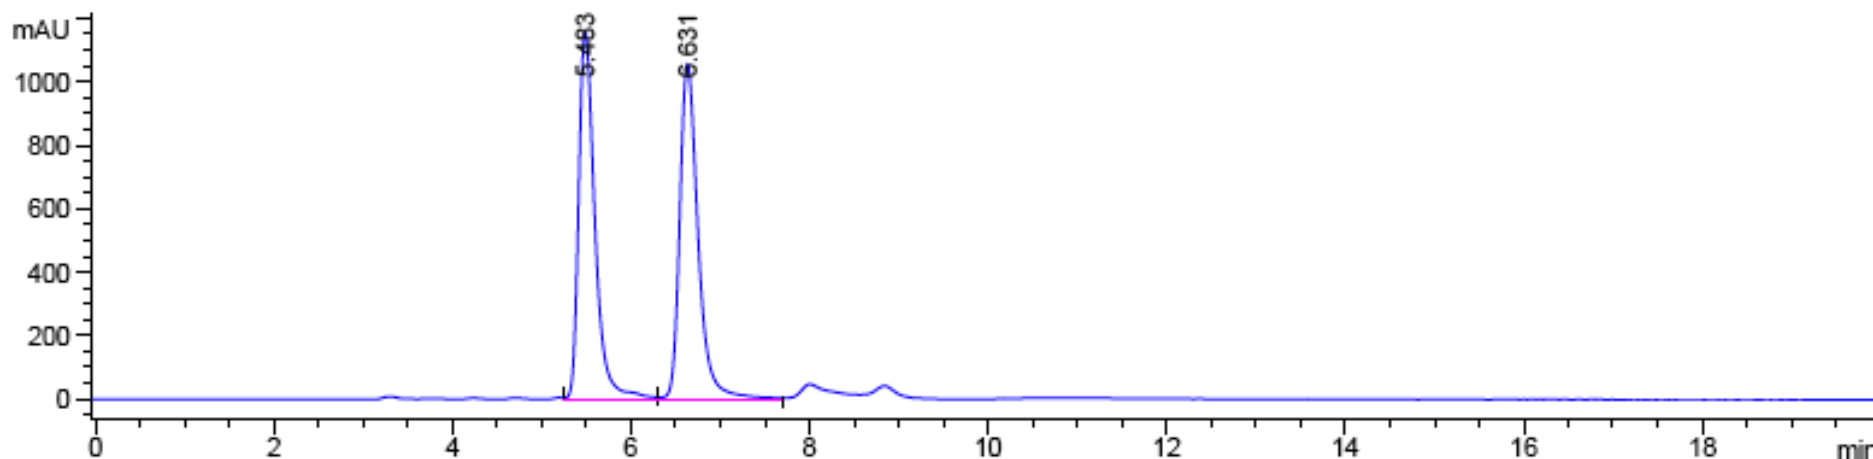

Signal 4: DAD1 D, Sig=220,2 Ref=360,100

| Peak # | RetTime [min] | Type | Width [min] | Area [mAU*s] | Height [mAU] | Area %  |
|--------|---------------|------|-------------|--------------|--------------|---------|
| 1      | 5.483         | VV   | 0.1942      | 1.47106e4    | 1158.29565   | 49.2134 |
| 2      | 6.631         | VB   | 0.2196      | 1.51808e4    | 1056.44556   | 50.7866 |

Totals : 2.98914e4 2214.74121

S163

Sample Name: SSL7-58-S

```

=====
Acq. Operator   : SSL                               Seq. Line :    1
Acq. Instrument : Instrument 1                     Location  : Vial 31
Injection Date  : 5/27/2015 10:35:39 PM          Inj       :    1
                                                    Inj Volume: 5 µl

Different Inj Volume from Sequence !      Actual Inj Volume : 1 µl
Acq. Method    : C:\CHEM32\1\DATA\SSL\NAOYUKI_LC 2015-05-27 22-32-53\20-30.M
Last changed   : 5/27/2015 10:33:23 PM by SSL
                (modified after loading)
Analysis Method : C:\CHEM32\1\METHODS\03-30.M
  
```

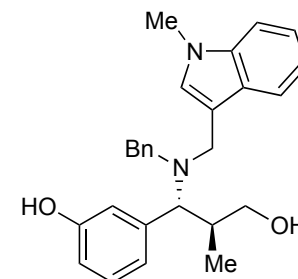

DAD1 D, Sig=220,2 Ref=360,100 (C:\CHEM32\1\DATA\SSL\NAOYUKI\_LC 2015-05-27 22-32-53\SSL7-58-S.D)

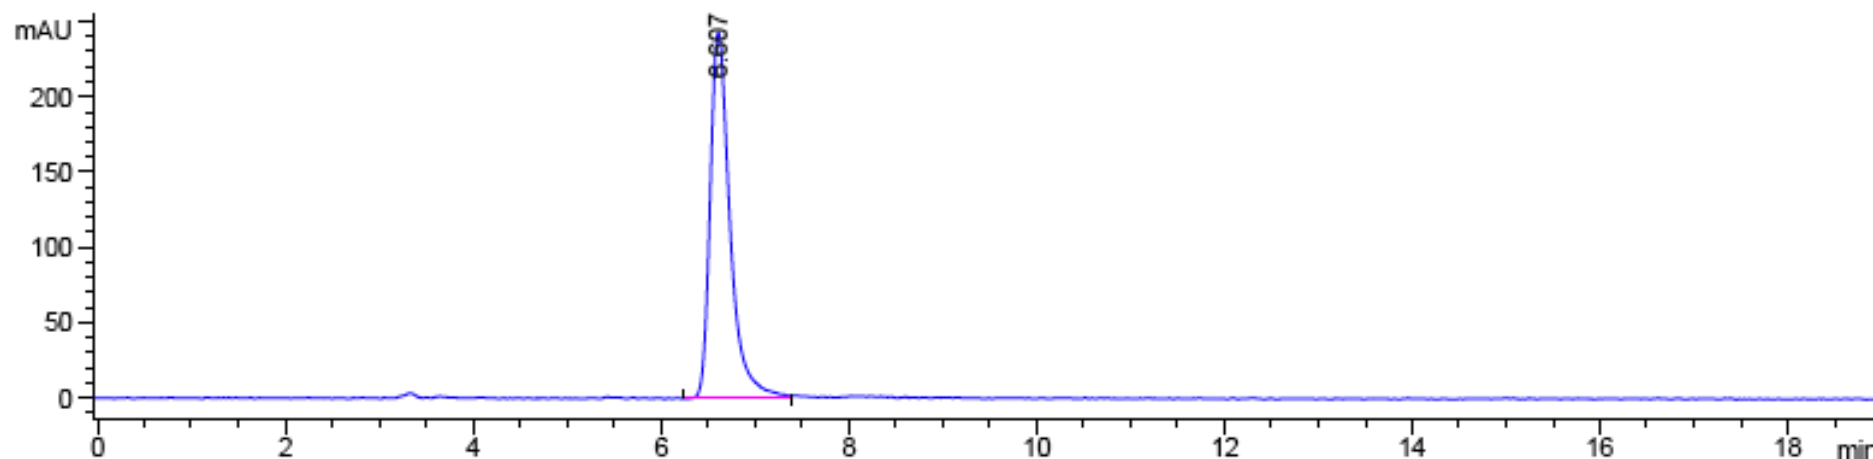

Signal 4: DAD1 D, Sig=220,2 Ref=360,100

| Peak # | RetTime [min] | Type | Width [min] | Area [mAU*s] | Height [mAU] | Area %   |
|--------|---------------|------|-------------|--------------|--------------|----------|
| 1      | 6.607         | VB   | 0.2255      | 3621.96558   | 243.49930    | 100.0000 |

Totals : 3621.96558 243.49930



Sample Name: SSL7-46A

```

=====
Acq. Operator   : SSL                      Seq. Line :    1
Acq. Instrument : Instrument 1              Location  : Vial 22
Injection Date  : 6/2/2015 5:13:06 PM     Inj       :    1
                                           Inj Volume: 5 µl
Different Inj Volume from Sequence !      Actual Inj Volume : 3 µl
Acq. Method    : C:\CHEM32\1\DATA\SSL\NAOYUKI_LC 2015-06-02 17-10-11\20-30.M
Last changed   : 6/2/2015 5:26:27 PM by SSL
                                           (modified after loading)

```

Analysis Method : C:\CHEM32\1\METHODS\MTP-HEX-1ML-MIN-90MIN.M

DAD1 A, Sig=230,4 Ref=360,100 (C:\CHEM32\1\DATA\SSL\NAOYUKI\_LC 2015-06-02 17-10-11\SSL7-46A.D)

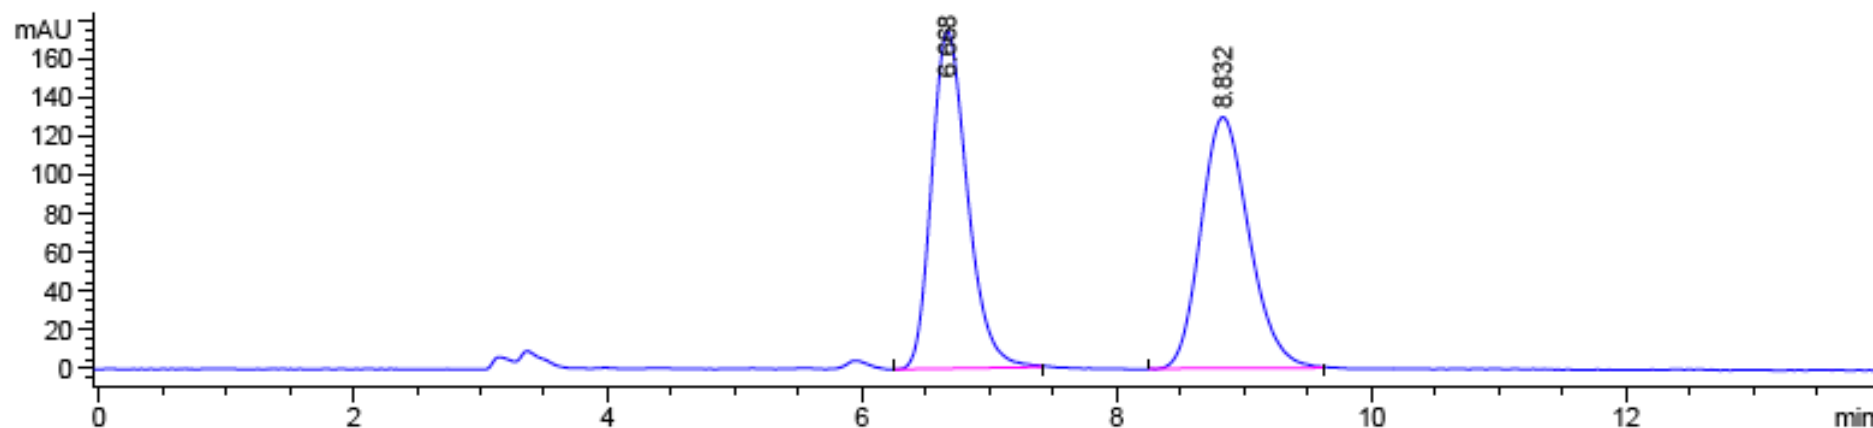

Signal 1: DAD1 A, Sig=230,4 Ref=360,100

| Peak # | RetTime [min] | Type | Width [min] | Area [mAU*s] | Height [mAU] | Area %  |
|--------|---------------|------|-------------|--------------|--------------|---------|
| 1      | 6.668         | VB   | 0.3029      | 3432.37915   | 174.91112    | 50.0005 |
| 2      | 8.832         | BB   | 0.3976      | 3432.30762   | 130.17195    | 49.9995 |

Totals : 6864.68677 305.08307

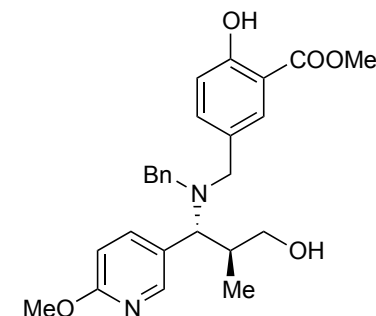

Racemic

Sample Name: SSL7-70

```

=====
Acq. Operator   : SSL                               Seq. Line :    1
Acq. Instrument : Instrument 2                       Location  : Vial 21
Injection Date  : 6/3/2015 2:25:51 PM              Inj       :    1
                                                    Inj Volume: 5 µl

Acq. Method     : C:\CHEM32\2\DATA\SSL\HPLC 2015-06-03 14-23-53\20IPA30.M
Last changed    : 6/3/2015 2:24:14 PM by SSL
                  (modified after loading)

Analysis Method : C:\CHEM32\2\METHODS\3IPA30_8.M
                  DAD1 A, Sig=254,4 Ref=360,100 (C:\CHEM32\2\DATA\SSL\HPLC 2015-06-03 14-23-53\SSL7-70.D)

```

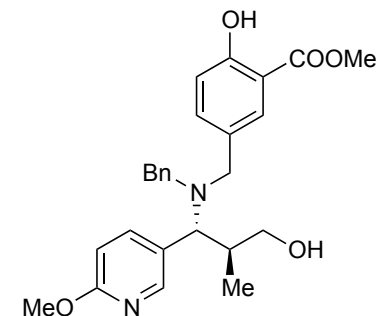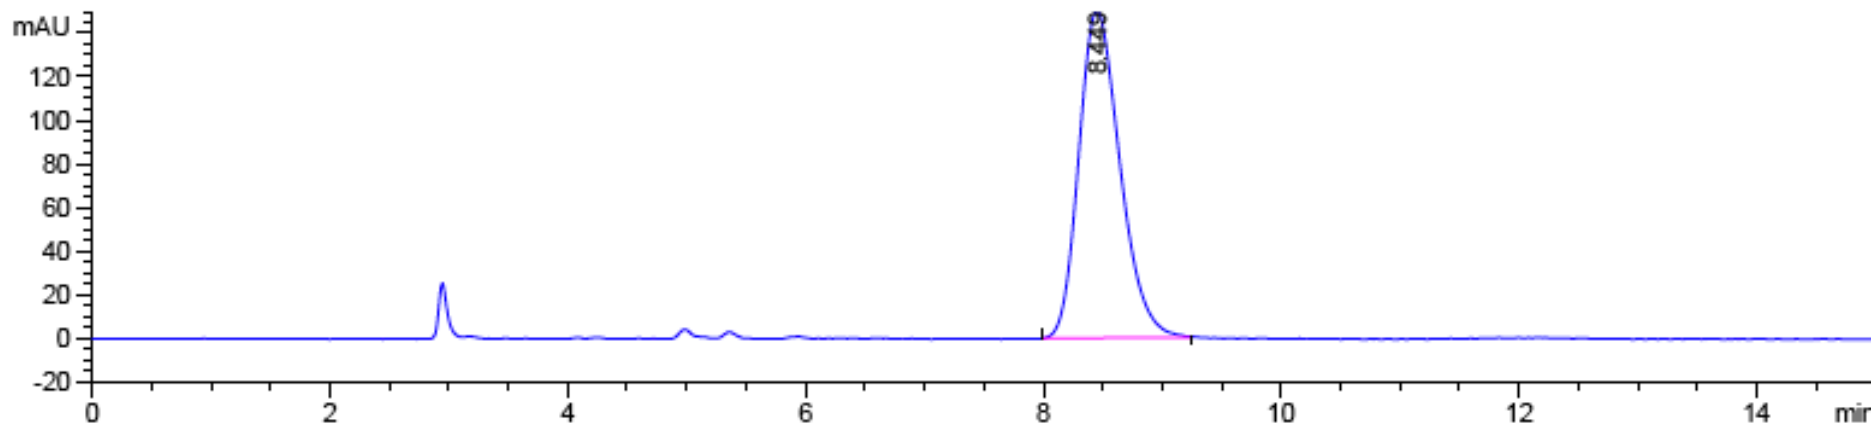

Signal 1: DAD1 A, Sig=254,4 Ref=360,100

| Peak # | RetTime [min] | Type | Width [min] | Area [mAU*s] | Height [mAU] | Area %   |
|--------|---------------|------|-------------|--------------|--------------|----------|
| 1      | 8.449         | BB   | 0.3751      | 3616.82080   | 150.08784    | 100.0000 |

Totals :                                    3616.82080    150.08784

Sample Name: SSL7-67AF-3

```

=====
Acq. Operator   : SSL                               Seq. Line :    1
Acq. Instrument : Instrument 1                       Location  : Vial 61
Injection Date  : 7/9/2015 5:55:01 PM              Inj       :    1
                                                    Inj Volume: 5 µl
Different Inj Volume from Sequence !      Actual Inj Volume : 2 µl
Acq. Method     : C:\CHEM32\1\DATA\SSL\HPLC 2015-07-09 17-53-39\15-60.M
Last changed    : 7/9/2015 5:53:38 PM by SSL
Analysis Method : C:\CHEM32\1\METHODS\10-30.M
  
```

DAD1 D, Sig=220,2 Ref=360,100 (SSLHPLC 2015-07-09 17-53-39\SSL7-67AF-3-ODH.D)

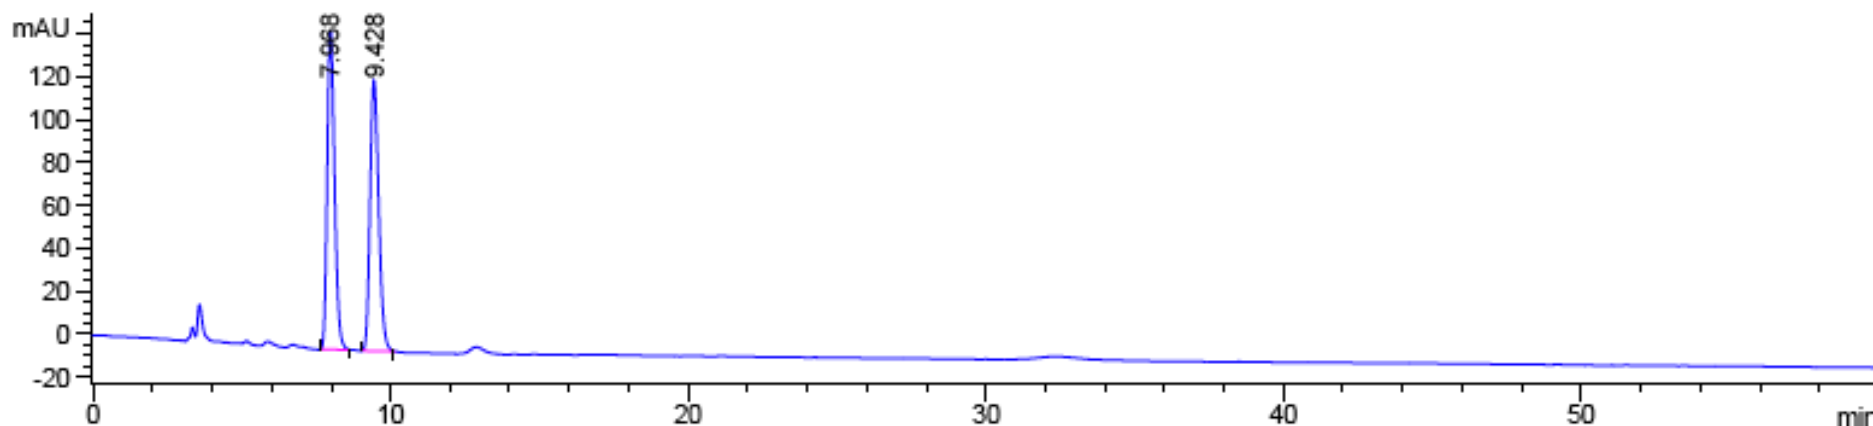

Signal 4: DAD1 D, Sig=220,2 Ref=360,100

| Peak # | RetTime [min] | Type | Width [min] | Area [mAU*s] | Height [mAU] | Area %  |
|--------|---------------|------|-------------|--------------|--------------|---------|
| 1      | 7.968         | BB   | 0.2675      | 2565.93481   | 148.53487    | 50.0239 |
| 2      | 9.428         | BB   | 0.3149      | 2563.47925   | 126.23434    | 49.9761 |

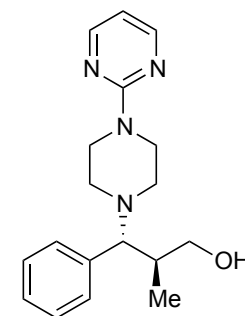

Racemic

Sample Name: SSL7-98

```

=====
Acq. Operator   : SSL                      Seq. Line :    1
Acq. Instrument : Instrument 1              Location  : Vial 51
Injection Date  : 7/20/2015 9:05:10 PM    Inj       :    1
                                           Inj Volume: 5 µl
Different Inj Volume from Sequence !      Actual Inj Volume : 2 µl
Acq. Method     : C:\CHEM32\1\DATA\SSL\NAOYUKI_LC 2015-07-20 21-02-44\15-30.M
Last changed    : 7/20/2015 9:02:42 PM by SSL
Analysis Method : C:\CHEM32\1\METHODS\10-30.M

```

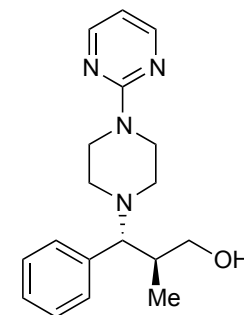

DAD1 D, Sig=220,2 Ref=360,100 (SSLNAOYUKI\_LC 2015-07-20 21-02-44\SSL7-98.D)

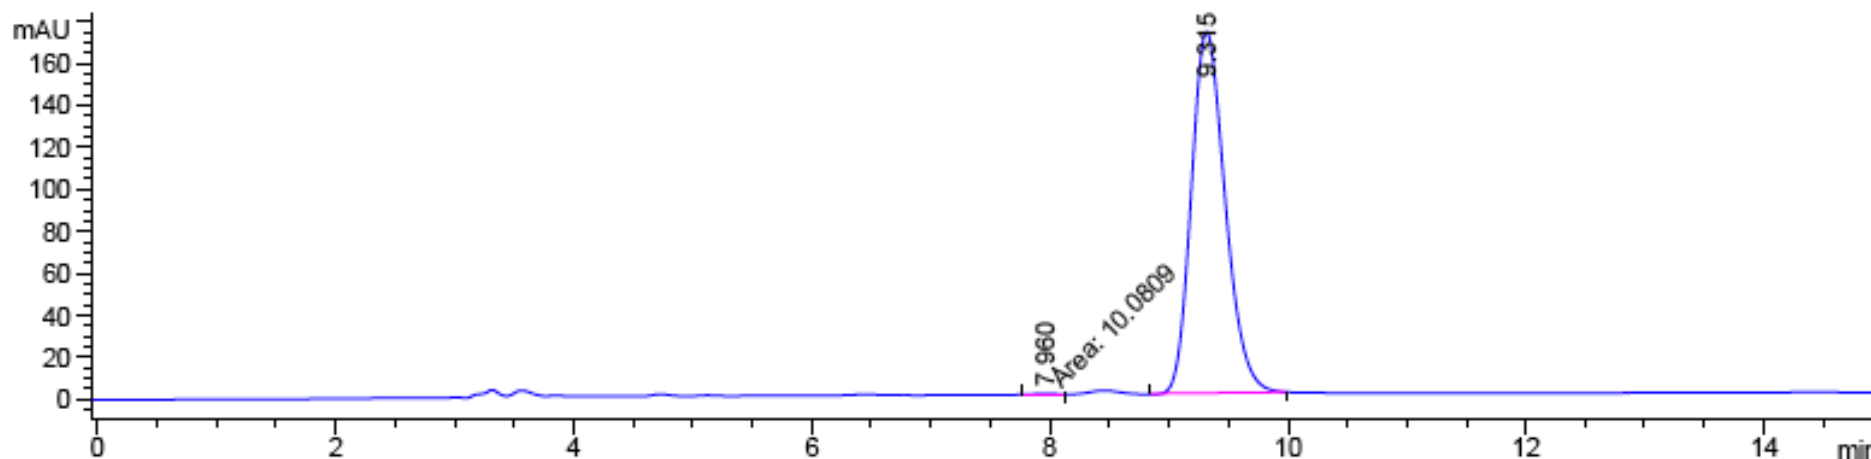

Signal 4: DAD1 D, Sig=220,2 Ref=360,100

| Peak # | RetTime [min] | Type | Width [min] | Area [mAU*s] | Height [mAU] | Area %  |
|--------|---------------|------|-------------|--------------|--------------|---------|
| 1      | 7.960         | MM   | 0.2805      | 10.08085     | 5.99029e-1   | 0.2947  |
| 2      | 9.315         | VB   | 0.3075      | 3410.31519   | 171.83650    | 99.7053 |

Totals : 3420.39604 172.43553

S168

Sample Name: SSL7-88AF1

```

=====
Acq. Operator   : SSL                      Seq. Line :    1
Acq. Instrument : Instrument 1              Location  : Vial 61
Injection Date  : 7/11/2015 7:27:12 PM    Inj       :    1
                                           Inj Volume: 5 µl
Different Inj Volume from Sequence !      Actual Inj Volume : 0.6 µl
Acq. Method     : C:\CHEM32\1\DATA\SSL\HPLC 2015-07-11 19-25-51\04-30.M
Last changed    : 7/11/2015 7:45:21 PM by SSL
                                           (modified after loading)
Analysis Method : C:\CHEM32\1\METHODS\10-30.M
  
```

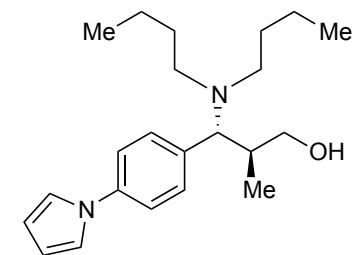

Racemic

DAD1 B, Sig=254,8 Ref=360,100 (SSLHPLC 2015-07-11 19-25-51\SSL7-88AF1-IA.D)

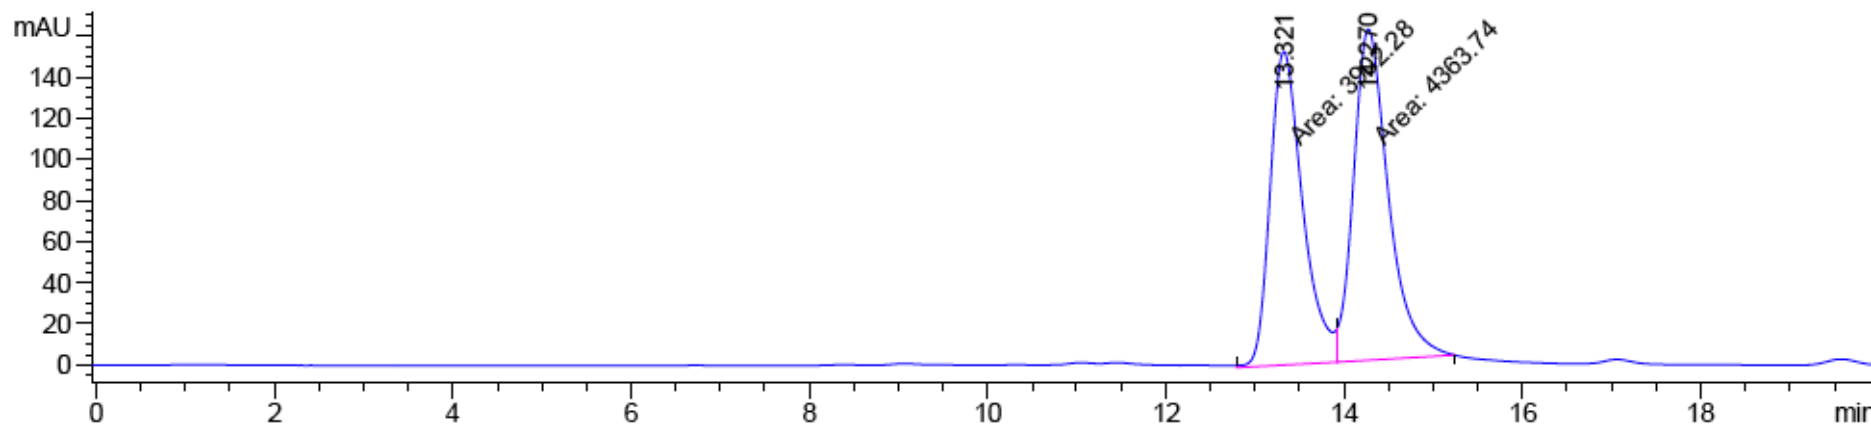

Signal 2: DAD1 B, Sig=254,8 Ref=360,100

| Peak # | RetTime [min] | Type | Width [min] | Area [mAU*s] | Height [mAU] | Area %  |
|--------|---------------|------|-------------|--------------|--------------|---------|
| 1      | 13.321        | MF   | 0.4264      | 3902.27783   | 152.51146    | 47.2087 |
| 2      | 14.270        | FM   | 0.4521      | 4363.73975   | 160.86070    | 52.7913 |

Totals : 8266.01758 313.37216



Sample Name: SSL7-47A

```

=====
Acq. Operator   : SSL                               Seq. Line :    2
Acq. Instrument : Instrument 2                       Location  : Vial 52
Injection Date  : 5/22/2015 6:59:35 PM             Inj       :    1
                                                    Inj Volume: 5 µl
Different Inj Volume from Sequence !      Actual Inj Volume : 4 µl
Acq. Method    : C:\CHEM32\2\DATA\SSL\HPLC 2015-05-22 18-25-52\20IPA30.M
Last changed   : 5/22/2015 7:18:45 PM by SSL
                (modified after loading)
Analysis Method : C:\CHEM32\2\METHODS\3IPA30_8.M

```

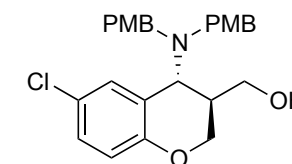

Racemic

DAD1 B, Sig=230,8 Ref=360,100 (C:\CHEM32\2\DATA\SSL\HPLC 2015-05-22 18-25-52\SSL7-47A-ODH.D)

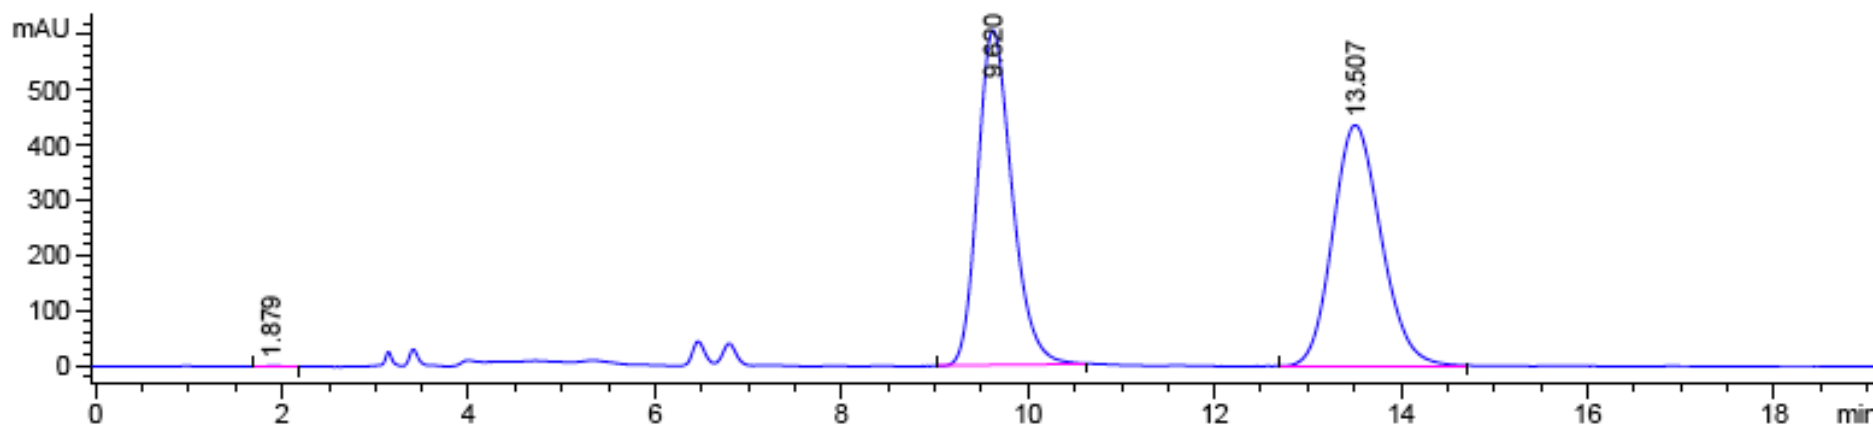

Signal 2: DAD1 B, Sig=230,8 Ref=360,100

| Peak # | RetTime [min] | Type | Width [min] | Area [mAU*s] | Height [mAU] | Area %  |
|--------|---------------|------|-------------|--------------|--------------|---------|
| 1      | 1.879         | BB   | 0.1961      | 17.52534     | 1.07572      | 0.0559  |
| 2      | 9.620         | BB   | 0.3981      | 1.56087e4    | 606.73492    | 49.7603 |
| 3      | 13.507        | BB   | 0.5572      | 1.57415e4    | 436.00745    | 50.1838 |

Totals : 3.13677e4 1043.81810

S171





Sample Name: SSL7-144

```

=====
Acq. Operator   : SSL                               Seq. Line :    1
Acq. Instrument : Instrument 1                       Location  : Vial 81
Injection Date  : 7/28/2015 3:32:24 PM             Inj       :    1
                                                    Inj Volume: 5 µl
Different Inj Volume from Sequence !   Actual Inj Volume : 10 µl
Acq. Method    : C:\CHEM32\1\DATA\SSL\NAOYUKI_LC 2015-07-28 15-30-09\01-30.M
Last changed   : 7/28/2015 3:30:07 PM by SSL
Analysis Method: C:\CHEM32\1\METHODS\10-30.M
  
```

DAD1 D, Sig=220,2 Ref=360,100 (SSLNAOYUKI\_LC 2015-07-28 15-30-09\SSL7-144.D)

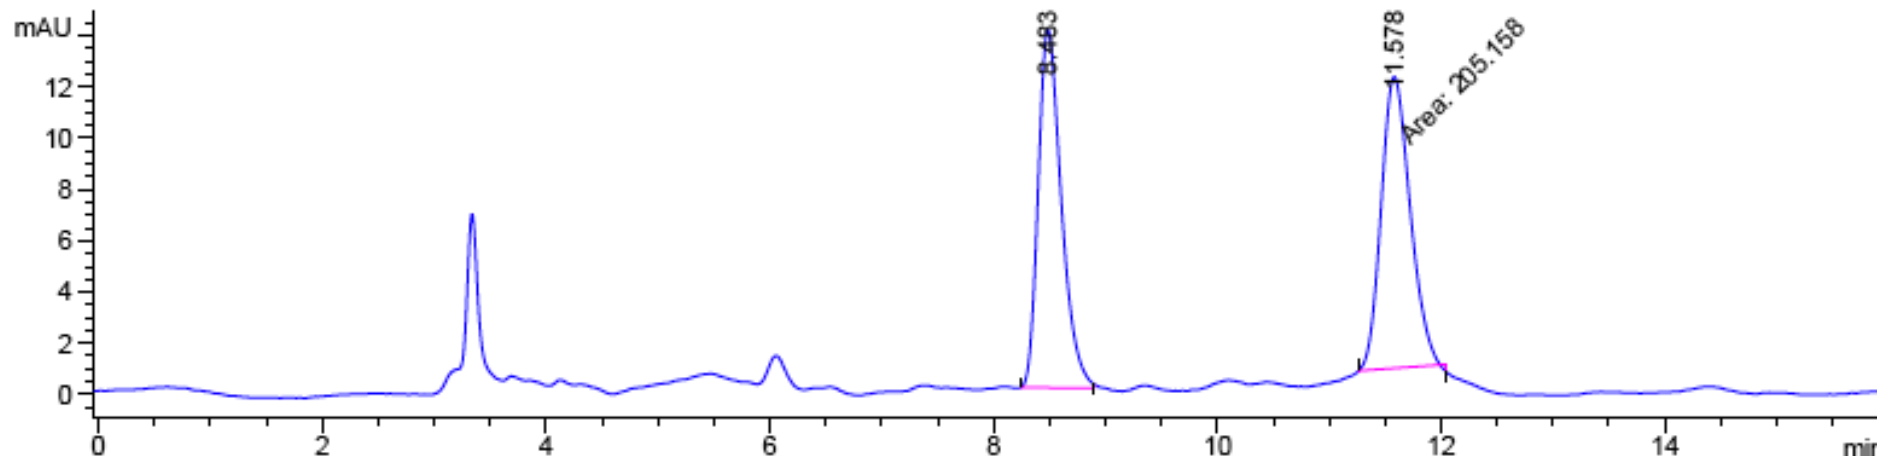

Signal 4: DAD1 D, Sig=220,2 Ref=360,100

| Peak # | RetTime [min] | Type | Width [min] | Area [mAU*s] | Height [mAU] | Area %  |
|--------|---------------|------|-------------|--------------|--------------|---------|
| 1      | 8.483         | BB   | 0.2202      | 201.46289    | 13.97519     | 49.5456 |
| 2      | 11.578        | MM   | 0.3002      | 205.15820    | 11.39025     | 50.4544 |

Totals : 406.62109 25.36544

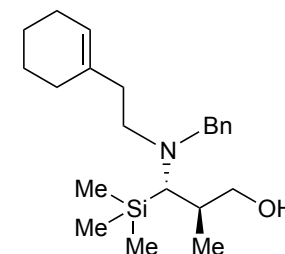

Racemic

Sample Name: SSL7-146

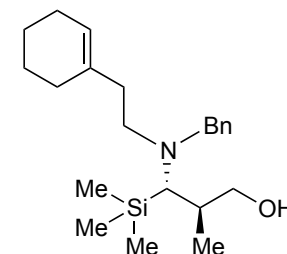

```

=====
Acq. Operator   : SSL                      Seq. Line :    1
Acq. Instrument : Instrument 1              Location  : Vial 51
Injection Date  : 7/29/2015 4:22:15 PM    Inj       :    1
                                           Inj Volume: 5 µl

Different Inj Volume from Sequence !      Actual Inj Volume : 0.4 µl
Acq. Method    : C:\CHEM32\1\DATA\SSL\ATP 2015-07-29 16-21-06\01-30.M
Last changed   : 7/29/2015 3:59:49 PM by SSL
Analysis Method: C:\CHEM32\1\METHODS\10-30.M
  
```

DAD1 D, Sig=220,2 Ref=360,100 (SSLATP 2015-07-29 16-21-06SSL7-146.D)

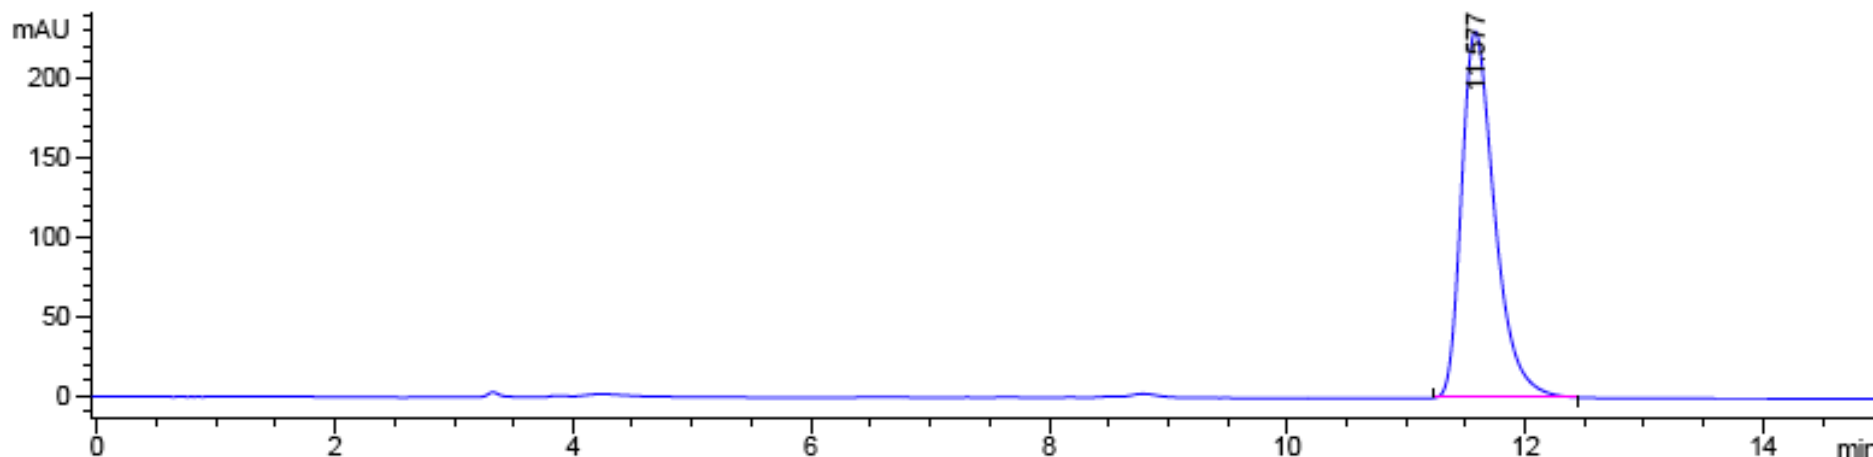

Signal 4: DAD1 D, Sig=220,2 Ref=360,100

| Peak # | RetTime [min] | Type | Width [min] | Area [mAU*s] | Height [mAU] | Area %   |
|--------|---------------|------|-------------|--------------|--------------|----------|
| 1      | 11.577        | BB   | 0.2960      | 4468.81299   | 230.67110    | 100.0000 |

Totals : 4468.81299 230.67110

Sample Name: SSL7-48B

```

=====
Acq. Operator   : SSL                      Seq. Line :    1
Acq. Instrument : Instrument 1              Location  : Vial 51
Injection Date  : 7/23/2015 7:14:47 PM    Inj       :    1
                                           Inj Volume: 5 µl
Different Inj Volume from Sequence !      Actual Inj Volume : 2 µl
Acq. Method     : C:\CHEM32\1\DATA\SSL\NAOYUKI_LC 2015-07-23 19-12-40\10-60.M
Last changed    : 7/23/2015 7:12:38 PM by SSL
Analysis Method : C:\CHEM32\1\METHODS\10-30.M
Last changed    : 7/21/2015 11:12:38 AM by SSL

```

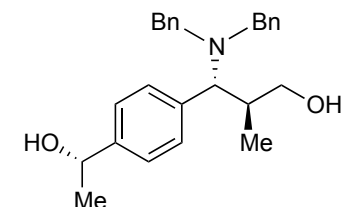

Racemic

DAD1 D, Sig=220,2 Ref=360,100 (SSL\NAOYUKI\_LC 2015-07-23 19-12-40\SSL7-48B.D)

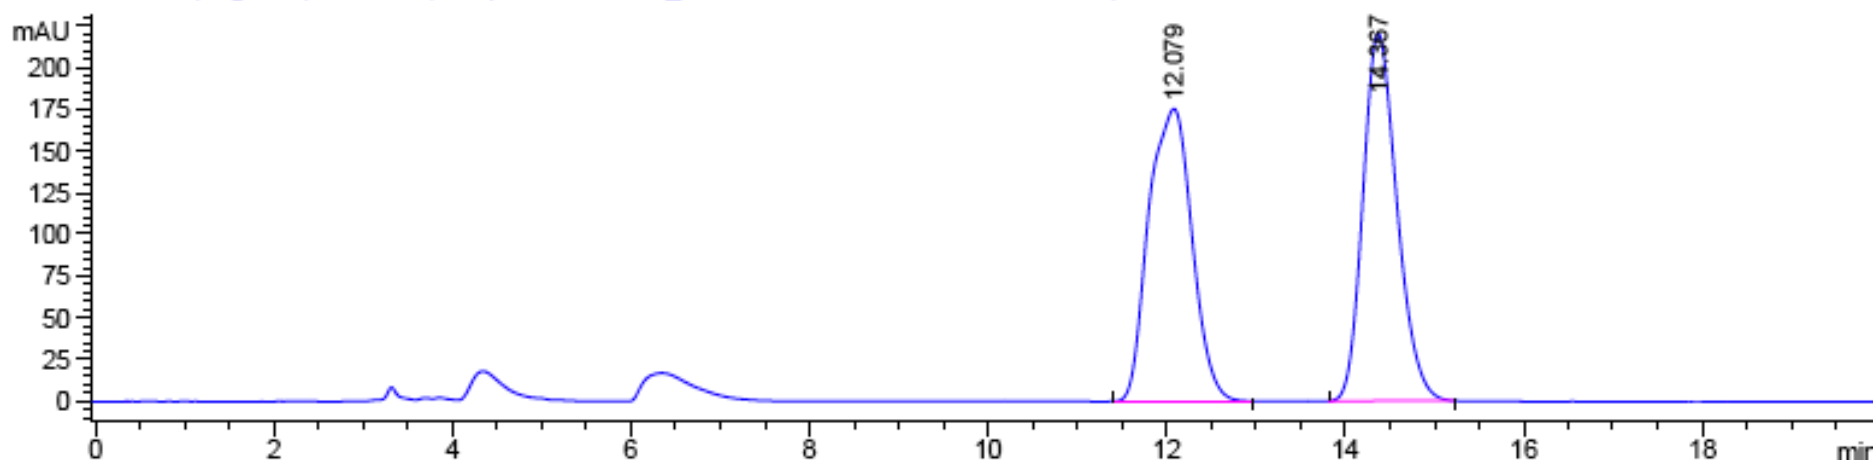

Signal 4: DAD1 D, Sig=220,2 Ref=360,100

| Peak # | RetTime [min] | Type | Width [min] | Area [mAU*s] | Height [mAU] | Area %  |
|--------|---------------|------|-------------|--------------|--------------|---------|
| 1      | 12.079        | BB   | 0.4755      | 5911.72021   | 175.27214    | 50.2372 |
| 2      | 14.367        | BB   | 0.4102      | 5855.89014   | 220.21692    | 49.7628 |

Totals : 1.17676e4 395.48906

S175

Sample Name: ZLW-2-37

```

=====
Acq. Operator   : ZLW                      Seq. Line :    1
Acq. Instrument : Instrument 1              Location  : Vial 31
Injection Date  : 9/12/2015 4:46:41 PM    Inj       :    1
                                           Inj Volume: 2 µl
Different Inj Volume from Sequence !      Actual Inj Volume : 5 µl
Acq. Method     : C:\CHEM32\1\DATA\ZLW\ATP 2015-09-12 16-44-34\10-30.M
Last changed    : 9/12/2015 4:44:33 PM by ZLW
Analysis Method : C:\CHEM32\1\DATA\ZLW\ATP 2015-09-12 16-44-34\ZLW-2-37.D\DA.M (10-30.M)

```

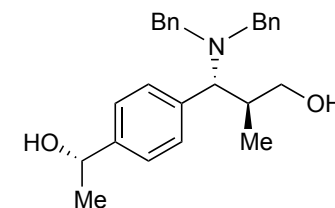

DAD1 D, Sig=220,2 Ref=360,100 (ZLW\ATP 2015-09-12 16-44-34\ZLW-2-37.D)

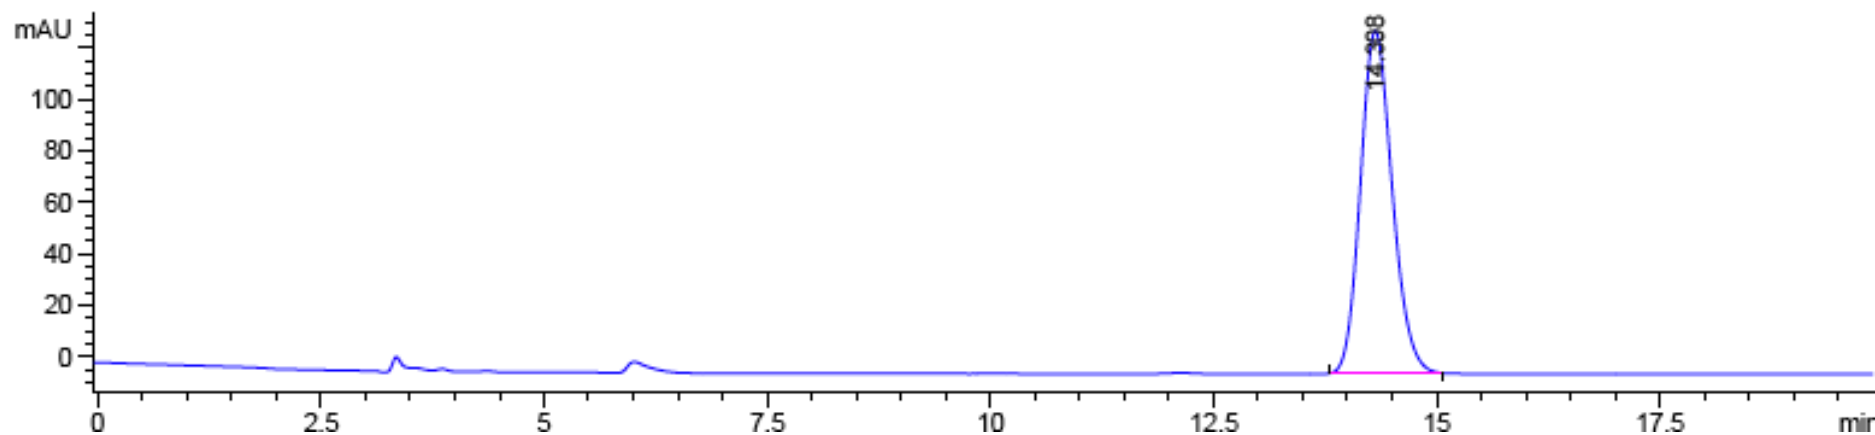

Signal 2: DAD1 D, Sig=220,2 Ref=360,100

| Peak # | RetTime [min] | Type | Width [min] | Area [mAU*s] | Height [mAU] | Area %   |
|--------|---------------|------|-------------|--------------|--------------|----------|
| 1      | 14.308        | BB   | 0.3854      | 3307.25684   | 133.34019    | 100.0000 |

Totals :                                    3307.25684    133.34019

Sample Name: SSL6-89B

```

=====
Acq. Operator   : SSL                               Seq. Line :    1
Acq. Instrument : Instrument 1                       Location  : Vial 61
Injection Date  : 11/21/2014 7:31:05 PM           Inj       :    1
                                                    Inj Volume: 5 µl
Different Inj Volume from Sequence !      Actual Inj Volume : 2 µl
Acq. Method     : C:\CHEM32\1\DATA\SSL\NAOYUKI_LC 2014-11-21 19-28-56\02-60.M
Last changed    : 11/21/2014 7:49:28 PM by SSL
                  (modified after loading)
Analysis Method : C:\CHEM32\1\METHODS\10-30.M
  
```

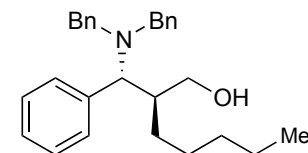

Racemic

DAD1 A, Sig=230,4 Ref=360,100 (SSL\NAOYUKI\_LC 2014-11-21 19-28-56\SSL6-89B-E-RAC.D)

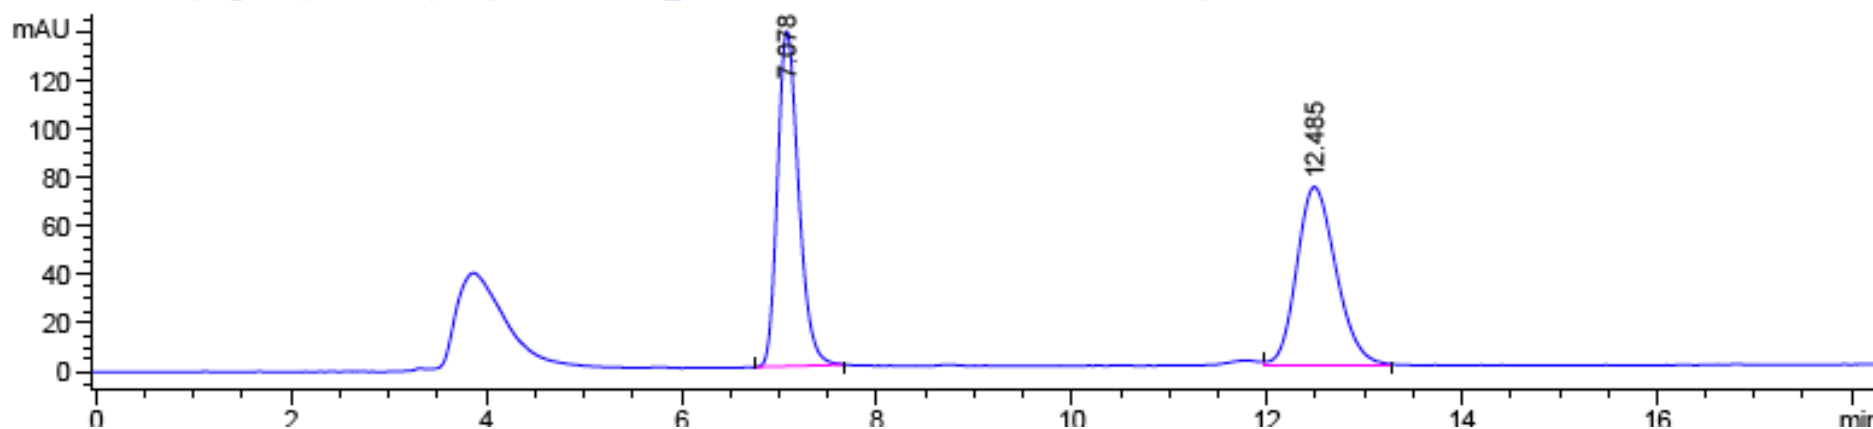

Signal 1: DAD1 A, Sig=230,4 Ref=360,100

| Peak # | RetTime [min] | Type | Width [min] | Area [mAU*s] | Height [mAU] | Area %  |
|--------|---------------|------|-------------|--------------|--------------|---------|
| 1      | 7.078         | BB   | 0.2324      | 2093.13989   | 138.41605    | 50.4448 |
| 2      | 12.485        | VB   | 0.4357      | 2056.22437   | 73.64745     | 49.5552 |

Totals : 4149.36426 212.06349

S177

Sample Name: SSL7-148

```

=====
Acq. Operator   : SSL                               Seq. Line :    1
Acq. Instrument : Instrument 1                     Location  : Vial 21
Injection Date  : 8/10/2015 4:38:07 PM           Inj       :    1
                                                    Inj Volume: 5 µl
Different Inj Volume from Sequence !      Actual Inj Volume : 0.4 µl
Acq. Method    : C:\CHEM32\1\DATA\SSL\ATP 2015-08-10 16-36-55\02-60.M
Last changed   : 8/10/2015 3:53:29 PM by SSL
Analysis Method: C:\CHEM32\1\METHODS\10-30.M

```

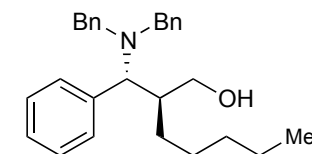

DAD1 A, Sig=230,4 Ref=360,100 (SSLATP 2015-08-10 16-36-55\SSL7-148.D)

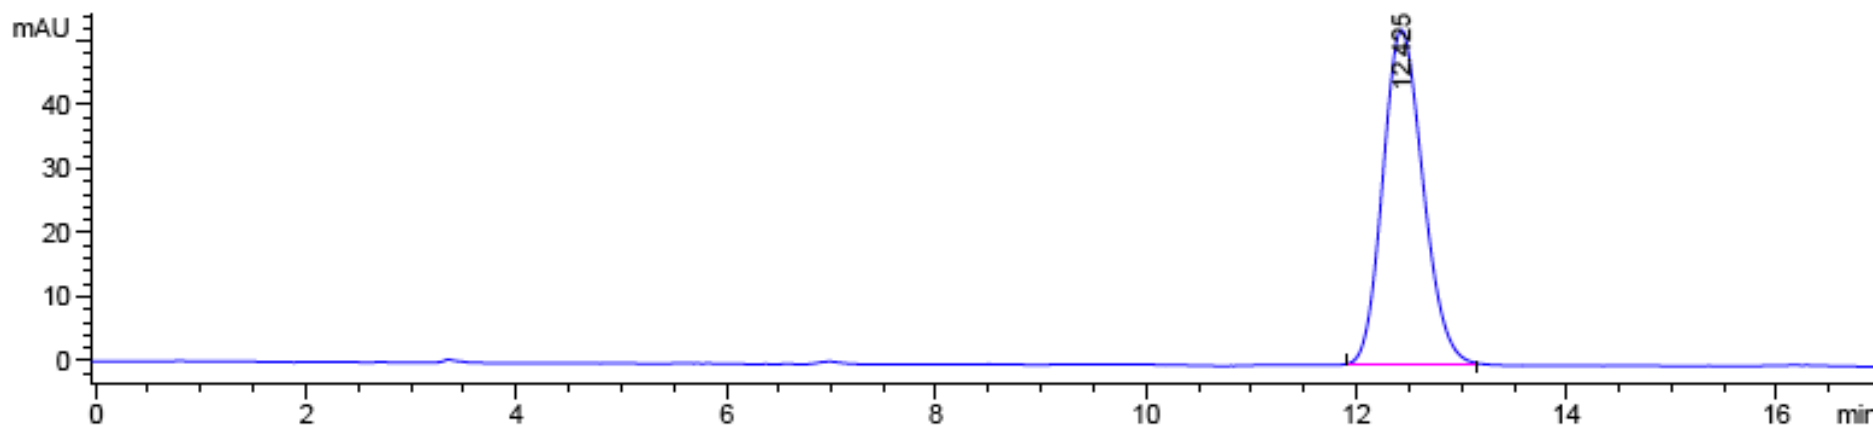

Signal 1: DAD1 A, Sig=230,4 Ref=360,100

| Peak # | RetTime [min] | Type | Width [min] | Area [mAU*s] | Height [mAU] | Area %   |
|--------|---------------|------|-------------|--------------|--------------|----------|
| 1      | 12.425        | BB   | 0.4126      | 1394.11951   | 52.36597     | 100.0000 |

Totals :                    1394.11951    52.36597

Sample Name: SSL7-155

```

=====
Acq. Operator   : SSL                               Seq. Line :    2
Acq. Instrument : Instrument 1                       Location  : Vial 41
Injection Date  : 8/4/2015 4:03:35 PM              Inj       :    1
                                                    Inj Volume: 5 µl

Different Inj Volume from Sequence !      Actual Inj Volume : 1 µl
Acq. Method    : C:\CHEM32\1\DATA\SSL\ATP 2015-08-04 15-43-10\02-60.M
Last changed   : 8/4/2015 3:43:08 PM by SSL
Analysis Method : C:\CHEM32\1\METHODS\10-30.M
  
```

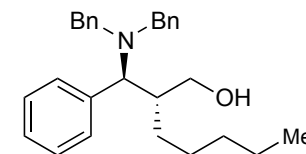

DAD1 A, Sig=230,4 Ref=360,100 (SSLATP 2015-08-04 15-43-10\SSL7-155-ODH.D)

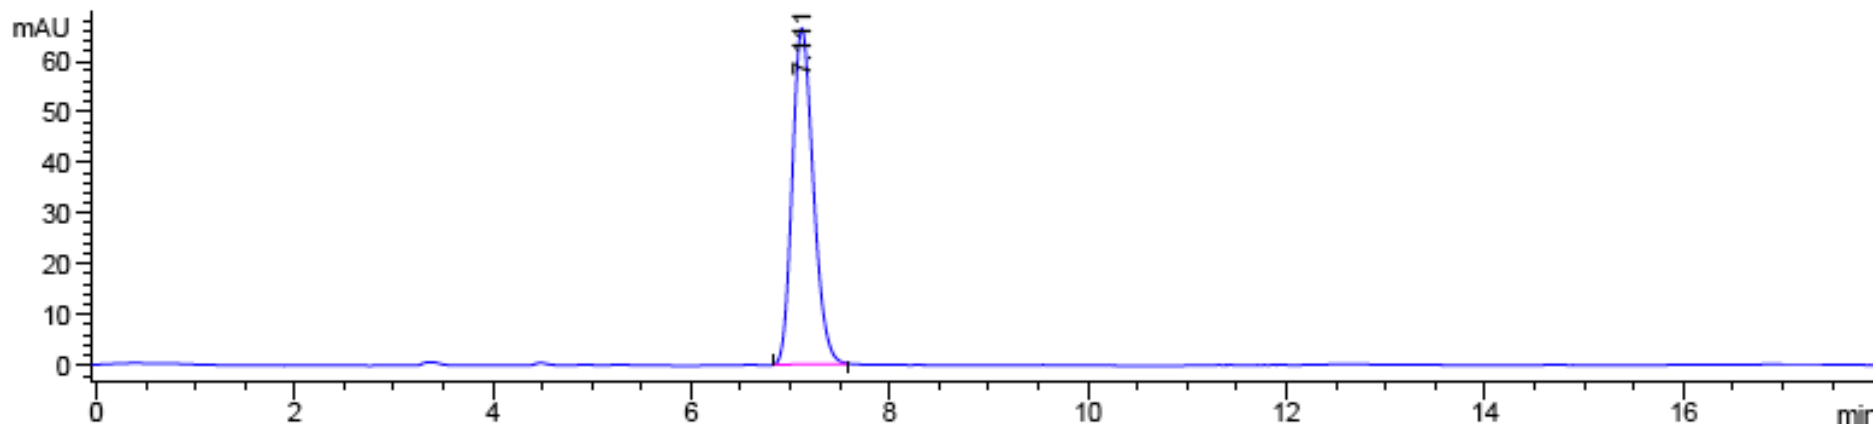

Signal 1: DAD1 A, Sig=230,4 Ref=360,100

| Peak # | RetTime [min] | Type | Width [min] | Area [mAU*s] | Height [mAU] | Area %  |
|--------|---------------|------|-------------|--------------|--------------|---------|
| 1      | 7.111         | BB   | 0.2303      | 979.53082    | 66.31083     | 99.4179 |
| 2      | 12.661        | MM   | 0.4452      | 5.73522      | 2.14708e-1   | 0.5821  |

Totals :                      985.26604      66.52554





Sample Name: SSL7-161

```

=====
Acq. Operator   : SSL                               Seq. Line :    1
Acq. Instrument : Instrument 1                       Location  : Vial 41
Injection Date  : 8/4/2015 10:10:58 PM             Inj       :    1
                                                    Inj Volume: 5 µl
Different Inj Volume from Sequence !      Actual Inj Volume : 0.8 µl
Acq. Method    : C:\CHEM32\1\DATA\SSL\ATP 2015-08-04 22-09-49\02-60.M
Last changed   : 8/4/2015 10:22:48 PM by SSL
                (modified after loading)
Analysis Method : C:\CHEM32\1\METHODS\10-30.M
  
```

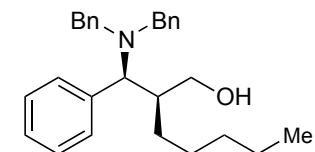

DAD1 D, Sig=220,2 Ref=360,100 (SSLATP 2015-08-04 22-09-49\SSL7-161.D)

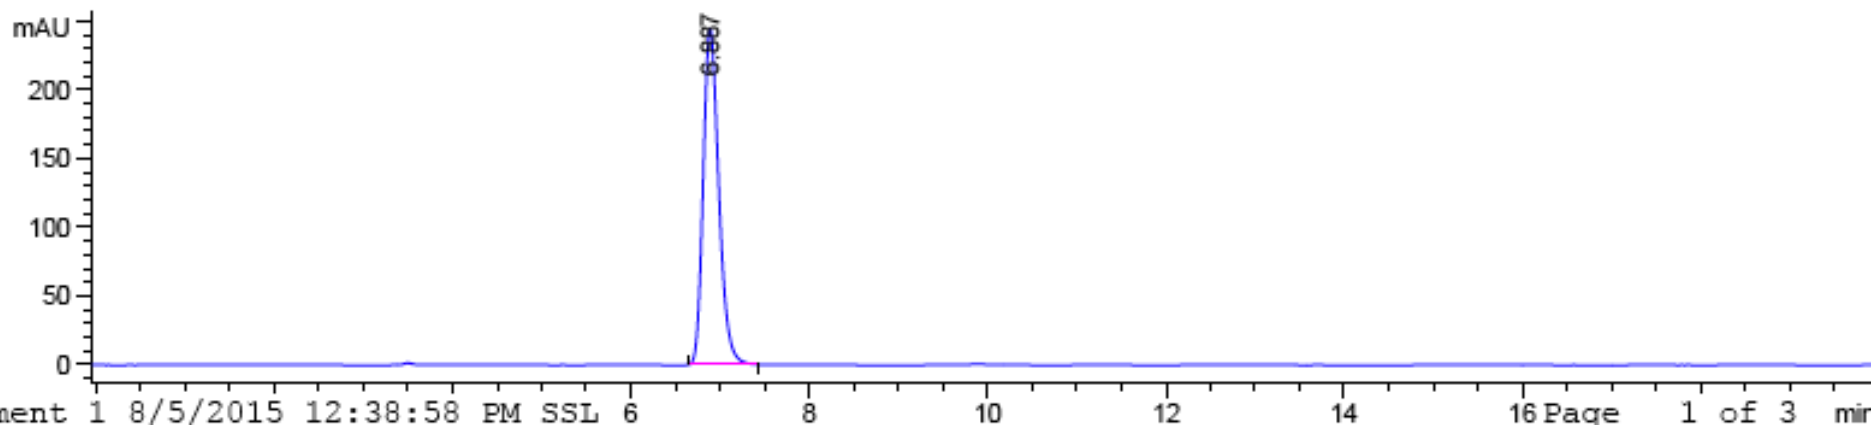

Signal 4: DAD1 D, Sig=220,2 Ref=360,100

| Peak # | RetTime [min] | Type | Width [min] | Area [mAU*s] | Height [mAU] | Area %   |
|--------|---------------|------|-------------|--------------|--------------|----------|
| 1      | 6.887         | BB   | 0.1883      | 2988.11890   | 244.94547    | 100.0000 |

Totals : 2988.11890 244.94547

Sample Name: SSL7-125

```

=====
Acq. Operator   : SSL                               Seq. Line :    1
Acq. Instrument : Instrument 1                     Location  : Vial 21
Injection Date  : 8/10/2015 3:32:45 PM           Inj       :    1
                                                    Inj Volume: 5 µl
Different Inj Volume from Sequence !   Actual Inj Volume : 0.5 µl
Acq. Method    : C:\CHEM32\1\DATA\SSL\ATP 2015-08-10 15-31-32\02-60.M
Last changed   : 8/10/2015 3:50:07 PM by SSL
                (modified after loading)
Analysis Method : C:\CHEM32\1\METHODS\10-30.M
  
```

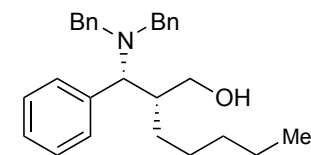

DAD1 D, Sig=220,2 Ref=360,100 (SSLATP 2015-08-10 15-31-32\SSL7-125.D)

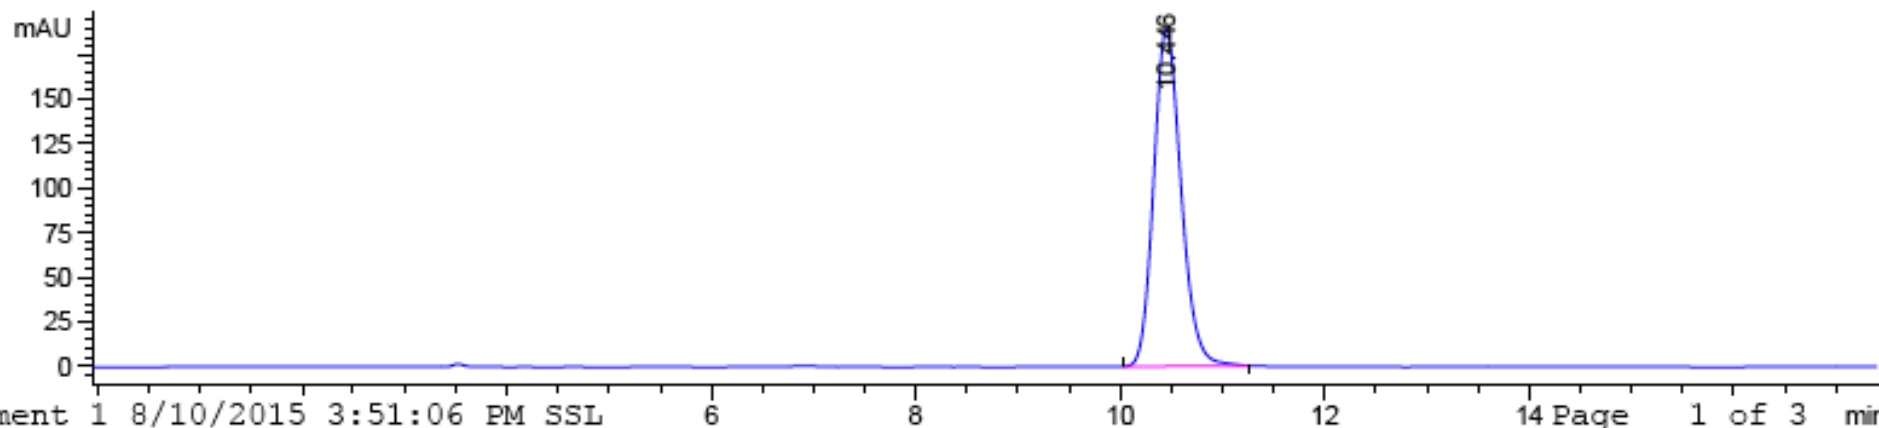

Signal 4: DAD1 D, Sig=220,2 Ref=360,100

| Peak # | RetTime [min] | Type | Width [min] | Area [mAU*s] | Height [mAU] | Area %   |
|--------|---------------|------|-------------|--------------|--------------|----------|
| 1      | 10.446        | BB   | 0.2878      | 3546.18921   | 189.93387    | 100.0000 |

Totals : 3546.18921 189.93387

Sample Name: SSL7-102LP

```

=====
Acq. Operator   : SSL                      Seq. Line :    1
Acq. Instrument : Instrument 1              Location  : Vial 81
Injection Date  : 7/21/2015 8:23:04 AM    Inj       :    1
                                           Inj Volume: 5 µl
Acq. Method     : C:\CHEM32\1\DATA\SSL\NAOYUKI_LC 2015-07-21 08-14-16\01-60.M
Last changed    : 7/21/2015 8:37:06 AM by SSL
                 (modified after loading)
Analysis Method : C:\CHEM32\1\METHODS\10-30.M

```

DAD1 A, Sig=230,4 Ref=360,100 (SSLNAOYUKI\_LC 2015-07-21 08-14-16\SSL7-102LP.D)

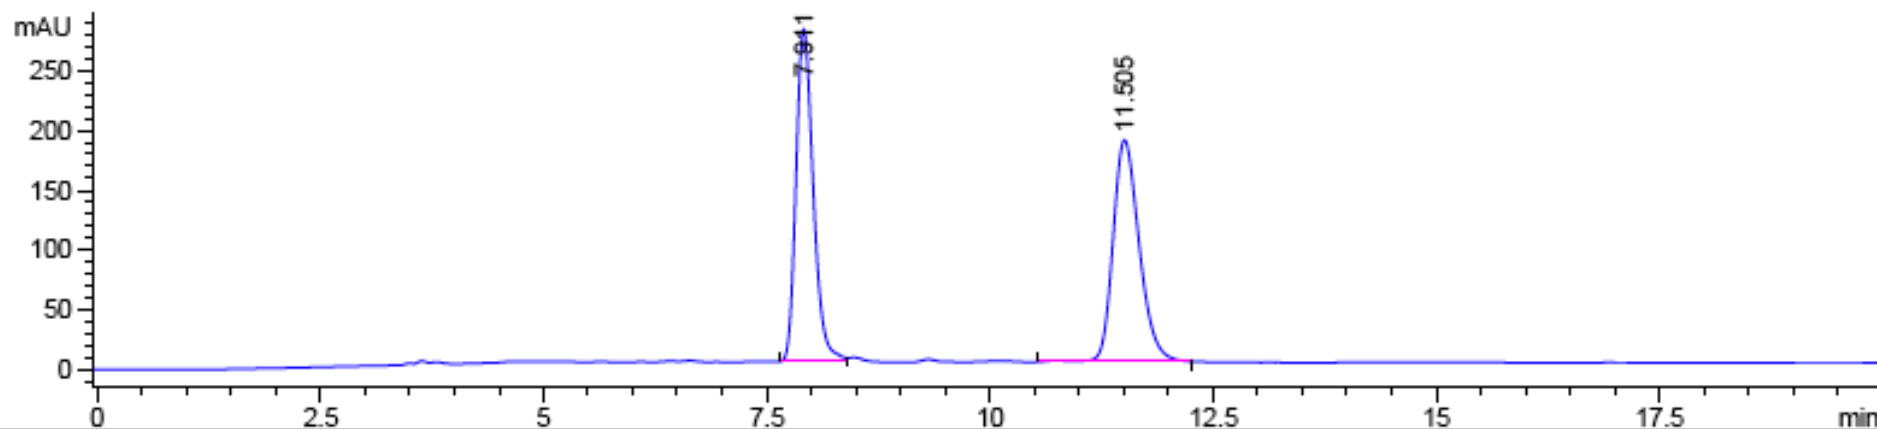

Signal 1: DAD1 A, Sig=230,4 Ref=360,100

| Peak # | RetTime [min] | Type | Width [min] | Area [mAU*s] | Height [mAU] | Area %  |
|--------|---------------|------|-------------|--------------|--------------|---------|
| 1      | 7.911         | BV   | 0.2073      | 3755.11646   | 278.44312    | 49.6299 |
| 2      | 11.505        | BB   | 0.3174      | 3811.12036   | 185.71999    | 50.3701 |

Totals : 7566.23682 464.16310

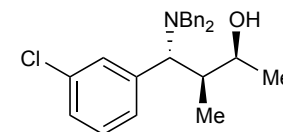

Racemic

Sample Name: SSL7-127

```

=====
Acq. Operator   : SSL                      Seq. Line :    2
Acq. Instrument : Instrument 1              Location  : Vial 51
Injection Date  : 7/27/2015 10:50:08 PM   Inj       :    1
                                           Inj Volume: 5 µl
Different Inj Volume from Sequence !      Actual Inj Volume : 0.4 µl
Acq. Method    : C:\CHEM32\1\DATA\SSL\NAOYUKI_LC 2015-07-27 22-26-58\01-30.M
Last changed   : 7/27/2015 10:26:56 PM by SSL
Analysis Method : C:\CHEM32\1\METHODS\10-30.M

```

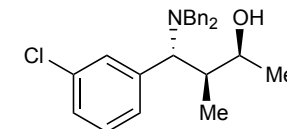

DAD1 A, Sig=230,4 Ref=360,100 (SSL\NAOYUKI\_LC 2015-07-27 22-26-58\SSL7-127.D)

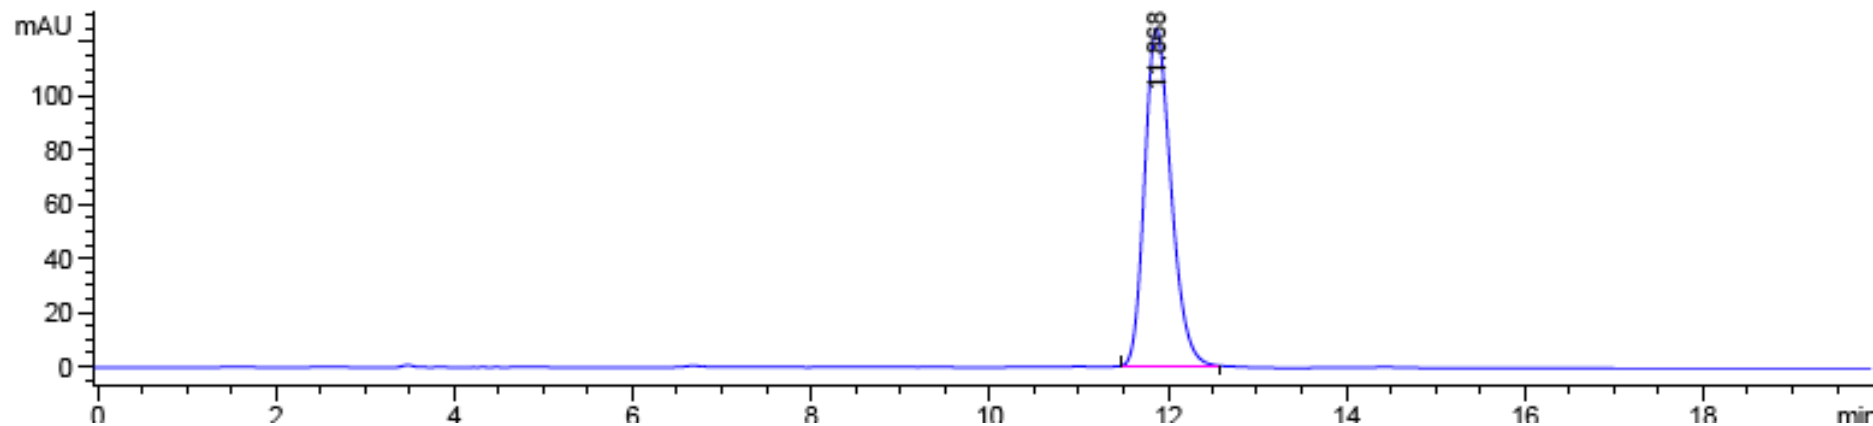

Signal 1: DAD1 A, Sig=230,4 Ref=360,100

| Peak # | RetTime [min] | Type | Width [min] | Area [mAU*s] | Height [mAU] | Area %   |
|--------|---------------|------|-------------|--------------|--------------|----------|
| 1      | 11.868        | BB   | 0.3189      | 2577.07617   | 124.80714    | 100.0000 |

Totals :                    2577.07617    124.80714

Sample Name: SSL7-103LP

```

=====
Acq. Operator   : SSL                               Seq. Line :    2
Acq. Instrument : Instrument 1                       Location  : Vial 81
Injection Date  : 7/21/2015 8:44:18 AM             Inj       :    1
                                                    Inj Volume: 5 µl
Acq. Method     : C:\CHEM32\1\DATA\SSL\NAOYUKI_LC 2015-07-21 08-14-16\01-60.M
Last changed    : 7/21/2015 8:37:06 AM by SSL
                  (modified after loading)
Analysis Method : C:\CHEM32\1\METHODS\10-30.M
  
```

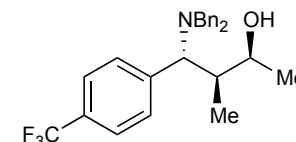

Racemic

DAD1 B, Sig=254,8 Ref=360,100 (SSL\NAOYUKI\_LC 2015-07-21 08-14-16\SSL7-103LP.D)

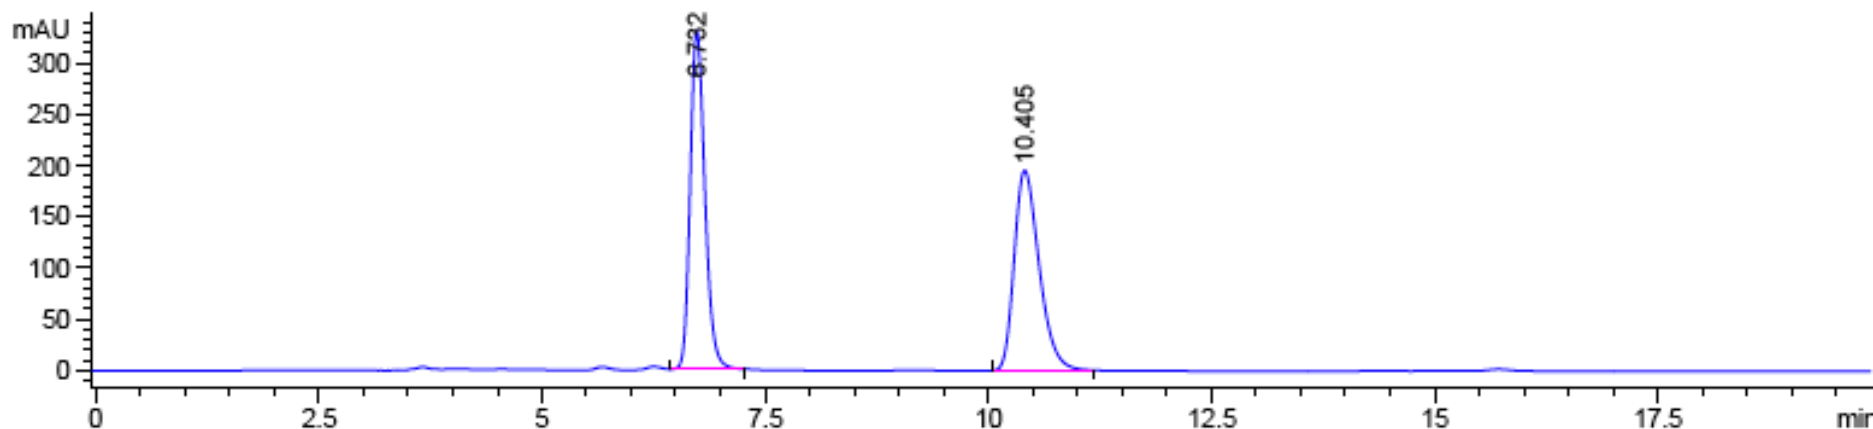

Signal 2: DAD1 B, Sig=254,8 Ref=360,100

| Peak # | RetTime [min] | Type | Width [min] | Area [mAU*s] | Height [mAU] | Area %  |
|--------|---------------|------|-------------|--------------|--------------|---------|
| 1      | 6.732         | VB   | 0.1764      | 3822.89648   | 331.84814    | 50.0367 |
| 2      | 10.405        | BB   | 0.3015      | 3817.28784   | 195.78465    | 49.9633 |

Sample Name: SSL7-128

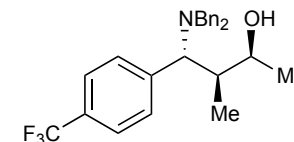

```

=====
Acq. Operator   : SSL                      Seq. Line :    2
Acq. Instrument : Instrument 1              Location  : Vial 51
Injection Date  : 7/22/2015 3:51:20 PM    Inj       :    1
                                           Inj Volume: 5 µl
Different Inj Volume from Sequence !      Actual Inj Volume : 8 µl
Acq. Method     : C:\CHEM32\1\DATA\SSL\NAOYUKI_LC 2015-07-22 15-28-05\01-30.M
Last changed    : 7/22/2015 3:28:03 PM by SSL
Analysis Method : C:\CHEM32\1\METHODS\10-30.M
  
```

DAD1 B, Sig=254,8 Ref=360,100 (SSL\NAOYUKI\_LC 2015-07-22 15-28-05\SSL7-128.D)

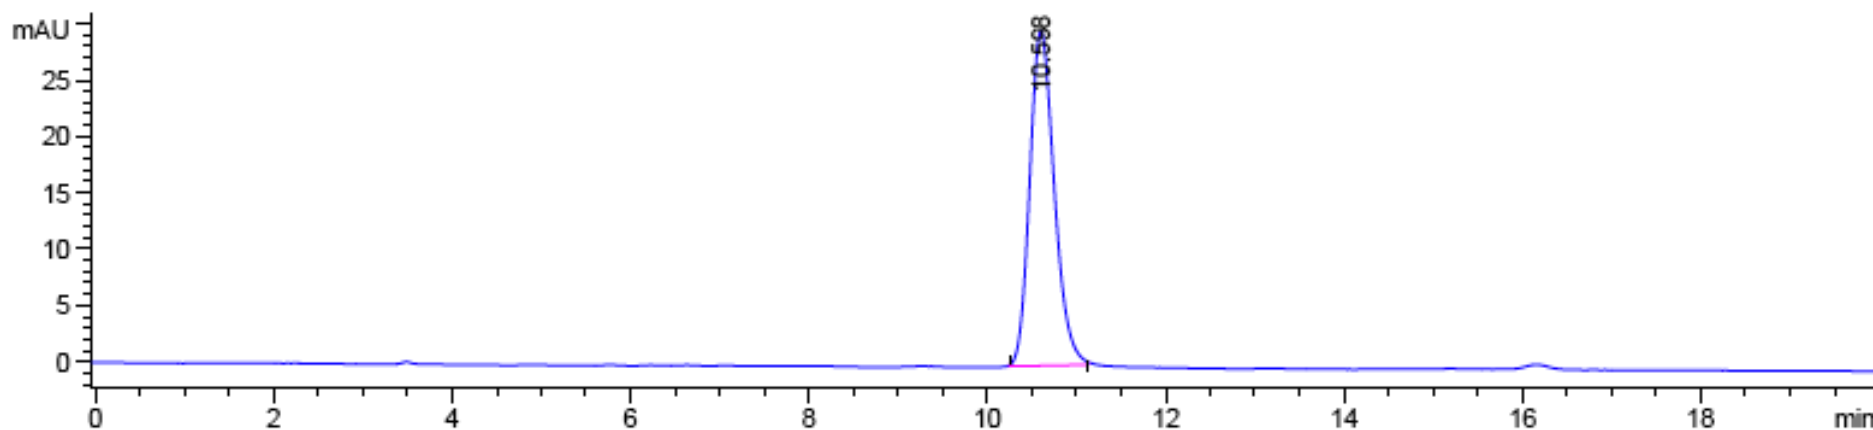

Signal 2: DAD1 B, Sig=254,8 Ref=360,100

| Peak # | RetTime [min] | Type | Width [min] | Area [mAU*s] | Height [mAU] | Area %   |
|--------|---------------|------|-------------|--------------|--------------|----------|
| 1      | 10.598        | BB   | 0.2955      | 569.41296    | 29.72390     | 100.0000 |

Totals :                      569.41296    29.72390

Sample Name: SSL7-105LP

```

=====
Acq. Operator   : SSL                      Seq. Line :    3
Acq. Instrument : Instrument 1              Location  : Vial 81
Injection Date  : 7/21/2015 9:05:30 AM    Inj       :    1
                                           Inj Volume: 5 µl
Different Inj Volume from Sequence !      Actual Inj Volume : 3 µl
Acq. Method    : C:\CHEM32\1\DATA\SSL\NAOYUKI_LC 2015-07-21 08-14-16\01-60.M
Last changed   : 7/21/2015 9:18:47 AM by SSL

```

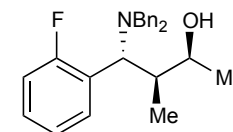

Racemic

DAD1 D, Sig=220,4 Ref=360,100 (SSLNAOYUKI\_LC 2015-07-21 08-14-16\SSL7-105LP.D)

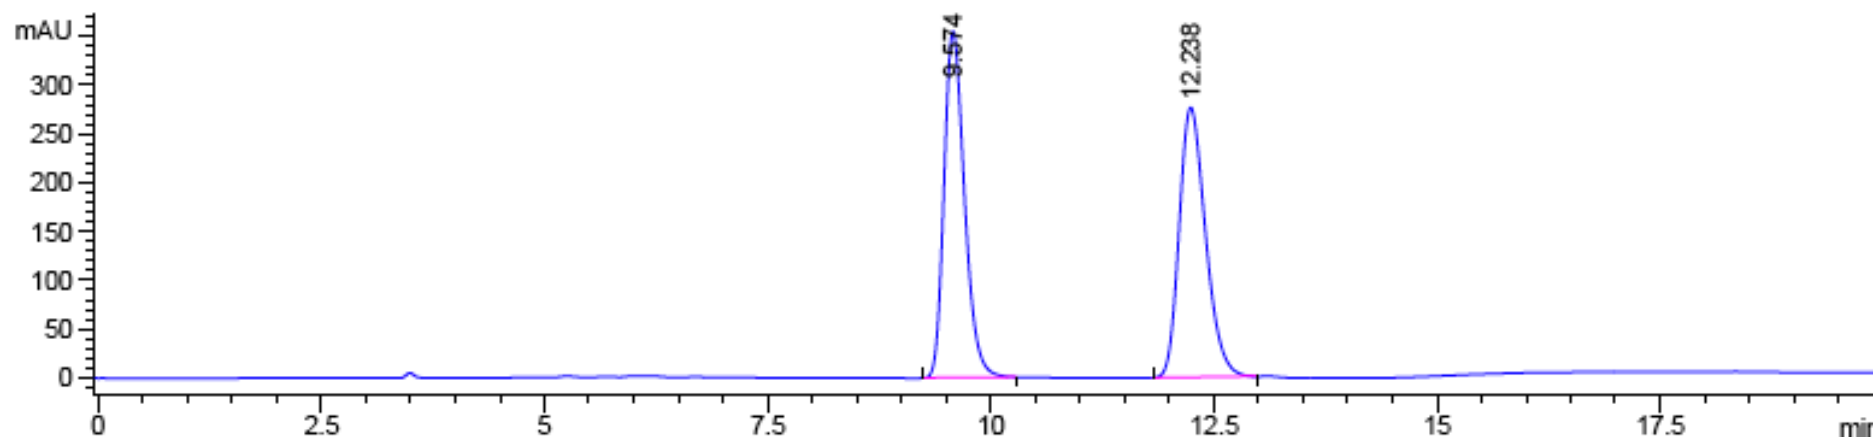

Signal 4: DAD1 D, Sig=220,4 Ref=360,100

| Peak # | RetTime [min] | Type | Width [min] | Area [mAU*s] | Height [mAU] | Area %  |
|--------|---------------|------|-------------|--------------|--------------|---------|
| 1      | 9.574         | BB   | 0.2463      | 5678.22266   | 355.53235    | 50.0013 |
| 2      | 12.238        | BB   | 0.3153      | 5677.92529   | 276.78180    | 49.9987 |

Totals : 1.13561e4 632.31415

S187

Sample Name: SSL7-112

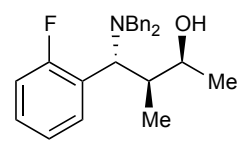

```

=====
Acq. Operator   : SSL                               Seq. Line :    1
Acq. Instrument : Instrument 1                       Location  : Vial 51
Injection Date  : 7/27/2015 5:00:59 PM             Inj       :    1
                                                    Inj Volume: 5 µl
Different Inj Volume from Sequence !      Actual Inj Volume : 3 µl
Acq. Method     : C:\CHEM32\1\DATA\SSL\NAOYUKI_LC 2015-07-27 16-58-48\01-30.M
Last changed    : 7/27/2015 5:00:00 PM by SSL
    
```

DAD1 D, Sig=220,2 Ref=360,100 (SSL\NAOYUKI\_LC 2015-07-27 16-58-48\SSL7-112.D)

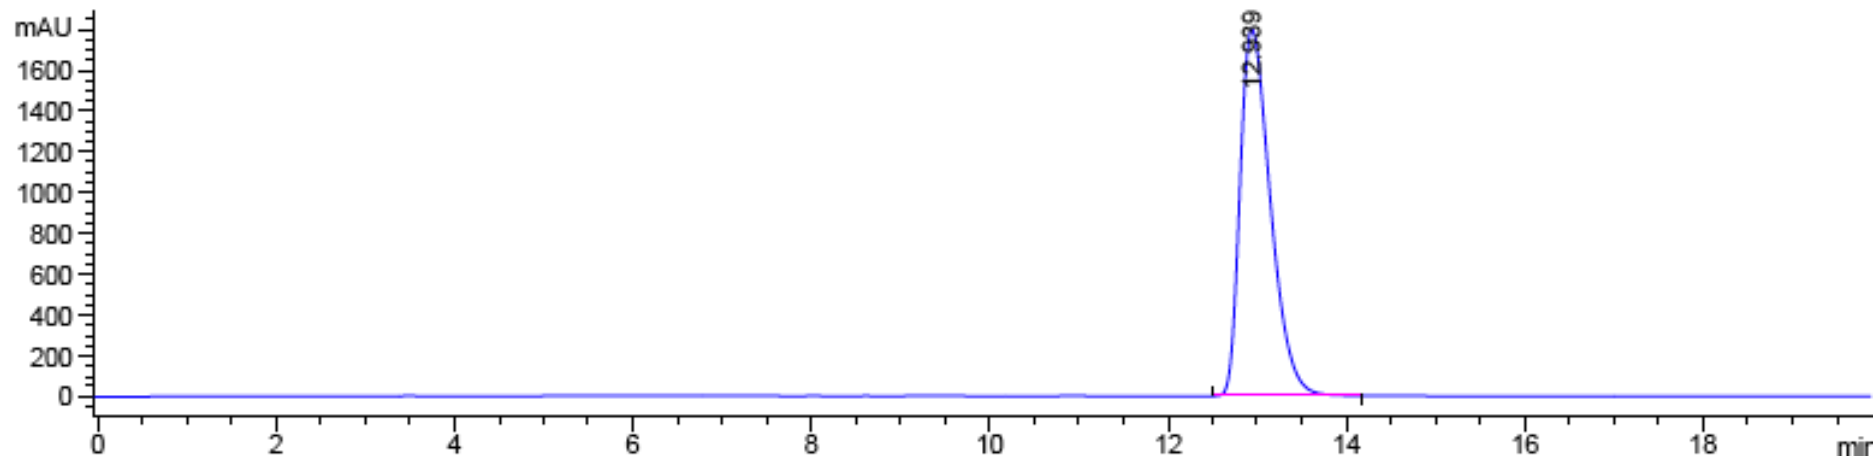

Signal 4: DAD1 D, Sig=220,2 Ref=360,100

| Peak # | RetTime [min] | Type | Width [min] | Area [mAU*s] | Height [mAU] | Area %   |
|--------|---------------|------|-------------|--------------|--------------|----------|
| 1      | 12.939        | BB   | 0.3687      | 4.25919e4    | 1796.04590   | 100.0000 |

Totals : 4.25919e4 1796.04590



Sample Name: SSL7-106LP

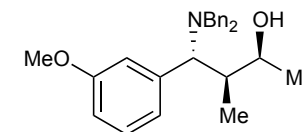

Racemic

```

=====
Acq. Operator   : SSL                      Seq. Line :    4
Acq. Instrument : Instrument 1              Location  : Vial 81
Injection Date  : 7/21/2015 9:26:40 AM    Inj       :    1
                                           Inj Volume: 5 µl
Different Inj Volume from Sequence !      Actual Inj Volume : 3 µl
Acq. Method    : C:\CHEM32\1\DATA\SSL\NAOYUKI_LC 2015-07-21 08-14-16\01-60.M
Last changed   : 7/21/2015 9:57:16 AM by SSL
  
```

DAD1 D, Sig=220,4 Ref=360,100 (SSL\NAOYUKI\_LC 2015-07-21 08-14-16\SSL7-106LP.D)

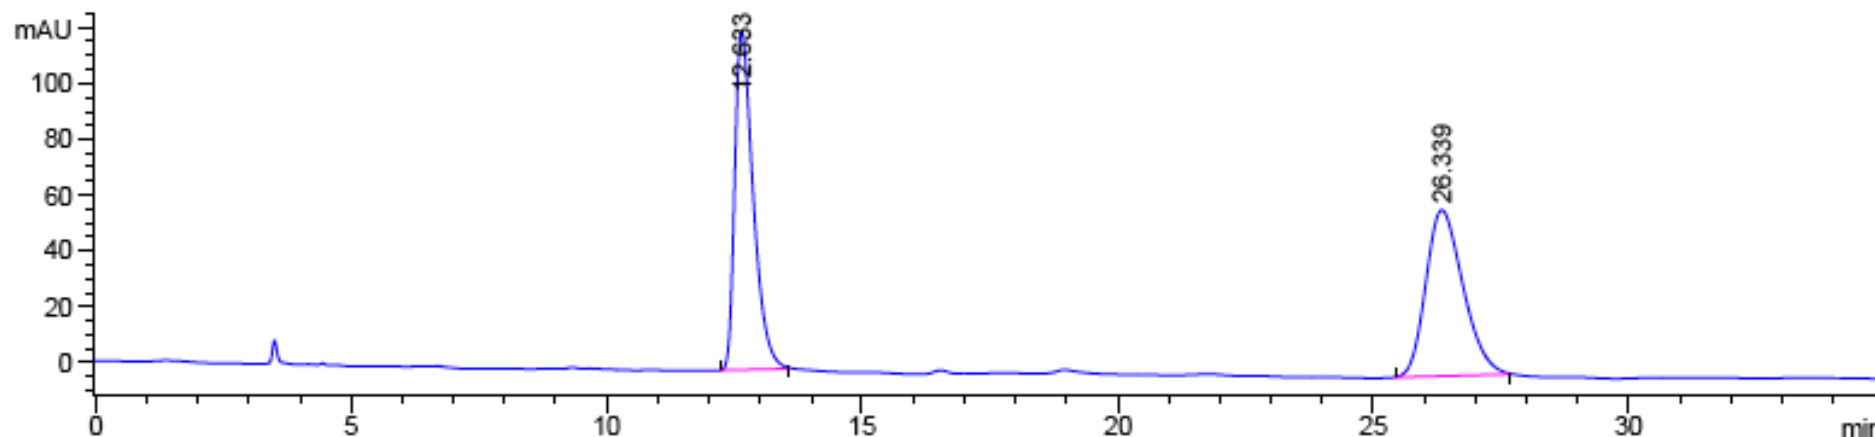

Signal 4: DAD1 D, Sig=220,4 Ref=360,100

| Peak # | RetTime [min] | Type | Width [min] | Area [mAU*s] | Height [mAU] | Area %  |
|--------|---------------|------|-------------|--------------|--------------|---------|
| 1      | 12.633        | BB   | 0.3810      | 3048.82324   | 121.40752    | 50.1134 |
| 2      | 26.339        | BB   | 0.7782      | 3035.02637   | 59.59371     | 49.8866 |

Totals : 6083.84961 181.00123

S189

Sample Name: SSL7-129

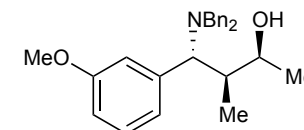

```

=====
Acq. Operator   : SSL                      Seq. Line :    5
Acq. Instrument : Instrument 1              Location  : Vial 81
Injection Date  : 7/21/2015 10:02:52 AM   Inj       :    1
                                           Inj Volume: 5 µl
Different Inj Volume from Sequence !      Actual Inj Volume : 4 µl
Acq. Method     : C:\CHEM32\1\DATA\SSL\NAOYUKI_LC 2015-07-21 08-14-16\01-60.M
Last changed    : 7/21/2015 9:57:16 AM by SSL
  
```

DAD1 D, Sig=220,4 Ref=360,100 (SSLNAOYUKI\_LC 2015-07-21 08-14-16\SSL7-129.D)

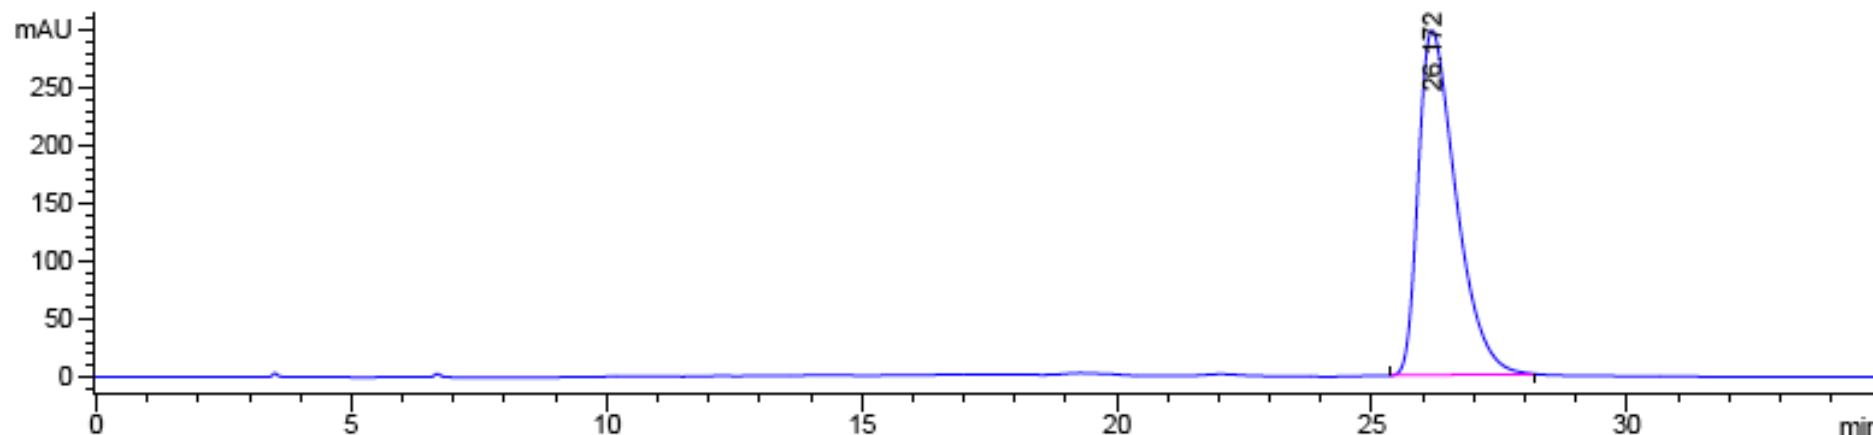

Signal 4: DAD1 D, Sig=220,4 Ref=360,100

| Peak # | RetTime [min] | Type | Width [min] | Area [mAU*s] | Height [mAU] | Area %   |
|--------|---------------|------|-------------|--------------|--------------|----------|
| 1      | 26.172        | BB   | 0.7864      | 1.54151e4    | 298.52603    | 100.0000 |

Totals :                      1.54151e4    298.52603

Sample Name: SSL7-67BF-1

```

=====
Acq. Operator   : SSL                      Seq. Line :    1
Acq. Instrument : Instrument 1              Location  : Vial 61
Injection Date  : 7/9/2015 2:45:14 PM     Inj       :    1
                                           Inj Volume: 5 µl
Different Inj Volume from Sequence !      Actual Inj Volume : 3 µl
Acq. Method    : C:\CHEM32\1\DATA\SSL\HPLC 2015-07-09 14-43-50\01-60.M
Last changed   : 7/9/2015 3:16:32 PM by SSL

```

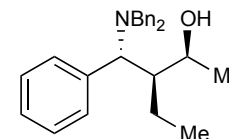

Racemic

DAD1 D, Sig=220,4 Ref=360,100 (SSL\HPLC 2015-07-09 14-43-50\SSL7-67BF-1.D)

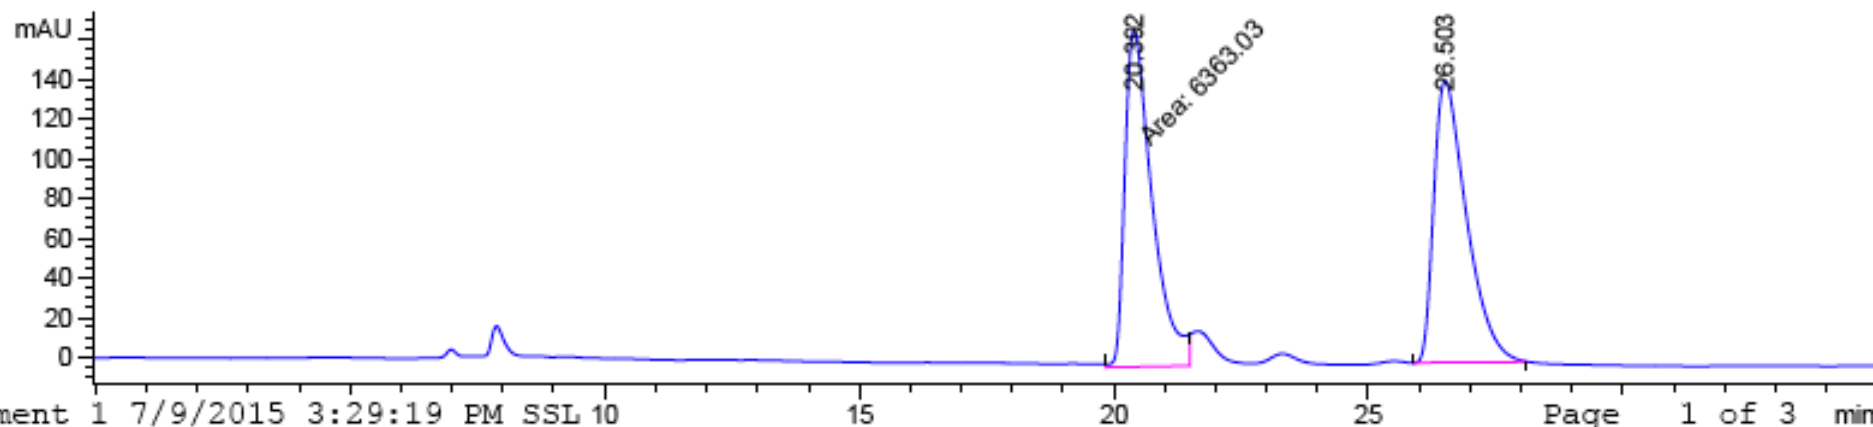

Signal 4: DAD1 D, Sig=220,4 Ref=360,100

| Peak # | RetTime [min] | Type | Width [min] | Area [mAU*s] | Height [mAU] | Area %  |
|--------|---------------|------|-------------|--------------|--------------|---------|
| 1      | 20.392        | MF   | 0.6244      | 6363.02832   | 169.83548    | 50.0014 |
| 2      | 26.503        | BB   | 0.6709      | 6362.67236   | 141.96152    | 49.9986 |

Sample Name: ZLW-2-34

```

=====
Acq. Operator   : ZLW                      Seq. Line :    2
Acq. Instrument : Instrument 1              Location  : Vial 32
Injection Date  : 9/4/2015 7:57:54 PM     Inj       :    1
                                           Inj Volume: 5 µl
Different Inj Volume from Sequence !      Actual Inj Volume : 1 µl
Acq. Method    : C:\CHEM32\1\DATA\ZLW\1\ATP 2015-09-04 19-10-21\30-60.M
Last changed   : 9/4/2015 7:57:37 PM by ZLW

```

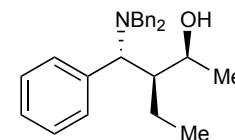

DAD1 D, Sig=220,2 Ref=360,100 (ZLW\ATP 2015-09-04 19-10-21\ZLW-2-34.D)

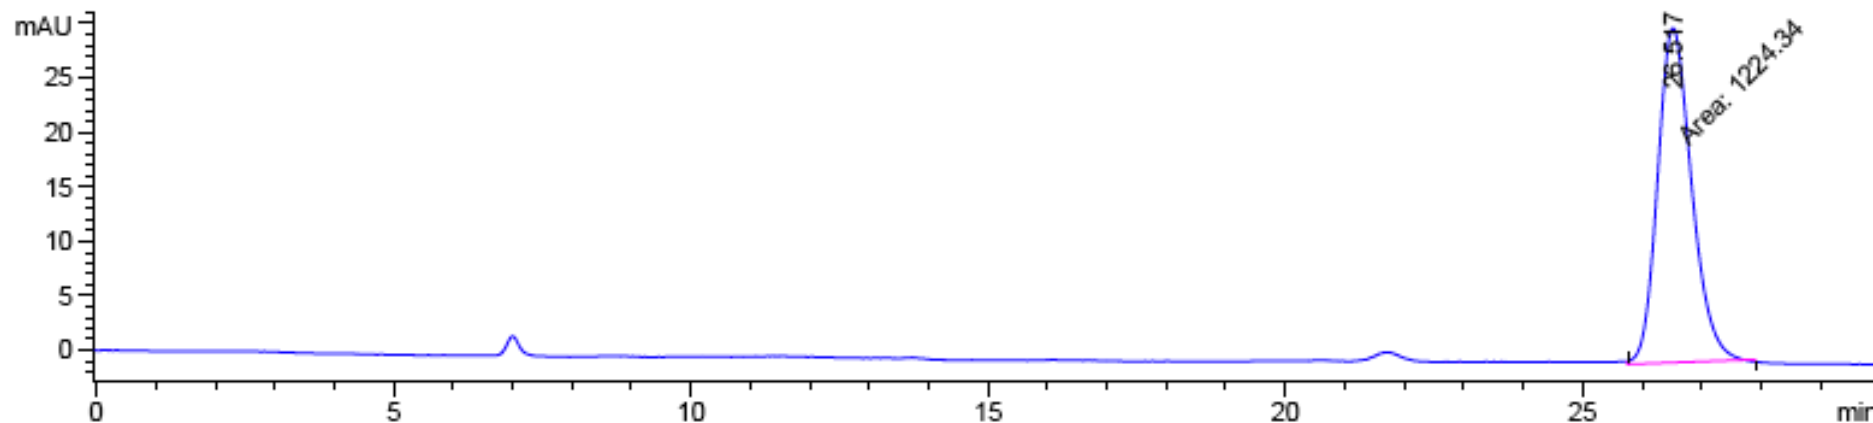

Signal 4: DAD1 D, Sig=220,2 Ref=360,100

| Peak # | RetTime [min] | Type | Width [min] | Area [mAU*s] | Height [mAU] | Area %   |
|--------|---------------|------|-------------|--------------|--------------|----------|
| 1      | 26.517        | MM   | 0.6646      | 1224.33569   | 30.70510     | 100.0000 |

Totals :                    1224.33569    30.70510

Sample Name: SSL7-50

```

=====
Acq. Operator   : SSL                               Seq. Line :    1
Acq. Instrument : Instrument 1                       Location  : Vial 52
Injection Date  : 7/29/2015 10:21:12 PM            Inj       :    1
                                                    Inj Volume: 5 µl
Different Inj Volume from Sequence !   Actual Inj Volume : 2 µl
Acq. Method    : C:\CHEM32\1\DATA\SSL\ATP 2015-07-29 22-19-28\20-30.M
Last changed   : 7/29/2015 10:19:46 PM by SSL
  
```

DAD1 D, Sig=220,2 Ref=360,100 (SSLATP 2015-07-29 22-19-28\SSL7-50-IA.D)

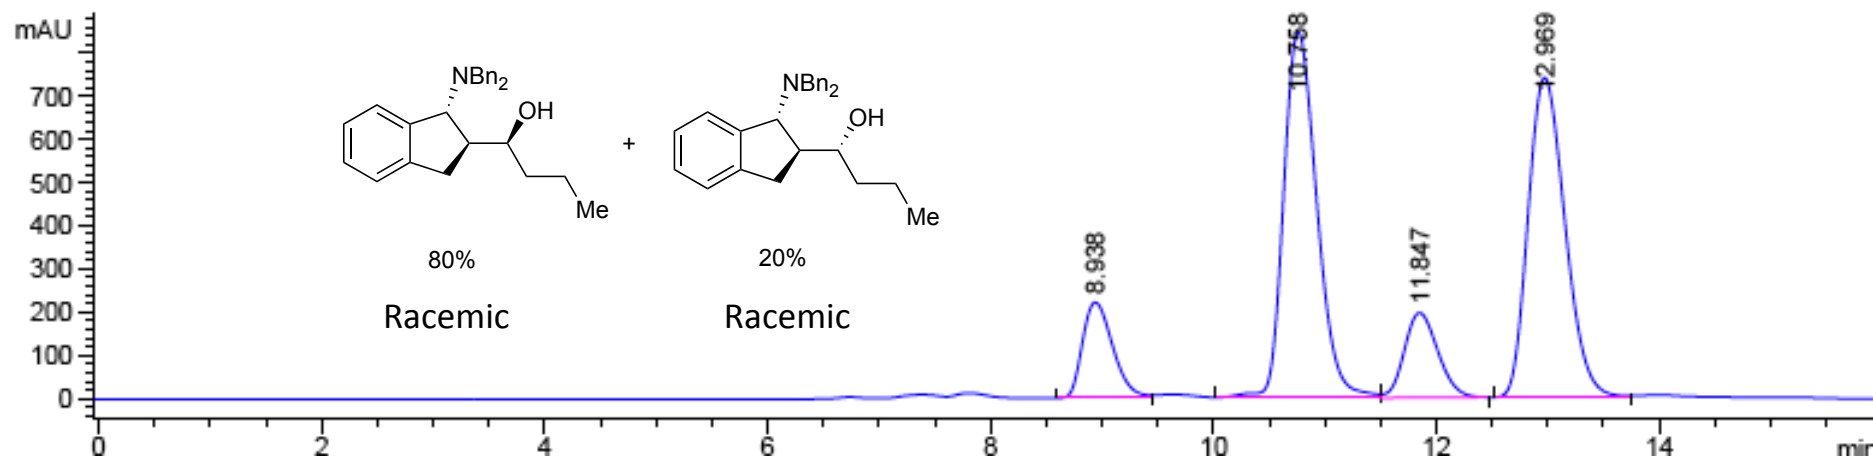

Signal 4: DAD1 D, Sig=220,2 Ref=360,100

| Peak # | RetTime [min] | Type | Width [min] | Area [mAU*s] | Height [mAU] | Area %  |
|--------|---------------|------|-------------|--------------|--------------|---------|
| 1      | 8.938         | BV   | 0.2986      | 4184.66992   | 221.32018    | 9.7328  |
| 2      | 10.758        | VV   | 0.3258      | 1.75565e4    | 847.08801    | 40.8333 |
| 3      | 11.847        | VB   | 0.3297      | 4147.60791   | 196.95012    | 9.6466  |
| 4      | 12.969        | BB   | 0.3634      | 1.71068e4    | 740.92169    | 39.7873 |

Sample Name: SSL7-153-COMB

```

=====
Acq. Operator   : SSL                               Seq. Line :    1
Acq. Instrument : Instrument 1                     Location  : Vial 51
Injection Date  : 7/30/2015 5:26:10 PM           Inj       :    1
                                                    Inj Volume: 5 µl
Different Inj Volume from Sequence !   Actual Inj Volume : 0.5 µl
Acq. Method    : C:\CHEM32\1\DATA\SSL\ATP 2015-07-30 17-24-26\20-30.M
Last changed   : 7/30/2015 2:39:50 PM by SSL
  
```

DAD1 D, Sig=220,2 Ref=360,100 (SSLATP 2015-07-30 17-24-26\SSL7-153-COMB.D)

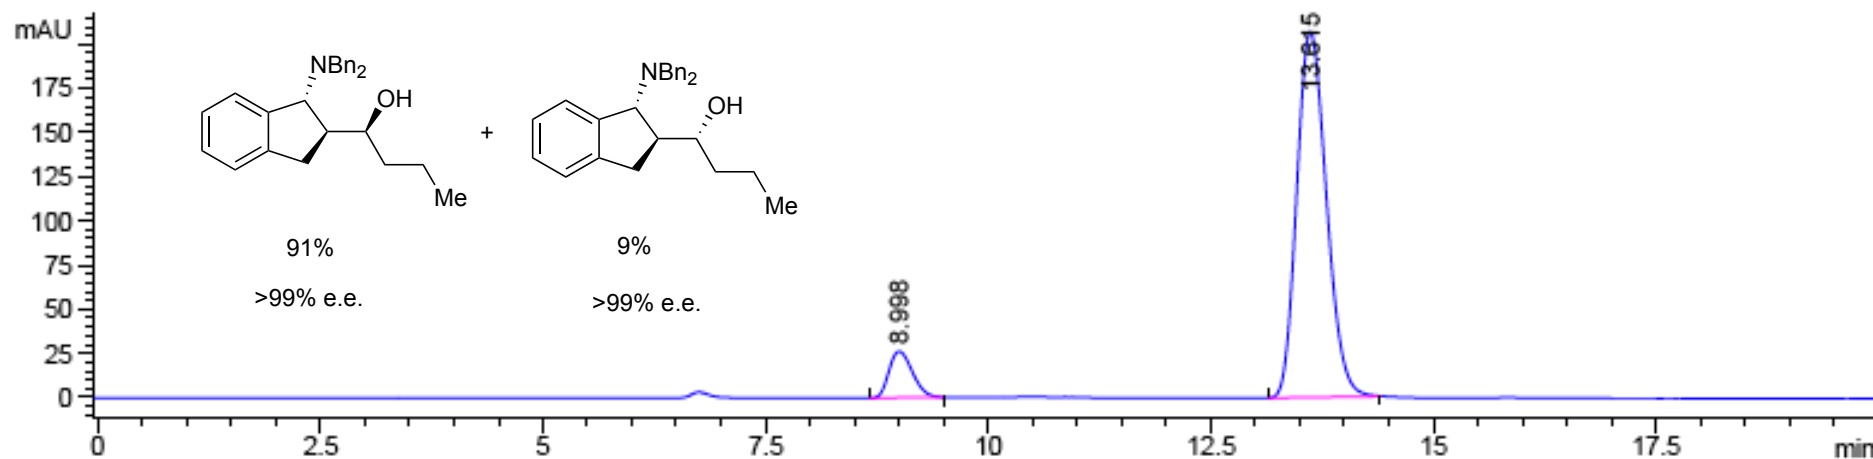

Signal 4: DAD1 D, Sig=220,2 Ref=360,100

| Peak # | RetTime [min] | Type | Width [min] | Area [mAU*s] | Height [mAU] | Area %  |
|--------|---------------|------|-------------|--------------|--------------|---------|
| 1      | 8.998         | BB   | 0.2908      | 484.66379    | 26.33016     | 9.1808  |
| 2      | 13.615        | BB   | 0.3641      | 4794.41309   | 207.07204    | 90.8192 |

Totals : 5279.07687 233.40219



Sample Name: SSL7-237B-MP

```

=====
Acq. Operator   : SSL                               Seq. Line :    1
Acq. Instrument : Instrument 1                       Location  : Vial 51
Injection Date  : 10/6/2015 7:43:10 PM             Inj       :    1
                                                    Inj Volume: 5 µl
Different Inj Volume from Sequence !      Actual Inj Volume : 0.4 µl
Acq. Method     : C:\CHEM32\1\DATA\SSL\ATP 2015-10-06 19-41-51\01-30.M
Last changed    : 10/6/2015 8:19:12 PM by SSL
  
```

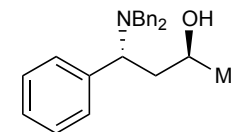

DAD1 D, Sig=220,2 Ref=360,100 (SSLATP 2015-10-06 19-41-51\SSL7-237B-MP.D)

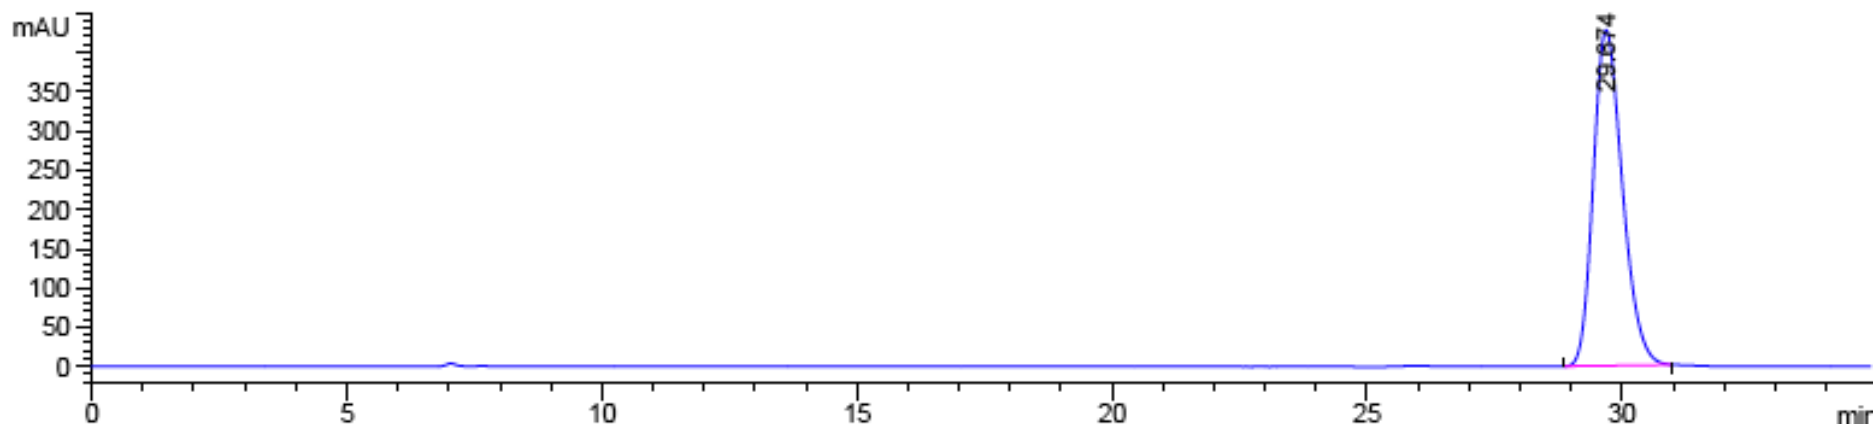

Signal 4: DAD1 D, Sig=220,2 Ref=360,100

| Peak # | RetTime [min] | Type | Width [min] | Area [mAU*s] | Height [mAU] | Area %   |
|--------|---------------|------|-------------|--------------|--------------|----------|
| 1      | 29.674        | BB   | 0.6129      | 1.69683e4    | 427.70111    | 100.0000 |

Totals :                      1.69683e4    427.70111



Sample Name: SSL7-237B-LP

```

=====
Acq. Operator   : SSL                      Seq. Line :    2
Acq. Instrument : Instrument 1              Location  : Vial 52
Injection Date  : 10/6/2015 8:20:40 PM    Inj       :    1
                                           Inj Volume: 5 µl
Different Inj Volume from Sequence !      Actual Inj Volume : 2 µl
Acq. Method    : C:\CHEM32\1\DATA\SSL\ATP 2015-10-06 19-41-51\01-30.M
Last changed   : 10/6/2015 8:19:12 PM by SSL
  
```

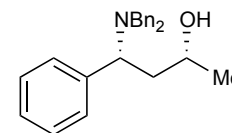

DAD1 D, Sig=220,2 Ref=360,100 (SSLATP 2015-10-06 19-41-51\SSL7-237B-LP.D)

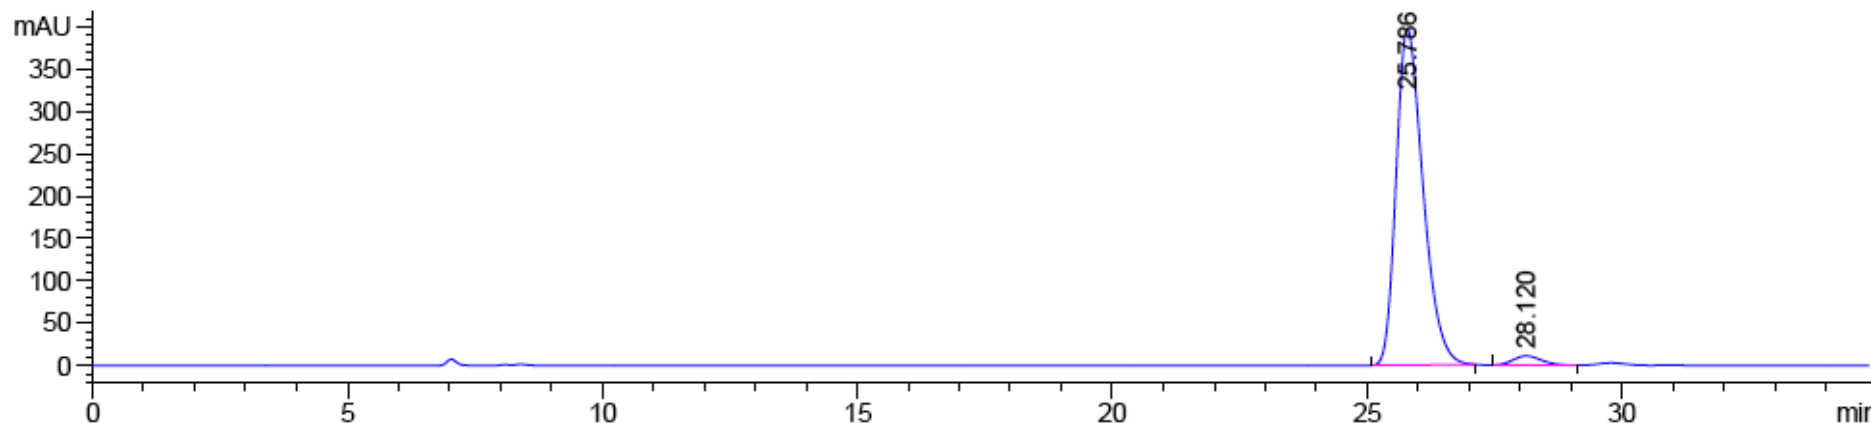

Signal 4: DAD1 D, Sig=220,2 Ref=360,100

| Peak # | RetTime [min] | Type | Width [min] | Area [mAU*s] | Height [mAU] | Area %  |
|--------|---------------|------|-------------|--------------|--------------|---------|
| 1      | 25.786        | BB   | 0.5645      | 1.46271e4    | 398.20383    | 97.2233 |
| 2      | 28.120        | BB   | 0.5687      | 417.75027    | 10.81348     | 2.7767  |

Sample Name: SSL4-200LP-MP

```

=====
Acq. Operator   : SSL                               Seq. Line :    1
Acq. Instrument : Instrument 1                       Location  : Vial 51
Injection Date  : 7/30/2015 9:20:30 PM             Inj       :    1
                                                    Inj Volume: 5 µl

Acq. Method     : C:\CHEM32\1\DATA\SSL\ATP 2015-07-30 21-19-25\01-30.M
Last changed    : 7/30/2015 9:19:24 PM by SSL

```

DAD1 D, Sig=220,2 Ref=360,100 (SSLATP 2015-07-30 21-19-25\SSL4-200LP-MP.D)

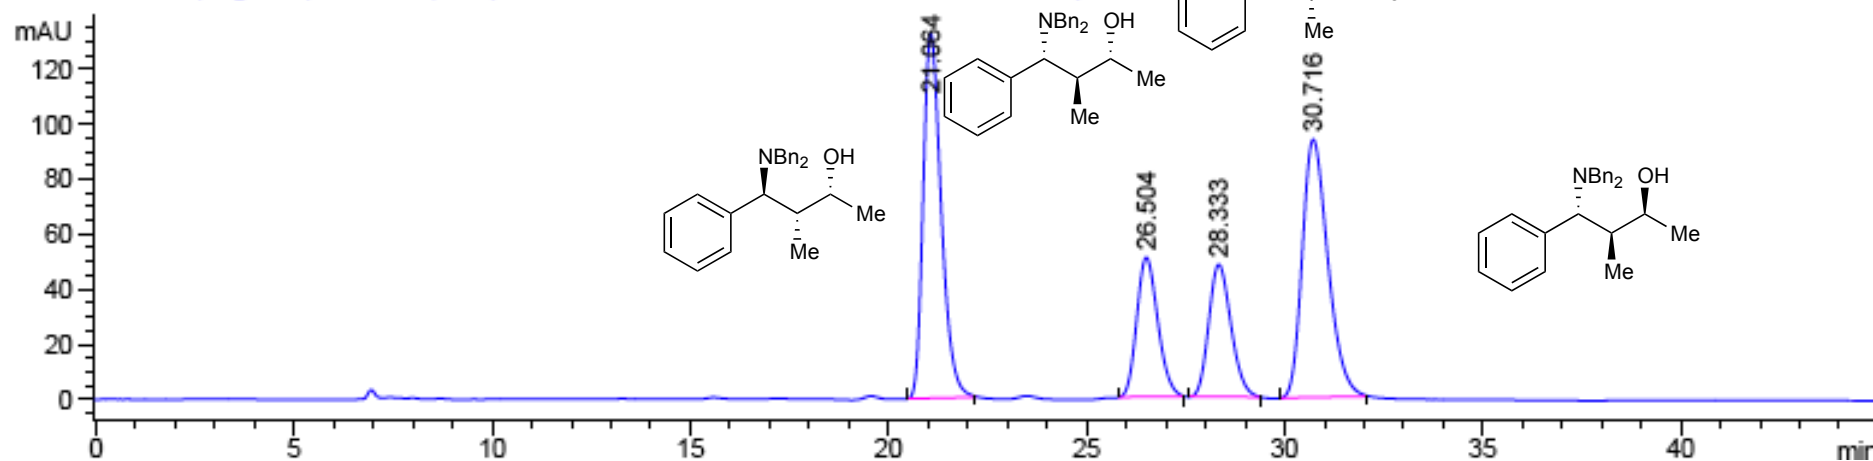

Signal 4: DAD1 D, Sig=220,2 Ref=360,100

| Peak # | RetTime [min] | Type | Width [min] | Area [mAU*s] | Height [mAU] | Area %  |
|--------|---------------|------|-------------|--------------|--------------|---------|
| 1      | 21.064        | BB   | 0.4857      | 4199.19971   | 132.53139    | 34.3770 |
| 2      | 26.504        | BB   | 0.5731      | 1887.18909   | 50.83225     | 15.4496 |
| 3      | 28.333        | BB   | 0.6068      | 1897.07507   | 48.24400     | 15.5305 |
| 4      | 30.716        | BB   | 0.6961      | 4231.69434   | 93.84444     | 34.6430 |

Totals : 1.22152e4 325.45207

Sample Name: SSL7-137

```

=====
Acq. Operator   : SSL                               Seq. Line :    5
Acq. Instrument : Instrument 1                     Location  : Vial 62
Injection Date  : 10/9/2015 3:49:01 PM           Inj       :    1
                                                    Inj Volume: 5 µl
Different Inj Volume from Sequence !      Actual Inj Volume : 0.2 µl
Acq. Method     : C:\CHEM32\1\DATA\SSL\ATP 2015-10-09 14-03-23\01-30.M
  
```

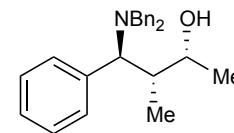

DAD1 D, Sig=220,2 Ref=360,100 (SSLATP 2015-10-09 14-03-23\SSL7-137.D)

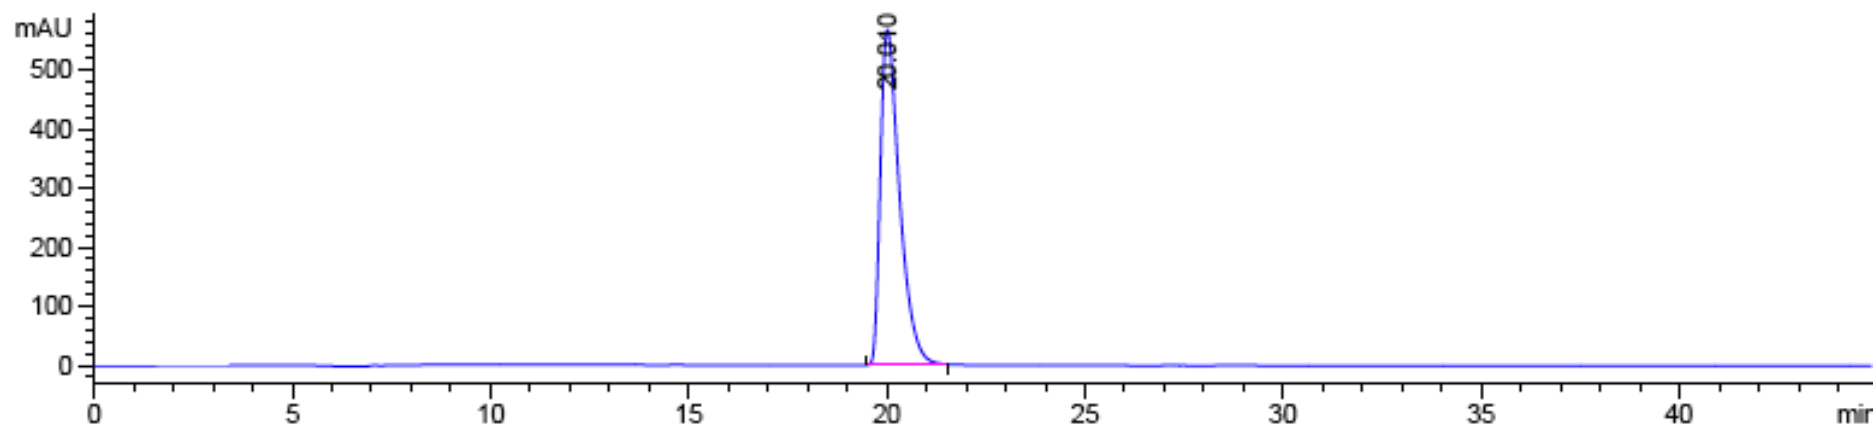

Signal 4: DAD1 D, Sig=220,2 Ref=360,100

| Peak # | RetTime [min] | Type | Width [min] | Area [mAU*s] | Height [mAU] | Area %   |
|--------|---------------|------|-------------|--------------|--------------|----------|
| 1      | 20.010        | BB   | 0.5069      | 1.90614e4    | 566.07062    | 100.0000 |

Totals :                    1.90614e4    566.07062

Sample Name: SSL7-162

```

=====
Acq. Operator   : SSL                      Seq. Line :    1
Acq. Instrument : Instrument 1              Location  : Vial 41
Injection Date  : 8/4/2015 8:10:30 PM      Inj       :    1
                                           Inj Volume: 5 µl
Different Inj Volume from Sequence !      Actual Inj Volume : 1 µl
Acq. Method     : C:\CHEM32\1\DATA\SSL\ATP 2015-08-04 20-09-20\01-30.M
Last changed    : 8/4/2015 8:09:34 PM by SSL

```

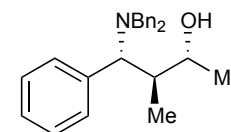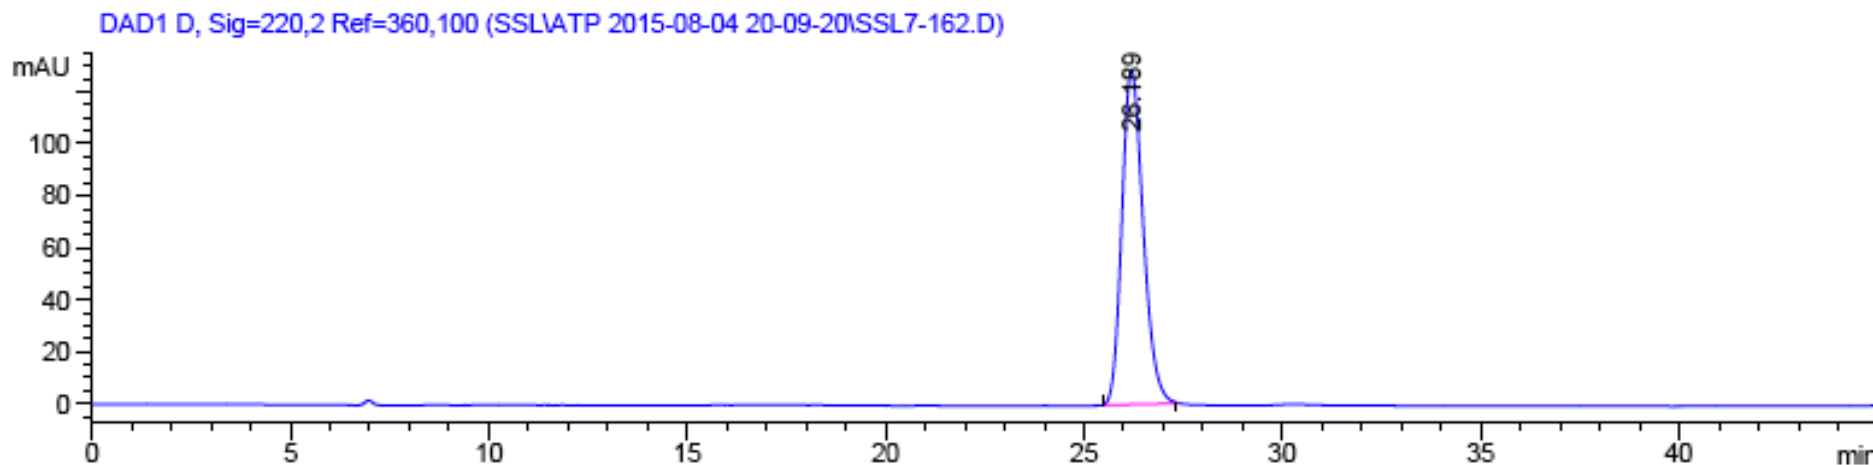

Signal 4: DAD1 D, Sig=220,2 Ref=360,100

| Peak # | RetTime [min] | Type | Width [min] | Area [mAU*s] | Height [mAU] | Area %   |
|--------|---------------|------|-------------|--------------|--------------|----------|
| 1      | 26.189        | BB   | 0.5768      | 4822.30322   | 128.80783    | 100.0000 |

Totals :                      4822.30322    128.80783

Sample Name: SSL7-193

```

=====
Acq. Operator   : ZLW                      Seq. Line :    1
Acq. Instrument : Instrument 1              Location  : Vial 31
Injection Date  : 9/4/2015 7:11:38 PM      Inj       :    1
                                           Inj Volume: 5 µl
Acq. Method     : C:\CHEM32\1\DATA\ZLW\ATP 2015-09-04 19-10-21\30-60.M
Last changed    : 9/4/2015 7:41:38 PM by ZLW
  
```

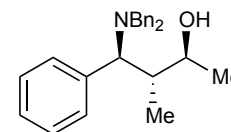

DAD1 D, Sig=220,2 Ref=360,100 (ZLW\ATP 2015-09-04 19-10-21\SSL7-193.D)

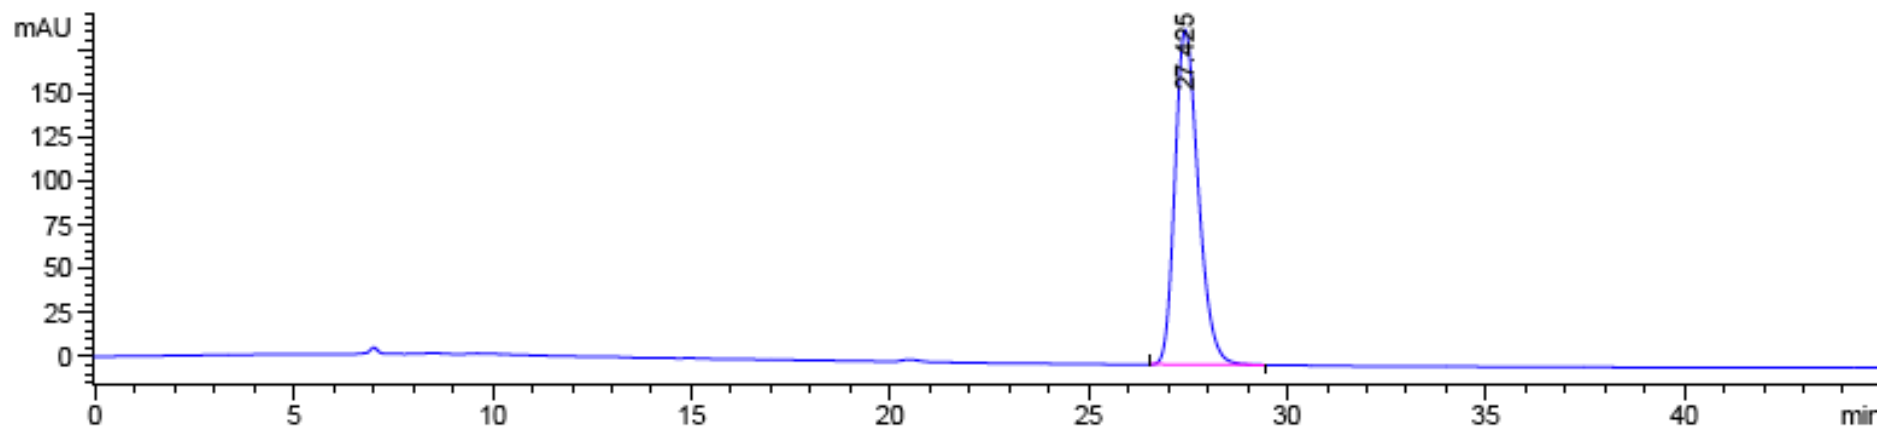

Signal 4: DAD1 D, Sig=220,2 Ref=360,100

| Peak # | RetTime [min] | Type | Width [min] | Area [mAU*s] | Height [mAU] | Area %   |
|--------|---------------|------|-------------|--------------|--------------|----------|
| 1      | 27.425        | BB   | 0.6339      | 7814.40088   | 190.76607    | 100.0000 |

Totals :                      7814.40088    190.76607

Sample Name: SSL7-134

```

=====
Acq. Operator   : SSL                      Seq. Line :    1
Acq. Instrument : Instrument 1              Location  : Vial 61
Injection Date  : 10/9/2015 6:36:36 PM    Inj       :    1
                                           Inj Volume: 5 µl
Different Inj Volume from Sequence !      Actual Inj Volume : 1 µl
Acq. Method    : C:\CHEM32\1\DATA\SSL\ATP 2015-10-09 18-35-13\01-30.M
Last changed   : 10/9/2015 2:03:21 PM by SSL

```

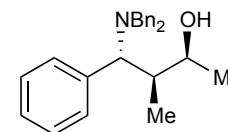

DAD1 D, Sig=220,2 Ref=360,100 (SSLATP 2015-10-09 18-35-13\SSL7-134.D)

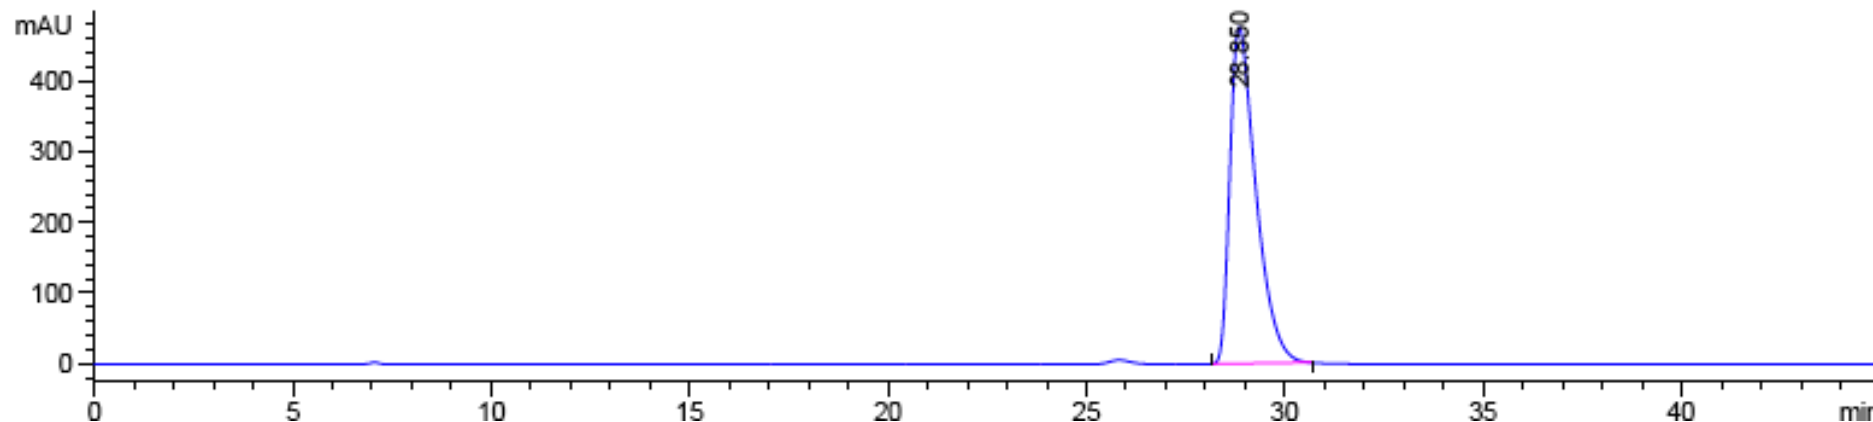

Signal 4: DAD1 D, Sig=220,2 Ref=360,100

| Peak # | RetTime [min] | Type | Width [min] | Area [mAU*s] | Height [mAU] | Area %   |
|--------|---------------|------|-------------|--------------|--------------|----------|
| 1      | 28.850        | BB   | 0.6899      | 2.17376e4    | 474.96344    | 100.0000 |

Totals :                    2.17376e4    474.96344

Sample Name: SSL7-223-LP-MP

```

=====
Acq. Operator   : SSL                      Seq. Line :    1
Acq. Instrument : Instrument 1              Location  : Vial 44
Injection Date  : 9/25/2015 8:00:48 PM    Inj       :    1
                                           Inj Volume: 5 µl
Acq. Method    : C:\CHEM32\1\DATA\SSL\ATP 2015-09-25 19-59-33\01-30.M
Last changed   : 9/25/2015 8:29:10 PM by SSL
  
```

DAD1 D, Sig=220,2 Ref=360,100 (SSL\ATP 2015-09-25 19-59-33\SSL7-223-LP-MP.D)

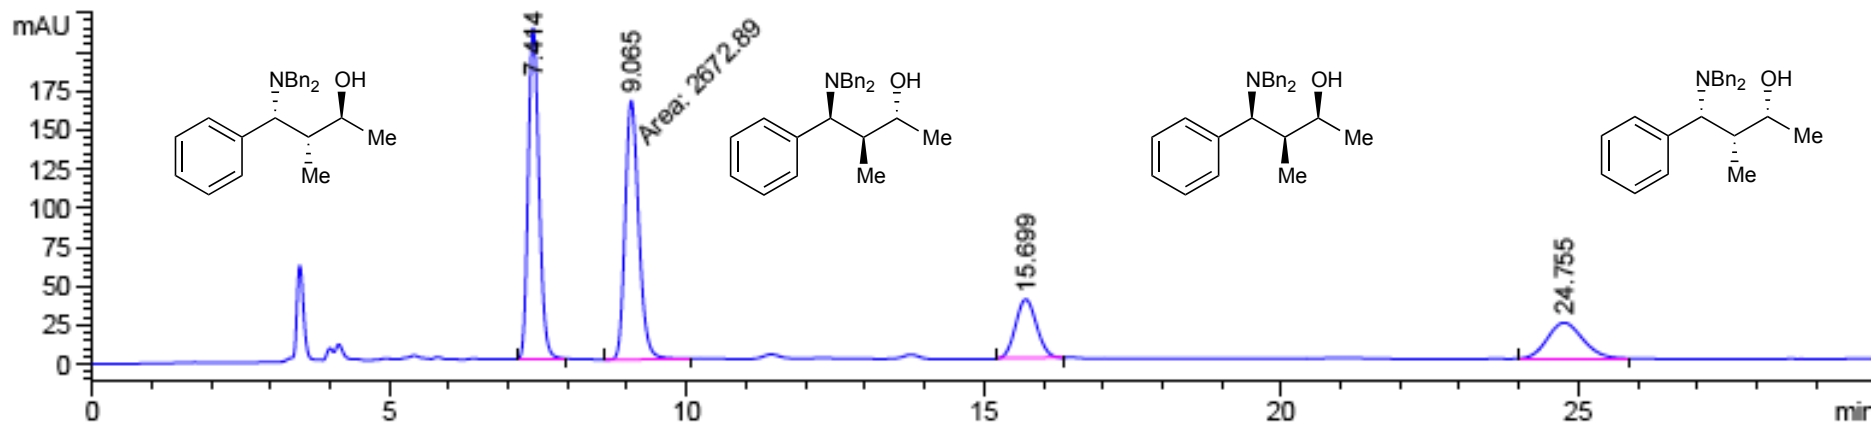

Signal 4: DAD1 D, Sig=220,2 Ref=360,100

| Peak # | RetTime [min] | Type | Width [min] | Area [mAU*s] | Height [mAU] | Area %  |
|--------|---------------|------|-------------|--------------|--------------|---------|
| 1      | 7.414         | BB   | 0.1982      | 2694.06079   | 212.10439    | 37.0524 |
| 2      | 9.065         | MM   | 0.2686      | 2672.89282   | 165.85046    | 36.7613 |
| 3      | 15.699        | BB   | 0.3875      | 940.10803    | 37.88538     | 12.9296 |
| 4      | 24.755        | BB   | 0.6477      | 963.88971    | 23.05795     | 13.2567 |

Totals : 7270.95135 438.89818

Sample Name: SSL7-241

```

=====
Acq. Operator   : SSL                      Seq. Line :    2
Acq. Instrument : Instrument 1              Location  : Vial 51
Injection Date  : 10/6/2015 9:27:39 PM    Inj       :    1
                                           Inj Volume: 5 µl
Different Inj Volume from Sequence !      Actual Inj Volume : 0.4 µl
Acq. Method    : C:\CHEM32\1\DATA\SSL\ATP 2015-10-06 21-00-30\01-30.M
Last changed   : 10/6/2015 9:26:27 PM by SSL

```

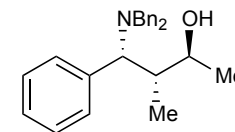

DAD1 D, Sig=220,2 Ref=360,100 (SSLATP 2015-10-06 21-00-30\SSL7-241.D)

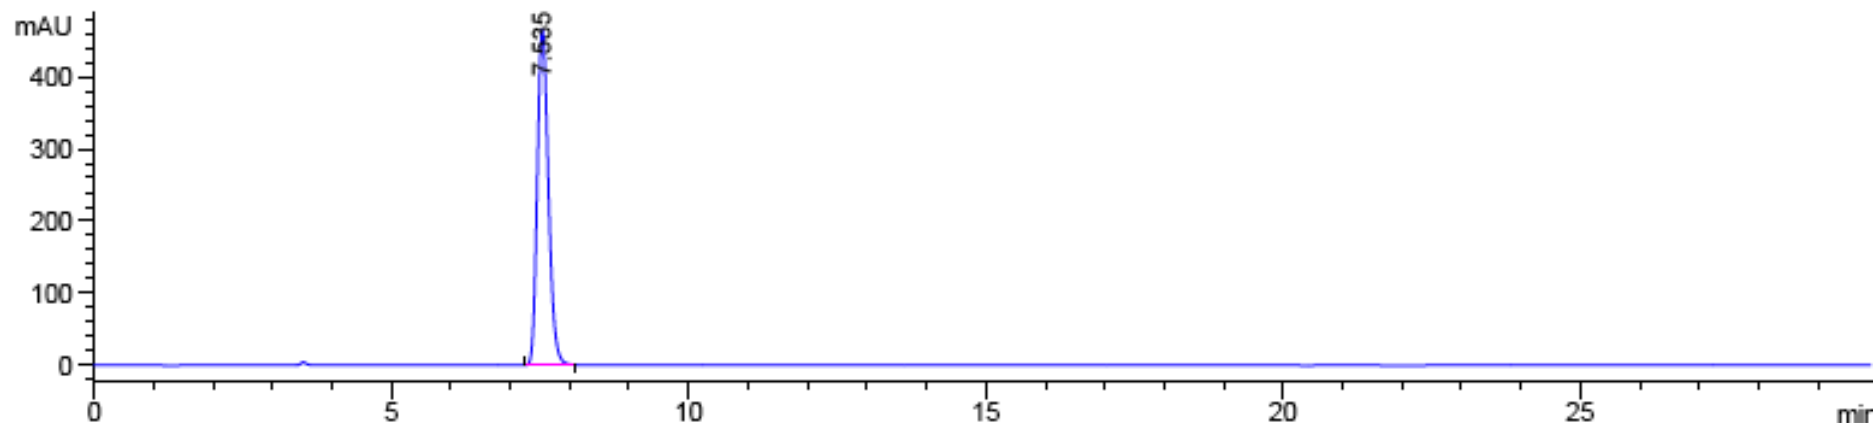

Signal 4: DAD1 D, Sig=220,2 Ref=360,100

| Peak # | RetTime [min] | Type | Width [min] | Area [mAU*s] | Height [mAU] | Area %   |
|--------|---------------|------|-------------|--------------|--------------|----------|
| 1      | 7.535         | BB   | 0.2018      | 6083.99463   | 467.47156    | 100.0000 |

Totals :                                    6083.99463    467.47156



Sample Name: SSL7-196A

```

=====
Acq. Operator   : SSL                      Seq. Line :    1
Acq. Instrument : Instrument 1             Location  : Vial 61
Injection Date  : 10/7/2015 10:29:33 AM   Inj       :    1
                                           Inj Volume: 5 µl
Acq. Method    : C:\CHEM32\1\DATA\SSL\ATP 2015-10-07 10-28-06\01-30.M
Last changed   : 10/7/2015 10:28:04 AM by SSL
  
```

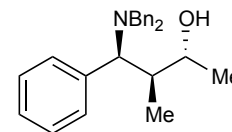

DAD1 D, Sig=220,2 Ref=360,100 (SSLATP 2015-10-07 10-28-06\SSL7-196A.D)

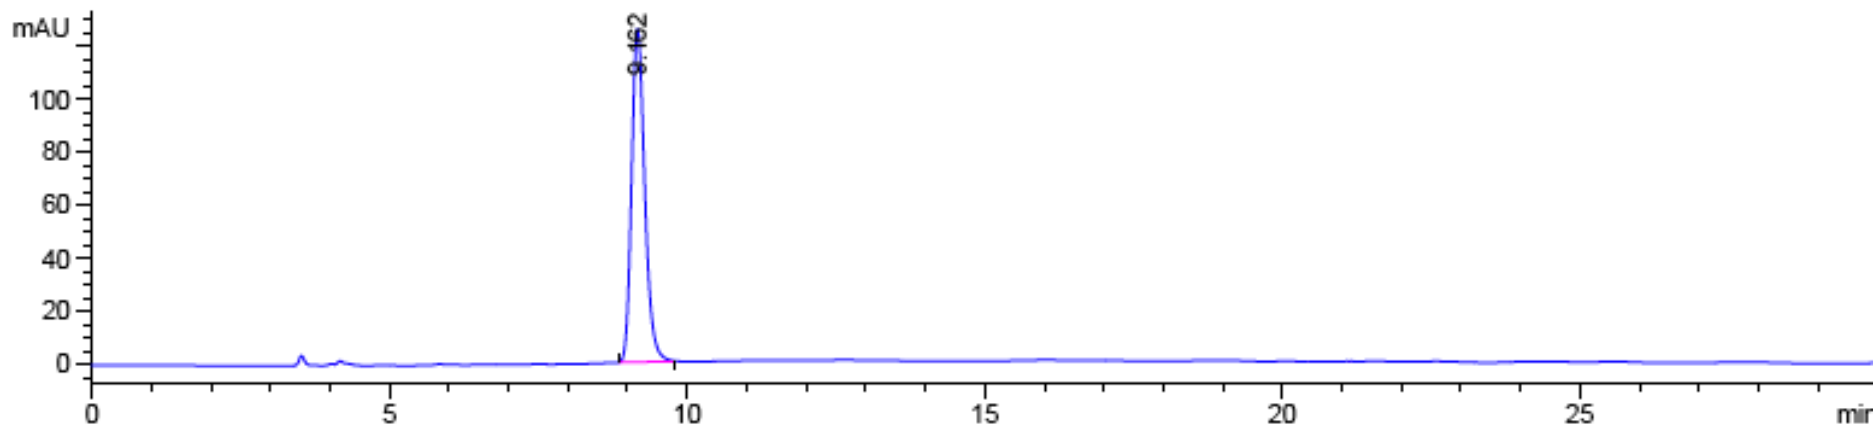

Signal 4: DAD1 D, Sig=220,2 Ref=360,100

| Peak # | RetTime [min] | Type | Width [min] | Area [mAU*s] | Height [mAU] | Area %   |
|--------|---------------|------|-------------|--------------|--------------|----------|
| 1      | 9.162         | BB   | 0.2381      | 1938.92920   | 125.57664    | 100.0000 |

Totals :                                    1938.92920    125.57664

Sample Name: SSL7-248B-MP

```

=====
Acq. Operator   : SSL                               Seq. Line :    3
Acq. Instrument : Instrument 1                       Location  : Vial 62
Injection Date  : 11/14/2015 3:45:42 AM           Inj       :    1
                                                    Inj Volume: 5 µl
Different Inj Volume from Sequence !      Actual Inj Volume : 3 µl
Acq. Method     : C:\CHEM32\1\DATA\SSL\NAOYUKI_LC 2015-11-14 02-41-55\01-30.M
Last changed    : 11/14/2015 2:41:53 AM by SSL
  
```

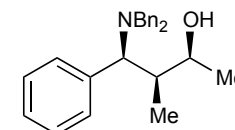

DAD1 D, Sig=220,2 Ref=360,100 (SSLNAOYUKI\_LC 2015-11-14 02-41-55\SSL7-248B-MP.D)

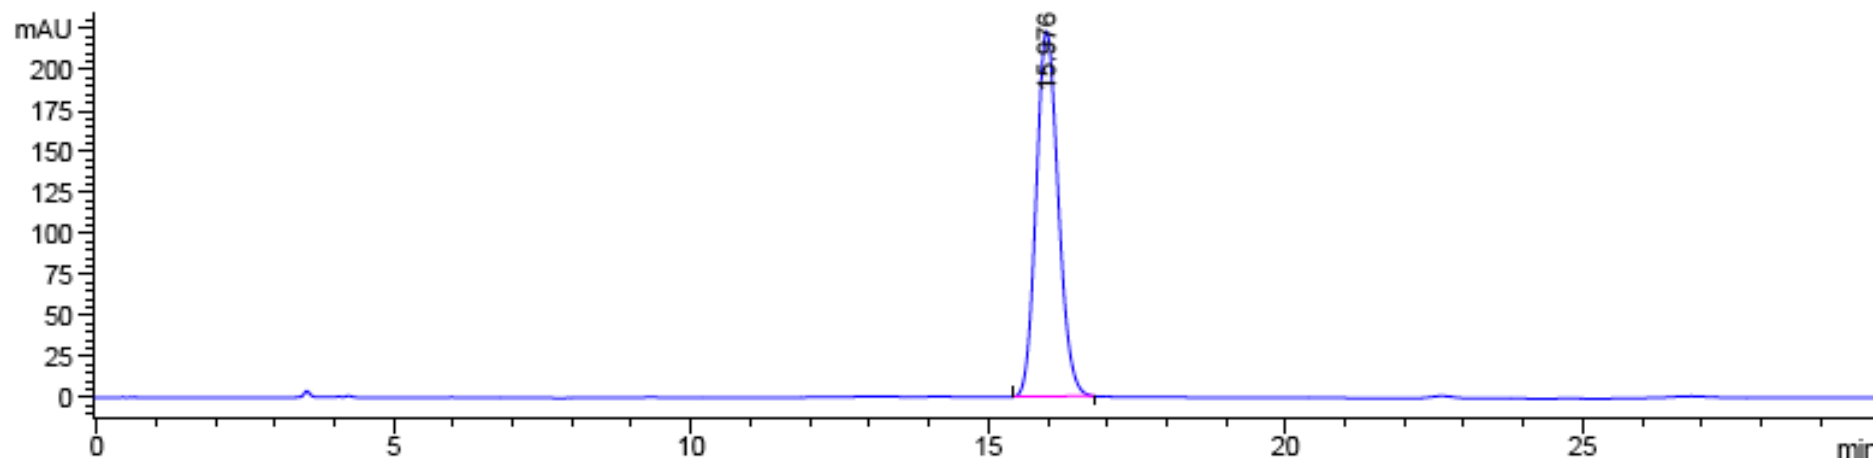

Signal 4: DAD1 D, Sig=220,2 Ref=360,100

| Peak # | RetTime [min] | Type | Width [min] | Area [mAU*s] | Height [mAU] | Area %   |
|--------|---------------|------|-------------|--------------|--------------|----------|
| 1      | 15.976        | BB   | 0.4030      | 5785.80664   | 222.80997    | 100.0000 |

Totals :                    5785.80664   222.80997

Sample Name: SSL7-252

```

=====
Acq. Operator   : SSL                               Seq. Line :    1
Acq. Instrument : Instrument 1                     Location  : Vial 61
Injection Date  : 11/14/2015 2:43:18 AM           Inj       :    1
                                                    Inj Volume: 5 µl
Acq. Method    : C:\CHEM32\1\DATA\SSL\NAOYUKI_LC 2015-11-14 02-41-55\01-30.M
Last changed   : 11/14/2015 2:41:53 AM by SSL
    
```

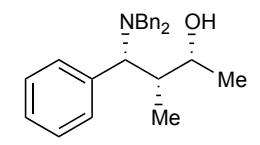

DAD1 D, Sig=220,2 Ref=360,100 (SSL\NAOYUKI\_LC 2015-11-14 02-41-55\SSL7-252.D)

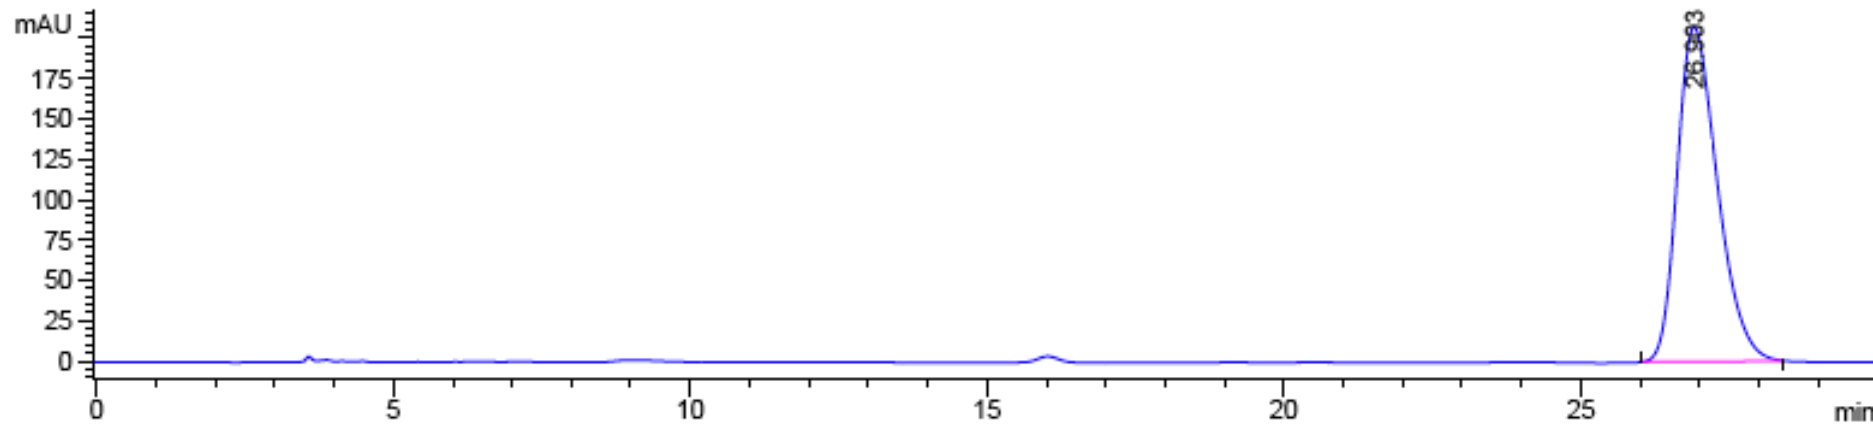

Signal 4: DAD1 D, Sig=220,2 Ref=360,100

| Peak # | RetTime [min] | Type | Width [min] | Area [mAU*s] | Height [mAU] | Area %   |
|--------|---------------|------|-------------|--------------|--------------|----------|
| 1      | 26.903        | BB   | 0.7261      | 9778.30176   | 207.38763    | 100.0000 |

Totals : 9778.30176 207.38763

Sample Name: SSL4-200-OH

```

=====
Acq. Operator   : SSL                      Seq. Line :    1
Acq. Instrument : Instrument 1              Location  : Vial 51
Injection Date  : 4/14/2014 10:49:19 AM    Inj       :    1
                                           Inj Volume: 5 µl
Different Inj Volume from Sequence !      Actual Inj Volume : 0.4 µl
Acq. Method    : C:\CHEM32\1\DATA\SSL\NAOYUKI_LC 2014-04-14 10-47-54\05-30.M
Last changed   : 4/13/2014 11:02:36 AM by SSL
  
```

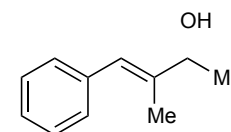

Racemic

DAD1 B, Sig=254,8 Ref=360,100 (SSLNAOYUKI\_LC 2014-04-14 10-47-54\SSL4-200-OH.D)

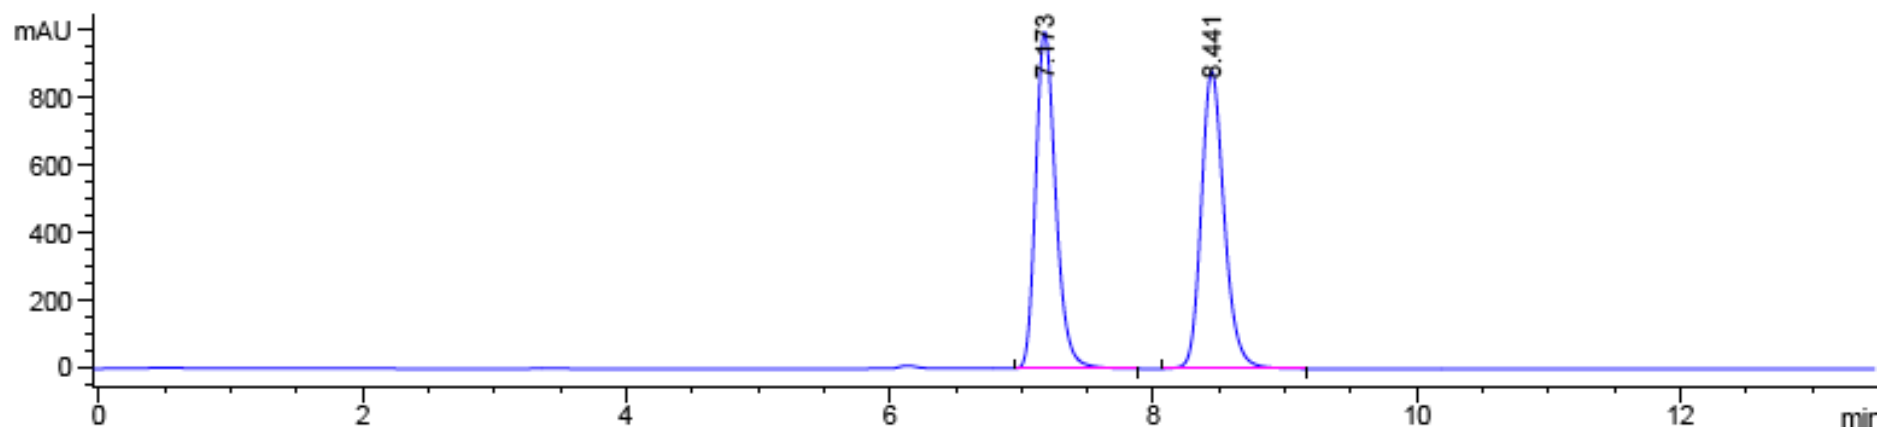

Signal 2: DAD1 B, Sig=254,8 Ref=360,100

| Peak # | RetTime [min] | Type | Width [min] | Area [mAU*s] | Height [mAU] | Area %  |
|--------|---------------|------|-------------|--------------|--------------|---------|
| 1      | 7.173         | BB   | 0.1610      | 1.05178e4    | 997.51160    | 49.6218 |
| 2      | 8.441         | BB   | 0.1855      | 1.06781e4    | 880.51263    | 50.3782 |

Totals : 2.11959e4 1878.02423

S208

Sample Name: SSL7-138

```

=====
Acq. Operator   : SSL                               Seq. Line :    1
Acq. Instrument : Instrument 1                       Location  : Vial 51
Injection Date  : 7/20/2015 7:19:09 PM             Inj       :    1
                                                    Inj Volume: 5 µl
Different Inj Volume from Sequence !   Actual Inj Volume : 3 µl
Acq. Method     : C:\CHEM32\1\DATA\SSL\NAOYUKI_LC 2015-07-20 19-16-45\05-60.M
Last changed    : 7/20/2015 7:16:43 PM by SSL
Analysis Method : C:\CHEM32\1\METHODS\10-30.M
  
```

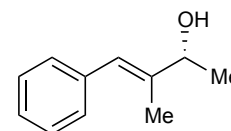

DAD1 B, Sig=254,8 Ref=360,100 (SSL\NAOYUKI\_LC 2015-07-20 19-16-45\SSL7-138.D)

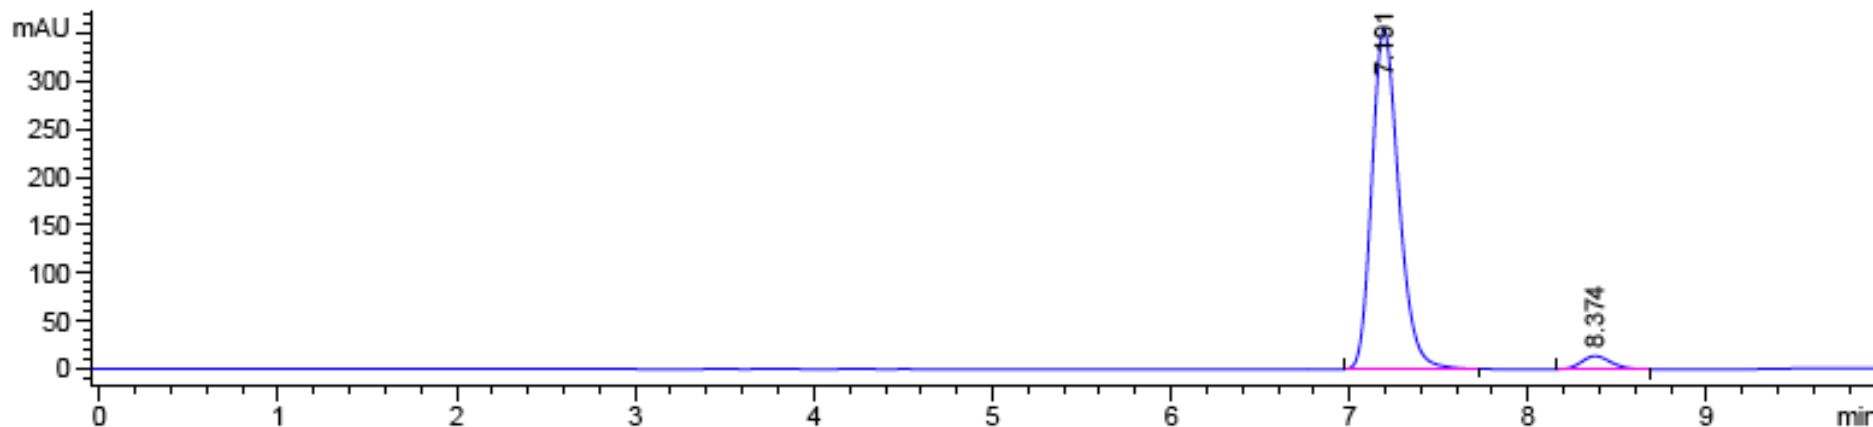

Signal 2: DAD1 B, Sig=254,8 Ref=360,100

| Peak # | RetTime [min] | Type | Width [min] | Area [mAU*s] | Height [mAU] | Area %  |
|--------|---------------|------|-------------|--------------|--------------|---------|
| 1      | 7.191         | BB   | 0.1602      | 3728.16626   | 355.93408    | 95.8873 |
| 2      | 8.374         | BB   | 0.1792      | 159.90430    | 13.80166     | 4.1127  |

Totals : 3888.07056 369.73574

Sample Name: SSL7-135

```

=====
Acq. Operator   : SSL                               Seq. Line :    1
Acq. Instrument : Instrument 1                       Location  : Vial 51
Injection Date  : 7/17/2015 4:41:46 PM             Inj       :    1
                                                    Inj Volume: 5 µl
Different Inj Volume from Sequence !   Actual Inj Volume : 2 µl
Acq. Method    : C:\CHEM32\1\DATA\SSL\NAOYUKI_LC 2015-07-17 16-39-22\05-30.M
Last changed   : 7/17/2015 4:03:41 PM by SSL
Analysis Method: C:\CHEM32\1\METHODS\10-30.M
  
```

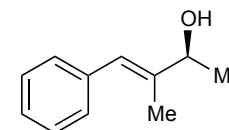

DAD1 D, Sig=220,2 Ref=360,100 (SSLNAOYUKI\_LC 2015-07-17 16-39-22\SSL7-135.D)

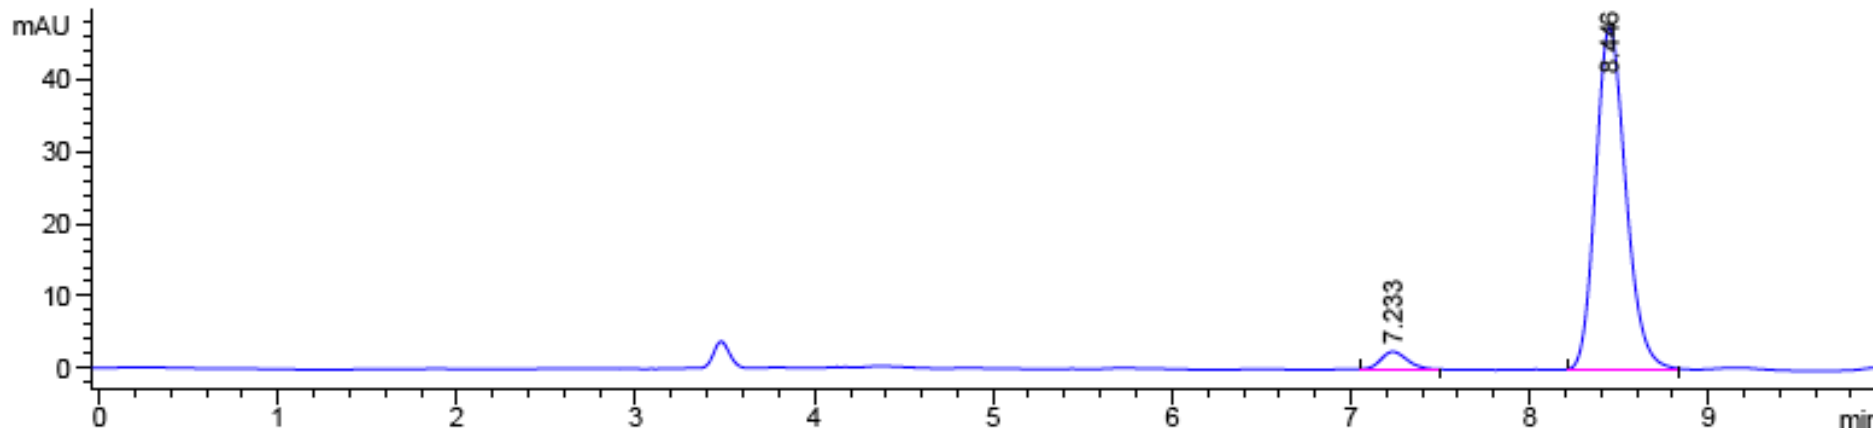

Signal 2: DAD1 D, Sig=220,2 Ref=360,100

| Peak # | RetTime [min] | Type | Width [min] | Area [mAU*s] | Height [mAU] | Area %  |
|--------|---------------|------|-------------|--------------|--------------|---------|
| 1      | 7.233         | BB   | 0.1603      | 25.90520     | 2.47071      | 4.4371  |
| 2      | 8.446         | BB   | 0.1810      | 557.93237    | 47.51030     | 95.5629 |

Totals : 583.83757 49.98101

Sample Name: SSL6-44AF3-RAC

```

=====
Acq. Operator   : SSL                               Seq. Line :    1
Acq. Instrument : Instrument 2                       Location  : Vial 21
Injection Date  : 10/14/2014 4:31:29 PM           Inj       :    1
                                                    Inj Volume: 5 µl
Different Inj Volume from Sequence !      Actual Inj Volume : 3 µl
Acq. Method    : C:\CHEM32\2\DATA\SSL\HPLC 2014-10-14 16-29-38\5IPA30.M
Last changed   : 10/14/2014 4:44:48 PM by SSL
  
```

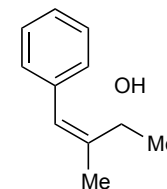

Racemic

DAD1 C, Sig=220,8 Ref=360,100 (C:\CHEM32\2\DATA\SSL\HPLC 2014-10-14 16-29-38\SSL6-44AF3-RAC.D)

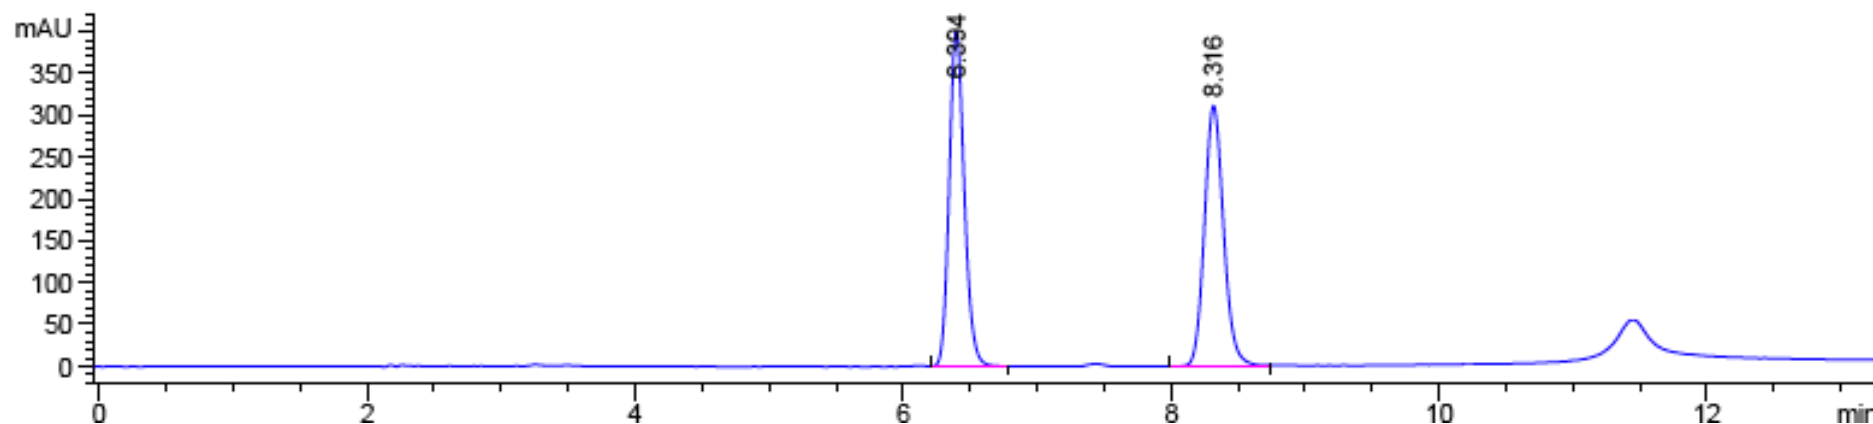

Signal 3: DAD1 C, Sig=220,8 Ref=360,100

| Peak # | RetTime [min] | Type | Width [min] | Area [mAU*s] | Height [mAU] | Area %  |
|--------|---------------|------|-------------|--------------|--------------|---------|
| 1      | 6.394         | VB   | 0.1215      | 3149.59424   | 401.46671    | 50.1508 |
| 2      | 8.316         | BB   | 0.1552      | 3130.65649   | 311.76419    | 49.8492 |

Totals : 6280.25073 713.23090

S211

Sample Name: SSL7-232

```

=====
Acq. Operator   : SSL                      Seq. Line :    1
Acq. Instrument : Instrument 1              Location  : Vial 44
Injection Date  : 10/3/2015 5:24:20 PM    Inj       :    1
                                           Inj Volume: 5 µl
Acq. Method    : C:\CHEM32\1\DATA\SSL\ATP 2015-10-03 17-23-00\05-30.M
Last changed   : 10/3/2015 5:22:58 PM by SSL
  
```

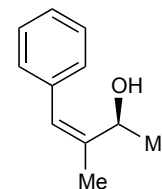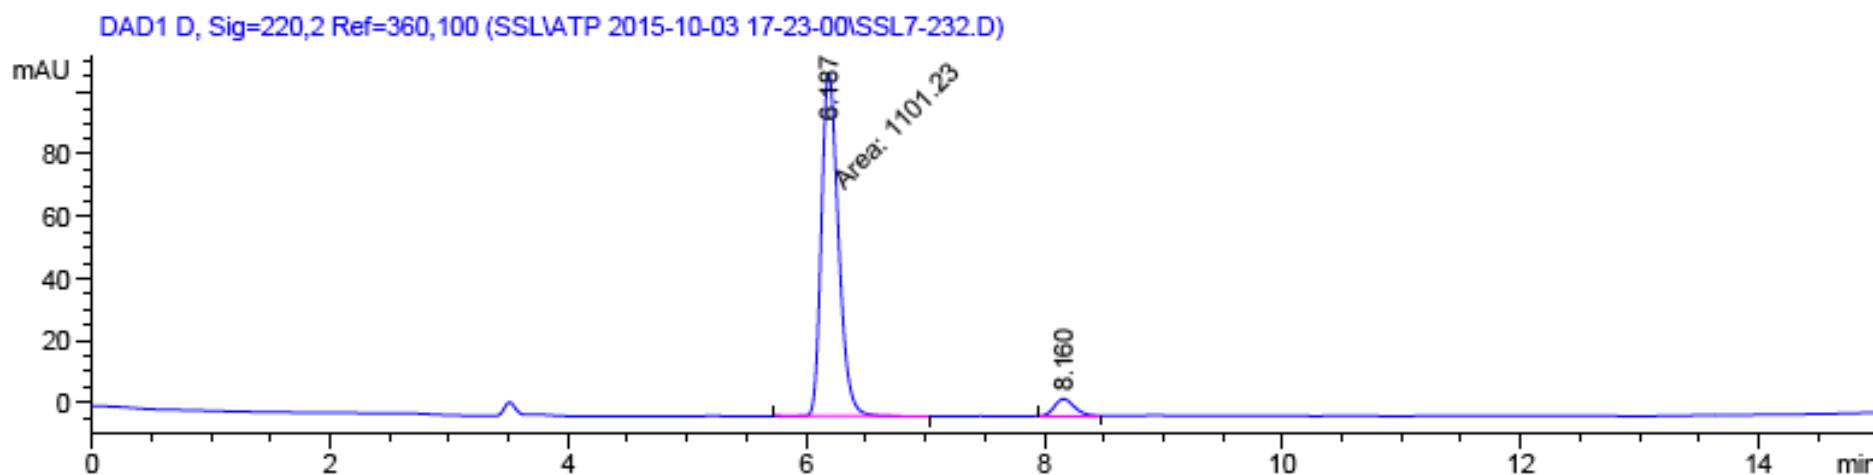

Signal 2: DAD1 D, Sig=220,2 Ref=360,100

| Peak # | RetTime [min] | Type | Width [min] | Area [mAU*s] | Height [mAU] | Area %  |
|--------|---------------|------|-------------|--------------|--------------|---------|
| 1      | 6.187         | MM   | 0.1656      | 1101.23376   | 110.86546    | 94.5828 |
| 2      | 8.160         | BB   | 0.1812      | 63.07291     | 5.44193      | 5.4172  |

Totals : 1164.30668 116.30739



Sample Name: SSL7-227

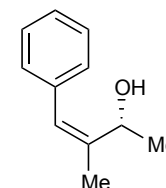

```

=====
Acq. Operator   : SSL                               Seq. Line :    1
Acq. Instrument : Instrument 1                       Location  : Vial 44
Injection Date  : 10/1/2015 8:01:53 PM             Inj       :    1
                                                    Inj Volume: 5 µl
Different Inj Volume from Sequence !   Actual Inj Volume : 1 µl
Acq. Method     : C:\CHEM32\1\DATA\SSL\ATP 2015-10-01 20-00-35\05-30.M
Last changed    : 10/1/2015 8:00:33 PM by SSL
  
```

DAD1 D, Sig=220,2 Ref=360,100 (SSLATP 2015-10-01 20-00-35\SSL7-227.D)

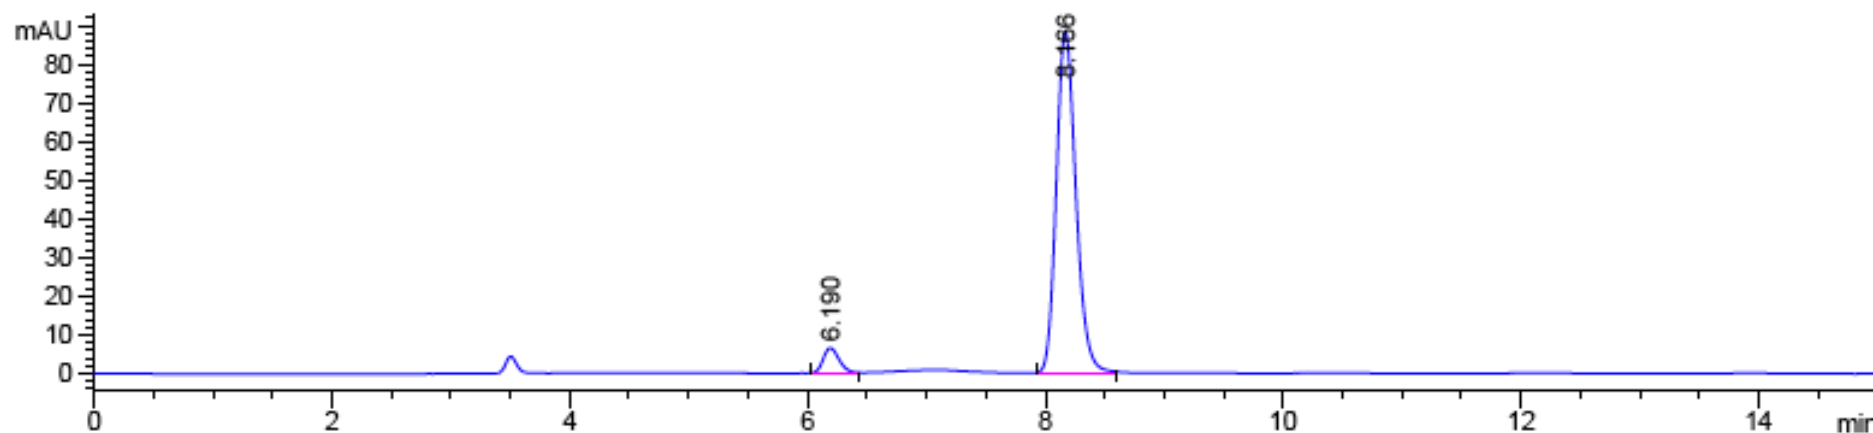

Signal 2: DAD1 D, Sig=220,2 Ref=360,100

| Peak # | RetTime [min] | Type | Width [min] | Area [mAU*s] | Height [mAU] | Area %  |
|--------|---------------|------|-------------|--------------|--------------|---------|
| 1      | 6.190         | BB   | 0.1410      | 59.11678     | 6.44685      | 5.5212  |
| 2      | 8.166         | BB   | 0.1776      | 1011.60748   | 88.34971     | 94.4788 |

Totals :                      1070.72426    94.79656
